# Supplementary material for: Cell-specific transcriptome changes in the hypothalamic arcuate nucleus in a mouse deoxycorticosterone acetate-salt model of hypertension
Source: Front Cell Neurosci. 2023 May 24;17:1207350. doi: 10.3389/fncel.2023.1207350 (PMC10244568; doi:10.3389/fncel.2023.1207350)
Supplement: Supplementary file 1 [file Data_Sheet_1.XLSX]

## Sheet: Table S4 Cluster Marker Genes
	p_val	avg_log2FC	pct.1	pct.2	p_val_adj	cluster	gene
Snhg11	0	0.677723	1	0.994	0	0	Snhg11
Meg3	0	0.607173	1	0.996	0	0	Meg3
Gm47283	5.54526e-122	0.431049	0.964	0.944	1.10905e-118	0	Gm47283
Kcnq1ot1	4.95621e-110	0.318649	0.973	0.96	9.91243e-107	0	Kcnq1ot1
AC149090.1	7.69756e-59	0.278232	0.882	0.87	1.53951e-55	0	AC149090.1
Syne1	1.9897e-43	0.252434	0.859	0.843	3.9794e-40	0	Syne1
Gm42418	0	0.651535	1	0.999	0	1	Gm42418
mt-Co1	0	0.648953	1	1	0	1	mt-Co1
mt-Nd2	0	0.528896	1	0.994	0	1	mt-Nd2
mt-Nd1	1.80567e-305	0.441388	1	0.989	3.61134e-302	1	mt-Nd1
Rpl41	2.78041e-284	0.456999	0.998	0.973	5.56082e-281	1	Rpl41
Rps21	2.44829e-273	0.465563	0.989	0.921	4.89658e-270	1	Rps21
Rps24	4.31987e-263	0.44256	0.997	0.975	8.63973e-260	1	Rps24
mt-Nd4l	1.20042e-249	0.471382	0.981	0.885	2.40083e-246	1	mt-Nd4l
mt-Nd5	1.52567e-243	0.465122	0.987	0.917	3.05135e-240	1	mt-Nd5
Rps29	3.19476e-241	0.441038	0.986	0.919	6.38952e-238	1	Rps29
mt-Nd3	2.89087e-236	0.491448	0.914	0.783	5.78174e-233	1	mt-Nd3
Rpl38	8.15372e-233	0.44122	0.989	0.937	1.63074e-229	1	Rpl38
Rpl9	1.72119e-232	0.437488	0.99	0.949	3.44238e-229	1	Rpl9
Rplp1	2.47386e-232	0.403987	0.996	0.963	4.94771e-229	1	Rplp1
Rpl21	4.99722e-224	0.424901	0.992	0.955	9.99443e-221	1	Rpl21
Rpl37	4.47109e-190	0.398128	0.987	0.941	8.94218e-187	1	Rpl37
Rpl37a	2.25788e-185	0.420465	0.973	0.903	4.51575e-182	1	Rpl37a
Rpl35a	1.92909e-177	0.370483	0.99	0.949	3.85818e-174	1	Rpl35a
Rps27a	3.20983e-172	0.382749	0.98	0.932	6.41966e-169	1	Rps27a
Cst3	1.12271e-167	0.25139	0.995	0.928	2.24541e-164	1	Cst3
Rps14	2.58636e-167	0.392827	0.907	0.809	5.17272e-164	1	Rps14
Rpl27a	4.39302e-162	0.37449	0.96	0.888	8.78604e-159	1	Rpl27a
Rpsa	2.32566e-160	0.351852	0.993	0.948	4.65131e-157	1	Rpsa
Rpl3	3.01248e-157	0.364432	0.971	0.91	6.02495e-154	1	Rpl3
Fth1	9.66503e-155	0.27523	0.989	0.941	1.93301e-151	1	Fth1
Eef1a1	2.7896e-154	0.319347	0.998	0.989	5.5792e-151	1	Eef1a1
Rps19	1.03084e-153	0.36498	0.955	0.878	2.06169e-150	1	Rps19
Fau	7.1909e-146	0.345813	0.987	0.95	1.43818e-142	1	Fau
Rpl23	1.56323e-142	0.342215	0.971	0.913	3.12646e-139	1	Rpl23
Rps8	4.56866e-136	0.329549	0.99	0.945	9.13733e-133	1	Rps8
Rpl26	2.5709e-135	0.354143	0.868	0.803	5.1418e-132	1	Rpl26
Rps11	1.33988e-130	0.353454	0.898	0.839	2.67975e-127	1	Rps11
Rpl32	4.10339e-129	0.35065	0.892	0.806	8.20678e-126	1	Rpl32
Cpe	1.85055e-124	0.320154	0.959	0.89	3.70111e-121	1	Cpe
Rps10	9.94427e-123	0.34302	0.891	0.832	1.98885e-119	1	Rps10
Rpl36	1.19382e-117	0.33138	0.936	0.858	2.38763e-114	1	Rpl36
Rpl19	1.98885e-110	0.290651	0.987	0.957	3.97771e-107	1	Rpl19
Rps20	1.42048e-108	0.313461	0.919	0.843	2.84097e-105	1	Rps20
Rpl13	4.9051e-102	0.261266	0.996	0.975	9.81021e-99	1	Rpl13
Rpl11	8.5564e-99	0.297562	0.967	0.907	1.71128e-95	1	Rpl11
Rpl14	1.13824e-97	0.302452	0.905	0.833	2.27648e-94	1	Rpl14
Rpl8	1.36622e-94	0.277939	0.96	0.906	2.73244e-91	1	Rpl8
Mt3	4.23793e-93	0.305803	0.872	0.8	8.47586e-90	1	Mt3
Rps12	1.29571e-92	0.307362	0.821	0.754	2.59142e-89	1	Rps12
mt-Atp8	4.63546e-91	0.250166	0.719	0.619	9.27091e-88	1	mt-Atp8
Rps27	3.41539e-88	0.300559	0.89	0.829	6.83079e-85	1	Rps27
Rpl24	1.10786e-85	0.272459	0.928	0.866	2.21572e-82	1	Rpl24
Rps23	3.73022e-83	0.275621	0.892	0.809	7.46044e-80	1	Rps23
6330403K07Rik	1.23521e-81	0.263897	0.985	0.937	2.47042e-78	1	6330403K07Rik
Rpl17	1.37474e-76	0.314323	0.726	0.676	2.74947e-73	1	Rpl17
Gad2	0	1.08733	0.961	0.609	0	2	Gad2
Syt1	0	0.980017	0.978	0.865	0	2	Syt1
Meg31	0	0.946825	1	0.996	0	2	Meg3
Nrxn3	0	0.69925	0.945	0.702	0	2	Nrxn3
Gad1	0	0.652479	0.863	0.501	0	2	Gad1
Elavl2	0	0.648844	0.902	0.468	0	2	Elavl2
Slc32a1	0	0.610902	0.801	0.392	0	2	Slc32a1
Epha5	0	0.605737	0.938	0.547	0	2	Epha5
Snap25	0	0.553105	0.976	0.916	0	2	Snap25
Slc6a1	0	0.479314	0.867	0.486	0	2	Slc6a1
Htr2c	0	0.426474	0.784	0.418	0	2	Htr2c
Bcl11a	0	0.389076	0.936	0.557	0	2	Bcl11a
Tenm1	0	0.367724	0.908	0.548	0	2	Tenm1
Cplx2	0	0.351415	0.949	0.662	0	2	Cplx2
Sphkap	0	0.344529	0.901	0.459	0	2	Sphkap
Fstl5	0	0.335614	0.865	0.418	0	2	Fstl5
Unc5d	0	0.305547	0.906	0.614	0	2	Unc5d
Snca	0	0.290375	0.865	0.519	0	2	Snca
Tmeff2	0	0.283232	0.941	0.466	0	2	Tmeff2
Lhx6	0	0.281992	0.95	0.527	0	2	Lhx6
Grik1	0	0.252941	0.903	0.445	0	2	Grik1
C130073E24Rik	4.7509e-306	0.274201	0.868	0.513	9.50181e-303	2	C130073E24Rik
Snhg111	2.90135e-303	0.523595	1	0.994	5.80271e-300	2	Snhg11
Nefm	1.90782e-280	0.261401	0.755	0.382	3.81564e-277	2	Nefm
Opcml	2.42145e-266	0.383837	0.878	0.547	4.8429e-263	2	Opcml
Atp1b1	1.91026e-264	0.420685	0.995	0.974	3.82053e-261	2	Atp1b1
Gabra1	3.84997e-262	0.563115	0.797	0.452	7.69994e-259	2	Gabra1
Dpp10	1.20155e-237	0.260672	0.777	0.435	2.4031e-234	2	Dpp10
Pcdh10	3.21494e-236	0.332203	0.896	0.56	6.42987e-233	2	Pcdh10
Sncb	1.82086e-232	0.497209	0.8	0.466	3.64171e-229	2	Sncb
Cadm2	3.70687e-219	0.312072	0.866	0.571	7.41373e-216	2	Cadm2
Pclo	6.97676e-192	0.402004	0.977	0.819	1.39535e-188	2	Pclo
Pcdh9	1.27896e-188	0.326681	0.87	0.615	2.55792e-185	2	Pcdh9
Tubb3	1.97879e-186	0.42795	0.828	0.611	3.95758e-183	2	Tubb3
Camk2d	9.34663e-174	0.300526	0.874	0.612	1.86933e-170	2	Camk2d
2900097C17Rik	3.00699e-171	0.360005	0.967	0.913	6.01397e-168	2	2900097C17Rik
Ttc3	4.73026e-153	0.28141	1	0.995	9.46051e-150	2	Ttc3
Chl1	4.23287e-142	0.28984	0.759	0.478	8.46574e-139	2	Chl1
AC149090.11	8.92881e-126	0.297336	0.975	0.863	1.78576e-122	2	AC149090.1
Kcnq1ot11	4.05588e-119	0.309222	0.991	0.958	8.11177e-116	2	Kcnq1ot1
Impact	1.3986e-116	0.275809	0.954	0.876	2.7972e-113	2	Impact
Fut9	3.19515e-108	0.327348	0.698	0.448	6.3903e-105	2	Fut9
Gria2	7.89933e-100	0.251283	0.995	0.969	1.57987e-96	2	Gria2
Cplx1	1.64656e-94	0.391261	0.619	0.337	3.29313e-91	2	Cplx1
Syn2	1.45417e-88	0.280485	0.842	0.697	2.90833e-85	2	Syn2
Zic1	2.71172e-86	0.316014	0.545	0.222	5.42343e-83	2	Zic1
Celf4	3.45474e-78	0.252424	0.982	0.935	6.90948e-75	2	Celf4
Gm424181	0	0.831564	1	0.999	0	3	Gm42418
Rps121	0	0.580809	0.975	0.742	0	3	Rps12
mt-Co11	0	0.484143	1	1	0	3	mt-Co1
Rps291	2.34658e-243	0.533361	0.999	0.918	4.69316e-240	3	Rps29
mt-Nd31	2.40949e-241	0.515147	0.988	0.778	4.81897e-238	3	mt-Nd3
Rps211	2.55786e-237	0.520458	0.999	0.921	5.11573e-234	3	Rps21
Rps101	6.71934e-237	0.509072	0.993	0.824	1.34387e-233	3	Rps10
Rps231	4.37041e-228	0.509486	0.995	0.801	8.74082e-225	3	Rps23
mt-Nd21	2.32279e-212	0.373543	1	0.994	4.64558e-209	3	mt-Nd2
Rpl321	1.44416e-207	0.463134	0.993	0.798	2.88832e-204	3	Rpl32
mt-Nd11	1.84671e-177	0.339709	1	0.989	3.69342e-174	3	mt-Nd1
Rpl141	2.36622e-174	0.438293	0.995	0.825	4.73244e-171	3	Rpl14
Rps111	2.08813e-154	0.417686	0.994	0.832	4.17627e-151	3	Rps11
Rpl411	1.4478e-151	0.372671	0.999	0.973	2.8956e-148	3	Rpl41
Pfdn5	1.90439e-147	0.401778	0.927	0.729	3.80879e-144	3	Pfdn5
Rps191	2.67567e-146	0.420533	0.997	0.875	5.35134e-143	3	Rps19
Rps141	1.25526e-144	0.402556	0.993	0.803	2.51051e-141	3	Rps14
Rpl31	5.14817e-137	0.405184	0.998	0.909	1.02963e-133	3	Rpl3
Rps271	5.60121e-132	0.369537	0.992	0.821	1.12024e-128	3	Rps27
Rplp11	8.9965e-109	0.317466	1	0.963	1.7993e-105	3	Rplp1
Rpl91	3.46301e-106	0.310733	0.999	0.949	6.92601e-103	3	Rpl9
Rpl371	5.27087e-102	0.328014	0.999	0.94	1.05417e-98	3	Rpl37
Rps241	5.51028e-101	0.291357	1	0.975	1.10206e-97	3	Rps24
Rpl261	5.99863e-101	0.330926	0.988	0.793	1.19973e-97	3	Rpl26
mt-Nd4l1	8.65562e-99	0.325418	0.999	0.884	1.73112e-95	3	mt-Nd4l
Rpl131	9.84099e-97	0.28921	1	0.975	1.9682e-93	3	Rpl13
Gap43	7.32987e-91	0.295686	0.958	0.743	1.46597e-87	3	Gap43
Rab3c	1.49726e-89	0.26144	0.994	0.826	2.99452e-86	3	Rab3c
Rpl381	1.19714e-88	0.341382	0.999	0.936	2.39428e-85	3	Rpl38
Rps201	4.20979e-86	0.296347	0.995	0.838	8.41958e-83	3	Rps20
Rpl81	7.30336e-86	0.327109	0.997	0.903	1.46067e-82	3	Rpl8
Rpl27a1	1.50916e-85	0.314816	0.998	0.885	3.01831e-82	3	Rpl27a
Rpl18a	1.93218e-79	0.289928	0.992	0.819	3.86436e-76	3	Rpl18a
Rpl231	4.23866e-79	0.314592	0.998	0.911	8.47731e-76	3	Rpl23
Rps3a1	5.98679e-76	0.282118	0.995	0.82	1.19736e-72	3	Rps3a1
mt-Nd51	2.99721e-72	0.264358	0.999	0.916	5.99443e-69	3	mt-Nd5
Rpl191	2.47426e-71	0.283104	1	0.956	4.94853e-68	3	Rpl19
Mt31	8.0039e-71	0.263142	0.982	0.792	1.60078e-67	3	Mt3
Rpl111	1.977e-67	0.292019	0.998	0.905	3.954e-64	3	Rpl11
Rpl37a1	5.26427e-67	0.27821	0.998	0.902	1.05285e-63	3	Rpl37a
Rpl10	7.82924e-60	0.318448	0.74	0.63	1.56585e-56	3	Rpl10
Rpl35a1	5.13633e-59	0.257391	0.999	0.948	1.02727e-55	3	Rpl35a
Rpl171	9.15497e-57	0.260926	0.857	0.666	1.83099e-53	3	Rpl17
Rpl241	2.27273e-50	0.263379	0.997	0.861	4.54547e-47	3	Rpl24
Apoe	0	1.01299	0.994	0.798	0	4	Apoe
Itih3	0	0.976228	0.847	0.366	0	4	Itih3
Atp1a2	0	0.972117	0.97	0.663	0	4	Atp1a2
Agt	0	0.947021	0.868	0.386	0	4	Agt
Slc6a11	0	0.911548	0.878	0.422	0	4	Slc6a11
Slc1a2	0	0.898715	0.985	0.808	0	4	Slc1a2
Sparcl1	0	0.811924	0.946	0.651	0	4	Sparcl1
Gm3764	0	0.797131	0.878	0.498	0	4	Gm3764
Cst31	0	0.782089	0.999	0.928	0	4	Cst3
Sparc	0	0.778758	0.93	0.654	0	4	Sparc
Slc4a4	0	0.774174	0.843	0.464	0	4	Slc4a4
Slc1a3	0	0.771997	0.871	0.462	0	4	Slc1a3
Ndrg2	0	0.737707	0.959	0.637	0	4	Ndrg2
Ntsr2	0	0.706556	0.753	0.375	0	4	Ntsr2
Bcan	0	0.606787	0.791	0.461	0	4	Bcan
Fgfr3	0	0.56858	0.745	0.364	0	4	Fgfr3
Timp3	0	0.41851	0.804	0.447	0	4	Timp3
Kcnj10	0	0.404706	0.766	0.41	0	4	Kcnj10
Plpp3	5.7813e-308	0.559298	0.791	0.532	1.15626e-304	4	Plpp3
mt-Nd22	4.54776e-286	0.459393	0.999	0.995	9.09551e-283	4	mt-Nd2
Ptch1	2.74579e-279	0.480106	0.768	0.503	5.49158e-276	4	Ptch1
mt-Co12	1.05835e-277	0.421715	1	1	2.1167e-274	4	mt-Co1
Aldoc	3.63885e-269	0.495836	0.885	0.633	7.27771e-266	4	Aldoc
mt-Nd12	3.08139e-264	0.461434	0.999	0.989	6.16277e-261	4	mt-Nd1
Clu	1.04494e-261	0.483451	0.905	0.692	2.08988e-258	4	Clu
Glul	5.61249e-260	0.466071	0.869	0.578	1.1225e-256	4	Glul
Ttyh1	5.91476e-259	0.538284	0.81	0.563	1.18295e-255	4	Ttyh1
Ntrk2	1.55679e-258	0.452039	0.964	0.847	3.11358e-255	4	Ntrk2
Id2	1.41672e-257	0.340264	0.714	0.441	2.83344e-254	4	Id2
Gpr37l1	2.06593e-240	0.495686	0.702	0.409	4.13187e-237	4	Gpr37l1
Mt1	1.34159e-233	0.47403	0.858	0.55	2.68318e-230	4	Mt1
Gja1	3.16544e-229	0.469961	0.677	0.383	6.33087e-226	4	Gja1
Grk3	6.36087e-226	0.293766	0.795	0.56	1.27217e-222	4	Grk3
Slc6a12	7.89689e-225	0.435749	0.791	0.494	1.57938e-221	4	Slc6a1
Sdc4	2.82567e-222	0.358834	0.633	0.328	5.65134e-219	4	Sdc4
Acsl3	5.6734e-216	0.387852	0.766	0.474	1.13468e-212	4	Acsl3
Ckb	3.31489e-215	0.388318	0.98	0.922	6.62978e-212	4	Ckb
Hes5	7.5756e-202	0.410894	0.636	0.356	1.51512e-198	4	Hes5
Ednrb	9.85339e-196	0.372403	0.644	0.378	1.97068e-192	4	Ednrb
Fam107a	1.64716e-188	0.30809	0.739	0.522	3.29433e-185	4	Fam107a
Qk	5.62773e-187	0.323026	0.782	0.473	1.12555e-183	4	Qk
Scd2	4.73805e-178	0.307534	0.948	0.837	9.47611e-175	4	Scd2
Gpm6b	6.08064e-169	0.340414	0.813	0.557	1.21613e-165	4	Gpm6b
Nfia	1.14037e-165	0.30279	0.66	0.38	2.28073e-162	4	Nfia
Cpe1	9.02372e-159	0.337009	0.962	0.89	1.80474e-155	4	Cpe
Paqr6	3.88659e-135	0.263558	0.589	0.355	7.77319e-132	4	Paqr6
Nwd1	1.87131e-134	0.284291	0.579	0.332	3.74263e-131	4	Nwd1
Ptprz1	1.25391e-132	0.266344	0.842	0.647	2.50782e-129	4	Ptprz1
Etnppl	4.90163e-128	0.37101	0.564	0.299	9.80327e-125	4	Etnppl
Atp1b2	5.80329e-125	0.416747	0.678	0.416	1.16066e-121	4	Atp1b2
Pla2g7	1.98349e-123	0.386605	0.568	0.283	3.96699e-120	4	Pla2g7
5031439G07Rik	8.31765e-122	0.267877	0.735	0.516	1.66353e-118	4	5031439G07Rik
Slc7a10	1.28202e-110	0.41393	0.576	0.337	2.56404e-107	4	Slc7a10
Slc7a11	2.98904e-107	0.29361	0.597	0.392	5.97808e-104	4	Slc7a11
Mmd2	7.07282e-107	0.400961	0.62	0.405	1.41456e-103	4	Mmd2
mt-Nd52	4.99009e-105	0.291817	0.971	0.919	9.98017e-102	4	mt-Nd5
Dbi	8.82899e-104	0.277117	0.722	0.436	1.7658e-100	4	Dbi
Ntm	3.60735e-93	0.26209	0.826	0.672	7.21469e-90	4	Ntm
Serpine2	1.10896e-90	0.29458	0.669	0.484	2.21792e-87	4	Serpine2
Son	2.86044e-87	0.250831	0.948	0.882	5.72088e-84	4	Son
Mt2	2.26223e-86	0.344875	0.62	0.41	4.52447e-83	4	Mt2
S1pr1	6.29039e-81	0.279651	0.585	0.396	1.25808e-77	4	S1pr1
2310022B05Rik	5.33345e-80	0.33961	0.568	0.354	1.06669e-76	4	2310022B05Rik
mt-Nd4l2	8.23884e-78	0.258444	0.959	0.888	1.64777e-74	4	mt-Nd4l
Tubb2b	1.05664e-69	0.262926	0.671	0.506	2.11328e-66	4	Tubb2b
Tril	7.78641e-68	0.272831	0.57	0.404	1.55728e-64	4	Tril
Htra1	4.47213e-66	0.268767	0.544	0.325	8.94427e-63	4	Htra1
Mfge8	6.39052e-62	0.334084	0.532	0.323	1.2781e-58	4	Mfge8
Gpld1	1.60665e-55	0.264842	0.526	0.308	3.21331e-52	4	Gpld1
Sst	2.33425e-53	0.324034	0.682	0.542	4.66851e-50	4	Sst
Nkain4	1.15641e-45	0.312739	0.512	0.343	2.31282e-42	4	Nkain4
Mlc1	9.12989e-26	0.252567	0.497	0.343	1.82598e-22	4	Mlc1
Cacna2d1	0	1.32303	0.975	0.664	0	5	Cacna2d1
Rasgrf2	0	1.18008	0.946	0.478	0	5	Rasgrf2
Gda	0	1.06582	0.948	0.63	0	5	Gda
Nrgn	0	1.05113	0.88	0.526	0	5	Nrgn
Camkv	0	0.876757	0.916	0.637	0	5	Camkv
Cbln1	0	0.838157	0.856	0.289	0	5	Cbln1
Ncdn	0	0.831529	0.929	0.614	0	5	Ncdn
Meg32	0	0.818486	1	0.996	0	5	Meg3
Tmem35a	0	0.814172	0.86	0.56	0	5	Tmem35a
Calb1	0	0.79482	0.885	0.47	0	5	Calb1
Slc17a6	0	0.777487	0.896	0.556	0	5	Slc17a6
Ppp3ca	0	0.710947	0.984	0.875	0	5	Ppp3ca
Thy1	0	0.706355	0.89	0.526	0	5	Thy1
Grm5	0	0.67672	0.895	0.591	0	5	Grm5
Adcyap1	0	0.665373	0.858	0.414	0	5	Adcyap1
Ahi1	0	0.657682	1	0.985	0	5	Ahi1
Nr2f2	0	0.649422	0.728	0.248	0	5	Nr2f2
Gria3	0	0.64018	0.91	0.637	0	5	Gria3
Lmo3	0	0.630469	0.752	0.48	0	5	Lmo3
Fezf1	0	0.624477	0.747	0.309	0	5	Fezf1
Gabrb1	0	0.623798	0.947	0.742	0	5	Gabrb1
Cdh13	0	0.622941	0.859	0.432	0	5	Cdh13
Psap	0	0.595566	0.997	0.974	0	5	Psap
Lcorl	0	0.585649	0.821	0.547	0	5	Lcorl
Snap251	0	0.555066	0.985	0.916	0	5	Snap25
Map1b	0	0.554798	0.996	0.968	0	5	Map1b
Cnr1	0	0.545507	0.783	0.418	0	5	Cnr1
App	0	0.537419	0.994	0.958	0	5	App
Car10	0	0.510418	0.811	0.494	0	5	Car10
6330403K07Rik1	0	0.500648	0.988	0.937	0	5	6330403K07Rik
Nptx2	0	0.500418	0.774	0.403	0	5	Nptx2
Megf11	0	0.471836	0.766	0.353	0	5	Megf11
H2-Q2	0	0.446502	0.762	0.397	0	5	H2-Q2
Rbfox1	0	0.440091	0.786	0.481	0	5	Rbfox1
C1ql2	0	0.371831	0.769	0.359	0	5	C1ql2
Nefm1	0	0.358916	0.729	0.389	0	5	Nefm
Brinp3	0	0.333737	0.802	0.453	0	5	Brinp3
Lypd1	0	0.315455	0.763	0.383	0	5	Lypd1
Cdh6	0	0.303192	0.776	0.56	0	5	Cdh6
Myh7	6.51358e-305	0.55487	0.688	0.36	1.30272e-301	5	Myh7
Rreb1	1.15963e-302	0.504403	0.786	0.639	2.31926e-299	5	Rreb1
Calm1	3.57107e-297	0.464267	0.996	0.98	7.14213e-294	5	Calm1
Atp1a1	7.73825e-291	0.551432	0.922	0.763	1.54765e-287	5	Atp1a1
Slc24a2	7.07361e-278	0.362076	0.812	0.52	1.41472e-274	5	Slc24a2
Atp1b11	7.94033e-268	0.453551	0.996	0.974	1.58807e-264	5	Atp1b1
Pcsk1n	8.44177e-267	0.438814	0.998	0.991	1.68835e-263	5	Pcsk1n
2900097C17Rik1	4.47532e-265	0.459871	0.981	0.913	8.95064e-262	5	2900097C17Rik
Snhg112	8.03576e-263	0.525297	1	0.994	1.60715e-259	5	Snhg11
Lmo4	4.5342e-258	0.362463	0.767	0.573	9.06841e-255	5	Lmo4
Lbhd2	2.47687e-256	0.578043	0.663	0.318	4.95374e-253	5	Lbhd2
Maged1	1.68136e-254	0.454054	0.975	0.947	3.36272e-251	5	Maged1
Arpp21	3.56583e-254	0.333765	0.834	0.695	7.13166e-251	5	Arpp21
Hcn1	1.37753e-252	0.355104	0.713	0.387	2.75506e-249	5	Hcn1
Spock1	1.87344e-252	0.416825	0.799	0.477	3.74689e-249	5	Spock1
Pam	2.82034e-239	0.466406	0.905	0.721	5.64069e-236	5	Pam
Nptx1	4.24724e-236	0.502014	0.645	0.305	8.49447e-233	5	Nptx1
Kcnq3	5.45653e-232	0.441755	0.8	0.609	1.09131e-228	5	Kcnq3
Bdnf	4.46785e-228	0.307704	0.648	0.393	8.9357e-225	5	Bdnf
Ttc31	8.61675e-227	0.373253	0.999	0.995	1.72335e-223	5	Ttc3
Snca1	6.59147e-225	0.369088	0.785	0.53	1.31829e-221	5	Snca
Sorbs2	1.06498e-223	0.405563	0.84	0.651	2.12996e-220	5	Sorbs2
Adgrl2	1.0578e-220	0.362846	0.793	0.605	2.11561e-217	5	Adgrl2
Plcb4	5.06163e-218	0.385263	0.787	0.537	1.01233e-214	5	Plcb4
Rtn1	2.79306e-217	0.399631	0.993	0.974	5.58612e-214	5	Rtn1
Ntng1	6.67149e-217	0.286279	0.761	0.52	1.3343e-213	5	Ntng1
Zwint	1.5208e-216	0.416491	0.979	0.94	3.04161e-213	5	Zwint
Chga	2.66894e-213	0.539909	0.757	0.459	5.33788e-210	5	Chga
Chl11	9.09372e-211	0.418948	0.77	0.482	1.81874e-207	5	Chl1
Ywhag	9.08097e-205	0.417547	0.945	0.86	1.81619e-201	5	Ywhag
Hspa8	2.20163e-188	0.3481	0.991	0.981	4.40327e-185	5	Hspa8
Hap1	8.06838e-188	0.383743	0.982	0.941	1.61368e-184	5	Hap1
Calm2	4.90987e-184	0.353661	0.984	0.964	9.81973e-181	5	Calm2
C230004F18Rik	1.3399e-183	0.411077	0.928	0.719	2.67981e-180	5	C230004F18Rik
Opcml1	5.91228e-176	0.498044	0.766	0.56	1.18246e-172	5	Opcml
Ubb	1.12785e-170	0.351691	0.982	0.957	2.25569e-167	5	Ubb
Ar	2.32389e-169	0.338248	0.725	0.493	4.64779e-166	5	Ar
Deptor	4.10029e-165	0.309519	0.632	0.439	8.20059e-162	5	Deptor
Syn21	1.25566e-159	0.388556	0.875	0.697	2.51133e-156	5	Syn2
Tshz2	1.58078e-156	0.290747	0.754	0.515	3.16155e-153	5	Tshz2
Ly6h	9.85976e-152	0.319024	0.991	0.965	1.97195e-148	5	Ly6h
Dgkb	1.26558e-151	0.408703	0.753	0.576	2.53117e-148	5	Dgkb
Ppia	3.80445e-151	0.327839	0.983	0.96	7.60889e-148	5	Ppia
Hsp90aa1	2.34218e-150	0.311066	0.991	0.98	4.68436e-147	5	Hsp90aa1
Peg3	1.2873e-148	0.329771	0.996	0.972	2.57459e-145	5	Peg3
Nr5a1	8.25134e-147	0.399923	0.562	0.299	1.65027e-143	5	Nr5a1
Prkacb	7.21988e-130	0.323518	0.945	0.899	1.44398e-126	5	Prkacb
Slit2	6.30854e-127	0.313747	0.653	0.44	1.26171e-123	5	Slit2
Tubb2a	3.3378e-126	0.334781	0.922	0.816	6.6756e-123	5	Tubb2a
Gria21	4.44378e-122	0.267934	0.994	0.97	8.88756e-119	5	Gria2
Itm2c	2.3083e-118	0.28108	0.977	0.936	4.6166e-115	5	Itm2c
Gap431	1.72689e-117	0.317893	0.892	0.75	3.45378e-114	5	Gap43
Pcsk2	1.1239e-116	0.270188	0.703	0.462	2.24779e-113	5	Pcsk2
Sema5a	3.71749e-113	0.351155	0.6	0.368	7.43498e-110	5	Sema5a
Hsp90ab1	3.95663e-111	0.265295	0.989	0.972	7.91326e-108	5	Hsp90ab1
Gaa	5.51319e-110	0.291666	0.959	0.912	1.10264e-106	5	Gaa
Uchl1	5.06988e-107	0.26033	0.969	0.928	1.01398e-103	5	Uchl1
Bex2	1.1292e-106	0.274256	0.978	0.934	2.2584e-103	5	Bex2
Basp1	4.23979e-104	0.289497	0.917	0.83	8.47958e-101	5	Basp1
Vsnl1	6.50267e-104	0.295213	0.741	0.534	1.30053e-100	5	Vsnl1
Gabra11	4.95881e-100	0.259985	0.71	0.463	9.91762e-97	5	Gabra1
Gapdh	7.30245e-95	0.261138	0.981	0.955	1.46049e-91	5	Gapdh
Gm472831	1.72049e-90	0.30392	0.973	0.944	3.44097e-87	5	Gm47283
Acvr1c	4.64677e-85	0.261534	0.657	0.571	9.29354e-82	5	Acvr1c
Atp2b4	1.47751e-75	0.263906	0.718	0.589	2.95501e-72	5	Atp2b4
Epha51	4.28045e-64	0.356845	0.712	0.568	8.5609e-61	5	Epha5
Cadps2	2.44259e-48	0.314544	0.548	0.412	4.88518e-45	5	Cadps2
Nap1l5	0	0.619979	0.998	0.978	0	6	Nap1l5
Isl1	2.38811e-294	0.37345	0.812	0.598	4.77622e-291	6	Isl1
Snhg113	9.02128e-271	0.539596	1	0.994	1.80426e-267	6	Snhg11
Impact1	1.99612e-268	0.497952	0.97	0.876	3.99224e-265	6	Impact
Tmem130	1.05255e-210	0.433212	0.925	0.778	2.10509e-207	6	Tmem130
Ahi11	3.5352e-202	0.363363	0.998	0.985	7.0704e-199	6	Ahi1
Zdbf2	3.33886e-198	0.473518	0.865	0.659	6.67773e-195	6	Zdbf2
Peg31	9.8468e-193	0.374448	0.991	0.973	1.96936e-189	6	Peg3
Resp18	2.75957e-188	0.454528	0.865	0.7	5.51915e-185	6	Resp18
Ncald	6.06195e-184	0.489484	0.829	0.608	1.21239e-180	6	Ncald
Pam1	1.98161e-179	0.368175	0.894	0.722	3.96322e-176	6	Pam
Fstl51	1.49891e-178	0.35845	0.681	0.437	2.99781e-175	6	Fstl5
Zwint1	1.1382e-176	0.381887	0.977	0.94	2.27639e-173	6	Zwint
Ttc32	6.20533e-170	0.321561	0.999	0.995	1.24107e-166	6	Ttc3
C130073E24Rik1	9.44773e-159	0.340405	0.751	0.527	1.88955e-155	6	C130073E24Rik
Rtn11	1.61761e-158	0.327208	0.992	0.974	3.23523e-155	6	Rtn1
Dlx1	4.06933e-154	0.283048	0.567	0.308	8.13865e-151	6	Dlx1
Tac1	2.15914e-150	0.540557	0.801	0.732	4.31829e-147	6	Tac1
Irs4	4.43558e-150	0.302945	0.749	0.613	8.87116e-147	6	Irs4
Hap11	1.9427e-149	0.334773	0.981	0.941	3.8854e-146	6	Hap1
Ndn	4.63148e-134	0.48489	0.941	0.872	9.26296e-131	6	Ndn
Meg33	1.38959e-131	0.353927	1	0.996	2.77917e-128	6	Meg3
Gaa1	3.51252e-130	0.305202	0.965	0.912	7.02503e-127	6	Gaa
Tenm11	2.48777e-127	0.316818	0.767	0.563	4.97555e-124	6	Tenm1
Tubb2a1	2.96369e-116	0.317103	0.915	0.816	5.92739e-113	6	Tubb2a
Gpr101	2.41432e-114	0.39831	0.683	0.495	4.82863e-111	6	Gpr101
Opcml2	7.28165e-113	0.263038	0.779	0.559	1.45633e-109	6	Opcml
Gnas	1.15772e-110	0.278443	0.994	0.983	2.31544e-107	6	Gnas
Chgb	7.23733e-109	0.350857	0.767	0.596	1.44747e-105	6	Chgb
Gap432	1.05586e-106	0.30322	0.885	0.75	2.11173e-103	6	Gap43
Bex21	4.8934e-104	0.281085	0.971	0.934	9.78681e-101	6	Bex2
Pcdh17	1.16582e-102	0.337841	0.817	0.677	2.33164e-99	6	Pcdh17
Gpx3	1.90846e-100	0.291027	0.787	0.611	3.81692e-97	6	Gpx3
Pcdh7	2.47e-99	0.290836	0.871	0.764	4.93999e-96	6	Pcdh7
Uchl11	1.20046e-98	0.274754	0.967	0.928	2.40093e-95	6	Uchl1
Scg2	2.00638e-95	0.353478	0.898	0.81	4.01276e-92	6	Scg2
Gabra12	4.24271e-93	0.252843	0.685	0.465	8.48542e-90	6	Gabra1
Rab3c1	1.81196e-92	0.334646	0.913	0.834	3.62393e-89	6	Rab3c
Ubb1	1.20215e-90	0.252957	0.973	0.958	2.4043e-87	6	Ubb
Gad21	2.05316e-89	0.417261	0.746	0.629	4.10632e-86	6	Gad2
Rmst	1.04878e-87	0.257935	0.626	0.437	2.09756e-84	6	Rmst
Syn22	1.64342e-81	0.276864	0.844	0.699	3.28683e-78	6	Syn2
Miat	8.24043e-81	0.253128	0.777	0.622	1.64809e-77	6	Miat
Nrxn31	8.8087e-80	0.299912	0.843	0.713	1.76174e-76	6	Nrxn3
Pgrmc1	9.98746e-77	0.271525	0.952	0.907	1.99749e-73	6	Pgrmc1
Lsamp	4.87066e-73	0.25908	0.888	0.791	9.74133e-70	6	Lsamp
Tubb31	2.10482e-71	0.264223	0.784	0.617	4.20964e-68	6	Tubb3
Chl12	8.56047e-71	0.276233	0.668	0.489	1.71209e-67	6	Chl1
Syt4	5.20283e-70	0.26208	0.883	0.778	1.04057e-66	6	Syt4
Hpcal1	9.21174e-69	0.304609	0.55	0.368	1.84235e-65	6	Hpcal1
Gad11	1.08826e-61	0.251945	0.685	0.519	2.17653e-58	6	Gad1
Ntng11	2.34366e-50	0.300479	0.628	0.529	4.68731e-47	6	Ntng1
Gabrq	1.8443e-43	0.251772	0.618	0.517	3.6886e-40	6	Gabrq
Hs6st2	2.47191e-42	0.262977	0.598	0.469	4.94381e-39	6	Hs6st2
Vgf	5.86899e-23	0.280278	0.55	0.475	1.1738e-19	6	Vgf
Nts	2.66683e-15	0.335796	0.376	0.316	5.33367e-12	6	Nts
Gal	0.00957648	0.348507	0.335	0.229	1	6	Gal
Atp1a21	0	2.11064	0.995	0.671	0	7	Atp1a2
Gm37641	0	2.10203	0.967	0.505	0	7	Gm3764
Itih31	0	2.09664	0.901	0.377	0	7	Itih3
Apoe1	0	1.91288	0.999	0.803	0	7	Apoe
Agt1	0	1.82342	0.893	0.398	0	7	Agt
Sparcl11	0	1.75114	0.973	0.658	0	7	Sparcl1
Bcan1	0	1.69208	0.93	0.464	0	7	Bcan
Slc1a21	0	1.68033	0.995	0.813	0	7	Slc1a2
Ntsr21	0	1.67211	0.932	0.377	0	7	Ntsr2
Slc6a111	0	1.59918	0.871	0.435	0	7	Slc6a11
Slc1a31	0	1.54039	0.893	0.472	0	7	Slc1a3
Cst32	0	1.46513	0.999	0.93	0	7	Cst3
Slc4a41	0	1.45462	0.914	0.472	0	7	Slc4a4
Plpp31	0	1.40423	0.921	0.533	0	7	Plpp3
Ndrg21	0	1.32472	0.954	0.646	0	7	Ndrg2
Ttyh11	0	1.30689	0.903	0.565	0	7	Ttyh1
Fgfr31	0	1.2184	0.797	0.372	0	7	Fgfr3
Ptch11	0	1.09868	0.829	0.507	0	7	Ptch1
Ntrk21	0	1.08551	0.973	0.85	0	7	Ntrk2
Malat1	0	1.08073	1	1	0	7	Malat1
Mt11	0	0.992939	0.822	0.56	0	7	Mt1
Htra11	0	0.983722	0.797	0.319	0	7	Htra1
S1pr11	0	0.92951	0.803	0.391	0	7	S1pr1
Timp31	0	0.915624	0.789	0.458	0	7	Timp3
Mmd21	0	0.913913	0.799	0.402	0	7	Mmd2
Mfge81	0	0.905841	0.708	0.32	0	7	Mfge8
Sparc1	0	0.881566	0.902	0.664	0	7	Sparc
Ednrb1	0	0.845799	0.767	0.38	0	7	Ednrb
Nwd11	0	0.768116	0.775	0.329	0	7	Nwd1
Grk31	0	0.760146	0.818	0.565	0	7	Grk3
Phkg1	0	0.665503	0.77	0.381	0	7	Phkg1
Atp13a4	0	0.658409	0.717	0.445	0	7	Atp13a4
Lrig1	0	0.596964	0.751	0.332	0	7	Lrig1
Mlc11	0	0.582979	0.721	0.336	0	7	Mlc1
Plce1	0	0.573064	0.762	0.359	0	7	Plce1
Prodh	0	0.488815	0.734	0.392	0	7	Prodh
Ccdc141	0	0.399389	0.768	0.528	0	7	Ccdc141
Il18	0	0.386731	0.695	0.321	0	7	Il18
Id3	0	0.371726	0.781	0.493	0	7	Id3
Fam228b	0	0.331832	0.704	0.368	0	7	Fam228b
Gm266	0	0.294443	0.715	0.386	0	7	Gm266
Vcam1	0	0.286526	0.728	0.338	0	7	Vcam1
Son1	7.23286e-308	0.883625	0.973	0.883	1.44657e-304	7	Son
Rapgef3	2.9181e-301	0.391911	0.729	0.458	5.83621e-298	7	Rapgef3
Acsbg1	3.33774e-297	0.432445	0.663	0.302	6.67548e-294	7	Acsbg1
Scd21	7.53492e-293	0.667848	0.967	0.839	1.50698e-289	7	Scd2
Luzp2	3.74638e-292	0.498702	0.763	0.438	7.49277e-289	7	Luzp2
Ttll3	6.41746e-288	0.619254	0.73	0.503	1.28349e-284	7	Ttll3
Tril1	1.11229e-287	0.716717	0.708	0.402	2.22457e-284	7	Tril
Aldoc1	1.92977e-282	0.814177	0.875	0.641	3.85953e-279	7	Aldoc
Gjb6	2.66655e-279	0.735566	0.669	0.311	5.3331e-276	7	Gjb6
Gpr37l11	2.6475e-277	1.1226	0.729	0.416	5.295e-274	7	Gpr37l1
Ckb1	1.17234e-275	0.661721	0.992	0.923	2.34468e-272	7	Ckb
Gpld11	2.94165e-272	0.672797	0.671	0.307	5.88331e-269	7	Gpld1
Paqr61	3.07948e-256	0.539653	0.674	0.357	6.15897e-253	7	Paqr6
Lfng	1.22762e-254	0.42834	0.644	0.364	2.45524e-251	7	Lfng
Acsl31	1.59501e-253	0.78253	0.8	0.48	3.19001e-250	7	Acsl3
Nrarp	4.83769e-245	0.346211	0.639	0.345	9.67537e-242	7	Nrarp
Itpkb	5.15526e-243	0.345413	0.651	0.305	1.03105e-239	7	Itpkb
Clu1	1.26107e-232	0.743284	0.866	0.7	2.52215e-229	7	Clu
Cyp2d22	7.78947e-229	0.350621	0.648	0.383	1.55789e-225	7	Cyp2d22
Zfp36l2	4.99215e-225	0.426703	0.667	0.362	9.9843e-222	7	Zfp36l2
5031439G07Rik1	2.61133e-224	0.705173	0.787	0.52	5.22267e-221	7	5031439G07Rik
Ptprz11	3.31396e-224	0.75103	0.858	0.652	6.62791e-221	7	Ptprz1
Kcnj101	1.80358e-219	0.529426	0.739	0.422	3.60717e-216	7	Kcnj10
Slc7a111	8.15822e-218	0.723583	0.668	0.395	1.63164e-214	7	Slc7a11
Utp14b	1.23368e-216	0.455783	0.687	0.4	2.46736e-213	7	Utp14b
Id21	2.66761e-213	0.587519	0.709	0.449	5.33522e-210	7	Id2
Mt21	8.70564e-213	0.661535	0.716	0.411	1.74113e-209	7	Mt2
Prex2	2.73739e-212	0.544266	0.697	0.43	5.47477e-209	7	Prex2
Cd38	1.6851e-208	0.364361	0.601	0.316	3.3702e-205	7	Cd38
Acss1	5.08714e-208	0.384538	0.626	0.359	1.01743e-204	7	Acss1
Glul1	2.42994e-203	0.760264	0.792	0.59	4.85988e-200	7	Glul
Abca1	1.05348e-200	0.361631	0.693	0.495	2.10696e-197	7	Abca1
Ramp1	1.19046e-183	0.421468	0.701	0.476	2.38093e-180	7	Ramp1
Cbs	7.68309e-181	0.385636	0.619	0.416	1.53662e-177	7	Cbs
Rgma	2.03961e-174	0.486867	0.676	0.473	4.07921e-171	7	Rgma
Sfxn5	2.73322e-171	0.437898	0.669	0.388	5.46645e-168	7	Sfxn5
Trps1	3.46355e-166	0.406099	0.709	0.512	6.92711e-163	7	Trps1
Bcl2	1.36651e-164	0.305918	0.687	0.458	2.73301e-161	7	Bcl2
Macf1	1.08507e-162	0.670337	0.955	0.897	2.17014e-159	7	Macf1
Plcd4	8.8402e-158	0.339797	0.62	0.38	1.76804e-154	7	Plcd4
Myo10	3.75749e-156	0.394164	0.697	0.513	7.51498e-153	7	Myo10
Cep85l	9.7365e-148	0.363351	0.609	0.362	1.9473e-144	7	Cep85l
Nnat	8.73371e-144	0.438852	0.939	0.797	1.74674e-140	7	Nnat
mt-Co13	1.10183e-141	0.334914	1	1	2.20365e-138	7	mt-Co1
Gja11	2.77476e-140	0.948213	0.634	0.393	5.54953e-137	7	Gja1
Qk1	2.89712e-137	0.68154	0.686	0.487	5.79423e-134	7	Qk
Slc6a13	5.96431e-137	0.770747	0.688	0.508	1.19286e-133	7	Slc6a1
Sdc41	5.97276e-132	0.533734	0.582	0.339	1.19455e-128	7	Sdc4
Slc7a101	1.2116e-130	0.904985	0.606	0.342	2.4232e-127	7	Slc7a10
Aqp4	4.13225e-128	0.619985	0.595	0.37	8.26449e-125	7	Aqp4
Slc25a18	1.84419e-126	0.385813	0.52	0.268	3.68837e-123	7	Slc25a18
Atp1b21	2.32672e-125	0.809743	0.646	0.425	4.65344e-122	7	Atp1b2
Fzd2	2.50981e-124	0.294073	0.576	0.403	5.01963e-121	7	Fzd2
Msi2	2.25072e-123	0.580565	0.805	0.661	4.50143e-120	7	Msi2
Btbd17	3.74225e-122	0.3285	0.565	0.352	7.4845e-119	7	Btbd17
Plxnb1	1.36732e-121	0.417441	0.666	0.491	2.73465e-118	7	Plxnb1
Cd81	2.34952e-121	0.505495	0.852	0.729	4.69905e-118	7	Cd81
Etnppl1	8.45418e-119	0.834292	0.568	0.306	1.69084e-115	7	Etnppl
Wnt7b	2.34942e-117	0.25507	0.617	0.441	4.69884e-114	7	Wnt7b
Spon1	7.2937e-109	0.352599	0.627	0.425	1.45874e-105	7	Spon1
Serpine21	4.10292e-107	0.472468	0.691	0.488	8.20583e-104	7	Serpine2
Nkain41	1.07323e-106	0.536715	0.555	0.346	2.14646e-103	7	Nkain4
Ptn	1.42361e-100	0.296349	0.751	0.483	2.84721e-97	7	Ptn
Fut91	6.37007e-100	0.372285	0.698	0.456	1.27401e-96	7	Fut9
Gpm6b1	3.99063e-98	0.459258	0.74	0.568	7.98126e-95	7	Gpm6b
mt-Nd32	3.68374e-96	0.392496	0.901	0.788	7.36747e-93	7	mt-Nd3
Pitpnc1	1.72315e-93	0.483819	0.736	0.541	3.4463e-90	7	Pitpnc1
Timp4	9.20525e-93	0.399334	0.513	0.305	1.84105e-89	7	Timp4
Entpd2	1.45543e-87	0.274489	0.219	0.266	2.91085e-84	7	Entpd2
Slc27a1	6.37121e-87	0.623198	0.555	0.383	1.27424e-83	7	Slc27a1
Paqr8	1.28655e-85	0.386615	0.526	0.314	2.57309e-82	7	Paqr8
mt-Nd23	3.23595e-84	0.300709	1	0.995	6.47191e-81	7	mt-Nd2
Tcf4	9.41626e-83	0.403617	0.81	0.668	1.88325e-79	7	Tcf4
Mt32	2.304e-79	0.356255	0.909	0.801	4.60799e-76	7	Mt3
Prdx6	6.01801e-71	0.499884	0.661	0.534	1.2036e-67	7	Prdx6
Hes51	1.25739e-67	0.866144	0.556	0.368	2.51478e-64	7	Hes5
Pbxip1	3.94376e-66	0.350119	0.628	0.483	7.88753e-63	7	Pbxip1
Mpp6	3.74075e-63	0.298089	0.601	0.436	7.4815e-60	7	Mpp6
Chpt1	1.53322e-62	0.295259	0.643	0.483	3.06645e-59	7	Chpt1
Pnisr	4.90687e-62	0.453512	0.911	0.869	9.81373e-59	7	Pnisr
Notch1	7.20392e-61	0.297814	0.569	0.476	1.44078e-57	7	Notch1
Myo6	1.35924e-58	0.327932	0.628	0.484	2.71847e-55	7	Myo6
Daam2	1.90536e-56	0.391921	0.525	0.351	3.81071e-53	7	Daam2
Zbtb20	6.66171e-55	0.343313	0.977	0.927	1.33234e-51	7	Zbtb20
mt-Nd53	9.26793e-53	0.289963	0.973	0.92	1.85359e-49	7	mt-Nd5
Srebf1	6.15514e-50	0.412098	0.584	0.476	1.23103e-46	7	Srebf1
Klf9	1.5521e-49	0.252171	0.702	0.599	3.1042e-46	7	Klf9
Cpe2	2.24008e-44	0.270881	0.959	0.892	4.48016e-41	7	Cpe
Sat1	8.83242e-44	0.445503	0.521	0.378	1.76648e-40	7	Sat1
mt-Nd4l3	1.21514e-41	0.25312	0.959	0.89	2.43027e-38	7	mt-Nd4l
Arhgef26	4.24868e-40	0.259831	0.308	0.408	8.49737e-37	7	Arhgef26
Trpm3	4.65075e-37	0.250621	0.539	0.438	9.30149e-34	7	Trpm3
Dbi1	3.95734e-35	0.323803	0.555	0.452	7.91468e-32	7	Dbi
Cyp2j9	4.76713e-34	0.290108	0.465	0.354	9.53425e-31	7	Cyp2j9
Ddhd1	5.88788e-29	0.504875	0.547	0.463	1.17758e-25	7	Ddhd1
Mfsd2a	5.56528e-28	0.279389	0.49	0.39	1.11306e-24	7	Mfsd2a
Sox9	1.56244e-27	0.326068	0.349	0.425	3.12488e-24	7	Sox9
Grin2c	3.26507e-26	0.416622	0.487	0.371	6.53013e-23	7	Grin2c
Slc39a12	1.59576e-22	0.347836	0.478	0.365	3.19152e-19	7	Slc39a12
Ntm1	2.36947e-19	0.305792	0.704	0.682	4.73895e-16	7	Ntm
Lgi4	5.16877e-18	0.266638	0.453	0.356	1.03375e-14	7	Lgi4
Nkx6-2	6.10215e-15	0.32851	0.278	0.23	1.22043e-11	7	Nkx6-2
Pla2g71	1.07468e-12	0.44628	0.463	0.296	2.14936e-09	7	Pla2g7
Sfrp5	1.98829e-12	0.331666	0.428	0.311	3.97658e-09	7	Sfrp5
Appl2	5.35344e-11	0.394898	0.375	0.44	1.07069e-07	7	Appl2
Adgrg1	4.21956e-09	0.403044	0.471	0.466	8.43911e-06	7	Adgrg1
Tlcd1	5.10159e-08	0.386962	0.412	0.321	0.000102032	7	Tlcd1
Gstm1	2.1008e-07	0.360379	0.405	0.398	0.00042016	7	Gstm1
Hepacam	2.50455e-07	0.510536	0.444	0.359	0.00050091	7	Hepacam
Cd63	7.63189e-07	0.303803	0.379	0.459	0.00152638	7	Cd63
Cldn10	1.2633e-06	0.291357	0.412	0.503	0.00252659	7	Cldn10
Cyp2j6	2.52034e-05	0.325164	0.389	0.303	0.0504068	7	Cyp2j6
Nfia1	3.20506e-05	0.274563	0.445	0.398	0.0641012	7	Nfia
Plp1	0	4.11535	1	0.457	0	8	Plp1
Ptgds	0	2.80399	0.944	0.548	0	8	Ptgds
Mal	0	2.45101	0.957	0.308	0	8	Mal
Trf	0	2.00362	0.913	0.279	0	8	Trf
Mbp	0	2.00101	0.959	0.501	0	8	Mbp
Neat1	0	1.98627	0.878	0.432	0	8	Neat1
Cnp	0	1.86005	0.91	0.361	0	8	Cnp
Mag	0	1.78176	0.887	0.318	0	8	Mag
Car2	0	1.75011	0.867	0.298	0	8	Car2
Cldn11	0	1.68659	0.896	0.291	0	8	Cldn11
Fth11	0	1.53563	0.999	0.943	0	8	Fth1
Scd22	0	1.47928	0.994	0.839	0	8	Scd2
Enpp2	0	1.47269	0.89	0.361	0	8	Enpp2
Mobp	0	1.47092	0.864	0.312	0	8	Mobp
Gatm	0	1.37988	0.8	0.375	0	8	Gatm
Tubb4a	0	1.26097	0.836	0.565	0	8	Tubb4a
Tspan2	0	1.24703	0.878	0.343	0	8	Tspan2
Glul2	0	1.23617	0.93	0.586	0	8	Glul
Qk2	0	1.20911	0.89	0.479	0	8	Qk
Stmn4	0	1.16355	0.916	0.578	0	8	Stmn4
Bin1	0	1.13404	0.855	0.623	0	8	Bin1
Sgk1	0	1.09119	0.785	0.332	0	8	Sgk1
Tmem88b	0	1.08174	0.816	0.342	0	8	Tmem88b
Phldb1	0	1.07898	0.861	0.442	0	8	Phldb1
Csrp1	0	1.06516	0.779	0.335	0	8	Csrp1
Apod	0	1.0573	0.775	0.276	0	8	Apod
Mog	0	1.02852	0.769	0.268	0	8	Mog
Gjc3	0	1.00256	0.809	0.407	0	8	Gjc3
Slc12a2	0	0.987461	0.837	0.467	0	8	Slc12a2
Zeb2	0	0.928311	0.794	0.384	0	8	Zeb2
Ugt8a	0	0.901709	0.761	0.279	0	8	Ugt8a
Malat11	0	0.861215	1	1	0	8	Malat1
Ermn	0	0.827146	0.758	0.236	0	8	Ermn
Ppp1cc	0	0.73399	0.867	0.397	0	8	Ppp1cc
Myo61	0	0.659666	0.858	0.475	0	8	Myo6
Wscd1	0	0.65642	0.81	0.322	0	8	Wscd1
Arhgap23	0	0.620496	0.829	0.387	0	8	Arhgap23
C030029H02Rik	0	0.606103	0.731	0.274	0	8	C030029H02Rik
Adipor2	0	0.593052	0.828	0.442	0	8	Adipor2
Plin4	0	0.573824	0.883	0.484	0	8	Plin4
Arhgef10	0	0.548014	0.814	0.374	0	8	Arhgef10
Myrf	0	0.546325	0.795	0.285	0	8	Myrf
Trim59	0	0.54584	0.765	0.309	0	8	Trim59
Daam21	0	0.539195	0.826	0.339	0	8	Daam2
Prr5l	0	0.518135	0.851	0.396	0	8	Prr5l
Sytl2	0	0.476575	0.833	0.328	0	8	Sytl2
Gab1	0	0.472225	0.8	0.345	0	8	Gab1
Cdk19	0	0.375908	0.841	0.469	0	8	Cdk19
Cpm	0	0.36259	0.801	0.301	0	8	Cpm
Adamts4	0	0.339613	0.794	0.316	0	8	Adamts4
Pde8a	0	0.338982	0.812	0.438	0	8	Pde8a
Car14	0	0.312935	0.8	0.323	0	8	Car14
Ppfibp2	0	0.305197	0.797	0.443	0	8	Ppfibp2
Dock1	0	0.284186	0.788	0.404	0	8	Dock1
Gm48678	0	0.267614	0.775	0.32	0	8	Gm48678
Gm28322	0	0.266414	0.741	0.369	0	8	Gm28322
Tjp2	0	0.266144	0.792	0.409	0	8	Tjp2
Hhip	0	0.263752	0.836	0.451	0	8	Hhip
Ppp1r16b	5.30888e-299	0.797061	0.785	0.398	1.06178e-295	8	Ppp1r16b
Carhsp1	1.28677e-294	0.464712	0.754	0.369	2.57354e-291	8	Carhsp1
Chn2	7.13613e-293	0.269999	0.785	0.372	1.42723e-289	8	Chn2
Gpm6b2	2.90095e-292	1.08634	0.833	0.565	5.80191e-289	8	Gpm6b
Gprc5b	2.5301e-291	0.558059	0.77	0.354	5.06021e-288	8	Gprc5b
Plekhb1	1.18832e-287	0.642611	0.793	0.332	2.37665e-284	8	Plekhb1
Slc38a2	4.96619e-286	0.82867	0.85	0.445	9.93238e-283	8	Slc38a2
Pllp	2.2482e-273	0.644019	0.715	0.295	4.4964e-270	8	Pllp
Otud7b	8.28127e-272	0.539043	0.792	0.459	1.65625e-268	8	Otud7b
Ccp110	2.60449e-271	0.748154	0.775	0.388	5.20898e-268	8	Ccp110
Hepacam1	2.18116e-264	0.573528	0.776	0.346	4.36232e-261	8	Hepacam
Rhou	6.30029e-262	0.569374	0.764	0.411	1.26006e-258	8	Rhou
Map7	5.72315e-260	0.821288	0.838	0.586	1.14463e-256	8	Map7
Lpar1	5.27438e-257	0.466192	0.72	0.358	1.05488e-253	8	Lpar1
Tmbim1	9.9174e-257	0.494058	0.732	0.354	1.98348e-253	8	Tmbim1
Ndrg1	1.66526e-256	0.707656	0.777	0.38	3.33051e-253	8	Ndrg1
Fa2h	2.32251e-251	0.569419	0.694	0.217	4.64502e-248	8	Fa2h
1700047M11Rik	8.89787e-249	0.561032	0.703	0.272	1.77957e-245	8	1700047M11Rik
2022-09-04	2.83616e-240	1.15168	0.73	0.388	5.67231e-237	8	2022-09-04
Aplp1	4.81685e-232	0.71536	0.936	0.788	9.63371e-229	8	Aplp1
Aatk	1.29726e-226	0.830811	0.862	0.558	2.59451e-223	8	Aatk
Kcna1	2.18875e-226	0.600248	0.746	0.45	4.3775e-223	8	Kcna1
Phlpp1	8.21494e-226	0.51217	0.73	0.378	1.64299e-222	8	Phlpp1
Kif13b	1.04919e-222	0.468827	0.729	0.423	2.09839e-219	8	Kif13b
Aspa	9.99659e-220	0.614855	0.67	0.264	1.99932e-216	8	Aspa
Gsn	1.25402e-217	0.804207	0.727	0.429	2.50803e-214	8	Gsn
Cers2	8.51642e-211	0.464393	0.766	0.45	1.70328e-207	8	Cers2
Fnbp1	8.66572e-210	0.645751	0.776	0.447	1.73314e-206	8	Fnbp1
Pip4k2a	4.37885e-206	0.547076	0.702	0.307	8.75769e-203	8	Pip4k2a
Cntn2	6.03178e-201	0.78706	0.744	0.425	1.20636e-197	8	Cntn2
Nfix	6.0811e-188	0.61704	0.751	0.471	1.21622e-184	8	Nfix
Ptma	7.37992e-187	0.756799	0.844	0.65	1.47598e-183	8	Ptma
Mast4	2.17868e-185	0.789851	0.797	0.542	4.35737e-182	8	Mast4
Ptprd	2.4712e-184	0.744404	0.849	0.562	4.9424e-181	8	Ptprd
Frmd4b	2.6213e-184	0.383061	0.685	0.382	5.2426e-181	8	Frmd4b
Inf2	1.84307e-183	0.386073	0.694	0.35	3.68615e-180	8	Inf2
Dock10	1.9263e-182	0.641735	0.755	0.527	3.85259e-179	8	Dock10
Etv1	1.95387e-181	0.40267	0.739	0.423	3.90775e-178	8	Etv1
Erbin	2.20975e-180	0.604444	0.736	0.413	4.4195e-177	8	Erbin
Abca2	4.14073e-176	0.808851	0.764	0.474	8.28146e-173	8	Abca2
S100a16	8.34922e-174	0.454774	0.686	0.338	1.66984e-170	8	S100a16
Plin3	1.966e-169	0.319118	0.677	0.436	3.93199e-166	8	Plin3
Phgdh	3.87941e-169	0.390604	0.658	0.312	7.75882e-166	8	Phgdh
Ttyh2	2.3428e-167	0.599566	0.675	0.355	4.6856e-164	8	Ttyh2
Edil3	1.87088e-160	0.647578	0.803	0.51	3.74177e-157	8	Edil3
Sec14l5	1.89137e-157	0.452354	0.647	0.377	3.78274e-154	8	Sec14l5
Slc24a21	5.74675e-156	0.653785	0.78	0.528	1.14935e-152	8	Slc24a2
Reep3	2.62499e-153	0.294091	0.692	0.38	5.24997e-150	8	Reep3
Prox1	8.35294e-153	0.382209	0.673	0.41	1.67059e-149	8	Prox1
Lgi3	1.07505e-152	0.710652	0.659	0.331	2.1501e-149	8	Lgi3
D16Ertd472e	1.15579e-151	0.348409	0.648	0.382	2.31158e-148	8	D16Ertd472e
Syt11	3.07881e-147	0.539031	0.996	0.964	6.15762e-144	8	Syt11
Plekhg3	3.11579e-146	0.326249	0.633	0.312	6.23158e-143	8	Plekhg3
Foxn3	7.78771e-145	0.54705	0.744	0.44	1.55754e-141	8	Foxn3
Kcnj102	1.47412e-141	0.429913	0.758	0.423	2.94823e-138	8	Kcnj10
Tsc22d4	6.56167e-138	0.582229	0.716	0.437	1.31233e-134	8	Tsc22d4
Clmn	7.84995e-135	0.541137	0.75	0.53	1.56999e-131	8	Clmn
Creb5	1.5957e-127	0.389618	0.624	0.282	3.19139e-124	8	Creb5
Unc5b	1.30457e-124	0.326869	0.681	0.541	2.60915e-121	8	Unc5b
Nfasc	1.72557e-122	0.590169	0.817	0.653	3.45113e-119	8	Nfasc
Psat1	3.30669e-120	0.466009	0.632	0.329	6.61339e-117	8	Psat1
Evi2a	1.06466e-118	0.415541	0.592	0.256	2.12932e-115	8	Evi2a
Tmem63a	7.97312e-116	0.595024	0.609	0.291	1.59462e-112	8	Tmem63a
Serinc5	8.97312e-109	0.346381	0.688	0.455	1.79462e-105	8	Serinc5
Cd811	9.78093e-108	0.512466	0.87	0.728	1.95619e-104	8	Cd81
Olig1	1.75933e-106	0.647415	0.639	0.314	3.51867e-103	8	Olig1
Il1rap	3.62932e-106	0.261452	0.716	0.54	7.25865e-103	8	Il1rap
mt-Co14	1.60194e-105	0.292492	1	1	3.20389e-102	8	mt-Co1
Secisbp2l	4.1193e-103	0.432093	0.696	0.467	8.23859e-100	8	Secisbp2l
Arrdc3	5.89663e-100	0.405082	0.617	0.333	1.17933e-96	8	Arrdc3
Pik3r1	3.99118e-90	0.362485	0.736	0.506	7.98237e-87	8	Pik3r1
Anln	1.05691e-89	0.322621	0.28	0.34	2.11382e-86	8	Anln
Litaf	6.40268e-89	0.436856	0.622	0.434	1.28054e-85	8	Litaf
Tmod1	4.04615e-84	0.295712	0.726	0.59	8.0923e-81	8	Tmod1
Tmeff21	7.23544e-80	0.393165	0.673	0.496	1.44709e-76	8	Tmeff2
Tnfaip6	5.49136e-79	0.293734	0.569	0.267	1.09827e-75	8	Tnfaip6
Zfp536	1.73068e-76	0.294279	0.632	0.435	3.46135e-73	8	Zfp536
Sox8	8.61067e-74	0.261825	0.6	0.381	1.72213e-70	8	Sox8
Tmsb4x	9.96578e-67	0.320037	0.99	0.948	1.99316e-63	8	Tmsb4x
Arap2	3.22873e-66	0.312634	0.666	0.513	6.45745e-63	8	Arap2
App1	1.79559e-65	0.320914	0.995	0.959	3.59118e-62	8	App
Cd9	1.66678e-63	0.255425	0.315	0.308	3.33356e-60	8	Cd9
Clic4	7.83262e-63	0.42078	0.56	0.292	1.56652e-59	8	Clic4
Ddr1	8.29929e-56	0.464096	0.619	0.448	1.65986e-52	8	Ddr1
Pcdh91	6.64045e-55	0.350003	0.8	0.628	1.32809e-51	8	Pcdh9
Qdpr	2.15348e-54	0.732818	0.574	0.359	4.30697e-51	8	Qdpr
Cryab	1.83557e-53	0.751855	0.568	0.246	3.67115e-50	8	Cryab
Dbi2	9.60947e-52	0.555334	0.587	0.451	1.92189e-48	8	Dbi
5031439G07Rik2	4.08629e-49	0.294205	0.734	0.524	8.17258e-46	8	5031439G07Rik
Hapln2	5.35384e-46	0.728704	0.545	0.271	1.07077e-42	8	Hapln2
Rnf13	2.90061e-45	0.294467	0.347	0.402	5.80121e-42	8	Rnf13
mt-Nd33	3.45006e-45	0.293872	0.89	0.79	6.90012e-42	8	mt-Nd3
Gng11	4.88684e-45	0.30846	0.31	0.293	9.77368e-42	8	Gng11
Nfia2	6.30132e-44	0.261487	0.615	0.391	1.26026e-40	8	Nfia
Slc44a1	7.77496e-42	0.425248	0.599	0.424	1.55499e-38	8	Slc44a1
Rpl30	3.86152e-41	0.277917	0.959	0.869	7.72303e-38	8	Rpl30
Actb	2.1018e-40	0.282871	0.999	0.98	4.20361e-37	8	Actb
Mt12	4.06496e-40	0.317499	0.714	0.566	8.12993e-37	8	Mt1
Tprn	3.51183e-34	0.272779	0.537	0.327	7.02366e-31	8	Tprn
Plcl1	1.89059e-33	0.369059	0.547	0.352	3.78118e-30	8	Plcl1
Il33	8.44626e-31	0.322771	0.344	0.247	1.68925e-27	8	Il33
Gna12	1.10562e-28	0.42136	0.573	0.41	2.21124e-25	8	Gna12
Galnt6	3.26563e-28	0.32358	0.354	0.26	6.53127e-25	8	Galnt6
Ppp1r14a	5.63334e-25	0.44923	0.367	0.242	1.12667e-21	8	Ppp1r14a
Cdc37l1	4.51135e-24	0.550018	0.606	0.588	9.0227e-21	8	Cdc37l1
Dst	5.60724e-24	0.265656	0.962	0.909	1.12145e-20	8	Dst
Ptn1	1.60732e-23	0.34946	0.597	0.491	3.21465e-20	8	Ptn
Smad7	2.03206e-21	0.280523	0.642	0.514	4.06412e-18	8	Smad7
Rab31	1.24662e-17	0.251093	0.347	0.326	2.49325e-14	8	Rab31
Plekhh1	1.83687e-17	0.411103	0.539	0.431	3.67375e-14	8	Plekhh1
Sirt2	8.61529e-15	0.345606	0.502	0.411	1.72306e-11	8	Sirt2
Gjc2	2.86153e-10	0.341673	0.513	0.425	5.72307e-07	8	Gjc2
Josd2	1.70983e-09	0.414765	0.406	0.362	3.41965e-06	8	Josd2
Pla2g16	4.14565e-08	0.378998	0.379	0.341	8.2913e-05	8	Pla2g16
Cmtm5	1.16185e-05	0.411058	0.378	0.241	0.023237	8	Cmtm5
Opalin	0.0016009	0.571345	0.424	0.322	1	8	Opalin
Ebf3	0	0.346238	0.92	0.379	0	9	Ebf3
Meg34	1.53927e-272	0.803573	1	0.996	3.07854e-269	9	Meg3
Nefm2	5.15364e-257	0.487231	0.858	0.395	1.03073e-253	9	Nefm
Rmst1	4.09594e-249	0.387552	0.903	0.432	8.19188e-246	9	Rmst
Col11a1	1.06862e-247	0.321626	0.872	0.531	2.13723e-244	9	Col11a1
Sim1	2.80953e-243	0.541811	0.751	0.299	5.61907e-240	9	Sim1
Htr2c1	1.21515e-178	0.266938	0.815	0.433	2.43029e-175	9	Htr2c
Snhg114	1.63753e-178	0.593594	1	0.994	3.27506e-175	9	Snhg11
Syt2	2.30606e-175	0.420273	0.74	0.399	4.61213e-172	9	Syt2
Spock11	3.19494e-174	0.393096	0.906	0.483	6.38988e-171	9	Spock1
Frmd4a	5.94713e-161	0.285445	0.918	0.627	1.18943e-157	9	Frmd4a
Pcsk21	9.36835e-160	0.457497	0.856	0.464	1.87367e-156	9	Pcsk2
Slc17a61	1.2599e-154	0.620112	0.826	0.569	2.5198e-151	9	Slc17a6
Cacna2d11	9.9401e-133	0.425745	0.927	0.675	1.98802e-129	9	Cacna2d1
Epha52	1.72506e-132	0.363048	0.919	0.565	3.45013e-129	9	Epha5
Gabra13	2.86923e-113	0.792703	0.758	0.469	5.73846e-110	9	Gabra1
Gnas1	8.31567e-110	0.390071	0.999	0.984	1.66313e-106	9	Gnas
Trh	8.4976e-109	1.36371	0.653	0.211	1.69952e-105	9	Trh
C230004F18Rik1	7.89907e-92	0.400803	0.923	0.726	1.57981e-88	9	C230004F18Rik
Miat1	7.97475e-91	0.376067	0.867	0.623	1.59495e-87	9	Miat
Thy11	2.39861e-85	0.504182	0.79	0.541	4.79722e-82	9	Thy1
Rtn12	8.98161e-85	0.328598	0.995	0.975	1.79632e-81	9	Rtn1
Elavl21	1.11016e-76	0.383583	0.781	0.492	2.22032e-73	9	Elavl2
Hsp90aa11	1.43762e-75	0.30361	0.991	0.98	2.87523e-72	9	Hsp90aa1
Onecut2	3.12911e-72	0.447611	0.54	0.2	6.25821e-69	9	Onecut2
Vsnl11	6.76553e-70	0.358701	0.809	0.538	1.35311e-66	9	Vsnl1
Nap1l51	4.00989e-67	0.28288	0.997	0.979	8.01979e-64	9	Nap1l5
Uchl12	1.06154e-64	0.29823	0.971	0.929	2.12307e-61	9	Uchl1
Lsamp1	7.31251e-59	0.31018	0.955	0.792	1.4625e-55	9	Lsamp
Peg32	1.50028e-57	0.265752	0.996	0.973	3.00056e-54	9	Peg3
Pvalb	3.02425e-56	0.308266	0.61	0.396	6.0485e-53	9	Pvalb
Stmn1	7.38008e-54	0.343992	0.91	0.816	1.47602e-50	9	Stmn1
Basp11	8.2138e-51	0.267593	0.927	0.833	1.64276e-47	9	Basp1
Atp1b12	7.95292e-47	0.33486	0.984	0.976	1.59058e-43	9	Atp1b1
Nrn1	3.73805e-46	0.609976	0.593	0.303	7.4761e-43	9	Nrn1
Snap252	2.09855e-45	0.288966	0.959	0.919	4.1971e-42	9	Snap25
Otp	9.08259e-42	0.351518	0.639	0.481	1.81652e-38	9	Otp
Sncb1	2.09446e-41	0.280004	0.747	0.483	4.18891e-38	9	Sncb
Resp181	1.16706e-40	0.250339	0.866	0.705	2.33413e-37	9	Resp18
Cplx11	1.54945e-40	0.521747	0.581	0.351	3.0989e-37	9	Cplx1
Sez6	1.27497e-37	0.251372	0.717	0.538	2.54993e-34	9	Sez6
Ncdn1	3.55467e-36	0.27693	0.773	0.63	7.10935e-33	9	Ncdn
Ndn1	1.44424e-27	0.40691	0.932	0.874	2.88848e-24	9	Ndn
Calb2	2.35644e-26	0.318545	0.689	0.417	4.71287e-23	9	Calb2
Pcp4	1.23211e-23	0.271562	0.746	0.626	2.46422e-20	9	Pcp4
Cbln11	5.45092e-19	0.313957	0.585	0.316	1.09018e-15	9	Cbln1
Unc13c	3.18823e-18	0.286882	0.594	0.438	6.37646e-15	9	Unc13c
Plp11	0	1.87018	0.999	0.463	0	10	Plp1
Ptgds1	0	1.5772	0.948	0.552	0	10	Ptgds
Mal1	0	1.26358	0.929	0.316	0	10	Mal
Mag1	0	0.956337	0.846	0.325	0	10	Mag
C030029H02Rik1	0	0.325071	0.801	0.276	0	10	C030029H02Rik
Plin41	0	0.28005	0.854	0.489	0	10	Plin4
Trf1	4.6528e-281	0.998119	0.831	0.289	9.30561e-278	10	Trf
Mbp1	3.64704e-273	0.838265	0.934	0.507	7.29408e-270	10	Mbp
Cnp1	1.28888e-272	0.876726	0.837	0.369	2.57777e-269	10	Cnp
Daam22	8.2968e-267	0.320923	0.823	0.344	1.65936e-263	10	Daam2
Cldn111	1.18653e-244	0.878369	0.801	0.3	2.37306e-241	10	Cldn11
Enpp21	7.57695e-244	0.745367	0.818	0.369	1.51539e-240	10	Enpp2
Scd23	3.27494e-225	0.733298	0.976	0.841	6.54988e-222	10	Scd2
Tmem63a1	2.30826e-208	0.365621	0.738	0.29	4.61652e-205	10	Tmem63a
Ppp1r16b1	2.59356e-206	0.479486	0.819	0.401	5.18712e-203	10	Ppp1r16b
Fth12	9.13186e-196	0.604119	0.999	0.943	1.82637e-192	10	Fth1
Qk3	8.82968e-193	0.613381	0.897	0.483	1.76594e-189	10	Qk
Tspan21	1.05792e-187	0.631238	0.764	0.353	2.11584e-184	10	Tspan2
Lgi31	1.71245e-176	0.549614	0.767	0.332	3.42489e-173	10	Lgi3
Neat11	2.16589e-176	0.881798	0.771	0.44	4.33178e-173	10	Neat1
Apod1	6.94225e-170	0.495033	0.734	0.283	1.38845e-166	10	Apod
Gjc31	2.65768e-165	0.471966	0.763	0.413	5.31536e-162	10	Gjc3
Mobp1	1.32544e-163	0.695965	0.792	0.32	2.65088e-160	10	Mobp
Car21	1.29885e-158	0.750403	0.741	0.308	2.59771e-155	10	Car2
Pllp1	1.23293e-156	0.35085	0.704	0.3	2.46586e-153	10	Pllp
Kcna11	4.05717e-156	0.327566	0.779	0.453	8.11434e-153	10	Kcna1
Tubb4a1	3.11494e-154	0.607941	0.865	0.567	6.22988e-151	10	Tubb4a
Slc12a21	2.67624e-149	0.550448	0.78	0.473	5.35248e-146	10	Slc12a2
Ptprd1	2.58062e-141	0.4913	0.897	0.564	5.16123e-138	10	Ptprd
Clmn1	3.99764e-140	0.355191	0.828	0.53	7.99528e-137	10	Clmn
Myrf1	9.25772e-140	0.281603	0.681	0.294	1.85154e-136	10	Myrf
Glul3	4.74605e-137	0.558286	0.897	0.59	9.49209e-134	10	Glul
Ndrg11	9.53584e-137	0.351857	0.763	0.385	1.90717e-133	10	Ndrg1
Malat12	6.23006e-134	0.435789	1	1	1.24601e-130	10	Malat1
Pip4k2a1	6.82331e-134	0.379888	0.72	0.311	1.36466e-130	10	Pip4k2a
Pde4b	7.39357e-132	0.287931	0.84	0.589	1.47871e-128	10	Pde4b
Ccp1101	1.86837e-131	0.444315	0.743	0.393	3.73675e-128	10	Ccp110
Stmn41	1.73276e-130	0.492279	0.862	0.584	3.46552e-127	10	Stmn4
Mast41	4.35823e-129	0.452901	0.826	0.544	8.71647e-126	10	Mast4
Ermn1	1.56082e-125	0.439295	0.673	0.245	3.12164e-122	10	Ermn
Slc24a22	1.85887e-124	0.433168	0.831	0.529	3.71774e-121	10	Slc24a2
Foxn31	9.27652e-123	0.360858	0.775	0.442	1.8553e-119	10	Foxn3
Litaf1	1.98316e-121	0.27158	0.71	0.434	3.96631e-118	10	Litaf
Zeb21	3.67283e-114	0.403816	0.722	0.391	7.34566e-111	10	Zeb2
Gpm6b3	2.67469e-109	0.518153	0.858	0.567	5.34939e-106	10	Gpm6b
Carhsp11	5.32998e-109	0.268914	0.69	0.375	1.066e-105	10	Carhsp1
Tmem88b1	2.01409e-105	0.531272	0.68	0.351	4.02818e-102	10	Tmem88b
Abca21	4.68934e-105	0.438366	0.785	0.476	9.37867e-102	10	Abca2
Secisbp2l1	9.68194e-102	0.284365	0.762	0.468	1.93639e-98	10	Secisbp2l
Dock101	1.87944e-101	0.323177	0.773	0.529	3.75887e-98	10	Dock10
Nfix1	1.49896e-99	0.264491	0.787	0.472	2.99792e-96	10	Nfix
Bin11	9.00569e-99	0.461705	0.878	0.625	1.80114e-95	10	Bin1
1941-09-01	5.73397e-93	0.587772	0.695	0.393	1.14679e-89	10	2022-09-04
Tsc22d41	6.20646e-93	0.322521	0.748	0.439	1.24129e-89	10	Tsc22d4
Gatm1	2.89566e-91	0.604243	0.7	0.382	5.79132e-88	10	Gatm
Trim591	1.08526e-90	0.258778	0.64	0.318	2.17052e-87	10	Trim59
Nfasc1	3.93612e-88	0.34874	0.861	0.653	7.87224e-85	10	Nfasc
Map71	1.5823e-86	0.328517	0.828	0.589	3.16459e-83	10	Map7
Fnbp11	1.93575e-86	0.311736	0.753	0.451	3.8715e-83	10	Fnbp1
Aatk1	6.10769e-85	0.4413	0.803	0.563	1.22154e-81	10	Aatk
Ttyh21	2.53003e-82	0.353221	0.65	0.359	5.06007e-79	10	Ttyh2
Mog1	8.06898e-77	0.507462	0.637	0.278	1.6138e-73	10	Mog
Wscd11	1.70442e-76	0.319589	0.65	0.332	3.40883e-73	10	Wscd1
Aplp11	3.16546e-76	0.375038	0.922	0.79	6.33091e-73	10	Aplp1
Ddr11	7.26643e-72	0.259237	0.707	0.447	1.45329e-68	10	Ddr1
Phlpp11	1.1512e-68	0.250714	0.659	0.384	2.30241e-65	10	Phlpp1
Arhgef101	1.81244e-65	0.304627	0.641	0.384	3.62489e-62	10	Arhgef10
Ptma1	2.68848e-65	0.355309	0.859	0.652	5.37695e-62	10	Ptma
Ugt8a1	4.23287e-61	0.436583	0.612	0.289	8.46575e-58	10	Ugt8a
Cdc37l11	1.93756e-59	0.294725	0.809	0.582	3.87512e-56	10	Cdc37l1
Gsn1	2.78168e-55	0.370764	0.651	0.435	5.56336e-52	10	Gsn
Syt111	3.09349e-55	0.314072	0.996	0.965	6.18699e-52	10	Syt11
Tmbim11	1.06446e-54	0.270695	0.633	0.362	2.12892e-51	10	Tmbim1
Cd812	7.33282e-51	0.305786	0.87	0.73	1.46656e-47	10	Cd81
App2	1.07826e-50	0.266841	0.978	0.96	2.15652e-47	10	App
Edil31	5.48095e-48	0.3275	0.737	0.515	1.09619e-44	10	Edil3
Cers21	3.98062e-47	0.269446	0.661	0.457	7.96124e-44	10	Cers2
Aspa1	6.45478e-46	0.284895	0.575	0.271	1.29096e-42	10	Aspa
Sgk11	9.93734e-45	0.440277	0.632	0.342	1.98747e-41	10	Sgk1
Qdpr1	1.58212e-43	0.396361	0.646	0.359	3.16424e-40	10	Qdpr
Phldb11	6.78652e-43	0.46342	0.646	0.454	1.3573e-39	10	Phldb1
Cd91	1.0311e-42	0.278281	0.572	0.299	2.0622e-39	10	Cd9
Slc38a21	1.49426e-41	0.347879	0.69	0.455	2.98852e-38	10	Slc38a2
Hepacam2	7.9132e-41	0.335368	0.614	0.355	1.58264e-37	10	Hepacam
Olig11	6.50009e-39	0.330026	0.602	0.319	1.30002e-35	10	Olig1
Cntn21	4.73646e-37	0.395948	0.627	0.432	9.47291e-34	10	Cntn2
Cryab1	6.87098e-36	0.492221	0.592	0.249	1.3742e-32	10	Cryab
Gprc5b1	1.19002e-35	0.327085	0.594	0.364	2.38005e-32	10	Gprc5b
Plekhb11	1.25074e-35	0.250285	0.59	0.343	2.50148e-32	10	Plekhb1
Otud7b1	7.78424e-35	0.268523	0.649	0.467	1.55685e-31	10	Otud7b
Pex5l	1.78467e-30	0.331026	0.602	0.397	3.56934e-27	10	Pex5l
Adipor21	2.91445e-30	0.267411	0.626	0.452	5.8289e-27	10	Adipor2
Csrp11	3.32922e-28	0.409796	0.615	0.345	6.65844e-25	10	Csrp1
Erbin1	1.09652e-26	0.275648	0.619	0.42	2.19304e-23	10	Erbin
Actb1	2.89965e-26	0.250308	0.992	0.981	5.79931e-23	10	Actb
Rnf131	1.18869e-23	0.250617	0.584	0.394	2.37739e-20	10	Rnf13
Hapln21	1.57857e-22	0.254287	0.383	0.279	3.15713e-19	10	Hapln2
Arhgap231	1.75592e-20	0.272147	0.588	0.399	3.51184e-17	10	Arhgap23
Opalin1	1.32001e-19	0.266897	0.388	0.325	2.64002e-16	10	Opalin
Ppp1cc1	2.75186e-17	0.27863	0.573	0.411	5.50373e-14	10	Ppp1cc
Plekhh11	0.00406838	0.284946	0.449	0.435	1	10	Plekhh1
Pdgfra	0	1.7574	0.907	0.368	0	11	Pdgfra
Ptprz12	0	1.4731	0.961	0.652	0	11	Ptprz1
Matn4	0	1.45186	0.891	0.408	0	11	Matn4
Vcan	0	1.38874	0.895	0.516	0	11	Vcan
Olig12	0	1.30228	0.84	0.312	0	11	Olig1
Cspg5	0	1.18038	0.925	0.666	0	11	Cspg5
Cspg4	0	1.1748	0.878	0.372	0	11	Cspg4
Gpr17	0	1.03934	0.837	0.432	0	11	Gpr17
Tnr	0	0.998875	0.867	0.457	0	11	Tnr
Sema3d	0	0.535378	0.764	0.388	0	11	Sema3d
Itga9	0	0.408341	0.751	0.354	0	11	Itga9
Sapcd2	0	0.351011	0.688	0.172	0	11	Sapcd2
Cacng4	2.16214e-307	0.801043	0.839	0.417	4.32428e-304	11	Cacng4
Epn2	2.18664e-306	1.02913	0.842	0.439	4.37327e-303	11	Epn2
Xylt1	3.7836e-289	0.757988	0.812	0.507	7.5672e-286	11	Xylt1
Pcdh15	1.09155e-270	0.858752	0.801	0.42	2.18311e-267	11	Pcdh15
Tmem100	6.52987e-268	0.395484	0.699	0.32	1.30597e-264	11	Tmem100
Bcan2	9.8379e-262	0.999677	0.853	0.474	1.96758e-258	11	Bcan
Sox6	3.53727e-257	0.625593	0.759	0.41	7.07453e-254	11	Sox6
Gjc32	2.58113e-255	0.824256	0.781	0.412	5.16226e-252	11	Gjc3
Sema5b	8.83117e-241	0.300407	0.7	0.384	1.76623e-237	11	Sema5b
Sulf2	3.98313e-239	0.800798	0.781	0.489	7.96627e-236	11	Sulf2
Sox81	1.3118e-229	0.504098	0.71	0.38	2.6236e-226	11	Sox8
Abhd2	2.05091e-229	0.462744	0.742	0.426	4.10182e-226	11	Abhd2
Bcas1	3.05003e-229	0.459938	0.714	0.303	6.10006e-226	11	Bcas1
Kank1	1.23646e-224	0.435307	0.709	0.409	2.47291e-221	11	Kank1
Ptn2	1.68897e-215	0.915039	0.836	0.485	3.37795e-212	11	Ptn
Cald1	1.58815e-213	0.315074	0.747	0.416	3.17629e-210	11	Cald1
Nfia3	7.92632e-197	0.540801	0.765	0.389	1.58526e-193	11	Nfia
Neu4	6.50037e-196	0.657483	0.682	0.338	1.30007e-192	11	Neu4
Gm37642	1.06175e-185	0.678694	0.827	0.517	2.12351e-182	11	Gm3764
Traf4	2.30723e-184	0.46443	0.656	0.333	4.61446e-181	11	Traf4
Pou3f1	8.6461e-182	0.311355	0.673	0.363	1.72922e-178	11	Pou3f1
Gpc5	1.34273e-173	0.259001	0.677	0.416	2.68546e-170	11	Gpc5
3110035E14Rik	3.55406e-173	0.465057	0.652	0.323	7.10813e-170	11	3110035E14Rik
Mfsd2a1	9.47604e-164	0.443989	0.678	0.385	1.89521e-160	11	Mfsd2a
Serpine22	1.26548e-163	0.833398	0.764	0.489	2.53095e-160	11	Serpine2
Marcks	6.48742e-161	0.666873	0.871	0.666	1.29748e-157	11	Marcks
Hip1	3.20106e-156	0.488032	0.756	0.539	6.40212e-153	11	Hip1
Sh3bp4	3.39178e-150	0.312915	0.632	0.368	6.78357e-147	11	Sh3bp4
Malat13	8.40376e-149	0.505126	1	1	1.68075e-145	11	Malat1
Fabp7	2.45524e-147	0.302553	0.585	0.263	4.91048e-144	11	Fabp7
Pou3f3	9.26742e-147	0.284999	0.715	0.468	1.85348e-143	11	Pou3f3
Lims2	1.19726e-146	0.346181	0.648	0.41	2.39451e-143	11	Lims2
Qk4	1.52251e-146	0.606402	0.821	0.486	3.04501e-143	11	Qk
Chd7	8.2189e-145	0.327595	0.7	0.455	1.64378e-141	11	Chd7
Nfix2	3.77386e-142	0.359668	0.752	0.474	7.54772e-139	11	Nfix
Tcf41	7.66265e-137	0.637531	0.877	0.668	1.53253e-133	11	Tcf4
Opcml3	1.82348e-135	0.629469	0.83	0.565	3.64696e-132	11	Opcml
Cd813	3.59879e-133	0.639126	0.89	0.729	7.19758e-130	11	Cd81
Mir9-3hg	9.34673e-133	0.358212	0.642	0.37	1.86935e-129	11	Mir9-3hg
Etv4	3.31023e-131	0.3353	0.607	0.302	6.62045e-128	11	Etv4
Pik3r11	2.59393e-130	0.45036	0.772	0.507	5.18787e-127	11	Pik3r1
Lrp1b	1.56823e-124	0.476445	0.846	0.604	3.13646e-121	11	Lrp1b
Atp1a22	7.89345e-118	0.400544	0.923	0.678	1.57869e-114	11	Atp1a2
Col11a2	9.51979e-114	0.37257	0.604	0.313	1.90396e-110	11	Col11a2
Sash1	1.72527e-112	0.264775	0.65	0.353	3.45054e-109	11	Sash1
Phldb12	2.91608e-110	0.469481	0.71	0.452	5.83215e-107	11	Phldb1
Serinc51	1.2612e-107	0.304568	0.678	0.458	2.52239e-104	11	Serinc5
Svil	4.11061e-105	0.263871	0.621	0.431	8.22123e-102	11	Svil
Ncald1	3.71848e-104	0.485042	0.86	0.614	7.43696e-101	11	Ncald
Rpl132	8.4927e-103	0.436602	0.992	0.976	1.69854e-99	11	Rpl13
Ccnd1	1.97147e-100	0.495902	0.612	0.327	3.94293e-97	11	Ccnd1
Hes52	3.41717e-95	0.525217	0.637	0.369	6.83433e-92	11	Hes5
Prex1	1.65073e-92	0.307778	0.601	0.311	3.30145e-89	11	Prex1
Arhgap31	3.0449e-92	0.467527	0.627	0.421	6.08979e-89	11	Arhgap31
Olig2	3.39078e-90	0.686436	0.603	0.332	6.78156e-87	11	Olig2
Emid1	2.29664e-89	0.269604	0.6	0.468	4.59327e-86	11	Emid1
Ednrb2	4.53211e-88	0.281036	0.649	0.39	9.06421e-85	11	Ednrb
Rgcc	1.72369e-82	0.369589	0.599	0.431	3.44738e-79	11	Rgcc
Brinp31	1.1396e-81	0.341852	0.697	0.468	2.2792e-78	11	Brinp3
Scrg1	3.80717e-79	0.324661	0.571	0.348	7.61434e-76	11	Scrg1
Apoe2	6.24281e-79	0.282391	0.953	0.808	1.24856e-75	11	Apoe
Dbi3	2.75498e-73	0.499803	0.692	0.449	5.50997e-70	11	Dbi
Timp32	7.50763e-70	0.261843	0.678	0.467	1.50153e-66	11	Timp3
Zeb22	8.62986e-69	0.304327	0.622	0.394	1.72597e-65	11	Zeb2
Slc6a14	1.96073e-68	0.347887	0.751	0.509	3.92146e-65	11	Slc6a1
Tril2	1.13293e-67	0.357586	0.612	0.41	2.26585e-64	11	Tril
Kcnip3	1.50692e-66	0.481667	0.603	0.424	3.01384e-63	11	Kcnip3
Gria31	6.17938e-62	0.356721	0.792	0.65	1.23588e-58	11	Gria3
S100a1	1.05134e-59	0.41566	0.496	0.267	2.10268e-56	11	S100a1
Ckb2	4.45785e-59	0.326841	0.976	0.925	8.91569e-56	11	Ckb
Son2	2.02659e-54	0.341039	0.949	0.885	4.05317e-51	11	Son
Zcchc24	8.74256e-54	0.401395	0.526	0.296	1.74851e-50	11	Zcchc24
Gria22	2.7826e-52	0.315918	0.993	0.971	5.5652e-49	11	Gria2
Nfib	3.38552e-51	0.310576	0.661	0.486	6.77105e-48	11	Nfib
Gpm6b4	5.28792e-48	0.413451	0.729	0.572	1.05758e-44	11	Gpm6b
Megf111	3.83902e-47	0.393878	0.569	0.374	7.67804e-44	11	Megf11
Gpr37l12	4.25732e-47	0.546219	0.61	0.425	8.51463e-44	11	Gpr37l1
Nxph1	1.54169e-46	0.324336	0.649	0.517	3.08337e-43	11	Nxph1
Actb2	4.43266e-45	0.324106	0.995	0.98	8.86531e-42	11	Actb
Syt112	4.50046e-45	0.297821	0.99	0.965	9.00093e-42	11	Syt11
Cyp2j61	1.45535e-38	0.273765	0.508	0.301	2.91069e-35	11	Cyp2j6
Chpt11	4.59082e-31	0.318925	0.604	0.487	9.18164e-28	11	Chpt1
C1ql1	3.64704e-25	0.578067	0.507	0.347	7.29407e-22	11	C1ql1
Ramp11	5.32671e-25	0.300372	0.589	0.483	1.06534e-21	11	Ramp1
Itpr2	1.14162e-22	0.321403	0.537	0.439	2.28324e-19	11	Itpr2
Sox10	1.57806e-14	0.376794	0.419	0.255	3.15613e-11	11	Sox10
Pllp2	9.12736e-11	0.374621	0.451	0.308	1.82547e-07	11	Pllp
Tubb2b1	4.72649e-10	0.302157	0.568	0.517	9.45297e-07	11	Tubb2b
Caskin2	5.28771e-09	0.301868	0.458	0.351	1.05754e-05	11	Caskin2
Snx22	2.25362e-06	0.315301	0.443	0.323	0.00450725	11	Snx22
Zfp36l1	5.66218e-06	0.354274	0.442	0.329	0.0113244	11	Zfp36l1
Cd92	0.000494708	0.3936	0.427	0.304	0.989416	11	Cd9
Gm2a	0.00069321	0.324151	0.472	0.407	1	11	Gm2a
S100a161	0.00415263	0.281353	0.466	0.349	1	11	S100a16
Susd5	0.00656231	0.251066	0.413	0.312	1	11	Susd5
Itgb8	0.00920759	0.268111	0.459	0.408	1	11	Itgb8
Snhg115	5.91908e-257	0.760959	0.996	0.994	1.18382e-253	12	Snhg11
Cited1	3.92082e-167	0.683195	0.712	0.518	7.84163e-164	12	Cited1
Gabrg1	7.50888e-107	0.400241	0.71	0.502	1.50178e-103	12	Gabrg1
Plagl1	2.95957e-104	0.627457	0.648	0.547	5.91914e-101	12	Plagl1
Gm472832	3.06376e-102	0.570797	0.958	0.945	6.12752e-99	12	Gm47283
Serpina3n	6.77577e-97	0.452491	0.579	0.475	1.35515e-93	12	Serpina3n
Gpx31	2.39147e-95	0.516292	0.769	0.618	4.78294e-92	12	Gpx3
Prlr	7.53203e-91	0.592407	0.684	0.577	1.50641e-87	12	Prlr
Ly6h1	1.21417e-87	0.388636	0.985	0.966	2.42834e-84	12	Ly6h
Zdbf21	1.00755e-85	0.510976	0.775	0.67	2.01511e-82	12	Zdbf2
Dlk1	3.85861e-84	0.517994	0.738	0.604	7.71723e-81	12	Dlk1
Gnas2	2.09308e-82	0.398697	0.994	0.984	4.18615e-79	12	Gnas
Ptprn	8.85191e-82	0.43217	0.862	0.767	1.77038e-78	12	Ptprn
Asb4	8.21572e-80	0.840038	0.642	0.597	1.64314e-76	12	Asb4
Kcnq1ot12	1.12342e-78	0.399857	0.964	0.961	2.24684e-75	12	Kcnq1ot1
Peg33	4.81463e-74	0.351801	0.984	0.974	9.62926e-71	12	Peg3
Irs41	1.71777e-73	0.576464	0.657	0.62	3.43554e-70	12	Irs4
Rab3c2	4.37943e-73	0.452932	0.902	0.837	8.75886e-70	12	Rab3c
Gaa2	8.43967e-73	0.355893	0.952	0.914	1.68793e-69	12	Gaa
Resp182	1.32477e-65	0.506773	0.786	0.708	2.64954e-62	12	Resp18
Hap12	8.26335e-61	0.323167	0.965	0.943	1.65267e-57	12	Hap1
Ndn2	1.38578e-58	0.431916	0.896	0.876	2.77157e-55	12	Ndn
Isl11	1.12518e-54	0.437922	0.646	0.611	2.25036e-51	12	Isl1
Vgf1	4.76963e-54	0.673125	0.56	0.477	9.53926e-51	12	Vgf
Nap1l52	2.11652e-53	0.281244	0.989	0.979	4.23303e-50	12	Nap1l5
Pomc	1.93863e-50	2.91281	0.54	0.564	3.87726e-47	12	Pomc
Maged11	5.95262e-50	0.272905	0.965	0.948	1.19052e-46	12	Maged1
Rnf128	8.01984e-49	0.439331	0.584	0.565	1.60397e-45	12	Rnf128
Acvr1c1	1.89919e-47	0.258891	0.568	0.577	3.79837e-44	12	Acvr1c
Tbx3	1.11026e-46	0.541158	0.596	0.661	2.22052e-43	12	Tbx3
Hs6st21	2.08915e-46	0.3624	0.576	0.475	4.17831e-43	12	Hs6st2
Alcam	7.14261e-45	0.275123	0.683	0.56	1.42852e-41	12	Alcam
Cartpt	9.76955e-44	1.24329	0.577	0.568	1.95391e-40	12	Cartpt
Ptprz13	2.12945e-43	0.317462	0.743	0.659	4.2589e-40	12	Ptprz1
Pgrmc11	3.4547e-43	0.284077	0.927	0.91	6.9094e-40	12	Pgrmc1
Peg10	2.30962e-42	0.283159	0.529	0.481	4.61923e-39	12	Peg10
Gpr1011	8.73513e-42	0.430822	0.554	0.505	1.74703e-38	12	Gpr101
Atp1a11	1.44141e-41	0.342182	0.813	0.772	2.88283e-38	12	Atp1a1
Bex22	8.02881e-41	0.267745	0.944	0.937	1.60576e-37	12	Bex2
Calb11	8.53926e-40	0.274534	0.598	0.493	1.70785e-36	12	Calb1
Tenm12	8.76759e-38	0.323992	0.622	0.575	1.75352e-34	12	Tenm1
Sv2c	1.09775e-37	0.359227	0.579	0.598	2.19551e-34	12	Sv2c
Dgkk	1.52952e-37	0.334661	0.44	0.396	3.05904e-34	12	Dgkk
Ecel1	2.18955e-35	0.409117	0.583	0.581	4.37909e-32	12	Ecel1
Pcdh71	6.1908e-35	0.347425	0.746	0.772	1.23816e-31	12	Pcdh7
Miat2	5.931e-34	0.332197	0.686	0.63	1.1862e-30	12	Miat
Unc5d1	8.72291e-32	0.344471	0.636	0.637	1.74458e-28	12	Unc5d
Kcnk2	5.53241e-31	0.25788	0.474	0.421	1.10648e-27	12	Kcnk2
Scn9a	5.53484e-31	0.348801	0.6	0.611	1.10697e-27	12	Scn9a
Tmem35a1	2.01517e-30	0.3603	0.588	0.579	4.03034e-27	12	Tmem35a
Arhgap6	9.86985e-30	0.288378	0.572	0.559	1.97397e-26	12	Arhgap6
Atp2b1	1.21515e-24	0.297163	0.734	0.742	2.43029e-21	12	Atp2b1
Ppp1r9a	1.38455e-24	0.286698	0.733	0.741	2.7691e-21	12	Ppp1r9a
Npy1r	1.50955e-23	0.496253	0.495	0.548	3.0191e-20	12	Npy1r
Prune2	9.59606e-19	0.283398	0.525	0.538	1.91921e-15	12	Prune2
Gabre	7.77191e-12	0.366475	0.462	0.536	1.55438e-08	12	Gabre
Rbms3	3.015e-10	0.311752	0.56	0.653	6.03001e-07	12	Rbms3
Crabp1	4.24498e-06	0.674122	0.458	0.571	0.00848997	12	Crabp1
Vgll3	1.62702e-05	0.458273	0.437	0.535	0.0325404	12	Vgll3
Cldn5	0	2.13201	0.933	0.354	0	13	Cldn5
Slco1a4	0	1.96713	0.928	0.316	0	13	Slco1a4
Flt1	0	1.93878	0.93	0.339	0	13	Flt1
Rgs5	0	1.86412	0.922	0.351	0	13	Rgs5
Bsg	0	1.75435	0.98	0.746	0	13	Bsg
Pltp	0	1.32542	0.896	0.297	0	13	Pltp
Vtn	0	1.26922	0.861	0.358	0	13	Vtn
Ptprb	0	1.23954	0.867	0.354	0	13	Ptprb
Slc2a1	0	1.14184	0.845	0.331	0	13	Slc2a1
Slc7a5	0	1.08145	0.868	0.352	0	13	Slc7a5
Slco1c1	0	1.07988	0.846	0.383	0	13	Slco1c1
Id1	0	1.06899	0.86	0.401	0	13	Id1
Esam	0	0.942043	0.881	0.415	0	13	Esam
Abcb1a	0	0.930026	0.854	0.312	0	13	Abcb1a
Itga1	0	0.793217	0.837	0.443	0	13	Itga1
Id31	0	0.764693	0.871	0.498	0	13	Id3
Pecam1	0	0.682179	0.822	0.349	0	13	Pecam1
Ctla2a	0	0.674201	0.839	0.367	0	13	Ctla2a
Car4	0	0.612801	0.871	0.33	0	13	Car4
Emcn	0	0.606366	0.817	0.319	0	13	Emcn
Sema7a	0	0.598826	0.824	0.338	0	13	Sema7a
Prom1	0	0.565222	0.814	0.347	0	13	Prom1
Mgp	0	0.545739	0.852	0.493	0	13	Mgp
Ushbp1	0	0.479364	0.836	0.495	0	13	Ushbp1
Txnip	0	0.440307	0.844	0.398	0	13	Txnip
Slc40a1	0	0.432147	0.832	0.426	0	13	Slc40a1
Vwf	0	0.409872	0.824	0.46	0	13	Vwf
Cspg41	0	0.379207	0.844	0.376	0	13	Cspg4
AU021092	0	0.378748	0.834	0.291	0	13	AU021092
Abcc9	0	0.371887	0.865	0.364	0	13	Abcc9
Stard8	0	0.307013	0.863	0.392	0	13	Stard8
Slc16a4	0	0.292461	0.856	0.372	0	13	Slc16a4
Kdr	6.53885e-305	0.47447	0.793	0.227	1.30777e-301	13	Kdr
Jcad	1.79358e-297	0.677553	0.821	0.42	3.58717e-294	13	Jcad
Arpc1b	8.40551e-297	0.450817	0.82	0.407	1.6811e-293	13	Arpc1b
Ly6a	4.47162e-294	1.05258	0.814	0.318	8.94325e-291	13	Ly6a
Cfh	5.59166e-293	0.286752	0.788	0.283	1.11833e-289	13	Cfh
Cxcl12	6.51214e-289	1.10853	0.81	0.334	1.30243e-285	13	Cxcl12
St6galnac2	2.37204e-286	0.278587	0.774	0.296	4.74408e-283	13	St6galnac2
Acvrl1	9.65328e-286	0.590855	0.8	0.339	1.93066e-282	13	Acvrl1
Adgrl4	8.48155e-283	0.667284	0.789	0.29	1.69631e-279	13	Adgrl4
Zic2	3.13855e-281	0.272259	0.769	0.22	6.27711e-278	13	Zic2
Egfl7	3.23571e-281	1.19423	0.834	0.385	6.47142e-278	13	Egfl7
Sult1a1	5.15924e-281	0.336963	0.812	0.412	1.03185e-277	13	Sult1a1
Nes	2.28759e-279	0.43849	0.796	0.401	4.57518e-276	13	Nes
Paqr5	2.51136e-278	0.392108	0.783	0.327	5.02271e-275	13	Paqr5
Tgfbr2	2.42322e-277	0.317464	0.82	0.52	4.84644e-274	13	Tgfbr2
Nostrin	2.33032e-275	0.471461	0.791	0.367	4.66064e-272	13	Nostrin
Epas1	1.54609e-273	0.954189	0.807	0.314	3.09217e-270	13	Epas1
Pear1	2.18594e-270	0.320381	0.773	0.359	4.37187e-267	13	Pear1
Slc38a3	1.81357e-268	0.42293	0.813	0.373	3.62715e-265	13	Slc38a3
Higd1b	1.60901e-266	0.310629	0.765	0.288	3.21801e-263	13	Higd1b
Fcgrt	1.04916e-265	0.522328	0.77	0.254	2.09831e-262	13	Fcgrt
Sema3c	1.67748e-264	0.665537	0.795	0.331	3.35497e-261	13	Sema3c
Cnn2	3.89662e-264	0.338388	0.784	0.377	7.79324e-261	13	Cnn2
Utrn	1.72629e-263	0.804909	0.853	0.396	3.45259e-260	13	Utrn
Heg1	2.32732e-263	0.524017	0.791	0.365	4.65464e-260	13	Heg1
Pglyrp1	6.95094e-257	0.826512	0.786	0.378	1.39019e-253	13	Pglyrp1
Inf21	5.03405e-250	0.34916	0.814	0.353	1.00681e-246	13	Inf2
Itih5	1.38698e-237	0.677583	0.796	0.386	2.77396e-234	13	Itih5
Ebf1	2.91698e-233	0.667423	0.77	0.305	5.83397e-230	13	Ebf1
Timp33	1.04202e-230	0.880272	0.888	0.463	2.08404e-227	13	Timp3
Ets1	9.699e-230	0.440733	0.757	0.318	1.9398e-226	13	Ets1
Rasgrp3	8.05121e-229	0.3693	0.769	0.415	1.61024e-225	13	Rasgrp3
Arhgap29	1.26549e-228	0.607398	0.777	0.397	2.53099e-225	13	Arhgap29
Gng111	1.64355e-226	0.553853	0.768	0.282	3.2871e-223	13	Gng11
Ahnak	6.92321e-224	0.823035	0.799	0.49	1.38464e-220	13	Ahnak
Cp	6.30521e-221	0.390236	0.769	0.445	1.26104e-217	13	Cp
Ccdc1411	7.59061e-220	0.790623	0.811	0.533	1.51812e-216	13	Ccdc141
Igfbp7	8.43764e-215	0.708116	0.751	0.342	1.68753e-211	13	Igfbp7
Rbpms	1.75479e-212	0.402246	0.754	0.399	3.50959e-209	13	Rbpms
Arhgap311	1.03227e-211	0.514176	0.779	0.419	2.06453e-208	13	Arhgap31
Adgrf5	6.91003e-208	0.658284	0.767	0.41	1.38201e-204	13	Adgrf5
Anxa3	1.38746e-207	0.265635	0.75	0.376	2.77492e-204	13	Anxa3
Hip11	4.83135e-202	0.442793	0.845	0.538	9.6627e-199	13	Hip1
Sparc2	9.96507e-201	0.919439	0.931	0.669	1.99301e-197	13	Sparc
Lsr	6.11235e-200	0.394434	0.738	0.395	1.22247e-196	13	Lsr
Zfp36l11	3.30547e-197	0.545812	0.766	0.322	6.61094e-194	13	Zfp36l1
Syne2	4.27771e-195	0.314913	0.8	0.457	8.55541e-192	13	Syne2
Gata2	6.5344e-195	0.277699	0.731	0.383	1.30688e-191	13	Gata2
Sparcl12	5.21083e-190	0.853845	0.94	0.667	1.04217e-186	13	Sparcl1
Ptn3	5.83697e-187	0.979769	0.868	0.487	1.16739e-183	13	Ptn
Atp1a23	1.05339e-182	1.01339	0.948	0.679	2.10678e-179	13	Atp1a2
Mfsd2a2	2.27218e-182	0.406744	0.762	0.385	4.54436e-179	13	Mfsd2a
Igf1r	2.48632e-182	1.00272	0.793	0.439	4.97263e-179	13	Igf1r
Pdgfrb	1.11049e-181	0.582677	0.756	0.431	2.22099e-178	13	Pdgfrb
Degs2	1.96848e-180	0.26215	0.724	0.398	3.93697e-177	13	Degs2
Slc1a22	1.34064e-179	0.867635	0.983	0.817	2.68127e-176	13	Slc1a2
Myl12a	7.45921e-179	0.397863	0.726	0.341	1.49184e-175	13	Myl12a
Mylk	7.77624e-178	0.293734	0.724	0.353	1.55525e-174	13	Mylk
Gjc1	1.74733e-177	0.316256	0.701	0.308	3.49467e-174	13	Gjc1
Prex21	3.00644e-173	0.418318	0.794	0.434	6.01289e-170	13	Prex2
Mecom	2.32925e-170	0.323118	0.714	0.369	4.6585e-167	13	Mecom
Nfib1	3.39639e-165	0.532701	0.84	0.483	6.79278e-162	13	Nfib
Apoe3	3.26745e-158	0.71282	0.987	0.808	6.53491e-155	13	Apoe
Cgnl1	1.13541e-157	0.382506	0.705	0.314	2.27082e-154	13	Cgnl1
Myo101	3.95887e-156	0.445769	0.805	0.515	7.91775e-153	13	Myo10
Gatm2	2.75882e-149	0.577524	0.768	0.383	5.51763e-146	13	Gatm
Fn1	5.1449e-149	0.705069	0.722	0.421	1.02898e-145	13	Fn1
St8sia4	5.09253e-148	0.461691	0.792	0.445	1.01851e-144	13	St8sia4
Tie1	1.00838e-144	0.336216	0.678	0.259	2.01677e-141	13	Tie1
Foxq1	6.87146e-140	0.342858	0.696	0.424	1.37429e-136	13	Foxq1
Ly6c1	8.51461e-140	1.04664	0.7	0.301	1.70292e-136	13	Ly6c1
Itm2a	2.46532e-138	1.17748	0.715	0.38	4.93064e-135	13	Itm2a
Zic11	1.10491e-134	0.304185	0.706	0.237	2.20981e-131	13	Zic1
Tcf42	5.98773e-133	0.693224	0.919	0.669	1.19755e-129	13	Tcf4
Hba-a2	5.01956e-132	1.34374	0.673	0.285	1.00391e-128	13	Hba-a2
Tsc22d3	9.93865e-132	0.395405	0.751	0.319	1.98773e-128	13	Tsc22d3
Eng	2.4137e-131	0.770695	0.693	0.329	4.8274e-128	13	Eng
Cd34	1.39592e-130	0.410382	0.697	0.437	2.79184e-127	13	Cd34
Abhd21	6.58844e-129	0.477726	0.733	0.428	1.31769e-125	13	Abhd2
H2-D1	1.62223e-128	0.48049	0.736	0.374	3.24447e-125	13	H2-D1
Hspb1	9.76173e-128	0.377945	0.68	0.369	1.95235e-124	13	Hspb1
Hmcn1	2.95009e-127	0.490403	0.705	0.491	5.90018e-124	13	Hmcn1
Golim4	2.06307e-124	0.372405	0.705	0.417	4.12615e-121	13	Golim4
Lamb2	4.09047e-123	0.509311	0.71	0.418	8.18095e-120	13	Lamb2
Clic1	3.78037e-121	0.30032	0.675	0.363	7.56074e-118	13	Clic1
Cst33	1.86938e-120	0.549355	0.995	0.932	3.73876e-117	13	Cst3
Clic41	1.30806e-119	0.417263	0.684	0.293	2.61613e-116	13	Clic4
Vwa1	1.73025e-118	0.477269	0.664	0.281	3.46049e-115	13	Vwa1
Lmo2	3.36012e-117	0.317603	0.684	0.344	6.72025e-114	13	Lmo2
Malat14	3.59399e-115	0.498976	1	1	7.18799e-112	13	Malat1
Adgre5	2.92822e-113	0.341124	0.664	0.369	5.85644e-110	13	Adgre5
Tagln2	1.13542e-112	0.296064	0.686	0.43	2.27085e-109	13	Tagln2
Rgs12	1.43296e-109	0.39782	0.715	0.451	2.86593e-106	13	Rgs12
Rrbp1	3.25676e-108	0.384632	0.799	0.498	6.51352e-105	13	Rrbp1
Cdh5	6.47952e-108	0.262938	0.66	0.388	1.2959e-104	13	Cdh5
Abcg2	1.66386e-104	0.615613	0.68	0.433	3.32772e-101	13	Abcg2
Vim	7.49821e-104	0.467913	0.734	0.549	1.49964e-100	13	Vim
Qk5	3.99882e-101	0.494194	0.843	0.488	7.99764e-98	13	Qk
Ndrg22	6.14804e-99	0.557205	0.893	0.655	1.22961e-95	13	Ndrg2
Mt22	2.74695e-93	0.386601	0.755	0.418	5.49391e-90	13	Mt2
Tmsb4x1	3.12001e-92	0.4912	0.987	0.949	6.24002e-89	13	Tmsb4x
Lef1	3.94935e-88	0.361217	0.675	0.495	7.8987e-85	13	Lef1
Itga6	1.5487e-87	0.371303	0.702	0.451	3.0974e-84	13	Itga6
Neat12	1.57039e-87	0.368801	0.729	0.444	3.14078e-84	13	Neat1
Gstm11	2.95722e-86	0.389438	0.735	0.39	5.91444e-83	13	Gstm1
Ndufa4l2	4.61925e-85	0.264895	0.624	0.307	9.23849e-82	13	Ndufa4l2
mt-Co15	1.80153e-84	0.368029	1	1	3.60306e-81	13	mt-Co1
Cald11	1.90784e-83	0.665161	0.68	0.42	3.81568e-80	13	Cald1
Mfge82	1.45773e-82	0.393614	0.671	0.33	2.91547e-79	13	Mfge8
Tm4sf1	7.49195e-82	0.400854	0.615	0.292	1.49839e-78	13	Tm4sf1
Tns1	1.81017e-81	0.543834	0.656	0.431	3.62034e-78	13	Tns1
Selenop	6.17323e-81	0.606484	0.644	0.302	1.23465e-77	13	Selenop
Robo4	1.95124e-79	0.309426	0.61	0.264	3.90248e-76	13	Robo4
Nfia4	4.63953e-78	0.327821	0.722	0.393	9.27906e-75	13	Nfia
mt-Nd24	3.62032e-77	0.413387	1	0.995	7.24064e-74	13	mt-Nd2
Ptgds2	7.07031e-75	0.414104	0.808	0.558	1.41406e-71	13	Ptgds
Notch3	4.76542e-73	0.255054	0.607	0.309	9.53083e-70	13	Notch3
Nbl1	1.31076e-72	0.254418	0.644	0.438	2.62153e-69	13	Nbl1
Glul4	5.76034e-71	0.518043	0.84	0.594	1.15207e-67	13	Glul
S1pr12	1.17522e-70	0.352269	0.683	0.404	2.35044e-67	13	S1pr1
Kitl	4.31833e-69	0.501974	0.649	0.433	8.63667e-66	13	Kitl
Cyyr1	2.22256e-67	0.390051	0.605	0.299	4.44512e-64	13	Cyyr1
Actb3	5.91259e-64	0.467604	0.997	0.98	1.18252e-60	13	Actb
Sorbs21	9.81083e-64	0.350912	0.849	0.659	1.96217e-60	13	Sorbs2
Slfn5	3.87066e-63	0.289457	0.607	0.361	7.74132e-60	13	Slfn5
Ifitm3	5.15444e-63	0.39343	0.603	0.321	1.03089e-59	13	Ifitm3
H2-K1	1.76717e-62	0.39778	0.643	0.417	3.53434e-59	13	H2-K1
Apod2	1.84951e-61	0.522979	0.612	0.289	3.69902e-58	13	Apod
Arap21	9.21335e-60	0.299648	0.696	0.515	1.84267e-56	13	Arap2
Cpe3	6.95064e-59	0.384339	0.966	0.894	1.39013e-55	13	Cpe
Hba-a1	1.72826e-53	1.55273	0.605	0.361	3.45651e-50	13	Hba-a1
Zbtb201	1.88964e-53	0.428995	0.979	0.929	3.77929e-50	13	Zbtb20
Gpm6b5	1.80426e-52	0.385975	0.809	0.571	3.60852e-49	13	Gpm6b
Ndrg12	2.01287e-47	0.359935	0.636	0.39	4.02573e-44	13	Ndrg1
Crip1	5.02717e-47	0.345937	0.617	0.483	1.00543e-43	13	Crip1
Hbb-bs	7.13137e-47	2.15604	0.605	0.386	1.42627e-43	13	Hbb-bs
Mt13	2.96342e-46	0.377447	0.798	0.567	5.92684e-43	13	Mt1
Slc4a42	2.81167e-45	0.254676	0.739	0.486	5.62334e-42	13	Slc4a4
B2m	5.78428e-45	0.377772	0.638	0.43	1.15686e-41	13	B2m
Son3	1.12618e-42	0.34026	0.96	0.885	2.25237e-39	13	Son
Msi21	1.89193e-42	0.32162	0.832	0.664	3.78386e-39	13	Msi2
Slc1a32	4.60103e-41	0.352357	0.704	0.487	9.20205e-38	13	Slc1a3
Pcp4l1	6.01641e-38	0.33284	0.611	0.436	1.20328e-34	13	Pcp4l1
Rpl18a1	6.35404e-34	0.303332	0.916	0.83	1.27081e-30	13	Rpl18a
Hbb-bt	4.1811e-33	0.848451	0.539	0.313	8.3622e-30	13	Hbb-bt
Macf11	3.05937e-32	0.29854	0.953	0.898	6.11873e-29	13	Macf1
Podxl	4.30872e-30	0.422744	0.589	0.454	8.61744e-27	13	Podxl
Tek	1.40122e-27	0.273877	0.544	0.342	2.80243e-24	13	Tek
mt-Nd34	3.94247e-24	0.271006	0.91	0.791	7.88493e-21	13	mt-Nd3
Clu2	9.55081e-23	0.277899	0.818	0.705	1.91016e-19	13	Clu
Aldoc2	4.09792e-22	0.251347	0.789	0.648	8.19583e-19	13	Aldoc
Pitpnc11	4.77661e-22	0.282322	0.686	0.547	9.55323e-19	13	Pitpnc1
Klf4	1.94542e-21	0.276889	0.544	0.398	3.89084e-18	13	Klf4
Bgn	8.35801e-21	0.276306	0.545	0.373	1.6716e-17	13	Bgn
Pmch	3.36088e-16	0.432909	0.276	0.315	6.72177e-13	13	Pmch
Klf2	4.04477e-10	0.458365	0.491	0.263	8.08954e-07	13	Klf2
Rasip1	4.02152e-09	0.31287	0.518	0.438	8.04304e-06	13	Rasip1
Ramp2	1.67612e-08	0.449267	0.495	0.327	3.35225e-05	13	Ramp2
Cavin1	1.11631e-07	0.305904	0.494	0.355	0.000223262	13	Cavin1
Atp13a5	1.72638e-07	0.432985	0.499	0.38	0.000345276	13	Atp13a5
Slc22a8	0.00819961	0.296703	0.424	0.369	1	13	Slc22a8
Prokr2	0	0.600025	0.907	0.403	0	14	Prokr2
Vipr2	0	0.549052	0.941	0.355	0	14	Vipr2
Rasd1	6.06079e-303	0.485865	0.887	0.433	1.21216e-299	14	Rasd1
Pbxip11	2.02945e-287	0.458359	0.975	0.478	4.0589e-284	14	Pbxip1
Syt10	8.36912e-284	0.427911	0.892	0.387	1.67382e-280	14	Syt10
Rora	3.10383e-280	1.30908	0.85	0.293	6.20766e-277	14	Rora
Sema3e	1.5292e-271	0.256646	0.895	0.585	3.0584e-268	14	Sema3e
Sox2	1.09038e-239	0.567172	0.944	0.41	2.18075e-236	14	Sox2
Chodl	6.98385e-235	0.287639	0.882	0.432	1.39677e-231	14	Chodl
Ddr12	2.31981e-227	0.263527	0.905	0.444	4.63962e-224	14	Ddr1
Cdc14a	4.08889e-227	0.474569	0.832	0.453	8.17778e-224	14	Cdc14a
Rorb	8.12641e-212	1.06163	0.846	0.449	1.62528e-208	14	Rorb
Nnat1	1.47416e-204	0.794479	0.989	0.799	2.94831e-201	14	Nnat
4930447C04Rik	1.80136e-188	0.354749	0.9	0.474	3.60272e-185	14	4930447C04Rik
Ndrg13	3.30347e-183	0.553401	0.856	0.385	6.60693e-180	14	Ndrg1
Vip	6.06567e-168	0.392059	0.759	0.346	1.21313e-164	14	Vip
Brinp32	1.89404e-161	0.265621	0.921	0.465	3.78809e-158	14	Brinp3
Auts2	5.88892e-146	0.405944	0.927	0.577	1.17778e-142	14	Auts2
Zic12	1.33053e-143	0.776133	0.713	0.237	2.66107e-140	14	Zic1
Six3	9.30971e-120	0.777805	0.794	0.489	1.86194e-116	14	Six3
Dlk11	1.32209e-117	0.616604	0.894	0.601	2.64418e-114	14	Dlk1
Snhg116	6.10016e-107	0.581284	1	0.994	1.22003e-103	14	Snhg11
Avp	1.27606e-104	1.61794	0.706	0.134	2.55211e-101	14	Avp
Pclo1	8.32764e-100	0.693356	0.99	0.827	1.66553e-96	14	Pclo
Vgf2	4.76911e-99	0.793576	0.784	0.472	9.53822e-96	14	Vgf
Scg21	1.12764e-97	0.666774	0.922	0.813	2.25527e-94	14	Scg2
Arhgap61	6.87198e-95	0.296055	0.9	0.551	1.3744e-91	14	Arhgap6
Peg34	1.1604e-85	0.492761	1	0.973	2.32079e-82	14	Peg3
Lcorl1	7.14752e-85	0.326677	0.873	0.557	1.4295e-81	14	Lcorl
Tshz21	4.60033e-82	0.251947	0.859	0.523	9.20065e-79	14	Tshz2
Col25a1	6.02548e-75	0.375028	0.79	0.454	1.2051e-71	14	Col25a1
Dner	3.16599e-66	0.566603	0.801	0.604	6.33198e-63	14	Dner
Rasgrf21	2.17912e-62	0.345579	0.835	0.5	4.35824e-59	14	Rasgrf2
Ogt	2.69913e-59	0.54339	0.823	0.653	5.39826e-56	14	Ogt
Malat15	9.98214e-58	0.259363	1	1	1.99643e-54	14	Malat1
Igfbp5	1.65114e-55	0.945783	0.664	0.317	3.30228e-52	14	Igfbp5
Itm2c1	1.07406e-51	0.324486	0.978	0.938	2.14812e-48	14	Itm2c
Meg35	1.97468e-51	0.364992	1	0.996	3.94935e-48	14	Meg3
Rpl361	1.63775e-48	0.369187	0.952	0.862	3.27551e-45	14	Rpl36
Srrm2	2.61433e-48	0.463263	0.993	0.95	5.22866e-45	14	Srrm2
Epha53	1.87826e-47	0.42298	0.801	0.572	3.75651e-44	14	Epha5
Ptprn1	4.28383e-47	0.445221	0.827	0.769	8.56766e-44	14	Ptprn
Snap253	3.70965e-43	0.361319	0.989	0.919	7.4193e-40	14	Snap25
Impact2	1.90901e-40	0.327347	0.969	0.88	3.81802e-37	14	Impact
Celf41	2.16692e-40	0.344526	0.99	0.937	4.33384e-37	14	Celf4
Hsp90ab11	4.94526e-38	0.296855	0.998	0.973	9.89052e-35	14	Hsp90ab1
Uchl13	1.24203e-35	0.331783	0.974	0.929	2.48405e-32	14	Uchl1
Ttc33	1.15773e-33	0.254837	1	0.996	2.31546e-30	14	Ttc3
Cnksr2	6.78423e-32	0.257385	0.683	0.45	1.35685e-28	14	Cnksr2
Gria23	1.84067e-28	0.273774	0.995	0.971	3.68134e-25	14	Gria2
Gad12	5.40517e-26	0.430321	0.713	0.525	1.08103e-22	14	Gad1
Map2	4.35033e-25	0.265414	0.992	0.947	8.70067e-22	14	Map2
Syn23	1.30767e-23	0.295792	0.821	0.705	2.61534e-20	14	Syn2
Msi22	1.21656e-22	0.361471	0.732	0.667	2.43313e-19	14	Msi2
Rps3a11	2.37215e-22	0.26914	0.861	0.833	4.74431e-19	14	Rps3a1
Cdh131	6.41309e-17	0.255386	0.659	0.455	1.28262e-13	14	Cdh13
Rgs16	1.85968e-15	0.483054	0.582	0.314	3.71936e-12	14	Rgs16
B3gat2	3.15349e-14	0.312799	0.584	0.38	6.30698e-11	14	B3gat2
Prex11	8.08122e-07	0.264926	0.414	0.318	0.00161624	14	Prex1
Six6	1.38427e-06	0.268046	0.408	0.344	0.00276853	14	Six6
C1ql3	2.49125e-06	0.420064	0.524	0.307	0.00498249	14	C1ql3
Hlf	2.76265e-05	0.383895	0.569	0.459	0.055253	14	Hlf
Arpp211	0	2.05972	0.906	0.699	0	15	Arpp21
Ppp3ca1	0	1.35297	0.973	0.88	0	15	Ppp3ca
Celf2	1.12629e-303	1.36031	0.921	0.791	2.25258e-300	15	Celf2
Meis2	8.64219e-268	1.63904	0.807	0.684	1.72844e-264	15	Meis2
Gria24	1.29301e-232	0.833516	0.998	0.971	2.58603e-229	15	Gria2
Pde10a	6.31495e-230	1.38902	0.748	0.551	1.26299e-226	15	Pde10a
Itm2c2	4.11598e-202	0.793226	0.984	0.938	8.23197e-199	15	Itm2c
Sez61	3.84253e-189	0.972742	0.712	0.541	7.68505e-186	15	Sez6
Atp2b11	3.80984e-187	0.956774	0.847	0.739	7.61968e-184	15	Atp2b1
Malat16	4.05883e-186	0.706819	1	1	8.11765e-183	15	Malat1
Alcam1	9.74221e-185	0.952978	0.774	0.558	1.94844e-181	15	Alcam
Camk2n1	1.1088e-167	0.894864	0.786	0.601	2.2176e-164	15	Camk2n1
Inf22	1.02798e-164	0.802886	0.526	0.36	2.05595e-161	15	Inf2
Crym	9.77909e-155	1.3202	0.71	0.713	1.95582e-151	15	Crym
Gad22	4.60451e-149	0.782626	0.832	0.632	9.20902e-146	15	Gad2
Gpr88	5.61136e-144	1.08454	0.637	0.56	1.12227e-140	15	Gpr88
Bcl11b	1.45841e-141	1.10349	0.699	0.681	2.91682e-138	15	Bcl11b
Pcp41	4.88642e-133	0.793944	0.776	0.627	9.77283e-130	15	Pcp4
Cplx21	5.77819e-132	0.861893	0.754	0.683	1.15564e-128	15	Cplx2
Ppp1r1b	1.1789e-123	1.14189	0.64	0.629	2.3578e-120	15	Ppp1r1b
Grm51	9.36029e-122	0.718323	0.733	0.608	1.87206e-118	15	Grm5
Mef2c	3.83441e-115	0.869984	0.629	0.57	7.66883e-112	15	Mef2c
Synpr	6.66223e-106	0.421041	0.362	0.32	1.33245e-102	15	Synpr
Lmo41	2.39553e-105	0.818242	0.628	0.584	4.79107e-102	15	Lmo4
Syt12	1.00443e-103	0.513534	0.946	0.872	2.00885e-100	15	Syt1
Camkv1	3.78397e-103	0.687618	0.716	0.653	7.56793e-100	15	Camkv
Ncdn2	2.65539e-100	0.649434	0.735	0.632	5.31079e-97	15	Ncdn
Meg36	1.47244e-97	0.56728	1	0.996	2.94489e-94	15	Meg3
Penk	8.24367e-96	1.42337	0.573	0.557	1.64873e-92	15	Penk
Calm11	4.27122e-84	0.424093	0.982	0.981	8.54244e-81	15	Calm1
Gda1	2.79275e-83	0.679782	0.682	0.65	5.5855e-80	15	Gda
Rasgrp1	5.94589e-76	0.75509	0.574	0.603	1.18918e-72	15	Rasgrp1
Pcp4l11	1.44532e-75	0.62046	0.435	0.44	2.89065e-72	15	Pcp4l1
Ckb3	2.46726e-75	0.539595	0.946	0.926	4.93452e-72	15	Ckb
Slc32a11	1.34159e-74	0.307508	0.492	0.423	2.68318e-71	15	Slc32a1
Ppp1r9a1	5.70735e-71	0.554774	0.744	0.741	1.14147e-67	15	Ppp1r9a
Gpr83	8.2637e-71	0.584484	0.434	0.446	1.65274e-67	15	Gpr83
Tyro3	6.06296e-63	0.375112	0.321	0.369	1.21259e-59	15	Tyro3
Egr1	1.53636e-61	0.452257	0.339	0.384	3.07272e-58	15	Egr1
Auts21	5.52617e-61	0.552298	0.575	0.585	1.10523e-57	15	Auts2
Gpm6b6	1.28543e-59	0.38286	0.651	0.575	2.57085e-56	15	Gpm6b
Ptk2b	1.66948e-56	0.692929	0.482	0.54	3.33897e-53	15	Ptk2b
Nrxn32	1.87842e-56	0.394949	0.783	0.72	3.75684e-53	15	Nrxn3
Dgkb1	3.61284e-53	0.5252	0.572	0.587	7.22569e-50	15	Dgkb
Nrp2	3.62983e-53	0.506092	0.513	0.546	7.25966e-50	15	Nrp2
Actb4	3.38566e-51	0.373578	0.984	0.981	6.77131e-48	15	Actb
Epha4	1.30931e-50	0.343099	0.391	0.433	2.61862e-47	15	Epha4
Hlf1	5.87625e-49	0.345604	0.426	0.462	1.17525e-45	15	Hlf
2900097C17Rik2	6.65668e-49	0.347126	0.928	0.917	1.33134e-45	15	2900097C17Rik
Marcks1	2.88942e-48	0.352225	0.701	0.672	5.77884e-45	15	Marcks
Rbfox11	2.3943e-47	0.467	0.453	0.502	4.78861e-44	15	Rbfox1
Cnksr21	1.06659e-46	0.450059	0.389	0.457	2.13319e-43	15	Cnksr2
Thy12	7.74521e-45	0.263722	0.593	0.549	1.54904e-41	15	Thy1
Zbtb202	5.36369e-43	0.351026	0.893	0.931	1.07274e-39	15	Zbtb20
Chn21	2.45578e-42	0.321805	0.29	0.391	4.91155e-39	15	Chn2
Sorbs22	6.91791e-42	0.462106	0.609	0.665	1.38358e-38	15	Sorbs2
Gria32	3.29307e-41	0.492336	0.612	0.655	6.58615e-38	15	Gria3
Gm45159	1.54106e-38	0.582079	0.523	0.614	3.08213e-35	15	Gm45159
Unc13c1	4.67171e-38	0.394567	0.353	0.445	9.34342e-35	15	Unc13c
Calm21	6.78888e-36	0.271611	0.961	0.966	1.35778e-32	15	Calm2
Trps11	1.75848e-35	0.460705	0.432	0.523	3.51696e-32	15	Trps1
Tac11	6.49518e-34	0.752074	0.594	0.74	1.29904e-30	15	Tac1
Gfra1	1.10016e-33	0.25077	0.258	0.391	2.20033e-30	15	Gfra1
Ogt1	6.02186e-32	0.314663	0.635	0.657	1.20437e-28	15	Ogt
Atp2b41	3.86879e-31	0.471925	0.512	0.599	7.73758e-28	15	Atp2b4
Id4	2.3829e-30	0.353854	0.426	0.515	4.7658e-27	15	Id4
Syn24	7.67407e-29	0.290361	0.69	0.709	1.53481e-25	15	Syn2
Kcna12	8.1651e-29	0.378068	0.348	0.465	1.63302e-25	15	Kcna1
Atp1a12	3.80783e-28	0.38378	0.697	0.775	7.61565e-25	15	Atp1a1
Snca2	4.16362e-27	0.334388	0.466	0.548	8.32724e-24	15	Snca
Foxp2	1.49914e-26	0.842806	0.5	0.659	2.99827e-23	15	Foxp2
Tenm13	2.98984e-25	0.268988	0.52	0.578	5.97969e-22	15	Tenm1
Foxg1	9.27102e-24	0.400925	0.316	0.465	1.8542e-20	15	Foxg1
Rprm	1.90885e-23	0.440984	0.351	0.492	3.8177e-20	15	Rprm
Usp2	6.82721e-23	0.262967	0.249	0.415	1.36544e-19	15	Usp2
Ramp12	1.03931e-22	0.297629	0.361	0.489	2.07861e-19	15	Ramp1
Lmo7	4.88948e-21	0.543889	0.409	0.567	9.77896e-18	15	Lmo7
AC149090.12	3.98872e-19	0.272713	0.795	0.873	7.97744e-16	15	AC149090.1
Bcl11a1	1.11017e-18	0.445394	0.444	0.59	2.22033e-15	15	Bcl11a
Kcnq31	3.94669e-17	0.384697	0.49	0.624	7.89339e-14	15	Kcnq3
Klf91	2.15636e-15	0.372147	0.454	0.607	4.31271e-12	15	Klf9
Pde1a	3.73402e-12	0.276782	0.33	0.511	7.46804e-09	15	Pde1a
Fat3	3.05669e-09	0.315487	0.409	0.593	6.11338e-06	15	Fat3
Col6a1	7.23373e-09	0.675554	0.447	0.669	1.44675e-05	15	Col6a1
Ankrd63	5.63954e-05	0.445289	0.313	0.653	0.112791	15	Ankrd63
Sv2c1	0.000970085	0.337933	0.367	0.603	1	15	Sv2c
Lamp5	0.00149476	0.380092	0.319	0.564	1	15	Lamp5
Otp1	2.10752e-258	0.894547	0.819	0.479	4.21504e-255	16	Otp
Dlk12	1.14658e-230	1.07599	0.931	0.6	2.29316e-227	16	Dlk1
Gnas3	1.26099e-209	0.696587	0.999	0.984	2.52197e-206	16	Gnas
Snhg117	1.90342e-150	0.635389	1	0.994	3.80685e-147	16	Snhg11
Pcdh72	6.21229e-147	0.683762	0.902	0.768	1.24246e-143	16	Pcdh7
Ly6h2	1.92564e-138	0.56806	0.992	0.966	3.85128e-135	16	Ly6h
Pcsk1n1	4.06516e-133	0.546539	1	0.992	8.13032e-130	16	Pcsk1n
Sst1	3.59941e-131	2.55557	0.7	0.549	7.19881e-128	16	Sst
Ecel11	4.50986e-98	0.62279	0.704	0.578	9.01971e-95	16	Ecel1
Resp183	5.65899e-85	0.555911	0.856	0.707	1.1318e-81	16	Resp18
Ptprk	9.78009e-85	0.314751	0.554	0.375	1.95602e-81	16	Ptprk
Slc32a12	3.19781e-80	0.377104	0.67	0.419	6.39562e-77	16	Slc32a1
Hap13	2.86271e-68	0.375869	0.977	0.943	5.72542e-65	16	Hap1
Gpr1012	1.93254e-67	0.532142	0.633	0.504	3.86509e-64	16	Gpr101
Isl12	2.20163e-64	0.44448	0.691	0.61	4.40325e-61	16	Isl1
Pcdh19	9.17116e-63	0.335396	0.665	0.494	1.83423e-59	16	Pcdh19
Dpp101	1.88639e-62	0.343	0.617	0.459	3.77277e-59	16	Dpp10
Nap1l53	2.60975e-60	0.333966	0.993	0.979	5.2195e-57	16	Nap1l5
Col25a11	3.09097e-60	0.39722	0.614	0.459	6.18194e-57	16	Col25a1
Gaa3	4.0894e-58	0.357721	0.959	0.914	8.17879e-55	16	Gaa
Serpini1	7.88791e-58	0.321374	0.62	0.513	1.57758e-54	16	Serpini1
Pgrmc12	1.35898e-56	0.336443	0.96	0.909	2.71796e-53	16	Pgrmc1
Asb41	8.9824e-56	0.384547	0.653	0.597	1.79648e-52	16	Asb4
Rtn13	1.11121e-55	0.32752	0.984	0.975	2.22241e-52	16	Rtn1
Arhgap62	1.96693e-55	0.370276	0.646	0.558	3.93386e-52	16	Arhgap6
Gria33	8.91159e-55	0.437345	0.748	0.652	1.78232e-51	16	Gria3
Atp1b13	1.67088e-50	0.298371	0.993	0.975	3.34175e-47	16	Atp1b1
Atp2b12	5.72787e-49	0.37292	0.817	0.74	1.14557e-45	16	Atp2b1
Six31	5.24794e-48	0.375721	0.614	0.494	1.04959e-44	16	Six3
Nrxn33	1.69006e-47	0.318538	0.877	0.718	3.38012e-44	16	Nrxn3
Ildr2	2.22713e-46	0.274978	0.647	0.539	4.45426e-43	16	Ildr2
Zdbf22	9.79763e-43	0.317964	0.779	0.67	1.95953e-39	16	Zdbf2
Hpcal11	1.30757e-42	0.309968	0.527	0.377	2.61514e-39	16	Hpcal1
Maged12	1.71314e-41	0.268758	0.975	0.948	3.42629e-38	16	Maged1
Gm472833	9.58624e-40	0.325578	0.949	0.946	1.91725e-36	16	Gm47283
Pnoc	8.07368e-39	0.265564	0.436	0.372	1.61474e-35	16	Pnoc
St8sia41	4.75061e-38	0.283268	0.526	0.452	9.50122e-35	16	St8sia4
Rnf1281	7.91215e-38	0.283551	0.595	0.564	1.58243e-34	16	Rnf128
Miat3	8.6507e-37	0.284183	0.731	0.629	1.73014e-33	16	Miat
Ndn3	1.63278e-36	0.383384	0.887	0.876	3.26557e-33	16	Ndn
Ubb2	2.29406e-36	0.272134	0.977	0.959	4.58813e-33	16	Ubb
Scn9a1	2.39011e-34	0.27538	0.649	0.61	4.78021e-31	16	Scn9a
Ncam1	3.63865e-32	0.263028	0.955	0.948	7.2773e-29	16	Ncam1
Gad23	3.46195e-31	0.257211	0.767	0.634	6.9239e-28	16	Gad2
4930447C04Rik1	1.03045e-30	0.289029	0.529	0.483	2.06089e-27	16	4930447C04Rik
Unc5d2	2.69422e-30	0.284994	0.678	0.636	5.38845e-27	16	Unc5d
Parm1	9.40592e-30	0.359861	0.635	0.623	1.88118e-26	16	Parm1
Ppp1r9a2	7.88708e-27	0.265846	0.781	0.74	1.57742e-23	16	Ppp1r9a
Scg22	4.01465e-26	0.295032	0.852	0.814	8.0293e-23	16	Scg2
Ncald2	2.34836e-25	0.253263	0.699	0.62	4.69673e-22	16	Ncald
Agrp	1.70415e-05	0.653127	0.551	0.701	0.034083	16	Agrp
Arhgap36	0.000413707	0.329002	0.471	0.554	0.827414	16	Arhgap36
Npy	0.00723721	0.697805	0.466	0.611	1	16	Npy
Ghrh	1.68002e-244	2.15353	0.797	0.405	3.36004e-241	17	Ghrh
Gal1	1.20305e-230	1.50979	0.759	0.225	2.4061e-227	17	Gal
Asb42	5.77091e-211	1.09333	0.879	0.593	1.15418e-207	17	Asb4
Cartpt1	9.12204e-189	1.70956	0.875	0.562	1.82441e-185	17	Cartpt
Gnas4	2.38258e-124	0.644774	1	0.984	4.76517e-121	17	Gnas
Dlx11	1.53135e-122	0.389598	0.674	0.317	3.0627e-119	17	Dlx1
Cpne7	2.05074e-121	0.546527	0.798	0.481	4.10149e-118	17	Cpne7
Esr1	7.01114e-106	0.296238	0.658	0.418	1.40223e-102	17	Esr1
Snhg118	1.78189e-103	0.597773	1	0.994	3.56378e-100	17	Snhg11
Serpina3n1	4.5813e-100	0.813825	0.711	0.474	9.16259e-97	17	Serpina3n
Dlk13	9.77714e-100	0.640833	0.87	0.603	1.95543e-96	17	Dlk1
Scn9a2	1.123e-97	0.565137	0.809	0.607	2.246e-94	17	Scn9a
Rgs4	3.1694e-96	0.439139	0.788	0.593	6.33881e-93	17	Rgs4
Th	3.52729e-96	0.401985	0.576	0.259	7.05457e-93	17	Th
Trh1	4.94351e-77	0.3644	0.5	0.221	9.88702e-74	17	Trh
Thsd7a	7.55765e-71	0.288096	0.663	0.445	1.51153e-67	17	Thsd7a
Resp184	1.69446e-68	0.544952	0.866	0.707	3.38892e-65	17	Resp18
Slc10a4	1.01743e-66	0.341377	0.622	0.528	2.03485e-63	17	Slc10a4
Ccnd11	2.06136e-65	0.363989	0.553	0.331	4.12272e-62	17	Ccnd1
H2-K11	9.75935e-63	0.308299	0.61	0.419	1.95187e-59	17	H2-K1
Nap1l54	4.79819e-61	0.379652	0.993	0.979	9.59637e-58	17	Nap1l5
Gpr179	9.41838e-58	0.284014	0.614	0.524	1.88368e-54	17	Gpr179
Gaa4	1.01761e-57	0.38701	0.962	0.914	2.03523e-54	17	Gaa
Ecel12	1.54626e-57	0.4963	0.719	0.578	3.09252e-54	17	Ecel1
Pcp42	5.19878e-55	0.4746	0.82	0.627	1.03976e-51	17	Pcp4
Cd631	1.19527e-54	0.255494	0.679	0.451	2.39054e-51	17	Cd63
Ndn4	6.98886e-53	0.572238	0.916	0.876	1.39777e-49	17	Ndn
Mast42	2.1933e-52	0.259107	0.745	0.548	4.38661e-49	17	Mast4
Pam2	2.46812e-52	0.601522	0.824	0.731	4.93625e-49	17	Pam
Rpl82	8.64853e-52	0.372513	0.946	0.91	1.72971e-48	17	Rpl8
Grik11	1.10646e-51	0.279204	0.66	0.477	2.21292e-48	17	Grik1
Ptprn2	4.0319e-51	0.40446	0.91	0.767	8.06379e-48	17	Ptprn
Gpx32	4.32052e-51	0.427823	0.793	0.619	8.64104e-48	17	Gpx3
Eef1a11	2.2972e-48	0.322948	0.997	0.99	4.59439e-45	17	Eef1a1
Peg35	3.52641e-48	0.342133	0.989	0.974	7.05283e-45	17	Peg3
Prune21	9.54515e-48	0.286237	0.702	0.534	1.90903e-44	17	Prune2
Tmem176b	3.92665e-47	0.275837	0.561	0.34	7.85331e-44	17	Tmem176b
Gm472834	7.42425e-47	0.507029	0.98	0.945	1.48485e-43	17	Gm47283
Sorbs23	1.2136e-46	0.31172	0.789	0.661	2.4272e-43	17	Sorbs2
Rpl232	1.72736e-46	0.346266	0.955	0.917	3.45473e-43	17	Rpl23
Rpl101	3.40938e-44	0.386816	0.813	0.635	6.81876e-41	17	Rpl10
Rpl133	1.93453e-43	0.315123	0.981	0.977	3.86906e-40	17	Rpl13
Tmem1301	2.88613e-43	0.357499	0.897	0.785	5.77225e-40	17	Tmem130
Rps27a1	3.83085e-43	0.345012	0.96	0.935	7.6617e-40	17	Rps27a
Scg23	1.10046e-40	0.369728	0.894	0.814	2.20093e-37	17	Scg2
Gabrq1	7.6185e-40	0.275569	0.66	0.521	1.5237e-36	17	Gabrq
Zbtb203	7.73327e-40	0.350214	0.956	0.929	1.54665e-36	17	Zbtb20
Rpl27a2	8.3025e-40	0.321739	0.952	0.892	1.6605e-36	17	Rpl27a
Rpl372	3.33168e-39	0.334773	0.971	0.944	6.66336e-36	17	Rpl37
Atp1a13	9.86927e-39	0.359691	0.886	0.771	1.97385e-35	17	Atp1a1
Gabre1	1.82496e-36	0.322127	0.61	0.532	3.64993e-33	17	Gabre
Maged13	1.14322e-35	0.30574	0.964	0.948	2.28644e-32	17	Maged1
Bex23	2.20903e-34	0.322796	0.976	0.936	4.41806e-31	17	Bex2
Pcdh73	1.55203e-33	0.311938	0.853	0.77	3.10406e-30	17	Pcdh7
Rps102	4.54151e-33	0.312395	0.908	0.835	9.08301e-30	17	Rps10
Rpl92	1.95949e-32	0.294079	0.973	0.952	3.91897e-29	17	Rpl9
Zdbf23	4.85469e-32	0.281127	0.806	0.67	9.70938e-29	17	Zdbf2
Tpt1	6.67389e-32	0.332244	0.829	0.701	1.33478e-28	17	Tpt1
Rps272	3.57091e-30	0.27681	0.911	0.833	7.14182e-27	17	Rps27
Kcnq1ot13	1.30421e-29	0.29026	0.979	0.961	2.60842e-26	17	Kcnq1ot1
Rps81	1.73853e-29	0.26843	0.969	0.949	3.47705e-26	17	Rps8
Kcnk9	3.10102e-29	0.313497	0.589	0.437	6.20204e-26	17	Kcnk9
Rps192	7.98501e-29	0.286618	0.93	0.883	1.597e-25	17	Rps19
Rpl301	8.24442e-29	0.287751	0.928	0.871	1.64888e-25	17	Rpl30
Rpl112	1.91728e-28	0.268438	0.954	0.911	3.83455e-25	17	Rpl11
Parm11	3.42168e-27	0.333834	0.684	0.622	6.84337e-24	17	Parm1
Rpl192	3.99192e-27	0.258427	0.973	0.959	7.98383e-24	17	Rpl19
Tac2	1.92817e-26	0.41981	0.379	0.273	3.85634e-23	17	Tac2
Rpl35a2	5.46024e-26	0.250677	0.966	0.952	1.09205e-22	17	Rpl35a
Vgf3	6.67315e-26	0.485948	0.606	0.477	1.33463e-22	17	Vgf
Rps202	4.41304e-25	0.25815	0.905	0.848	8.82608e-22	17	Rps20
Nrxn34	2.27663e-23	0.272321	0.821	0.719	4.55326e-20	17	Nrxn3
Prox11	2.20577e-20	0.321658	0.523	0.419	4.41154e-17	17	Prox1
H2-D11	9.72956e-14	0.328703	0.484	0.381	1.94591e-10	17	H2-D1
Meg37	7.32908e-174	0.877285	1	0.996	1.46582e-170	18	Meg3
Fezf11	3.61867e-133	0.33627	0.622	0.332	7.23733e-130	18	Fezf1
Cacna2d12	1.16501e-125	0.853389	0.873	0.68	2.33002e-122	18	Cacna2d1
Snhg119	1.95448e-81	0.534665	1	0.994	3.90896e-78	18	Snhg11
Camkv2	5.12003e-78	0.612064	0.81	0.652	1.02401e-74	18	Camkv
Calb12	5.90126e-75	0.554628	0.752	0.491	1.18025e-71	18	Calb1
Nptx11	1.70881e-71	0.254937	0.556	0.323	3.41762e-68	18	Nptx1
Rasgrf22	3.29592e-69	0.594366	0.724	0.504	6.59184e-66	18	Rasgrf2
Gm472835	7.07153e-65	0.628768	0.971	0.945	1.41431e-61	18	Gm47283
Cdh132	3.39654e-56	0.260767	0.667	0.456	6.79308e-53	18	Cdh13
Ar1	7.40373e-55	0.279065	0.667	0.505	1.48075e-51	18	Ar
Ahi12	1.01002e-47	0.363974	0.997	0.986	2.02003e-44	18	Ahi1
Miat4	3.94725e-43	0.368204	0.768	0.629	7.89449e-40	18	Miat
Grm52	2.60326e-42	0.346457	0.752	0.608	5.20651e-39	18	Grm5
Car101	4.06646e-41	0.299708	0.643	0.512	8.13291e-38	18	Car10
Gria25	1.54283e-36	0.353483	0.979	0.971	3.08566e-33	18	Gria2
Sorbs24	6.56791e-36	0.38575	0.723	0.662	1.31358e-32	18	Sorbs2
Rreb11	7.0757e-33	0.297589	0.655	0.648	1.41514e-29	18	Rreb1
Slc17a62	7.96225e-32	0.326827	0.684	0.576	1.59245e-28	18	Slc17a6
6330403K07Rik2	5.01476e-30	0.278761	0.971	0.94	1.00295e-26	18	6330403K07Rik
Gda2	1.56556e-28	0.351619	0.735	0.649	3.13112e-25	18	Gda
Ppp3ca2	6.93208e-20	0.259194	0.878	0.882	1.38642e-16	18	Ppp3ca
Kcnq1ot14	3.0762e-19	0.283148	0.968	0.961	6.15239e-16	18	Kcnq1ot1
Nrgn1	1.45908e-16	0.400525	0.614	0.547	2.91816e-13	18	Nrgn
Ncdn3	2.88218e-15	0.25332	0.685	0.634	5.76437e-12	18	Ncdn
Gria34	2.26171e-14	0.284811	0.684	0.654	4.52342e-11	18	Gria3
C230004F18Rik2	4.10849e-12	0.323103	0.734	0.733	8.21699e-09	18	C230004F18Rik
Lbhd21	1.04225e-10	0.264661	0.404	0.339	2.08449e-07	18	Lbhd2
Npy1	0	2.99331	0.963	0.602	0	19	Npy
Agrp1	0	2.83134	0.974	0.692	0	19	Agrp
Pcsk1n2	2.53733e-212	0.925551	1	0.992	5.07466e-209	19	Pcsk1n
Otp2	1.86329e-163	0.905429	0.746	0.482	3.72659e-160	19	Otp
Serpina3n2	4.45282e-154	0.947607	0.732	0.474	8.90564e-151	19	Serpina3n
Prune22	9.24193e-135	0.89695	0.764	0.534	1.84839e-131	19	Prune2
Acvr1c2	4.79691e-113	0.926325	0.699	0.575	9.59381e-110	19	Acvr1c
Irs42	8.78477e-111	0.837083	0.759	0.619	1.75695e-107	19	Irs4
Kcnk91	5.28508e-105	0.733745	0.654	0.436	1.05702e-101	19	Kcnk9
Dlk14	1.7191e-98	0.739409	0.812	0.604	3.4382e-95	19	Dlk1
Cited11	2.63872e-97	0.725903	0.675	0.521	5.27745e-94	19	Cited1
Plagl11	1.66425e-91	0.764733	0.684	0.547	3.32851e-88	19	Plagl1
Resp185	3.47066e-71	0.589611	0.816	0.709	6.94131e-68	19	Resp18
Gnas5	2.12463e-64	0.390615	0.997	0.984	4.24926e-61	19	Gnas
Kcnk21	9.19649e-58	0.505736	0.566	0.42	1.8393e-54	19	Kcnk2
Zfhx3	1.42556e-52	0.453855	0.654	0.504	2.85112e-49	19	Zfhx3
Ptprk1	4.27735e-51	0.399406	0.483	0.377	8.5547e-48	19	Ptprk
Rpl93	6.34559e-50	0.410707	0.966	0.952	1.26912e-46	19	Rpl9
Gm472836	6.97103e-50	0.604543	0.962	0.945	1.39421e-46	19	Gm47283
Unc5d3	1.98568e-49	0.564477	0.672	0.636	3.97135e-46	19	Unc5d
Snhg1110	6.94995e-48	0.434188	1	0.994	1.38999e-44	19	Snhg11
Eef1a12	7.38599e-45	0.326266	0.996	0.99	1.4772e-41	19	Eef1a1
Gpx33	4.13454e-42	0.454285	0.695	0.621	8.26907e-39	19	Gpx3
Ly6h3	1.52036e-37	0.325078	0.98	0.967	3.04072e-34	19	Ly6h
Arhgap63	7.9866e-37	0.519032	0.588	0.559	1.59732e-33	19	Arhgap6
Rpl83	8.72159e-36	0.337483	0.93	0.91	1.74432e-32	19	Rpl8
Pgr15l	8.80486e-36	0.30378	0.393	0.365	1.76097e-32	19	Pgr15l
Rpl193	1.26891e-34	0.336316	0.964	0.959	2.53783e-31	19	Rpl19
Ndn5	6.0707e-33	0.356646	0.903	0.876	1.21414e-29	19	Ndn
Csgalnact1	8.0884e-30	0.307598	0.415	0.431	1.61768e-26	19	Csgalnact1
Dmd	2.114e-29	0.423713	0.625	0.603	4.228e-26	19	Dmd
Rps27a2	1.4351e-28	0.314987	0.944	0.936	2.87019e-25	19	Rps27a
Rps273	2.3856e-28	0.297644	0.877	0.833	4.77121e-25	19	Rps27
Rps82	2.27849e-27	0.272776	0.947	0.949	4.55697e-24	19	Rps8
Rpl35a3	9.54668e-27	0.286018	0.959	0.952	1.90934e-23	19	Rpl35a
Pcdh92	3.86714e-26	0.396435	0.648	0.635	7.73428e-23	19	Pcdh9
Rpl37a2	5.11811e-26	0.286034	0.92	0.909	1.02362e-22	19	Rpl37a
Rpl134	5.45994e-26	0.270602	0.976	0.977	1.09199e-22	19	Rpl13
Atp1a14	6.20453e-26	0.380242	0.772	0.773	1.24091e-22	19	Atp1a1
Rpl142	2.22026e-24	0.275569	0.865	0.838	4.44051e-21	19	Rpl14
Kcnq1ot15	1.23081e-22	0.329565	0.95	0.961	2.46161e-19	19	Kcnq1ot1
Srrm21	3.46942e-22	0.304623	0.936	0.952	6.93885e-19	19	Srrm2
Fau1	4.58103e-20	0.254091	0.947	0.953	9.16206e-17	19	Fau
Rgs2	1.05178e-18	0.432442	0.561	0.61	2.10356e-15	19	Rgs2
Auts22	1.22465e-15	0.340882	0.554	0.586	2.4493e-12	19	Auts2
St8sia42	1.14378e-14	0.320743	0.442	0.454	2.28756e-11	19	St8sia4
Scn9a3	1.38014e-14	0.408251	0.547	0.612	2.76028e-11	19	Scn9a
Npy2r	9.27341e-14	0.460089	0.422	0.489	1.85468e-10	19	Npy2r
Pitpnc12	1.03518e-13	0.308071	0.513	0.551	2.07036e-10	19	Pitpnc1
Ppp1r9a3	1.41067e-11	0.25519	0.677	0.742	2.82135e-08	19	Ppp1r9a
Arhgap361	7.0787e-11	0.323997	0.487	0.553	1.41574e-07	19	Arhgap36
Asb43	1.4673e-07	0.328152	0.503	0.6	0.000293461	19	Asb4
Corin	9.95927e-07	0.298482	0.432	0.606	0.00199185	19	Corin
Isl13	3.18983e-06	0.270701	0.509	0.614	0.00637967	19	Isl1
Rasgrp11	4.71369e-06	0.385276	0.484	0.604	0.00942737	19	Rasgrp1
Calcr	6.39587e-06	0.261471	0.332	0.424	0.0127917	19	Calcr
Sst2	0.00562656	0.451199	0.425	0.555	1	19	Sst
Tac12	6.47066e-235	2.38498	0.925	0.734	1.29413e-231	20	Tac1
Calb21	2.49325e-190	1.18859	0.893	0.42	4.98651e-187	20	Calb2
Vsnl12	3.7464e-177	1.10978	0.921	0.543	7.4928e-174	20	Vsnl1
Cpne71	5.27267e-175	1.39432	0.828	0.483	1.05453e-171	20	Cpne7
Scg24	1.02489e-160	0.994204	0.981	0.813	2.04978e-157	20	Scg2
Cacna2d13	3.15515e-159	1.08792	0.944	0.68	6.31029e-156	20	Cacna2d1
Rab3c3	2.79282e-155	0.970933	0.973	0.837	5.58565e-152	20	Rab3c
Ar2	2.67214e-140	1.04043	0.785	0.504	5.34428e-137	20	Ar
App3	5.01108e-140	0.775539	0.994	0.96	1.00222e-136	20	App
Irs43	2.96299e-131	1.04058	0.81	0.619	5.92599e-128	20	Irs4
Ntng12	6.70729e-130	0.95764	0.789	0.532	1.34146e-126	20	Ntng1
Nxph11	2.38237e-128	0.899625	0.753	0.518	4.76474e-125	20	Nxph1
Camk2d1	3.88028e-121	0.933154	0.868	0.629	7.76057e-118	20	Camk2d
Ly6h4	2.47086e-117	0.704982	0.992	0.967	4.94173e-114	20	Ly6h
Atp1b14	7.0591e-116	0.668119	0.996	0.976	1.41182e-112	20	Atp1b1
Pcdh171	1.01292e-112	0.830184	0.897	0.683	2.02584e-109	20	Pcdh17
Slc17a63	2.56956e-112	0.803871	0.833	0.574	5.13913e-109	20	Slc17a6
Basp12	3.99061e-109	0.726594	0.95	0.834	7.98122e-106	20	Basp1
Foxp21	6.04305e-100	0.992412	0.738	0.654	1.20861e-96	20	Foxp2
Pcdh74	3.48334e-93	0.698258	0.879	0.77	6.96667e-90	20	Pcdh7
Ddc	1.49386e-92	0.671095	0.579	0.382	2.98772e-89	20	Ddc
Nap1l55	1.90406e-87	0.571062	0.998	0.979	3.80812e-84	20	Nap1l5
C1ql31	2.94629e-87	0.542573	0.502	0.31	5.89257e-84	20	C1ql3
Resp186	8.02671e-87	0.746366	0.854	0.709	1.60534e-83	20	Resp18
Tubb32	2.58249e-85	0.676406	0.852	0.625	5.16498e-82	20	Tubb3
Tubb2a2	1.02957e-82	0.63734	0.921	0.821	2.05915e-79	20	Tubb2a
Htr2c2	2.92681e-79	0.614549	0.623	0.444	5.85362e-76	20	Htr2c
Gap433	2.11522e-76	0.584593	0.914	0.757	4.23043e-73	20	Gap43
Pcsk1n3	5.21637e-76	0.542119	0.998	0.992	1.04327e-72	20	Pcsk1n
Map1b1	1.5246e-75	0.517133	0.983	0.969	3.0492e-72	20	Map1b
Syt41	1.38512e-74	0.608426	0.918	0.783	2.77024e-71	20	Syt4
Gnas6	5.74614e-74	0.475907	0.996	0.984	1.14923e-70	20	Gnas
Gabrg11	5.92429e-71	0.607446	0.674	0.506	1.18486e-67	20	Gabrg1
Nnat2	2.68281e-70	0.662597	0.898	0.802	5.36563e-67	20	Nnat
Rtn14	7.80012e-70	0.477555	0.996	0.975	1.56002e-66	20	Rtn1
Ywhag1	1.18856e-67	0.527891	0.939	0.865	2.37712e-64	20	Ywhag
Elavl22	3.60776e-67	0.497657	0.741	0.499	7.21552e-64	20	Elavl2
Lrp1b1	3.2813e-66	0.661136	0.751	0.609	6.56259e-63	20	Lrp1b
Hpcal12	7.0125e-66	0.518306	0.552	0.378	1.4025e-62	20	Hpcal1
Stmn11	6.05438e-61	0.524265	0.91	0.818	1.21088e-57	20	Stmn1
6330403K07Rik3	9.40326e-59	0.454419	0.977	0.94	1.88065e-55	20	6330403K07Rik
Meg38	1.27072e-58	0.572409	0.992	0.996	2.54144e-55	20	Meg3
Gabrb11	3.12535e-58	0.497263	0.902	0.754	6.25071e-55	20	Gabrb1
Satb1	8.0179e-54	0.715113	0.557	0.503	1.60358e-50	20	Satb1
Prkacb1	3.09165e-53	0.470362	0.944	0.901	6.18331e-50	20	Prkacb
Plxdc2	1.66038e-52	0.544323	0.538	0.456	3.32076e-49	20	Plxdc2
Ttc34	4.00875e-52	0.350595	0.998	0.996	8.0175e-49	20	Ttc3
Rnf1282	1.78286e-51	0.643768	0.603	0.565	3.56572e-48	20	Rnf128
Celf42	4.03431e-51	0.418022	0.971	0.938	8.06862e-48	20	Celf4
Nos1	6.00656e-51	0.530289	0.506	0.445	1.20131e-47	20	Nos1
Celf21	6.9061e-51	0.471085	0.86	0.793	1.38122e-47	20	Celf2
Uchl14	1.15708e-50	0.454108	0.958	0.93	2.31416e-47	20	Uchl1
Bex24	3.35503e-49	0.449259	0.962	0.936	6.71007e-46	20	Bex2
Zwint2	4.08711e-49	0.420941	0.967	0.942	8.17421e-46	20	Zwint
Pam3	1.64434e-46	0.57685	0.778	0.733	3.28868e-43	20	Pam
Ahi13	6.26951e-46	0.355976	0.994	0.986	1.2539e-42	20	Ahi1
Peg36	1.46361e-44	0.380422	0.989	0.974	2.92722e-41	20	Peg3
Impact3	6.27351e-42	0.397885	0.937	0.881	1.2547e-38	20	Impact
Camk2n11	2.13391e-41	0.377231	0.766	0.603	4.26781e-38	20	Camk2n1
Auts23	2.24756e-40	0.476584	0.623	0.585	4.49512e-37	20	Auts2
Ubb3	5.08238e-40	0.422583	0.952	0.959	1.01648e-36	20	Ubb
Rmst2	1.47479e-39	0.409025	0.51	0.448	2.94958e-36	20	Rmst
Gaa5	3.42307e-39	0.382246	0.944	0.915	6.84614e-36	20	Gaa
Calm22	1.53725e-38	0.362453	0.966	0.966	3.07451e-35	20	Calm2
Chgb1	5.72524e-38	0.437855	0.709	0.605	1.14505e-34	20	Chgb
Tuba1a	8.22376e-38	0.389467	0.898	0.842	1.64475e-34	20	Tuba1a
Hsp90aa12	1.68882e-37	0.326015	0.989	0.98	3.37765e-34	20	Hsp90aa1
Ncald3	4.52346e-37	0.374122	0.734	0.62	9.04692e-34	20	Ncald
Calb13	5.41027e-36	0.346521	0.617	0.495	1.08205e-32	20	Calb1
Dgkk1	5.67522e-36	0.344867	0.408	0.397	1.13504e-32	20	Dgkk
Marcks2	1.68343e-35	0.364173	0.793	0.671	3.36686e-32	20	Marcks
Pgrmc13	2.025e-35	0.342087	0.935	0.91	4.05e-32	20	Pgrmc1
Nrn11	3.7233e-34	0.282634	0.289	0.313	7.4466e-31	20	Nrn1
Dner1	6.13543e-34	0.328641	0.749	0.606	1.22709e-30	20	Dner
Grin3a	2.83386e-33	0.412657	0.494	0.467	5.66772e-30	20	Grin3a
Nr4a2	3.67577e-33	0.68504	0.552	0.624	7.35154e-30	20	Nr4a2
Psap1	5.32431e-32	0.298334	0.994	0.975	1.06486e-28	20	Psap
Snap254	5.79679e-32	0.301652	0.948	0.92	1.15936e-28	20	Snap25
Ncdn4	8.81843e-31	0.334177	0.747	0.633	1.76369e-27	20	Ncdn
Pcsk22	3.28609e-30	0.252893	0.55	0.477	6.57218e-27	20	Pcsk2
Cadm1	3.11714e-29	0.310915	0.845	0.748	6.23428e-26	20	Cadm1
Ppia1	7.55767e-29	0.342978	0.964	0.962	1.51153e-25	20	Ppia
Snhg1111	9.20707e-29	0.37584	0.994	0.994	1.84141e-25	20	Snhg11
Kcnk92	7.12667e-27	0.308877	0.437	0.44	1.42533e-23	20	Kcnk9
Nts1	1.37288e-26	0.438121	0.268	0.321	2.74575e-23	20	Nts
Adgrl21	1.86258e-26	0.548201	0.569	0.617	3.72517e-23	20	Adgrl2
Cnr11	1.0494e-24	0.254762	0.446	0.441	2.0988e-21	20	Cnr1
Adcyap11	2.01498e-24	0.437851	0.4	0.443	4.02996e-21	20	Adcyap1
Hap14	6.06156e-23	0.267868	0.958	0.943	1.21231e-19	20	Hap1
Pcdh191	6.63982e-23	0.306792	0.508	0.498	1.32796e-19	20	Pcdh19
Lsamp2	2.42147e-22	0.320514	0.824	0.797	4.84293e-19	20	Lsamp
Aplp12	2.5215e-22	0.263297	0.837	0.793	5.043e-19	20	Aplp1
Ppp3ca3	3.42102e-20	0.253123	0.897	0.882	6.84203e-17	20	Ppp3ca
Edil32	4.85854e-20	0.276904	0.529	0.522	9.71707e-17	20	Edil3
Gapdh1	4.1602e-19	0.273669	0.948	0.957	8.32039e-16	20	Gapdh
Ret	4.76544e-19	0.375653	0.316	0.409	9.53089e-16	20	Ret
Oprk1	6.36075e-19	0.259011	0.339	0.418	1.27215e-15	20	Oprk1
Fstl52	6.78621e-19	0.325081	0.414	0.454	1.35724e-15	20	Fstl5
Tmsb4x2	3.33193e-18	0.250827	0.946	0.95	6.66386e-15	20	Tmsb4x
Pcdh11x	4.6668e-18	0.32199	0.387	0.448	9.33361e-15	20	Pcdh11x
Brinp33	1.75813e-17	0.329421	0.431	0.476	3.51626e-14	20	Brinp3
Necab1	3.62333e-17	0.42752	0.425	0.515	7.24667e-14	20	Necab1
Crhbp	7.04044e-17	0.388529	0.211	0.329	1.40809e-13	20	Crhbp
Bdnf1	2.0512e-16	0.358699	0.32	0.411	4.10239e-13	20	Bdnf
C230004F18Rik3	8.45566e-16	0.263609	0.734	0.733	1.69113e-12	20	C230004F18Rik
Slc18a2	1.63924e-15	0.525168	0.456	0.561	3.27849e-12	20	Slc18a2
Cnksr22	6.57971e-15	0.29177	0.364	0.456	1.31594e-11	20	Cnksr2
Slc6a3	1.83513e-14	0.346947	0.291	0.417	3.67025e-11	20	Slc6a3
Tmeff22	2.57652e-13	0.301921	0.412	0.505	5.15304e-10	20	Tmeff2
Arpp212	1.76145e-12	0.367158	0.575	0.705	3.52289e-09	20	Arpp21
Atp2b42	5.37367e-12	0.277742	0.523	0.598	1.07473e-08	20	Atp2b4
Atp1a15	6.71635e-12	0.259972	0.72	0.774	1.34327e-08	20	Atp1a1
Wnt7b1	7.62969e-12	0.348677	0.328	0.451	1.52594e-08	20	Wnt7b
Pbx3	7.7051e-11	0.423242	0.404	0.539	1.54102e-07	20	Pbx3
Ap1s2	3.02357e-10	0.345135	0.452	0.549	6.04714e-07	20	Ap1s2
Rbms31	2.81431e-08	0.375188	0.498	0.652	5.62862e-05	20	Rbms3
Penk1	3.60516e-05	0.495266	0.398	0.559	0.0721033	20	Penk
Irx5	0.000162789	0.344968	0.31	0.501	0.325577	20	Irx5
Rprm1	0.0061645	0.304118	0.291	0.492	1	20	Rprm
Nnat3	6.98199e-290	2.59029	0.998	0.801	1.3964e-286	21	Nnat
Apoe4	9.09662e-212	1.74104	1	0.81	1.81932e-208	21	Apoe
Cst34	5.81141e-198	1.60623	0.996	0.932	1.16228e-194	21	Cst3
Col23a1	8.24232e-194	1.75084	0.865	0.601	1.64846e-190	21	Col23a1
Prdx61	8.11969e-177	1.59161	0.882	0.535	1.62394e-173	21	Prdx6
Ntrk22	3.50785e-175	1.52453	0.98	0.854	7.0157e-172	21	Ntrk2
Zbtb204	9.07457e-146	1.05792	0.996	0.929	1.81491e-142	21	Zbtb20
6330403K07Rik4	2.7049e-132	1.26224	0.992	0.94	5.4098e-129	21	6330403K07Rik
Gpr50	1.40564e-120	0.988636	0.755	0.548	2.81128e-117	21	Gpr50
Ccdc114	2.97401e-105	0.742693	0.647	0.398	5.94803e-102	21	Ccdc114
Slit21	4.07355e-95	0.985621	0.733	0.45	8.1471e-92	21	Slit2
Ptn4	2.1551e-93	1.11123	0.802	0.492	4.31021e-90	21	Ptn
Nfib2	1.06586e-92	0.938523	0.739	0.488	2.13171e-89	21	Nfib
Col5a2	9.25708e-91	0.467124	0.573	0.348	1.85142e-87	21	Col5a2
S100a6	3.03109e-86	0.959691	0.678	0.505	6.06219e-83	21	S100a6
Rax	2.44138e-81	0.647203	0.637	0.473	4.88275e-78	21	Rax
Slc7a112	1.75384e-80	0.555886	0.622	0.405	3.50768e-77	21	Slc7a11
Ildr21	4.64432e-77	0.823903	0.735	0.539	9.28863e-74	21	Ildr2
Cd93	3.68461e-76	0.507309	0.565	0.304	7.36922e-73	21	Cd9
Slc1a33	1.03363e-75	0.888808	0.753	0.489	2.06725e-72	21	Slc1a3
Lrriq1	4.43228e-74	0.685857	0.641	0.511	8.86456e-71	21	Lrriq1
Ttyh12	2.63339e-73	0.747412	0.802	0.578	5.26677e-70	21	Ttyh1
Rmst3	3.70791e-73	0.833808	0.694	0.446	7.41581e-70	21	Rmst
Vcan1	1.79752e-70	0.78871	0.665	0.526	3.59504e-67	21	Vcan
Srebf11	4.29215e-66	0.540583	0.665	0.479	8.5843e-63	21	Srebf1
Cdc14a1	1.01022e-63	0.550138	0.62	0.46	2.02044e-60	21	Cdc14a
Utrn1	1.06606e-62	0.366526	0.612	0.404	2.13211e-59	21	Utrn
Itgb5	4.7511e-62	0.295847	0.586	0.435	9.5022e-59	21	Itgb5
Sox91	3.50078e-61	0.710125	0.602	0.419	7.00157e-58	21	Sox9
Malat17	4.82483e-61	0.552717	1	1	9.64966e-58	21	Malat1
Ephb1	4.96383e-61	0.339095	0.61	0.425	9.92767e-58	21	Ephb1
Hepacam3	1.20958e-60	0.531733	0.62	0.36	2.41915e-57	21	Hepacam
Slc39a121	2.84675e-60	0.250682	0.545	0.368	5.6935e-57	21	Slc39a12
Scn7a	3.86949e-59	0.493302	0.494	0.326	7.73897e-56	21	Scn7a
Slc16a2	2.95994e-58	0.800807	0.641	0.51	5.91987e-55	21	Slc16a2
Tcf43	5.31132e-57	0.740967	0.784	0.673	1.06226e-53	21	Tcf4
Msi23	4.68356e-56	0.745735	0.792	0.666	9.36712e-53	21	Msi2
Atp1a24	2.63248e-55	0.619746	0.829	0.684	5.26496e-52	21	Atp1a2
Ddo	2.01019e-53	0.43281	0.559	0.396	4.02038e-50	21	Ddo
Thrsp	1.35511e-52	0.519282	0.559	0.402	2.71022e-49	21	Thrsp
Antxr1	1.93993e-52	0.413331	0.506	0.331	3.87986e-49	21	Antxr1
Gstm12	3.64474e-51	0.509927	0.624	0.395	7.28949e-48	21	Gstm1
Notch11	1.58257e-50	0.400074	0.582	0.479	3.16513e-47	21	Notch1
Bcan3	4.61881e-50	0.476286	0.714	0.483	9.23761e-47	21	Bcan
Mt14	9.14508e-49	0.623604	0.763	0.57	1.82902e-45	21	Mt1
Pitpnc13	1.88171e-48	0.592365	0.69	0.548	3.76343e-45	21	Pitpnc1
Mlc12	5.32139e-48	0.683356	0.565	0.352	1.06428e-44	21	Mlc1
Son4	1.0348e-47	0.574332	0.922	0.887	2.06959e-44	21	Son
Nfix3	5.38074e-47	0.55939	0.645	0.48	1.07615e-43	21	Nfix
mt-Co16	5.96974e-47	0.38073	1	1	1.19395e-43	21	mt-Co1
Tmem47	6.30129e-47	0.652492	0.655	0.505	1.26026e-43	21	Tmem47
Tiparp	1.23964e-46	0.503516	0.645	0.547	2.47928e-43	21	Tiparp
Pbxip12	3.5454e-46	0.598463	0.627	0.488	7.0908e-43	21	Pbxip1
Prex22	9.33199e-46	0.294672	0.578	0.44	1.8664e-42	21	Prex2
Crym1	1.71175e-44	0.55792	0.665	0.713	3.42349e-41	21	Crym
Soat1	6.80518e-44	0.334421	0.565	0.45	1.36104e-40	21	Soat1
Ogt2	5.72559e-43	0.559327	0.806	0.655	1.14512e-39	21	Ogt
Spef2	2.2771e-42	0.674032	0.494	0.297	4.5542e-39	21	Spef2
Gpm6b7	2.28689e-42	0.554701	0.741	0.574	4.57377e-39	21	Gpm6b
Cpe4	9.82978e-42	0.482128	0.965	0.895	1.96596e-38	21	Cpe
Fzd5	1.49758e-41	0.511669	0.608	0.531	2.99517e-38	21	Fzd5
Slc1a23	5.24519e-41	0.576233	0.927	0.82	1.04904e-37	21	Slc1a2
Dbi4	2.3095e-40	0.585665	0.641	0.454	4.619e-37	21	Dbi
Ccnd2	2.32624e-40	0.362965	0.551	0.418	4.65249e-37	21	Ccnd2
Sorbs25	1.02383e-39	0.634958	0.735	0.662	2.04765e-36	21	Sorbs2
Arap22	1.95237e-39	0.472646	0.618	0.518	3.90475e-36	21	Arap2
Sfxn51	1.20113e-38	0.385649	0.563	0.399	2.40225e-35	21	Sfxn5
Nkx2-4	7.69542e-38	0.333075	0.606	0.562	1.53908e-34	21	Nkx2-4
Epb41l2	7.47998e-37	0.341402	0.569	0.457	1.496e-33	21	Epb41l2
Cfap100	1.69698e-36	0.3531	0.459	0.344	3.39395e-33	21	Cfap100
Dnah6	1.8504e-36	0.349154	0.504	0.482	3.7008e-33	21	Dnah6
Cd632	5.97639e-36	0.400274	0.62	0.453	1.19528e-32	21	Cd63
Sox21	5.84319e-35	0.284075	0.576	0.42	1.16864e-31	21	Sox2
Tcf7l2	1.00195e-34	0.490362	0.569	0.47	2.00391e-31	21	Tcf7l2
Vim1	1.72859e-34	0.642051	0.575	0.553	3.45718e-31	21	Vim
Hes1	1.9879e-34	0.264949	0.529	0.437	3.9758e-31	21	Hes1
Gja12	5.89021e-34	0.510021	0.545	0.403	1.17804e-30	21	Gja1
Kctd14	1.97202e-33	0.320647	0.525	0.498	3.94404e-30	21	Kctd14
Lamb21	4.80445e-33	0.344834	0.5	0.424	9.6089e-30	21	Lamb2
Bcl21	7.60392e-32	0.515754	0.553	0.468	1.52078e-28	21	Bcl2
Sdc42	7.13961e-31	0.270714	0.475	0.349	1.42792e-27	21	Sdc4
Nkain42	9.3087e-31	0.280087	0.484	0.354	1.86174e-27	21	Nkain4
Id41	1.1939e-30	0.66861	0.596	0.511	2.38779e-27	21	Id4
Rarres2	2.36715e-30	0.316288	0.41	0.3	4.7343e-27	21	Rarres2
Timp34	2.50624e-29	0.393105	0.604	0.471	5.01248e-26	21	Timp3
Mdk	1.13771e-28	0.26088	0.443	0.312	2.27543e-25	21	Mdk
Smo	7.87989e-28	0.255952	0.394	0.286	1.57598e-24	21	Smo
Spon11	2.36414e-27	0.374484	0.543	0.433	4.72828e-24	21	Spon1
Metrn	7.82021e-27	0.476949	0.484	0.339	1.56404e-23	21	Metrn
Scd24	1.08083e-26	0.282959	0.927	0.844	2.16166e-23	21	Scd2
Itm2c3	1.69252e-26	0.360253	0.984	0.938	3.38505e-23	21	Itm2c
Mt33	1.03315e-25	0.382203	0.865	0.805	2.0663e-22	21	Mt3
Lrrc23	1.19993e-25	0.403136	0.457	0.395	2.39986e-22	21	Lrrc23
Pltp1	4.21854e-25	0.442649	0.404	0.31	8.43708e-22	21	Pltp
Deptor1	5.68837e-25	0.260817	0.52	0.45	1.13767e-21	21	Deptor
Pnisr1	6.22934e-25	0.416796	0.869	0.871	1.24587e-21	21	Pnisr
Mt23	2.20206e-24	0.405409	0.557	0.424	4.40412e-21	21	Mt2
Aldoc3	5.89275e-24	0.446507	0.718	0.651	1.17855e-20	21	Aldoc
Slc27a11	1.28945e-23	0.282846	0.484	0.389	2.5789e-20	21	Slc27a1
Map21	2.47177e-21	0.299366	0.971	0.948	4.94354e-18	21	Map2
Zfp36l12	1.20585e-20	0.386346	0.425	0.331	2.4117e-17	21	Zfp36l1
Nfia5	2.56756e-20	0.375795	0.504	0.399	5.13512e-17	21	Nfia
Col25a12	4.92807e-20	0.485278	0.557	0.461	9.85614e-17	21	Col25a1
Hist1h2bc	4.2165e-19	0.264389	0.371	0.317	8.43299e-16	21	Hist1h2bc
Dnah12	2.84465e-18	0.491982	0.449	0.467	5.6893e-15	21	Dnah12
mt-Nd54	2.9005e-18	0.276304	0.965	0.922	5.801e-15	21	mt-Nd5
Sft2d2	5.62519e-18	0.295344	0.496	0.496	1.12504e-14	21	Sft2d2
Chpt12	1.34915e-17	0.310372	0.549	0.49	2.6983e-14	21	Chpt1
Tead1	8.41107e-17	0.2672	0.512	0.458	1.68221e-13	21	Tead1
Igfbp51	2.18667e-16	0.298025	0.398	0.324	4.37334e-13	21	Igfbp5
Aebp1	3.91167e-16	0.274888	0.349	0.328	7.82334e-13	21	Aebp1
Dst1	1.37075e-15	0.270416	0.91	0.911	2.7415e-12	21	Dst
Cfap44	3.34788e-15	0.485713	0.498	0.494	6.69575e-12	21	Cfap44
Ccdc180	4.68545e-15	0.268396	0.414	0.407	9.37089e-12	21	Ccdc180
Neat13	6.40566e-15	0.28086	0.506	0.45	1.28113e-11	21	Neat1
Fxyd1	7.23017e-14	0.266542	0.343	0.275	1.44603e-10	21	Fxyd1
S100a11	7.33081e-14	0.258247	0.361	0.273	1.46616e-10	21	S100a1
Plpp32	4.62653e-13	0.33287	0.58	0.551	9.25306e-10	21	Plpp3
Ahnak1	8.66046e-12	0.352873	0.465	0.497	1.73209e-08	21	Ahnak
Cfap65	2.44188e-11	0.448947	0.42	0.49	4.88376e-08	21	Cfap65
Frzb	2.93058e-11	0.330793	0.386	0.371	5.86117e-08	21	Frzb
Catip	5.28e-11	0.395518	0.424	0.426	1.056e-07	21	Catip
Gm424182	6.15178e-11	0.375173	1	0.999	1.23036e-07	21	Gm42418
Ifi27	3.86295e-08	0.321912	0.476	0.501	7.72589e-05	21	Ifi27
Dnah11	5.04462e-08	0.434999	0.425	0.471	0.000100892	21	Dnah11
H2-K12	1.22211e-07	0.251131	0.41	0.422	0.000244422	21	H2-K1
Ttll31	0.00119649	0.313349	0.451	0.515	1	21	Ttll3
Six32	0.00598911	0.263087	0.441	0.497	1	21	Six3
Cfap43	0.00919808	0.517567	0.408	0.496	1	21	Cfap43
Tac21	1.41526e-223	2.2663	0.87	0.269	2.83052e-220	22	Tac2
Prlr1	2.33468e-151	1.28951	0.861	0.577	4.66936e-148	22	Prlr
Snhg1112	7.64369e-141	0.91567	1	0.994	1.52874e-137	22	Snhg11
Pgrmc14	2.39085e-115	0.892973	0.969	0.91	4.78171e-112	22	Pgrmc1
Tacr3	1.41583e-102	0.524856	0.541	0.293	2.83165e-99	22	Tacr3
Kcnk22	3.61798e-91	0.796848	0.702	0.419	7.23597e-88	22	Kcnk2
Gm472837	1.64013e-71	0.773768	0.976	0.945	3.28025e-68	22	Gm47283
Pcdh11x1	7.75488e-67	0.724529	0.66	0.445	1.55098e-63	22	Pcdh11x
Scg25	2.77446e-66	0.647167	0.927	0.814	5.54892e-63	22	Scg2
Pdyn	1.32481e-63	0.7596	0.638	0.49	2.64962e-60	22	Pdyn
Pcdh192	4.12649e-60	0.627171	0.702	0.496	8.25298e-57	22	Pcdh19
Rgs21	9.95533e-57	0.763973	0.715	0.608	1.99107e-53	22	Rgs2
Rbms32	1.50293e-49	0.677382	0.695	0.65	3.00585e-46	22	Rbms3
Nell1	1.51705e-47	0.31179	0.506	0.368	3.03409e-44	22	Nell1
Calb14	1.52618e-47	0.514552	0.711	0.494	3.05237e-44	22	Calb1
Esr11	1.8395e-46	0.611651	0.534	0.422	3.679e-43	22	Esr1
Oprk11	1.67777e-45	0.376325	0.521	0.415	3.35554e-42	22	Oprk1
C230004F18Rik4	1.79196e-44	0.673251	0.85	0.731	3.58393e-41	22	C230004F18Rik
Hcn11	1.71904e-39	0.317519	0.528	0.406	3.43808e-36	22	Hcn1
Zfhx31	3.79179e-39	0.480289	0.634	0.505	7.58357e-36	22	Zfhx3
4933406B17Rik	4.53939e-39	0.595011	0.532	0.486	9.07877e-36	22	4933406B17Rik
C1ql21	2.51278e-38	0.273239	0.435	0.385	5.02556e-35	22	C1ql2
Vgll31	4.44533e-36	0.699213	0.563	0.532	8.89066e-33	22	Vgll3
Tmem35a2	2.09872e-35	0.608198	0.64	0.579	4.19744e-32	22	Tmem35a
Eef1a13	1.12047e-33	0.358449	0.998	0.99	2.24095e-30	22	Eef1a1
Unc5d4	5.55326e-33	0.462379	0.698	0.636	1.11065e-29	22	Unc5d
Kcnq1ot16	1.77029e-32	0.405905	0.954	0.961	3.54059e-29	22	Kcnq1ot1
Igf1r1	3.42235e-32	0.300287	0.525	0.446	6.84471e-29	22	Igf1r
Sphkap1	2.5175e-31	0.518955	0.558	0.493	5.035e-28	22	Sphkap
Ly6h5	3.72939e-31	0.364342	0.991	0.967	7.45879e-28	22	Ly6h
Ecel13	1.73835e-30	0.561417	0.603	0.58	3.47671e-27	22	Ecel1
Sned1	2.78922e-29	0.456989	0.51	0.518	5.57844e-26	22	Sned1
Pcdh101	2.82044e-29	0.347993	0.702	0.586	5.64087e-26	22	Pcdh10
Gpx34	2.36521e-28	0.43628	0.706	0.622	4.73042e-25	22	Gpx3
Hap15	2.42449e-28	0.332225	0.965	0.943	4.84899e-25	22	Hap1
Ahi14	4.54049e-28	0.305625	0.996	0.986	9.08098e-25	22	Ahi1
Rps193	4.71727e-26	0.343711	0.918	0.883	9.43453e-23	22	Rps19
Slc17a64	7.7115e-25	0.395283	0.647	0.577	1.5423e-21	22	Slc17a6
Rpl102	1.73772e-24	0.321054	0.768	0.636	3.47543e-21	22	Rpl10
Ar3	5.80068e-24	0.415885	0.558	0.507	1.16014e-20	22	Ar
Tpt11	1.83637e-22	0.358141	0.753	0.703	3.67275e-19	22	Tpt1
Tmem471	1.9491e-22	0.406616	0.57	0.506	3.89821e-19	22	Tmem47
Greb1	3.96282e-22	0.573509	0.51	0.525	7.92564e-19	22	Greb1
Rpl33	8.17008e-22	0.32109	0.947	0.915	1.63402e-18	22	Rpl3
App4	4.22631e-20	0.282507	0.949	0.961	8.45261e-17	22	App
Map22	1.00816e-19	0.290254	0.943	0.948	2.01633e-16	22	Map2
Rasd11	1.54525e-19	0.505407	0.45	0.444	3.0905e-16	22	Rasd1
Rpl233	6.68402e-19	0.29152	0.943	0.918	1.3368e-15	22	Rpl23
Col24a1	1.00244e-18	0.626341	0.38	0.341	2.00488e-15	22	Col24a1
Rpl84	4.83127e-18	0.294722	0.912	0.91	9.66254e-15	22	Rpl8
Rps83	8.88866e-18	0.280131	0.965	0.949	1.77773e-14	22	Rps8
Rpl94	2.49506e-17	0.275315	0.965	0.952	4.99011e-14	22	Rpl9
Prkacb2	4.73043e-17	0.264949	0.905	0.902	9.46085e-14	22	Prkacb
Rpl34	1.04212e-16	0.266146	0.757	0.695	2.08424e-13	22	Rpl34
Cited12	1.96306e-16	0.286427	0.51	0.524	3.92612e-13	22	Cited1
Hs6st22	7.51107e-16	0.292716	0.521	0.477	1.50221e-12	22	Hs6st2
Rps122	1.68628e-15	0.293608	0.806	0.759	3.37256e-12	22	Rps12
Miat5	1.68982e-15	0.351512	0.658	0.631	3.37965e-12	22	Miat
Lsamp3	4.58591e-15	0.27818	0.839	0.797	9.17181e-12	22	Lsamp
Ptma2	6.65338e-15	0.255312	0.702	0.658	1.33068e-11	22	Ptma
Nr5a2	7.71895e-15	0.432851	0.402	0.443	1.54379e-11	22	Nr5a2
Rps3a12	1.38983e-14	0.277398	0.826	0.834	2.77967e-11	22	Rps3a1
Tmsb10	1.97493e-13	0.292545	0.753	0.723	3.94986e-10	22	Tmsb10
Rpl27a3	2.57291e-13	0.261171	0.907	0.893	5.14582e-10	22	Rpl27a
Rxfp1	4.37115e-13	0.773786	0.47	0.535	8.7423e-10	22	Rxfp1
Rps27a3	5.83751e-13	0.253403	0.927	0.936	1.1675e-09	22	Rps27a
Ptprn3	6.75928e-12	0.256836	0.779	0.77	1.35186e-08	22	Ptprn
Chpt13	1.27948e-11	0.25119	0.472	0.491	2.55896e-08	22	Chpt1
Grk32	5.13228e-11	0.357612	0.532	0.577	1.02646e-07	22	Grk3
Pcdh75	1.23803e-10	0.253059	0.709	0.772	2.47606e-07	22	Pcdh7
Gfra11	3.00187e-10	0.296133	0.351	0.389	6.00373e-07	22	Gfra1
H2-Q21	3.85576e-09	0.296385	0.38	0.421	7.71153e-06	22	H2-Q2
Pomc1	6.51823e-08	0.281997	0.278	0.567	0.000130365	22	Pomc
Pde10a1	1.61911e-07	0.2963	0.477	0.557	0.000323821	22	Pde10a
Pou2f2	1.18334e-06	0.337713	0.422	0.508	0.00236669	22	Pou2f2
Sv2c2	8.91228e-06	0.365879	0.479	0.599	0.0178246	22	Sv2c
Parm12	1.59021e-05	0.357665	0.519	0.625	0.0318043	22	Parm1
Laptm5	5.82702e-95	0.986495	0.704	0.329	1.1654e-91	23	Laptm5
Cst35	3.56205e-91	0.871852	0.991	0.932	7.1241e-88	23	Cst3
Cx3cr1	2.57375e-86	0.818281	0.711	0.42	5.14751e-83	23	Cx3cr1
Hexb	1.21302e-79	0.990116	0.757	0.492	2.42605e-76	23	Hexb
P2ry12	1.89346e-76	0.529891	0.645	0.381	3.78691e-73	23	P2ry12
Ctsd	4.61217e-75	0.861205	0.865	0.607	9.22433e-72	23	Ctsd
Fcrls	1.16173e-71	0.538168	0.634	0.355	2.32346e-68	23	Fcrls
Vsir	2.52813e-64	0.516876	0.609	0.348	5.05625e-61	23	Vsir
Ptgs1	6.02486e-60	0.448913	0.636	0.422	1.20497e-56	23	Ptgs1
Hpgds	9.48693e-56	0.493523	0.598	0.348	1.89739e-52	23	Hpgds
Lair1	1.58455e-55	0.470293	0.62	0.378	3.16909e-52	23	Lair1
C1qb	3.36195e-53	0.865874	0.662	0.384	6.72389e-50	23	C1qb
Tgfbr1	1.35685e-52	0.549404	0.647	0.435	2.7137e-49	23	Tgfbr1
Csf1r	5.30122e-51	0.721742	0.611	0.321	1.06024e-47	23	Csf1r
Fyb	1.69616e-49	0.313249	0.563	0.336	3.39233e-46	23	Fyb
Siglech	5.46252e-49	0.56814	0.556	0.266	1.0925e-45	23	Siglech
Mertk	2.65531e-46	0.280384	0.605	0.448	5.31062e-43	23	Mertk
Arhgap45	8.58295e-46	0.407249	0.567	0.342	1.71659e-42	23	Arhgap45
Ly86	7.989e-45	0.432565	0.558	0.281	1.5978e-41	23	Ly86
Slco2b1	8.0583e-39	0.305935	0.481	0.22	1.61166e-35	23	Slco2b1
Rrbp11	5.62185e-34	0.415835	0.68	0.503	1.12437e-30	23	Rrbp1
C1qc	3.70592e-33	0.672593	0.565	0.38	7.41185e-30	23	C1qc
Inpp5d	8.51297e-33	0.307958	0.57	0.431	1.70259e-29	23	Inpp5d
Il6ra	2.79759e-32	0.25127	0.536	0.393	5.59519e-29	23	Il6ra
Mpeg1	6.06148e-31	0.328385	0.514	0.361	1.2123e-27	23	Mpeg1
mt-Co17	3.87709e-28	0.341617	1	1	7.75418e-25	23	mt-Co1
Cyth4	5.08263e-27	0.445895	0.528	0.351	1.01653e-23	23	Cyth4
C1qa	6.67129e-27	0.682202	0.576	0.422	1.33426e-23	23	C1qa
Ptprc	1.31963e-25	0.38454	0.539	0.441	2.63925e-22	23	Ptprc
mt-Nd13	6.37821e-25	0.343116	1	0.99	1.27564e-21	23	mt-Nd1
Mef2c1	8.99236e-25	0.395833	0.687	0.57	1.79847e-21	23	Mef2c
Fgd2	2.22196e-23	0.294993	0.453	0.235	4.44391e-20	23	Fgd2
Epb41l21	3.84478e-23	0.45114	0.585	0.457	7.68957e-20	23	Epb41l2
Ctss	4.38108e-22	0.652671	0.556	0.43	8.76216e-19	23	Ctss
Csf3r	3.77564e-20	0.2758	0.49	0.36	7.55128e-17	23	Csf3r
Stab1	2.28934e-19	0.317909	0.483	0.367	4.57869e-16	23	Stab1
mt-Nd25	3.40472e-19	0.292896	0.998	0.995	6.80944e-16	23	mt-Nd2
Mafb	1.16537e-18	0.291207	0.499	0.403	2.33074e-15	23	Mafb
Zeb23	2.92056e-18	0.294536	0.55	0.399	5.84112e-15	23	Zeb2
Itgb51	3.85958e-18	0.310628	0.532	0.436	7.71916e-15	23	Itgb5
Selplg	8.39813e-18	0.547497	0.51	0.378	1.67963e-14	23	Selplg
Sparc3	1.07578e-17	0.337215	0.786	0.673	2.15156e-14	23	Sparc
Slc1a24	3.84796e-17	0.259576	0.94	0.82	7.69592e-14	23	Slc1a2
Pou2f21	9.77841e-15	0.282606	0.594	0.506	1.95568e-11	23	Pou2f2
Pld4	3.4598e-13	0.416295	0.514	0.455	6.91961e-10	23	Pld4
Apbb1ip	7.12027e-13	0.310058	0.488	0.403	1.42405e-09	23	Apbb1ip
Ifngr1	7.98027e-13	0.262686	0.481	0.41	1.59605e-09	23	Ifngr1
mt-Nd55	1.12127e-12	0.25885	0.94	0.922	2.24254e-09	23	mt-Nd5
Gpr34	8.04092e-12	0.264849	0.4	0.266	1.60818e-08	23	Gpr34
Plxdc21	2.51905e-11	0.326265	0.547	0.456	5.0381e-08	23	Plxdc2
Adap2	2.61138e-11	0.255967	0.501	0.471	5.22276e-08	23	Adap2
Kctd12	5.96308e-11	0.278852	0.49	0.398	1.19262e-07	23	Kctd12
Itgam	4.71986e-10	0.250573	0.415	0.278	9.43972e-07	23	Itgam
Ltc4s	1.41004e-07	0.251768	0.307	0.42	0.000282008	23	Ltc4s
Trem2	6.12781e-07	0.438777	0.435	0.318	0.00122556	23	Trem2
Olfml3	3.58697e-06	0.392362	0.446	0.386	0.00717393	23	Olfml3
Unc93b1	6.70116e-05	0.345353	0.459	0.438	0.134023	23	Unc93b1
Cd37	0.000131676	0.278891	0.415	0.368	0.263352	23	Cd37
Ctsz	0.000499014	0.328195	0.415	0.357	0.998028	23	Ctsz
Malat18	1.98703e-153	1.07001	1	1	3.97407e-150	24	Malat1
Gria26	2.33052e-149	1.19636	0.997	0.971	4.66104e-146	24	Gria2
Zbtb205	2.8192e-128	1.14308	0.992	0.929	5.6384e-125	24	Zbtb20
Tac13	1.39247e-97	1.43667	0.827	0.735	2.78495e-94	24	Tac1
Rreb12	1.99577e-86	1.4832	0.745	0.647	3.99154e-83	24	Rreb1
Bcl11b1	3.55865e-73	1.28358	0.729	0.681	7.11731e-70	24	Bcl11b
Slc24a23	3.56969e-67	1.08008	0.67	0.537	7.13938e-64	24	Slc24a2
Meg39	4.599e-62	0.694956	1	0.996	9.19801e-59	24	Meg3
Syt6	5.77496e-60	1.0616	0.561	0.451	1.15499e-56	24	Syt6
Nrxn35	6.05009e-58	0.756589	0.832	0.72	1.21002e-54	24	Nrxn3
Map23	2.80907e-53	0.613791	0.963	0.948	5.61815e-50	24	Map2
Pde1a1	1.66087e-46	0.853191	0.569	0.506	3.32174e-43	24	Pde1a
Ogt3	1.94492e-46	0.842029	0.705	0.656	3.88983e-43	24	Ogt
Auts24	3.75601e-45	0.830179	0.633	0.585	7.51203e-42	24	Auts2
Cplx22	1.63637e-44	0.920625	0.689	0.685	3.27275e-41	24	Cplx2
Nrp21	8.00443e-42	0.885973	0.574	0.545	1.60089e-38	24	Nrp2
Gad24	2.95473e-31	0.553707	0.705	0.636	5.90947e-28	24	Gad2
Bcl11a2	3.35518e-31	0.860621	0.564	0.587	6.71036e-28	24	Bcl11a
Camk2n12	1.96405e-30	0.636482	0.612	0.606	3.9281e-27	24	Camk2n1
Pou3f11	2.20038e-29	0.561837	0.34	0.373	4.40077e-26	24	Pou3f1
Msi24	1.3735e-27	0.690026	0.638	0.668	2.74699e-24	24	Msi2
Son5	2.43704e-27	0.560295	0.814	0.888	4.87408e-24	24	Son
Pcdh11x2	1.70196e-24	0.493705	0.418	0.448	3.40392e-21	24	Pcdh11x
Itm2c4	6.87127e-23	0.418255	0.955	0.939	1.37425e-19	24	Itm2c
Fat31	8.5097e-23	0.729988	0.527	0.589	1.70194e-19	24	Fat3
Isl14	1.34853e-22	0.709217	0.545	0.613	2.69707e-19	24	Isl1
Syt13	6.14087e-21	0.356015	0.91	0.874	1.22817e-17	24	Syt1
Col11a11	2.69563e-20	0.71752	0.476	0.543	5.39127e-17	24	Col11a1
Tyro31	6.49124e-19	0.341078	0.261	0.369	1.29825e-15	24	Tyro3
Npy1r1	8.08623e-19	0.803162	0.457	0.547	1.61725e-15	24	Npy1r
Pcp4l12	1.3412e-18	0.615865	0.354	0.441	2.68239e-15	24	Pcp4l1
Atp2b43	9.53378e-18	0.613366	0.516	0.598	1.90676e-14	24	Atp2b4
Syne11	1.27954e-17	0.459551	0.721	0.846	2.55909e-14	24	Syne1
Kcnk23	1.46506e-16	0.27608	0.324	0.424	2.93011e-13	24	Kcnk2
Grin3a1	2.43489e-16	0.421621	0.386	0.468	4.86978e-13	24	Grin3a
[truncated: 795 more rows]
