# Supplementary material for: Cell-specific transcriptome changes in the hypothalamic arcuate nucleus in a mouse deoxycorticosterone acetate-salt model of hypertension
Source: Front Cell Neurosci. 2023 May 24;17:1207350. doi: 10.3389/fncel.2023.1207350 (PMC10244568; doi:10.3389/fncel.2023.1207350)
Supplement: Supplementary file 2 [file Data_Sheet_2.XLSX]

## Sheet: Table S6 Neuropep Sub Mrkr Gns
	p_val	avg_log2FC	pct.1	pct.2	p_val_adj	cluster	gene
Sst	1.26033e-159	2.8085	0.842	0.428	2.52065e-156	0	Sst
Otp	3.99695e-77	0.645293	0.78	0.44	7.9939e-74	0	Otp
Serpini1	1.25984e-42	0.329295	0.697	0.417	2.51969e-39	0	Serpini1
Gpr101	6.34531e-41	0.510603	0.713	0.429	1.26906e-37	0	Gpr101
Pcsk2	1.99065e-38	0.36662	0.634	0.312	3.9813e-35	0	Pcsk2
Itih3	6.08968e-36	0.355346	0.52	0.212	1.21794e-32	0	Itih3
Dpp10	1.69362e-34	0.283802	0.632	0.349	3.38724e-31	0	Dpp10
Pcsk1n	1.43821e-32	0.303561	1	0.991	2.87642e-29	0	Pcsk1n
Pnoc	2.56902e-29	0.297764	0.544	0.291	5.13803e-26	0	Pnoc
Apoe	1.50931e-28	0.582662	0.769	0.595	3.01863e-25	0	Apoe
Calb2	9.21542e-25	0.361107	0.622	0.371	1.84308e-21	0	Calb2
Slc1a3	3.825e-24	0.283198	0.542	0.269	7.65001e-21	0	Slc1a3
Fam46a	2.28338e-23	0.313041	0.52	0.275	4.56677e-20	0	Fam46a
Cst3	7.78098e-18	0.37023	0.943	0.892	1.5562e-14	0	Cst3
Dlk1	8.28908e-18	0.362975	0.922	0.74	1.65782e-14	0	Dlk1
Cadm1	9.38114e-18	0.270771	0.829	0.67	1.87623e-14	0	Cadm1
Scg2	4.73871e-17	0.268234	0.946	0.842	9.47742e-14	0	Scg2
Ptgds	7.48331e-17	0.277773	0.565	0.376	1.49666e-13	0	Ptgds
Slc1a2	1.29194e-16	0.409492	0.741	0.608	2.58388e-13	0	Slc1a2
Gal	3.00362e-16	-0.448306	0.256	0.331	6.00723e-13	0	Gal
Nrgn	4.95231e-16	0.264713	0.578	0.346	9.90462e-13	0	Nrgn
Sparc	1.90813e-15	0.303898	0.73	0.546	3.81626e-12	0	Sparc
Prlr	2.9883e-13	-0.418316	0.534	0.571	5.97659e-10	0	Prlr
Ndrg2	3.85e-13	0.26451	0.676	0.508	7.69999e-10	0	Ndrg2
Ncald	7.20263e-11	0.250295	0.748	0.613	1.44053e-07	0	Ncald
Tac2	2.27873e-10	-0.395229	0.256	0.288	4.55747e-07	0	Tac2
Gm47283	3.38551e-10	-0.303516	0.956	0.964	6.77102e-07	0	Gm47283
Atp1a2	1.37333e-09	0.424885	0.593	0.46	2.74665e-06	0	Atp1a2
Slc6a11	9.13488e-09	0.291514	0.484	0.293	1.82698e-05	0	Slc6a11
Sparcl1	2.95283e-08	0.271991	0.611	0.447	5.90566e-05	0	Sparcl1
Ghrh	1.07241e-07	-0.602948	0.311	0.312	0.000214483	0	Ghrh
Agt	3.83056e-06	0.345466	0.42	0.248	0.00766112	0	Agt
Plp1	2.25687e-05	0.538095	0.433	0.304	0.0451374	0	Plp1
Lamp5	2.77135e-71	0.410258	0.656	0.418	5.54269e-68	1	Lamp5
Pcsk1n.1	1.22814e-66	-0.58656	0.969	0.996	2.45628e-63	1	Pcsk1n
Hhip	4.46698e-56	0.255736	0.538	0.369	8.93396e-53	1	Hhip
Prlr.1	8.6334e-55	0.53366	0.792	0.523	1.72668e-51	1	Prlr
Zfhx4	8.2279e-38	0.359692	0.563	0.314	1.64558e-34	1	Zfhx4
Ptprz1	3.33132e-37	0.48017	0.805	0.622	6.66264e-34	1	Ptprz1
Penk	1.76415e-36	0.265616	0.519	0.305	3.5283e-33	1	Penk
Tcf7l2	9.02091e-36	0.318464	0.522	0.357	1.80418e-32	1	Tcf7l2
Otp.1	7.88208e-33	-0.531032	0.296	0.529	1.57642e-29	1	Otp
Gnas	1.66572e-32	-0.328468	0.993	0.996	3.33144e-29	1	Gnas
Alcam	3.10842e-31	0.410565	0.689	0.465	6.21685e-28	1	Alcam
Npy	7.33451e-30	-1.26984	0.29	0.519	1.4669e-26	1	Npy
Sv2c	1.40258e-28	0.359639	0.661	0.501	2.80515e-25	1	Sv2c
Atp2b1	1.0101e-27	0.384976	0.856	0.693	2.02021e-24	1	Atp2b1
Tmem35a	2.18409e-27	0.389416	0.648	0.455	4.36817e-24	1	Tmem35a
Lrp1b	8.36776e-27	0.327681	0.597	0.387	1.67355e-23	1	Lrp1b
Gabrg1	1.44955e-24	0.27149	0.735	0.559	2.89909e-21	1	Gabrg1
Gpr101.1	4.28097e-23	0.408118	0.624	0.446	8.56195e-20	1	Gpr101
Hcn1	1.29214e-21	0.272131	0.55	0.372	2.58428e-18	1	Hcn1
Agrp	3.32193e-20	-1.14071	0.488	0.614	6.64386e-17	1	Agrp
Calb1	3.4252e-18	0.290546	0.638	0.474	6.85039e-15	1	Calb1
Npy1r	6.06572e-18	0.330477	0.527	0.372	1.21314e-14	1	Npy1r
Pcdh17	2.52199e-17	0.311583	0.787	0.688	5.04399e-14	1	Pcdh17
Edil3	1.17891e-16	0.253214	0.64	0.502	2.35781e-13	1	Edil3
Rab3c	1.69649e-16	0.278142	0.931	0.832	3.39299e-13	1	Rab3c
Zdbf2	2.08202e-16	0.321887	0.795	0.722	4.16405e-13	1	Zdbf2
Vgf	3.05031e-13	0.301661	0.556	0.412	6.10061e-10	1	Vgf
Pomc	9.72266e-13	-0.365869	0.519	0.416	1.94453e-09	1	Pomc
Gal.1	1.28292e-12	-0.461093	0.203	0.341	2.56584e-09	1	Gal
Pclo	3.28807e-12	0.251413	0.818	0.753	6.57613e-09	1	Pclo
Ghrh.1	5.68494e-11	-0.696427	0.209	0.33	1.13699e-07	1	Ghrh
Dlk1.1	6.88991e-10	-0.259894	0.671	0.786	1.37798e-06	1	Dlk1
Serpina3n	2.96983e-05	-0.408288	0.535	0.591	0.0593967	1	Serpina3n
Agrp.1	1.62617e-246	2.36404	0.972	0.536	3.25233e-243	2	Agrp
Npy.1	1.42018e-235	2.42993	0.951	0.411	2.84036e-232	2	Npy
Pcsk1n.2	1.03027e-92	0.683704	1	0.991	2.06054e-89	2	Pcsk1n
Prune2	4.54182e-83	0.755342	0.824	0.56	9.08364e-80	2	Prune2
Meg3	1.14425e-75	-0.725005	1	0.999	2.28851e-72	2	Meg3
Otp.2	5.03571e-71	0.628089	0.75	0.453	1.00714e-67	2	Otp
Prlr.2	4.92481e-66	-0.678544	0.159	0.628	9.84961e-63	2	Prlr
Brinp3	3.48249e-65	-0.277531	0.07	0.493	6.96498e-62	2	Brinp3
Acvr1c	9.47706e-63	0.766585	0.718	0.522	1.89541e-59	2	Acvr1c
Tenm1	2.53217e-57	-0.551569	0.116	0.544	5.06434e-54	2	Tenm1
Parm1	1.42821e-49	-0.419443	0.199	0.605	2.85642e-46	2	Parm1
Kcnk9	2.54528e-46	0.593482	0.653	0.446	5.09056e-43	2	Kcnk9
Esr1	1.65432e-43	-0.263271	0.072	0.436	3.30864e-40	2	Esr1
Plagl1	3.48504e-43	0.51698	0.706	0.519	6.97007e-40	2	Plagl1
Serpina3n.1	4.88546e-43	0.561905	0.727	0.559	9.77092e-40	2	Serpina3n
Syt1	8.02309e-39	-0.575099	0.509	0.772	1.60462e-35	2	Syt1
Irs4	1.06077e-38	0.516846	0.756	0.599	2.12154e-35	2	Irs4
Csgalnact1	2.82194e-38	0.361286	0.441	0.3	5.64387e-35	2	Csgalnact1
Rnf128	6.9459e-37	-0.315737	0.229	0.554	1.38918e-33	2	Rnf128
Calb1.1	6.46883e-34	-0.518339	0.21	0.545	1.29377e-30	2	Calb1
Zfhx3	9.49479e-34	0.401907	0.695	0.504	1.89896e-30	2	Zfhx3
App	2.84665e-31	-0.426702	0.884	0.943	5.69331e-28	2	App
Pcdh9	4.50088e-31	0.428028	0.722	0.588	9.00176e-28	2	Pcdh9
Pgr15l	1.02261e-29	0.286946	0.43	0.303	2.04523e-26	2	Pgr15l
Cartpt	8.39668e-29	-1.05324	0.305	0.588	1.67934e-25	2	Cartpt
Npy1r.1	6.21864e-27	-0.250374	0.125	0.438	1.24373e-23	2	Npy1r
Pcdh10	7.71845e-27	-0.391982	0.231	0.57	1.54369e-23	2	Pcdh10
Vgll3	4.90859e-26	-0.281652	0.102	0.424	9.81719e-23	2	Vgll3
Tmem35a.1	2.19599e-25	-0.359442	0.21	0.527	4.39198e-22	2	Tmem35a
Srrm2	5.65065e-25	0.375266	0.941	0.918	1.13013e-21	2	Srrm2
Dmd	9.06754e-25	0.369311	0.68	0.579	1.81351e-21	2	Dmd
Itm2c	1.06667e-23	-0.352699	0.835	0.926	2.13335e-20	2	Itm2c
Nnat	4.65507e-23	-0.381679	0.487	0.726	9.31014e-20	2	Nnat
Chgb	5.27375e-23	-0.372054	0.369	0.634	1.05475e-19	2	Chgb
Auts2	1.22136e-22	0.418022	0.606	0.502	2.44272e-19	2	Auts2
Gpr101.2	1.78352e-22	-0.491639	0.233	0.511	3.56704e-19	2	Gpr101
Ahi1	3.47889e-21	-0.269271	0.975	0.991	6.95779e-18	2	Ahi1
Pcdh19	4.60969e-21	-0.41263	0.189	0.512	9.21937e-18	2	Pcdh19
Arhgap6	5.05028e-21	0.378217	0.646	0.553	1.01006e-17	2	Arhgap6
Edil3.1	4.33026e-20	-0.356704	0.303	0.557	8.66053e-17	2	Edil3
Opcml	6.07115e-20	-0.308439	0.241	0.518	1.21423e-16	2	Opcml
Tuba1a	7.49692e-20	-0.347078	0.653	0.808	1.49938e-16	2	Tuba1a
Cpne7	1.458e-19	-0.259174	0.28	0.536	2.91601e-16	2	Cpne7
Alcam.1	5.07946e-19	-0.39114	0.271	0.535	1.01589e-15	2	Alcam
Gria3	5.86535e-19	-0.406727	0.386	0.611	1.17307e-15	2	Gria3
Lrp1b.1	1.5712e-18	-0.339358	0.161	0.46	3.1424e-15	2	Lrp1b
Npy2r	1.5874e-18	0.393402	0.426	0.316	3.17479e-15	2	Npy2r
Atp2b1.1	1.66189e-18	-0.349426	0.53	0.748	3.32377e-15	2	Atp2b1
Snap25	2.47548e-18	-0.332043	0.727	0.848	4.95097e-15	2	Snap25
Pcdh11x	5.66754e-18	-0.360904	0.165	0.449	1.13351e-14	2	Pcdh11x
Ckb	1.90797e-17	-0.313638	0.716	0.851	3.81595e-14	2	Ckb
Vgf.1	6.40211e-16	-0.528258	0.212	0.469	1.28042e-12	2	Vgf
Bex2	6.44807e-16	-0.260213	0.896	0.951	1.28961e-12	2	Bex2
Gap43	7.02183e-16	-0.291893	0.544	0.749	1.40437e-12	2	Gap43
Six3	7.24846e-16	-0.268667	0.195	0.443	1.44969e-12	2	Six3
Cited1	1.31207e-15	0.304408	0.661	0.596	2.62414e-12	2	Cited1
Prkacb	1.86131e-15	-0.256044	0.803	0.917	3.72263e-12	2	Prkacb
Dner	7.14072e-15	-0.326609	0.373	0.594	1.42814e-11	2	Dner
Ntm	2.00408e-14	-0.292283	0.312	0.558	4.00815e-11	2	Ntm
Kcnk2	2.07082e-14	0.285985	0.612	0.528	4.14164e-11	2	Kcnk2
Vsnl1	4.0344e-14	-0.320681	0.237	0.493	8.0688e-11	2	Vsnl1
Gm47283.1	2.34051e-13	0.311861	0.96	0.963	4.68102e-10	2	Gm47283
Pomc.1	2.7228e-13	-1.56301	0.235	0.462	5.44561e-10	2	Pomc
Unc5d	6.06198e-13	0.296919	0.697	0.654	1.2124e-09	2	Unc5d
St8sia4	6.7395e-12	0.32404	0.46	0.396	1.3479e-08	2	St8sia4
Ptprk	1.37182e-11	0.329387	0.527	0.48	2.74363e-08	2	Ptprk
Pitpnc1	3.71807e-11	0.328984	0.517	0.472	7.43615e-08	2	Pitpnc1
Tac2.1	3.95688e-10	-0.723199	0.068	0.317	7.91377e-07	2	Tac2
Crabp1	6.94371e-10	-0.268175	0.148	0.374	1.38874e-06	2	Crabp1
Grm5	4.26548e-08	-0.324922	0.295	0.494	8.53096e-05	2	Grm5
Car10	8.99282e-08	0.270617	0.411	0.369	0.000179856	2	Car10
Slc1a2.1	1.1175e-07	-0.250879	0.494	0.65	0.0002235	2	Slc1a2
Rasgrp1	1.26385e-07	0.34494	0.483	0.465	0.000252771	2	Rasgrp1
Nrgn.1	4.887e-07	-0.258565	0.205	0.41	0.000977399	2	Nrgn
Gal.2	1.66714e-06	-0.569295	0.136	0.348	0.00333428	2	Gal
Asb4	1.4736e-05	-0.289441	0.523	0.639	0.0294721	2	Asb4
Hpcal1	2.34628e-05	-0.287688	0.195	0.394	0.0469256	2	Hpcal1
Ghrh.2	9.96868e-05	-0.837383	0.17	0.334	0.199374	2	Ghrh
Corin	0.000245986	0.274555	0.362	0.377	0.491973	2	Corin
Syt1.1	1.64786e-69	0.775703	0.94	0.712	3.29573e-66	3	Syt1
Six3.1	3.81841e-68	0.645908	0.737	0.37	7.63682e-65	3	Six3
Col25a1	2.72852e-58	0.787944	0.68	0.373	5.45704e-55	3	Col25a1
Ncdn	9.43438e-57	0.659636	0.752	0.439	1.88688e-53	3	Ncdn
Snca	5.18891e-56	0.620577	0.68	0.388	1.03778e-52	3	Snca
Hpcal1.1	8.90855e-54	0.582277	0.661	0.332	1.78171e-50	3	Hpcal1
Cited1.1	7.64294e-49	-0.557797	0.272	0.645	1.52859e-45	3	Cited1
Vsnl1.1	6.58315e-48	0.549745	0.714	0.428	1.31663e-44	3	Vsnl1
Celf2	1.28645e-46	0.575028	0.778	0.514	2.5729e-43	3	Celf2
Serpina3n.2	1.49862e-45	-0.57491	0.284	0.618	2.99725e-42	3	Serpina3n
Agrp.2	4.1938e-44	-1.27341	0.313	0.628	8.3876e-41	3	Agrp
Syn2	5.15094e-43	0.514861	0.847	0.598	1.03019e-39	3	Syn2
Meg3.1	1.53847e-40	0.492374	1	0.999	3.07693e-37	3	Meg3
Gria3.1	3.22429e-40	0.608069	0.759	0.56	6.44859e-37	3	Gria3
Grin3a	6.66348e-39	0.437992	0.566	0.3	1.3327e-35	3	Grin3a
Thy1	8.62946e-39	0.548025	0.666	0.407	1.72589e-35	3	Thy1
Pde1a	6.59502e-38	0.365678	0.551	0.312	1.319e-34	3	Pde1a
Otp.3	4.0143e-37	0.350356	0.749	0.462	8.02861e-34	3	Otp
Bcl11b	2.2474e-36	0.454736	0.589	0.424	4.49479e-33	3	Bcl11b
Ppp3ca	4.47563e-36	0.519197	0.888	0.768	8.95127e-33	3	Ppp3ca
Bcl11a	1.64954e-35	0.329487	0.484	0.247	3.29908e-32	3	Bcl11a
Pcdh19.1	1.86203e-35	0.383362	0.702	0.441	3.72405e-32	3	Pcdh19
Rtn1	5.88641e-34	0.364804	0.99	0.974	1.17728e-30	3	Rtn1
Dlk1.2	1.54696e-33	0.492437	0.919	0.75	3.09393e-30	3	Dlk1
Slc32a1	2.19157e-33	0.470843	0.697	0.472	4.38313e-30	3	Slc32a1
Psap	1.52629e-32	0.383487	0.979	0.928	3.05257e-29	3	Psap
2900097C17Rik	1.08728e-30	0.414355	0.933	0.819	2.17457e-27	3	2900097C17Rik
Cadm2	2.0065e-30	0.452315	0.585	0.35	4.01299e-27	3	Cadm2
Gad2	2.39892e-30	0.477431	0.835	0.655	4.79784e-27	3	Gad2
Nrgn.2	5.23948e-30	0.550622	0.587	0.358	1.0479e-26	3	Nrgn
Nrxn3	3.59614e-29	0.41143	0.902	0.7	7.19229e-26	3	Nrxn3
Htr2c	2.27793e-28	0.356009	0.489	0.319	4.55586e-25	3	Htr2c
Atp2b4	3.14106e-28	0.472721	0.623	0.419	6.28213e-25	3	Atp2b4
Gda	9.48842e-28	0.438996	0.623	0.421	1.89768e-24	3	Gda
Zfhx3.1	1.25487e-27	-0.476318	0.229	0.566	2.50975e-24	3	Zfhx3
Plagl1.1	7.12534e-27	-0.488903	0.291	0.575	1.42507e-23	3	Plagl1
C130073E24Rik	3.92828e-26	0.453518	0.613	0.44	7.85656e-23	3	C130073E24Rik
Cartpt.1	8.60799e-26	-1.2784	0.332	0.576	1.7216e-22	3	Cartpt
Lmo7	5.13309e-25	0.271923	0.456	0.298	1.02662e-21	3	Lmo7
Tubb2a	7.34137e-25	0.354035	0.878	0.776	1.46827e-21	3	Tubb2a
Msi2	2.04277e-24	-0.381451	0.389	0.655	4.08554e-21	3	Msi2
Sv2c.1	4.89946e-24	-0.263	0.291	0.554	9.79892e-21	3	Sv2c
Snap25.1	4.92491e-24	0.410414	0.9	0.824	9.84981e-21	3	Snap25
Gria2	1.9497e-23	0.339374	0.971	0.942	3.8994e-20	3	Gria2
mt-Co1	3.16515e-23	-0.31723	1	1	6.3303e-20	3	mt-Co1
Pcdh7	4.43866e-23	0.392948	0.89	0.769	8.87731e-20	3	Pcdh7
Cst3.1	6.32682e-23	-0.439089	0.785	0.914	1.26536e-19	3	Cst3
Gap43.1	3.36353e-22	0.369284	0.831	0.708	6.72706e-19	3	Gap43
Calm2	4.35782e-22	0.312199	0.981	0.944	8.71563e-19	3	Calm2
Arhgap36	3.45956e-21	0.423923	0.618	0.459	6.91913e-18	3	Arhgap36
Scg2.1	4.79285e-21	-0.389045	0.737	0.873	9.58571e-18	3	Scg2
Dpp10.1	1.29917e-20	0.401488	0.556	0.374	2.59834e-17	3	Dpp10
Cplx2	2.00518e-20	0.336793	0.654	0.499	4.01035e-17	3	Cplx2
Npy.2	2.08009e-20	-1.35661	0.267	0.509	4.16018e-17	3	Npy
Gnas.1	5.2942e-20	0.253241	1	0.995	1.05884e-16	3	Gnas
Itm2c.1	1.32558e-19	0.321932	0.94	0.911	2.65116e-16	3	Itm2c
Gpx3	1.33428e-19	-0.384078	0.551	0.75	2.66856e-16	3	Gpx3
Epha5	1.76269e-19	0.364748	0.644	0.479	3.52538e-16	3	Epha5
Gabra1	5.90391e-19	0.293564	0.494	0.323	1.18078e-15	3	Gabra1
Tbx3	5.19505e-18	-0.295201	0.286	0.528	1.03901e-14	3	Tbx3
Rbms3	1.69981e-17	-0.320557	0.353	0.578	3.39963e-14	3	Rbms3
Slc6a1	4.8295e-17	0.251091	0.52	0.354	9.659e-14	3	Slc6a1
Eef1a1	1.83641e-16	-0.259369	0.981	0.994	3.67282e-13	3	Eef1a1
Arpp21	2.04152e-16	0.476644	0.527	0.415	4.08304e-13	3	Arpp21
Atp1a1	3.18765e-16	-0.338404	0.64	0.804	6.3753e-13	3	Atp1a1
Rpl27a	4.99964e-16	-0.313753	0.85	0.893	9.99927e-13	3	Rpl27a
Grm5.1	6.33264e-16	0.361136	0.621	0.449	1.26653e-12	3	Grm5
Rpl37a	1.84534e-15	-0.297244	0.831	0.923	3.69069e-12	3	Rpl37a
Asb4.1	5.20734e-15	-0.594255	0.516	0.636	1.04147e-11	3	Asb4
Irs4.1	6.12292e-15	-0.398281	0.47	0.638	1.22458e-11	3	Irs4
mt-Nd1	7.31652e-15	-0.312178	0.964	0.983	1.4633e-11	3	mt-Nd1
Gm45159	1.05153e-14	0.322953	0.623	0.491	2.10306e-11	3	Gm45159
Rps27a	1.24218e-14	-0.286615	0.909	0.934	2.48436e-11	3	Rps27a
Rps8	1.78022e-14	-0.283705	0.909	0.956	3.56044e-11	3	Rps8
Nfib	2.43556e-14	0.254234	0.363	0.24	4.87112e-11	3	Nfib
Stmn1	3.12443e-14	0.289033	0.845	0.755	6.24887e-11	3	Stmn1
6330403K07Rik	7.77163e-14	0.259553	0.962	0.925	1.55433e-10	3	6330403K07Rik
Rps21	1.23395e-13	-0.269919	0.876	0.927	2.46791e-10	3	Rps21
Rpl10	1.24065e-13	-0.313603	0.585	0.737	2.48131e-10	3	Rpl10
Nfix	1.26088e-13	0.273729	0.377	0.261	2.52176e-10	3	Nfix
Tenm1.1	3.45964e-13	0.266106	0.609	0.472	6.91928e-10	3	Tenm1
Ptprz1.1	3.46414e-13	-0.3072	0.47	0.672	6.92827e-10	3	Ptprz1
Fau	9.35454e-13	-0.267209	0.909	0.95	1.87091e-09	3	Fau
Tmsb4x	2.39262e-12	0.259699	0.95	0.895	4.78523e-09	3	Tmsb4x
Parm1.1	3.7181e-12	0.294328	0.652	0.538	7.4362e-09	3	Parm1
Tac2.2	4.11342e-12	-0.697558	0.117	0.303	8.22684e-09	3	Tac2
Rpl23	8.88777e-12	-0.269087	0.866	0.932	1.77755e-08	3	Rpl23
Pomc.2	1.07554e-11	-1.83183	0.267	0.451	2.15108e-08	3	Pomc
Rab3c.1	1.20425e-11	-0.291961	0.747	0.86	2.40851e-08	3	Rab3c
Rpl37	1.27291e-11	-0.258168	0.905	0.939	2.54582e-08	3	Rpl37
Rpl14	1.85665e-11	-0.282797	0.766	0.853	3.71331e-08	3	Rpl14
Cadps2	1.95263e-11	0.280724	0.513	0.394	3.90525e-08	3	Cadps2
Pdyn	3.91043e-11	-0.251796	0.21	0.404	7.82085e-08	3	Pdyn
Camkv	1.09428e-10	0.321961	0.599	0.497	2.18856e-07	3	Camkv
Adgrl2	1.38615e-10	0.302398	0.544	0.454	2.7723e-07	3	Adgrl2
Npy1r.2	2.12239e-10	-0.271425	0.227	0.416	4.24477e-07	3	Npy1r
Rps20	3.1828e-10	-0.269152	0.749	0.842	6.36559e-07	3	Rps20
Rps11	6.17333e-10	-0.25972	0.749	0.833	1.23467e-06	3	Rps11
Vgf.2	2.41702e-09	-0.426833	0.27	0.455	4.83404e-06	3	Vgf
Ghrh.3	1.02106e-08	-0.838237	0.167	0.329	2.04213e-05	3	Ghrh
Tpt1	1.07762e-08	-0.268079	0.666	0.73	2.15524e-05	3	Tpt1
Nnat.1	9.09059e-08	-0.274456	0.587	0.707	0.000181812	3	Nnat
Resp18	1.63048e-06	-0.267108	0.776	0.808	0.00326096	3	Resp18
Gm42418	9.59461e-06	-0.285087	1	1	0.0191892	3	Gm42418
Prune2.1	0.000204975	-0.274329	0.523	0.604	0.409951	3	Prune2
Tac2.3	3.75617e-174	2.07754	0.865	0.216	7.51235e-171	4	Tac2
Dlk1.3	2.52867e-99	-1.11085	0.271	0.826	5.05733e-96	4	Dlk1
Prlr.3	1.17705e-96	1.00848	0.877	0.529	2.35409e-93	4	Prlr
Tacr3	9.07115e-71	0.538206	0.53	0.238	1.81423e-67	4	Tacr3
Pgrmc1	1.45997e-61	0.672777	0.968	0.921	2.91995e-58	4	Pgrmc1
Nrxn3.1	1.02698e-60	-0.775307	0.342	0.765	2.05396e-57	4	Nrxn3
Slc17a6	3.571e-58	0.654434	0.65	0.321	7.14201e-55	4	Slc17a6
Snhg11	3.17296e-55	0.367285	1	0.999	6.34591e-52	4	Snhg11
C230004F18Rik	8.83794e-52	0.77091	0.874	0.672	1.76759e-48	4	C230004F18Rik
Pdyn.1	1.78287e-50	0.662758	0.633	0.354	3.56574e-47	4	Pdyn
Asb4.2	3.9667e-50	-0.730814	0.261	0.665	7.9334e-47	4	Asb4
Gad2.1	8.9078e-49	-0.709056	0.328	0.714	1.78156e-45	4	Gad2
Pcdh11x.1	2.67283e-48	0.709633	0.658	0.382	5.34567e-45	4	Pcdh11x
Isl1	5.75902e-47	-0.514936	0.276	0.647	1.1518e-43	4	Isl1
Sphkap	1.40744e-46	0.578341	0.554	0.28	2.81488e-43	4	Sphkap
Pcdh19.2	2.84767e-44	0.552192	0.707	0.441	5.69533e-41	4	Pcdh19
Calb1.2	8.68825e-42	0.581782	0.729	0.473	1.73765e-38	4	Calb1
Otp.4	9.98543e-39	-0.522725	0.148	0.533	1.99709e-35	4	Otp
Gnas.2	4.77713e-37	-0.447846	0.985	0.997	9.55425e-34	4	Gnas
Kcnk2.1	5.6679e-37	0.578488	0.709	0.52	1.13358e-33	4	Kcnk2
Oprk1	6.79931e-37	0.394998	0.53	0.337	1.35986e-33	4	Oprk1
C1ql2	4.15611e-36	0.337676	0.433	0.278	8.31222e-33	4	C1ql2
Irs4.2	1.65091e-35	-0.532846	0.31	0.656	3.30182e-32	4	Irs4
Slc32a1.1	3.44093e-34	-0.468236	0.158	0.535	6.88187e-31	4	Slc32a1
4933406B17Rik	1.0099e-33	0.572679	0.53	0.365	2.01979e-30	4	4933406B17Rik
Vgll3.1	2.98107e-33	0.51953	0.562	0.359	5.96214e-30	4	Vgll3
Gad1	6.59297e-33	-0.528961	0.217	0.592	1.31859e-29	4	Gad1
Vcan	1.95785e-31	0.313493	0.448	0.312	3.91571e-28	4	Vcan
Serpina3n.3	7.40633e-28	-0.571394	0.374	0.606	1.48127e-24	4	Serpina3n
Rgs2	7.43579e-28	0.535439	0.712	0.577	1.48716e-24	4	Rgs2
Rbms3.1	8.42598e-28	0.459214	0.687	0.538	1.6852e-24	4	Rbms3
Kcnk9.1	9.16141e-28	-0.414729	0.17	0.509	1.83228e-24	4	Kcnk9
Rasgrp1.1	5.94858e-27	-0.274138	0.204	0.498	1.18972e-23	4	Rasgrp1
Sned1	1.41568e-26	0.40676	0.502	0.38	2.83137e-23	4	Sned1
Pcdh10.1	3.13291e-26	0.338856	0.7	0.505	6.26582e-23	4	Pcdh10
Pcsk1n.3	5.97434e-26	-0.436516	0.988	0.993	1.19487e-22	4	Pcsk1n
Atp1b1	1.26695e-25	-0.357153	0.916	0.984	2.5339e-22	4	Atp1b1
Agrp.3	3.91873e-25	-1.18043	0.377	0.62	7.83746e-22	4	Agrp
Plagl1.2	4.32686e-25	-0.402823	0.251	0.578	8.65373e-22	4	Plagl1
Dpp10.2	3.28167e-24	-0.330442	0.106	0.427	6.56334e-21	4	Dpp10
Prune2.2	3.42882e-24	-0.359488	0.315	0.627	6.85764e-21	4	Prune2
Epha5.1	3.92389e-24	-0.443876	0.227	0.528	7.84777e-21	4	Epha5
Sst.1	6.16652e-24	-1.4622	0.222	0.524	1.2333e-20	4	Sst
Col24a1	1.8527e-23	0.679771	0.404	0.21	3.7054e-20	4	Col24a1
Ndn	2.07492e-23	-0.512059	0.879	0.899	4.14983e-20	4	Ndn
Rasd1	2.92088e-23	0.517242	0.453	0.285	5.84176e-20	4	Rasd1
Npy.3	7.53585e-23	-1.28222	0.202	0.516	1.50717e-19	4	Npy
Nell1	9.48794e-23	0.302583	0.495	0.354	1.89759e-19	4	Nell1
Hcn1.1	2.22274e-22	0.253797	0.542	0.384	4.44547e-19	4	Hcn1
Arhgap6.1	2.55794e-22	-0.470846	0.352	0.59	5.11587e-19	4	Arhgap6
Scg2.2	3.32871e-22	0.3627	0.924	0.851	6.65742e-19	4	Scg2
Resp18.1	8.74397e-22	-0.448458	0.623	0.826	1.74879e-18	4	Resp18
Zfhx3.2	4.15355e-21	0.372411	0.658	0.515	8.30709e-18	4	Zfhx3
Gpr101.3	4.59154e-21	-0.38199	0.219	0.503	9.18307e-18	4	Gpr101
Igf1r	3.30073e-20	0.314354	0.534	0.418	6.60145e-17	4	Igf1r
Tmem35a.2	4.18914e-20	0.429151	0.613	0.47	8.37829e-17	4	Tmem35a
Ar	6.66076e-20	0.444199	0.559	0.42	1.33215e-16	4	Ar
Esr1.1	2.37803e-19	0.444837	0.502	0.374	4.75606e-16	4	Esr1
App.1	1.57723e-18	0.32587	0.946	0.934	3.15446e-15	4	App
Pcp4	6.68826e-18	-0.408301	0.448	0.662	1.33765e-14	4	Pcp4
Cartpt.2	8.78964e-18	-1.24542	0.36	0.572	1.75793e-14	4	Cartpt
Ncald.1	1.54944e-17	-0.337444	0.414	0.66	3.09887e-14	4	Ncald
Thy1.1	2.63854e-16	-0.334487	0.177	0.464	5.27709e-13	4	Thy1
Nr5a2	2.8235e-16	0.325277	0.401	0.287	5.647e-13	4	Nr5a2
Itm2c.2	3.04878e-16	0.288819	0.956	0.909	6.09756e-13	4	Itm2c
Tmem47	9.5757e-16	0.392449	0.559	0.442	1.91514e-12	4	Tmem47
Rasgrf2	1.42775e-15	-0.332588	0.256	0.533	2.8555e-12	4	Rasgrf2
Rxfp1	1.68317e-15	0.706506	0.443	0.33	3.36635e-12	4	Rxfp1
Crabp1.1	2.0525e-15	-0.281333	0.108	0.371	4.105e-12	4	Crabp1
Six3.2	2.22386e-15	-0.312336	0.15	0.439	4.44773e-12	4	Six3
Greb1	2.64507e-15	0.450076	0.495	0.389	5.29013e-12	4	Greb1
Rpl3	5.26564e-15	0.295505	0.946	0.899	1.05313e-11	4	Rpl3
Grk3	7.61987e-15	0.383387	0.554	0.451	1.52397e-11	4	Grk3
Lsamp	1.10769e-14	0.320489	0.837	0.756	2.21538e-11	4	Lsamp
Ntm.1	2.24841e-14	0.332353	0.64	0.512	4.49681e-11	4	Ntm
Clu	2.46232e-14	-0.345502	0.451	0.662	4.92464e-11	4	Clu
Celf4	4.73104e-14	-0.270404	0.835	0.939	9.46207e-11	4	Celf4
Alcam.2	5.78633e-14	-0.338321	0.273	0.526	1.15727e-10	4	Alcam
Ntrk2	9.45467e-14	-0.29078	0.653	0.813	1.89093e-10	4	Ntrk2
Gm47283.2	1.35236e-13	0.327982	0.973	0.962	2.70472e-10	4	Gm47283
Celf2.1	4.324e-13	-0.329479	0.345	0.565	8.648e-10	4	Celf2
Pde4b	7.9875e-13	0.308611	0.456	0.367	1.5975e-09	4	Pde4b
Phldb1	1.02836e-12	0.266011	0.416	0.296	2.05671e-09	4	Phldb1
Psap.1	1.14512e-12	-0.270967	0.852	0.943	2.29025e-09	4	Psap
Grm5.2	1.60507e-12	-0.263693	0.256	0.492	3.21015e-09	4	Grm5
Rps12	1.74419e-12	0.302898	0.81	0.756	3.48838e-09	4	Rps12
Zbtb20	1.77825e-12	-0.296256	0.783	0.912	3.5565e-09	4	Zbtb20
Ptprz1.2	3.39932e-12	-0.255336	0.463	0.672	6.79865e-09	4	Ptprz1
Cacna2d1	4.56244e-11	0.380783	0.579	0.505	9.12489e-08	4	Cacna2d1
Chchd10	4.63613e-11	-0.265109	0.286	0.519	9.27227e-08	4	Chchd10
Chpt1	5.98956e-10	0.257341	0.468	0.389	1.19791e-06	4	Chpt1
Ppp1r9a	1.25446e-08	-0.257768	0.539	0.721	2.50892e-05	4	Ppp1r9a
Pomc.3	6.13175e-08	-1.23421	0.271	0.45	0.000122635	4	Pomc
Pam	7.24682e-07	-0.264387	0.512	0.666	0.00144936	4	Pam
Nrgn.3	2.34381e-05	-0.260099	0.217	0.401	0.0468762	4	Nrgn
Nr4a2	0.00365762	0.474565	0.384	0.392	1	4	Nr4a2
Ghrh.4	0.00457688	-0.739608	0.296	0.313	1	4	Ghrh
Ghrh.5	3.90217e-181	2.9258	0.962	0.255	7.80433e-178	5	Ghrh
Gal.3	3.54942e-146	1.92396	0.933	0.266	7.09884e-143	5	Gal
Slc18a3	8.2424e-81	0.346256	0.711	0.307	1.64848e-77	5	Slc18a3
Tiparp	1.02168e-66	0.265088	0.714	0.275	2.04337e-63	5	Tiparp
Dlx1	2.24639e-58	0.51488	0.705	0.247	4.49279e-55	5	Dlx1
Cpne7.1	1.76305e-57	0.609248	0.854	0.471	3.5261e-54	5	Cpne7
Tmod1	7.27251e-55	0.317485	0.711	0.369	1.4545e-51	5	Tmod1
Dlx6os1	5.73201e-51	0.315252	0.683	0.341	1.1464e-47	5	Dlx6os1
Grik1	1.77026e-50	0.479911	0.733	0.296	3.54052e-47	5	Grik1
Foxp2	2.19492e-48	0.426302	0.686	0.378	4.38985e-45	5	Foxp2
Slc10a4	1.05626e-46	0.379465	0.638	0.287	2.11251e-43	5	Slc10a4
Fstl5	6.22545e-46	0.561851	0.733	0.298	1.24509e-42	5	Fstl5
Mast4	1.58154e-43	0.468956	0.844	0.48	3.16307e-40	5	Mast4
Pld5	5.2149e-43	0.355898	0.679	0.286	1.04298e-39	5	Pld5
Unc5b	5.38708e-34	0.274046	0.616	0.27	1.07742e-30	5	Unc5b
Thsd7a	6.32495e-33	0.379685	0.679	0.322	1.26499e-29	5	Thsd7a
Esr1.2	2.10783e-31	0.297076	0.698	0.36	4.21565e-28	5	Esr1
Asb4.3	7.1826e-31	0.404539	0.908	0.598	1.43652e-27	5	Asb4
Pcdh19.3	7.66732e-30	-0.437407	0.248	0.488	1.53346e-26	5	Pcdh19
Pbx3	1.1781e-23	0.263603	0.59	0.325	2.35619e-20	5	Pbx3
Elmo1	1.67424e-21	0.285654	0.708	0.407	3.34848e-18	5	Elmo1
Rpl8	2.89234e-21	0.347147	0.975	0.91	5.78468e-18	5	Rpl8
App.2	4.44473e-21	-0.423854	0.87	0.941	8.88946e-18	5	App
Th	1.20448e-20	0.394313	0.54	0.218	2.40895e-17	5	Th
Rpl27a.1	1.65785e-20	0.361903	0.956	0.882	3.31571e-17	5	Rpl27a
Cadps2.1	9.49885e-20	0.375612	0.648	0.386	1.89977e-16	5	Cadps2
Meg3.2	5.76866e-18	-0.412121	1	0.999	1.15373e-14	5	Meg3
Parm1.2	1.29251e-17	0.348918	0.771	0.531	2.58501e-14	5	Parm1
Calb1.3	1.67214e-17	-0.41652	0.349	0.513	3.34427e-14	5	Calb1
Pcdh11x.2	1.87427e-17	-0.350115	0.292	0.421	3.74854e-14	5	Pcdh11x
Vgf.3	8.95645e-17	0.3821	0.695	0.412	1.79129e-13	5	Vgf
Rpl37.1	4.55212e-16	0.342447	0.975	0.932	9.10425e-13	5	Rpl37
Plagl1.3	8.02809e-16	-0.409341	0.435	0.554	1.60562e-12	5	Plagl1
Nrxn3.2	1.26667e-15	0.384286	0.835	0.711	2.53333e-12	5	Nrxn3
Prlr.4	1.63086e-15	-0.593971	0.467	0.573	3.26172e-12	5	Prlr
Tbx3.1	7.6159e-15	-0.3911	0.416	0.509	1.52318e-11	5	Tbx3
Prox1	9.94348e-15	0.351532	0.587	0.351	1.9887e-11	5	Prox1
Zbtb20.1	1.26459e-14	0.349115	0.968	0.893	2.52918e-11	5	Zbtb20
Ntrk2.1	2.10088e-14	0.309792	0.94	0.784	4.20176e-11	5	Ntrk2
Rps21.1	3.28139e-14	0.308981	0.965	0.918	6.56277e-11	5	Rps21
Ntm.2	3.53662e-14	-0.359514	0.4	0.536	7.07325e-11	5	Ntm
Rpl13	4.35387e-14	0.280596	0.978	0.966	8.70774e-11	5	Rpl13
Edil3.2	4.43787e-14	-0.346787	0.413	0.533	8.87574e-11	5	Edil3
Ecel1	5.27157e-14	0.289837	0.819	0.589	1.05431e-10	5	Ecel1
Rps8.1	7.89814e-14	0.275136	0.994	0.947	1.57963e-10	5	Rps8
Zfhx3.3	1.08621e-13	-0.348562	0.397	0.541	2.17242e-10	5	Zfhx3
Slc17a6.1	1.84872e-13	-0.275251	0.257	0.363	3.69744e-10	5	Slc17a6
Rps14	2.31637e-13	0.296176	0.914	0.831	4.63274e-10	5	Rps14
Pgrmc1.1	5.62068e-13	-0.341735	0.908	0.927	1.12414e-09	5	Pgrmc1
Rps10	5.63163e-13	0.313442	0.905	0.828	1.12633e-09	5	Rps10
Hs6st2	6.89049e-13	-0.370394	0.349	0.486	1.3781e-09	5	Hs6st2
Pcp4.1	8.11649e-13	0.312411	0.806	0.625	1.6233e-09	5	Pcp4
Chl1	5.09759e-12	-0.267827	0.362	0.473	1.01952e-08	5	Chl1
Cited1.2	7.09012e-12	-0.327939	0.537	0.611	1.41802e-08	5	Cited1
Rpl23.1	1.16383e-11	0.27054	0.962	0.922	2.32765e-08	5	Rpl23
Itm2c.3	3.01697e-11	-0.287108	0.876	0.917	6.03395e-08	5	Itm2c
Syt11	5.43662e-11	-0.253949	0.924	0.944	1.08732e-07	5	Syt11
Gad2.2	6.19904e-11	0.307358	0.829	0.66	1.23981e-07	5	Gad2
Irs4.3	8.60148e-11	-0.40282	0.565	0.625	1.7203e-07	5	Irs4
Bex2.1	5.38669e-10	0.285296	0.987	0.94	1.07734e-06	5	Bex2
Calb2.1	8.90807e-10	-0.306735	0.324	0.417	1.78161e-06	5	Calb2
Nrgn.4	1.03031e-09	-0.300559	0.308	0.389	2.06061e-06	5	Nrgn
C230004F18Rik.1	1.79055e-09	-0.302646	0.6	0.701	3.5811e-06	5	C230004F18Rik
Rpl32	5.63662e-09	0.264464	0.908	0.792	1.12732e-05	5	Rpl32
Otp.5	6.21876e-09	-0.478631	0.444	0.497	1.24375e-05	5	Otp
Lsamp.1	2.16068e-08	-0.279127	0.749	0.766	4.32137e-05	5	Lsamp
Rpl10.1	1.36252e-07	0.262564	0.806	0.713	0.000272504	5	Rpl10
Unc5d.1	1.73407e-07	-0.287933	0.644	0.661	0.000346814	5	Unc5d
Kcnk9.2	4.65778e-07	0.298648	0.635	0.46	0.000931555	5	Kcnk9
Sst.2	1.88171e-06	-1.5271	0.483	0.494	0.00376343	5	Sst
Kcnk2.2	4.64738e-06	-0.329027	0.533	0.54	0.00929476	5	Kcnk2
Ncam2	8.39258e-06	-0.250469	0.419	0.45	0.0167852	5	Ncam2
Crabp1.2	0.000104113	-0.253889	0.495	0.33	0.208227	5	Crabp1
Npy.4	0.000258948	-1.18688	0.514	0.481	0.517896	5	Npy
Acvr1c.1	0.00134579	-0.304418	0.568	0.547	1	5	Acvr1c
Vgll3.2	0.00377689	-0.264344	0.387	0.38	1	5	Vgll3
Crabp1.3	7.01715e-123	1.3526	0.869	0.301	1.40343e-119	6	Crabp1
Vgll3.3	1.41178e-93	0.974865	0.825	0.345	2.82356e-90	6	Vgll3
Grm5.3	1.68554e-60	0.84952	0.811	0.44	3.37108e-57	6	Grm5
Pnoc.1	1.40361e-43	0.441865	0.622	0.307	2.80722e-40	6	Pnoc
Scg2.3	3.48701e-41	-0.736193	0.629	0.877	6.97401e-38	6	Scg2
Agrp.4	2.66969e-38	-1.11494	0.275	0.62	5.33938e-35	6	Agrp
Epha5.2	1.49741e-33	0.608789	0.746	0.477	2.99482e-30	6	Epha5
Rgs2.1	1.45615e-32	-0.514798	0.265	0.617	2.9123e-29	6	Rgs2
Otp.6	6.35137e-31	-0.505249	0.179	0.518	1.27027e-27	6	Otp
Rab3c.2	3.04877e-30	0.513323	0.952	0.839	6.09753e-27	6	Rab3c
Nxph1	7.52364e-29	0.4431	0.56	0.334	1.50473e-25	6	Nxph1
Cadps2.2	3.46694e-28	-0.291348	0.089	0.432	6.93387e-25	6	Cadps2
S100a10	2.25229e-27	0.274632	0.546	0.332	4.50458e-24	6	S100a10
Tenm1.2	4.25244e-23	0.513846	0.694	0.47	8.50489e-20	6	Tenm1
Rpl21	1.34225e-22	-0.440021	0.866	0.946	2.6845e-19	6	Rpl21
Rreb1	1.51154e-22	0.432215	0.591	0.38	3.02309e-19	6	Rreb1
Parm1.3	4.0452e-22	-0.379653	0.278	0.572	8.0904e-19	6	Parm1
Gabrg1.1	4.59441e-21	0.387624	0.749	0.574	9.18883e-18	6	Gabrg1
Gad1.1	3.97279e-20	0.404253	0.753	0.537	7.94557e-17	6	Gad1
Hap1	1.73045e-19	0.333859	0.986	0.966	3.46091e-16	6	Hap1
Cartpt.3	1.8057e-18	-0.970626	0.309	0.569	3.61141e-15	6	Cartpt
Pcdh17.1	4.54019e-18	-0.392244	0.478	0.721	9.08037e-15	6	Pcdh17
Pgrmc1.2	2.66958e-17	0.327112	0.966	0.923	5.33915e-14	6	Pgrmc1
Gpx3.1	3.71113e-17	-0.419253	0.546	0.743	7.42226e-14	6	Gpx3
Ghrh.6	2.02126e-16	-0.80527	0.082	0.33	4.04251e-13	6	Ghrh
Col18a1	2.08149e-16	0.37769	0.591	0.455	4.16297e-13	6	Col18a1
App.3	3.77676e-16	-0.36753	0.887	0.939	7.55352e-13	6	App
Alcam.3	3.95091e-16	0.282327	0.691	0.484	7.90181e-13	6	Alcam
Necab1	5.14811e-16	0.479436	0.495	0.32	1.02962e-12	6	Necab1
Ecel1.1	6.56427e-16	-0.464213	0.419	0.622	1.31285e-12	6	Ecel1
Syt4	1.69427e-15	-0.405293	0.643	0.799	3.38855e-12	6	Syt4
Tcf4	2.04379e-15	-0.32947	0.309	0.569	4.08759e-12	6	Tcf4
Ap1s2	7.17219e-15	-0.374079	0.23	0.518	1.43444e-11	6	Ap1s2
Atp2b1.2	1.31918e-14	-0.3689	0.519	0.735	2.63836e-11	6	Atp2b1
Npy.5	1.82568e-14	-1.16792	0.254	0.502	3.65136e-11	6	Npy
Mt3	1.97868e-14	0.394316	0.787	0.69	3.95736e-11	6	Mt3
Nrgn.5	3.72537e-14	0.256901	0.553	0.369	7.45074e-11	6	Nrgn
Rpl18a	4.17761e-14	-0.382572	0.725	0.831	8.35523e-11	6	Rpl18a
Eef1a1.1	1.2447e-13	-0.289415	0.979	0.993	2.48939e-10	6	Eef1a1
Dgkk	1.40621e-13	0.448961	0.533	0.361	2.81243e-10	6	Dgkk
C230004F18Rik.2	1.68033e-13	0.265674	0.828	0.682	3.36066e-10	6	C230004F18Rik
Rps19	3.12084e-13	-0.356128	0.804	0.89	6.24168e-10	6	Rps19
Tmsb4x.1	3.3403e-13	-0.342385	0.808	0.908	6.6806e-10	6	Tmsb4x
Rpl19	4.30003e-13	-0.308102	0.897	0.954	8.60005e-10	6	Rpl19
Tead1	4.31756e-13	0.376563	0.557	0.398	8.63512e-10	6	Tead1
Rps20.1	7.27413e-13	-0.352034	0.746	0.839	1.45483e-09	6	Rps20
Tac2.4	8.51276e-13	-0.734023	0.062	0.301	1.70255e-09	6	Tac2
Rpl35a	2.71195e-12	-0.307295	0.887	0.952	5.4239e-09	6	Rpl35a
Pcdh11x.3	4.41077e-12	-0.268502	0.199	0.428	8.82154e-09	6	Pcdh11x
Lsamp.2	1.43694e-11	-0.28373	0.574	0.779	2.87388e-08	6	Lsamp
Gad2.3	1.72602e-11	-0.380845	0.529	0.685	3.45204e-08	6	Gad2
Rpl41	2.12309e-11	-0.264011	0.945	0.966	4.24618e-08	6	Rpl41
Pomc.4	4.47975e-11	-1.32098	0.244	0.447	8.95949e-08	6	Pomc
Rpl36	6.96525e-11	-0.3211	0.729	0.834	1.39305e-07	6	Rpl36
Rpl37.2	9.59773e-11	-0.301111	0.904	0.938	1.91955e-07	6	Rpl37
Resp18.2	9.78634e-11	-0.341354	0.677	0.815	1.95727e-07	6	Resp18
Tbx3.2	1.12642e-10	0.299803	0.591	0.495	2.25285e-07	6	Tbx3
Rpl11	1.33571e-10	-0.2844	0.856	0.913	2.67143e-07	6	Rpl11
Gal.4	1.0743e-09	-0.546698	0.134	0.334	2.14859e-06	6	Gal
Rpl9	1.23663e-09	-0.275977	0.897	0.958	2.47325e-06	6	Rpl9
Impact	1.2493e-09	-0.273929	0.804	0.88	2.49859e-06	6	Impact
Hs6st2.1	2.4877e-09	0.366476	0.584	0.467	4.9754e-06	6	Hs6st2
Rpl23.2	4.57727e-09	-0.263799	0.876	0.929	9.15454e-06	6	Rpl23
Calb1.4	5.90192e-09	-0.336278	0.323	0.514	1.18038e-05	6	Calb1
Edil3.3	7.90426e-09	0.251002	0.622	0.515	1.58085e-05	6	Edil3
Ptprd	8.66079e-09	0.338981	0.595	0.491	1.73216e-05	6	Ptprd
Rbms3.2	9.39906e-09	-0.288379	0.409	0.565	1.87981e-05	6	Rbms3
Rps27a.1	1.0324e-08	-0.254095	0.883	0.935	2.0648e-05	6	Rps27a
Timp3	1.04167e-08	0.294216	0.423	0.292	2.08335e-05	6	Timp3
Rps23	1.23674e-08	-0.271581	0.715	0.821	2.47348e-05	6	Rps23
Serpina3n.4	1.47062e-08	-0.475263	0.467	0.591	2.94125e-05	6	Serpina3n
Rpl38	1.52031e-08	-0.266187	0.887	0.932	3.04062e-05	6	Rpl38
Rpl27a.2	1.70217e-08	-0.275246	0.804	0.895	3.40433e-05	6	Rpl27a
Stmn1.1	1.72542e-08	-0.282108	0.653	0.774	3.45083e-05	6	Stmn1
Atp2b4.1	2.2597e-08	0.321895	0.57	0.431	4.5194e-05	6	Atp2b4
Pde1a.1	2.30867e-08	0.311087	0.443	0.329	4.61735e-05	6	Pde1a
Celf2.2	2.76031e-08	0.253912	0.656	0.533	5.52063e-05	6	Celf2
Asb4.4	3.01139e-08	-0.406268	0.495	0.633	6.02278e-05	6	Asb4
AC149090.1	3.83129e-08	0.261199	0.893	0.85	7.66258e-05	6	AC149090.1
Tpt1.1	6.11491e-08	-0.281187	0.605	0.732	0.000122298	6	Tpt1
Rps12.1	9.8228e-08	-0.306118	0.684	0.768	0.000196456	6	Rps12
Rpl30	1.19012e-07	-0.263782	0.79	0.869	0.000238023	6	Rpl30
2900097C17Rik.1	2.43892e-07	0.257372	0.852	0.829	0.000487784	6	2900097C17Rik
Miat	9.53987e-06	0.26335	0.698	0.672	0.0190797	6	Miat
Sst.3	2.24004e-05	-1.31361	0.381	0.502	0.0448009	6	Sst
Prlr.5	6.21194e-05	-0.39227	0.471	0.572	0.124239	6	Prlr
Plagl1.4	8.54164e-05	-0.274524	0.436	0.553	0.170833	6	Plagl1
Cacna2d1.1	0.00010298	-0.319299	0.416	0.52	0.20596	6	Cacna2d1
Acvr1c.2	0.000129604	-0.250608	0.478	0.554	0.259208	6	Acvr1c
Gpc3	0.00944116	0.271417	0.337	0.289	1	6	Gpc3
Cartpt.4	1.90682e-112	2.04682	0.981	0.519	3.81365e-109	7	Cartpt
Trh	3.75911e-84	1.00486	0.722	0.153	7.51822e-81	7	Trh
Ccnd1	1.81248e-76	0.840958	0.745	0.248	3.62497e-73	7	Ccnd1
Mcam	1.0328e-71	0.430216	0.669	0.261	2.06561e-68	7	Mcam
Serpina3n.5	1.07639e-71	1.12799	0.92	0.558	2.15279e-68	7	Serpina3n
Itpr2	3.67286e-52	0.316406	0.639	0.258	7.34572e-49	7	Itpr2
Pam.1	5.49997e-52	0.937429	0.92	0.63	1.09999e-48	7	Pam
Rgs4	2.24831e-51	0.7262	0.806	0.449	4.49662e-48	7	Rgs4
H2-K1	2.00854e-50	0.785775	0.692	0.329	4.01709e-47	7	H2-K1
Gnas.3	1.79143e-47	0.600363	1	0.996	3.58286e-44	7	Gnas
Gpr179	4.96496e-44	0.380443	0.681	0.292	9.92991e-41	7	Gpr179
Asb4.5	6.22373e-43	0.807235	0.875	0.605	1.24475e-39	7	Asb4
Tmem176b	6.27792e-43	0.343465	0.749	0.308	1.25558e-39	7	Tmem176b
Utrn	1.16309e-38	0.27825	0.665	0.269	2.32617e-35	7	Utrn
Meg3.3	4.66978e-38	0.517899	1	0.999	9.33957e-35	7	Meg3
Rprm	4.76863e-37	0.281875	0.62	0.296	9.53725e-34	7	Rprm
B2m	3.51057e-34	0.442272	0.635	0.298	7.02113e-31	7	B2m
Slc10a4.1	6.9234e-34	0.306587	0.597	0.295	1.38468e-30	7	Slc10a4
Pgrmc1.3	1.3809e-33	-0.622375	0.817	0.934	2.7618e-30	7	Pgrmc1
Gria3.2	2.03795e-32	-0.483691	0.319	0.6	4.07589e-29	7	Gria3
Rorb	1.48978e-31	0.402804	0.627	0.238	2.97956e-28	7	Rorb
Nkx2-4	5.62749e-30	0.386667	0.567	0.27	1.1255e-26	7	Nkx2-4
Cpne7.2	3.57983e-29	0.487647	0.776	0.482	7.15965e-26	7	Cpne7
Pcp4.2	1.93249e-28	0.65252	0.844	0.625	3.86499e-25	7	Pcp4
St18	1.98847e-28	0.39828	0.578	0.273	3.97694e-25	7	St18
Pcsk1n.4	2.27527e-28	-0.54061	0.992	0.992	4.55054e-25	7	Pcsk1n
Ly6h	3.24916e-27	-0.455013	0.958	0.988	6.49831e-24	7	Ly6h
Scn9a	2.2509e-26	0.502162	0.859	0.61	4.5018e-23	7	Scn9a
Clu.1	2.44017e-24	0.558799	0.848	0.626	4.88034e-21	7	Clu
Il1rap	9.82956e-24	0.332008	0.643	0.375	1.96591e-20	7	Il1rap
Otp.7	1.74205e-23	-0.571461	0.289	0.508	3.48411e-20	7	Otp
Malat1	1.10859e-22	0.314462	1	1	2.21718e-19	7	Malat1
Ghrh.7	1.88156e-22	-0.576831	0.574	0.293	3.76312e-19	7	Ghrh
Pcdh19.4	1.13009e-21	-0.473051	0.243	0.485	2.26018e-18	7	Pcdh19
Sorbs2	2.77072e-21	0.395686	0.772	0.512	5.54144e-18	7	Sorbs2
Cd63	5.85064e-20	0.254031	0.734	0.423	1.17013e-16	7	Cd63
Serpini1.1	3.21082e-19	-0.32036	0.304	0.472	6.42164e-16	7	Serpini1
Nrgn.6	6.29729e-19	-0.337238	0.19	0.396	1.25946e-15	7	Nrgn
H2-D1	9.46449e-19	0.642105	0.624	0.393	1.8929e-15	7	H2-D1
C230004F18Rik.3	4.67814e-18	-0.568877	0.563	0.702	9.35628e-15	7	C230004F18Rik
Epha5.3	2.23868e-17	0.381325	0.757	0.478	4.47735e-14	7	Epha5
Atp1a1.1	2.56951e-17	0.426176	0.932	0.776	5.13901e-14	7	Atp1a1
Prlr.6	1.89582e-16	-0.705295	0.456	0.573	3.79164e-13	7	Prlr
Prkacb.1	2.18716e-16	-0.376631	0.806	0.909	4.37431e-13	7	Prkacb
Kcnq3	4.05122e-16	-0.250624	0.289	0.441	8.10245e-13	7	Kcnq3
Pclo.1	4.46818e-16	-0.412517	0.654	0.771	8.93636e-13	7	Pclo
Rab3c.3	4.48478e-16	-0.416104	0.768	0.853	8.96956e-13	7	Rab3c
Map2	5.25316e-16	-0.368776	0.856	0.934	1.05063e-12	7	Map2
Pcsk2.1	1.74932e-15	-0.293726	0.171	0.376	3.49865e-12	7	Pcsk2
Cadm1.1	2.3366e-15	-0.362694	0.548	0.706	4.6732e-12	7	Cadm1
Chga	8.99644e-15	0.457743	0.677	0.443	1.79929e-11	7	Chga
Ecel1.2	6.80751e-13	-0.368701	0.502	0.615	1.3615e-09	7	Ecel1
Nnat.2	2.04626e-12	-0.382036	0.544	0.705	4.09253e-09	7	Nnat
Slc17a6.2	5.4273e-12	-0.252076	0.243	0.363	1.08546e-08	7	Slc17a6
Tmsb4x.2	1.41396e-11	-0.348106	0.848	0.905	2.82792e-08	7	Tmsb4x
Pcdh7.1	1.7478e-11	-0.438615	0.768	0.783	3.49559e-08	7	Pcdh7
Unc5d.2	2.97208e-11	-0.433637	0.589	0.665	5.94417e-08	7	Unc5d
Maged1	3.16782e-11	0.276665	0.97	0.962	6.33565e-08	7	Maged1
App.4	3.20217e-11	-0.34054	0.916	0.936	6.40435e-08	7	App
Rpl30.1	5.30228e-11	0.279082	0.916	0.859	1.06046e-07	7	Rpl30
Scd2	6.81987e-10	-0.280128	0.544	0.69	1.36397e-06	7	Scd2
Ppp1r9a.1	8.8528e-10	-0.319316	0.593	0.71	1.77056e-06	7	Ppp1r9a
Ppp3ca.1	2.06471e-09	-0.296442	0.688	0.787	4.12942e-06	7	Ppp3ca
Resp18.3	3.13821e-09	0.304916	0.871	0.8	6.27642e-06	7	Resp18
Ptprk.1	3.62921e-09	-0.261834	0.422	0.491	7.25841e-06	7	Ptprk
Pcdh11x.4	5.46161e-09	-0.386845	0.319	0.417	1.09232e-05	7	Pcdh11x
Atp2b1.3	7.77272e-09	0.277737	0.859	0.709	1.55454e-05	7	Atp2b1
Kcnk2.3	8.2039e-09	-0.443119	0.49	0.543	1.64078e-05	7	Kcnk2
Fut9	9.38043e-09	0.272434	0.624	0.428	1.87609e-05	7	Fut9
Tpt1.2	1.91106e-08	0.274801	0.833	0.715	3.82212e-05	7	Tpt1
Tmem35a.3	2.8233e-08	-0.443269	0.422	0.489	5.64661e-05	7	Tmem35a
Lsamp.3	3.01488e-08	-0.300601	0.715	0.768	6.02976e-05	7	Lsamp
Itm2c.4	3.71763e-08	-0.269749	0.863	0.918	7.43525e-05	7	Itm2c
Marcks	3.75678e-08	-0.282876	0.555	0.656	7.51355e-05	7	Marcks
Syt4.1	4.40027e-08	0.261404	0.867	0.782	8.80054e-05	7	Syt4
Zfhx3.4	8.89011e-08	-0.35311	0.449	0.536	0.000177802	7	Zfhx3
Rps12.2	1.24996e-07	0.292585	0.821	0.758	0.000249992	7	Rps12
Rpl10.2	1.38018e-07	0.265898	0.821	0.714	0.000276036	7	Rpl10
Edil3.4	3.12106e-07	-0.269328	0.483	0.526	0.000624211	7	Edil3
Syn2.1	3.57181e-07	-0.319908	0.586	0.628	0.000714362	7	Syn2
2900097C17Rik.2	6.71348e-07	-0.260568	0.749	0.837	0.0013427	7	2900097C17Rik
Apoe.1	1.64258e-06	-0.284933	0.529	0.629	0.00328517	7	Apoe
Cox6a2	2.55906e-06	0.476322	0.487	0.341	0.00511812	7	Cox6a2
Ntm.3	3.03256e-06	-0.354855	0.49	0.527	0.00606512	7	Ntm
Gpr101.4	6.66647e-06	-0.291284	0.426	0.477	0.0133329	7	Gpr101
Ndn.1	1.15497e-05	0.300029	0.878	0.899	0.0230994	7	Ndn
Sv2c.2	1.32354e-05	-0.321807	0.532	0.526	0.0264707	7	Sv2c
Crabp1.4	2.5056e-05	-0.25504	0.517	0.331	0.050112	7	Crabp1
Oxt	3.78646e-05	0.629617	0.266	0.117	0.0757292	7	Oxt
Tcf4.1	6.3321e-05	-0.274475	0.529	0.552	0.126642	7	Tcf4
Pomc.5	0.000188791	-1.34588	0.593	0.42	0.377583	7	Pomc
Cplx2.1	0.000191537	-0.290949	0.513	0.515	0.383073	7	Cplx2
Calb1.5	0.000315486	-0.435832	0.483	0.501	0.630971	7	Calb1
Auts2.1	0.000738477	-0.277871	0.517	0.516	1	7	Auts2
Kcnk9.3	0.00087922	-0.371364	0.479	0.474	1	7	Kcnk9
Arhgap6.2	0.000991789	-0.300329	0.57	0.565	1	7	Arhgap6
Aldoc	0.0011839	0.436534	0.582	0.465	1	7	Aldoc
Agrp.5	0.00410851	-1.23562	0.593	0.595	1	7	Agrp
Hs6st2.2	0.0053185	-0.314327	0.46	0.476	1	7	Hs6st2
Ptprz1.3	0.00972914	-0.260183	0.719	0.646	1	7	Ptprz1
Pomc.6	1.2572e-125	4.51527	1	0.403	2.5144e-122	8	Pomc
Cartpt.5	5.04973e-73	2.38742	0.942	0.53	1.00995e-69	8	Cartpt
Vgf.4	1.26484e-55	1.48198	0.869	0.413	2.52969e-52	8	Vgf
Cd24a	2.23728e-53	0.450344	0.665	0.267	4.47457e-50	8	Cd24a
Fn1	5.31674e-51	0.427816	0.675	0.325	1.06335e-47	8	Fn1
Plagl1.5	5.83149e-51	0.925598	0.906	0.526	1.1663e-47	8	Plagl1
Cd44	8.99713e-50	0.419714	0.639	0.25	1.79943e-46	8	Cd44
Serpina3n.6	2.63308e-48	0.960427	0.901	0.566	5.26616e-45	8	Serpina3n
Npy1r.3	7.29653e-48	0.842441	0.801	0.375	1.45931e-44	8	Npy1r
Asb4.6	4.93509e-44	1.33427	0.901	0.609	9.87018e-41	8	Asb4
Resp18.4	1.82941e-40	0.859931	0.979	0.796	3.65882e-37	8	Resp18
Slc18a2	5.89065e-40	0.572996	0.749	0.386	1.17813e-36	8	Slc18a2
Pdyn.2	4.78721e-39	0.571509	0.764	0.364	9.57443e-36	8	Pdyn
Calb1.6	9.41468e-39	0.792189	0.859	0.481	1.88294e-35	8	Calb1
Irs4.4	7.68507e-38	0.784377	0.895	0.606	1.53701e-34	8	Irs4
Syt1.2	5.3286e-37	-0.880424	0.361	0.756	1.06572e-33	8	Syt1
Rnf128.1	3.25748e-28	0.620363	0.791	0.496	6.51496e-25	8	Rnf128
Pcdh7.2	4.69067e-28	-0.658211	0.503	0.796	9.38134e-25	8	Pcdh7
S100a10.1	2.1533e-26	0.336994	0.649	0.332	4.30659e-23	8	S100a10
App.5	1.86965e-25	0.560714	0.995	0.932	3.73929e-22	8	App
Cited1.3	3.53218e-25	0.527678	0.874	0.591	7.06437e-22	8	Cited1
Ppp1r9a.2	7.21549e-25	0.6961	0.906	0.692	1.4431e-21	8	Ppp1r9a
Pcdh11x.5	7.55623e-25	0.317559	0.759	0.393	1.51125e-21	8	Pcdh11x
Ghrh.8	1.09788e-24	-0.462337	0.099	0.322	2.19576e-21	8	Ghrh
Uchl1	2.97049e-24	0.502246	0.984	0.925	5.94097e-21	8	Uchl1
Tubb3	1.64802e-23	0.620386	0.848	0.613	3.29603e-20	8	Tubb3
Nptx2	2.14244e-23	0.403869	0.675	0.444	4.28488e-20	8	Nptx2
Slc32a1.2	2.24639e-23	-0.454031	0.188	0.511	4.49277e-20	8	Slc32a1
Six3.3	2.59441e-23	0.522045	0.723	0.393	5.18881e-20	8	Six3
Ptprn	1.30487e-22	0.514188	0.948	0.839	2.60974e-19	8	Ptprn
Hsp90aa1	1.42053e-22	0.449731	1	0.982	2.84105e-19	8	Hsp90aa1
Ifi27	3.01665e-21	0.3272	0.576	0.328	6.03331e-18	8	Ifi27
Otp.8	1.28342e-20	-0.516796	0.23	0.506	2.56684e-17	8	Otp
Tenm1.3	1.49412e-20	0.413344	0.78	0.472	2.98825e-17	8	Tenm1
Cacna2d1.2	1.79381e-20	0.476451	0.785	0.498	3.58761e-17	8	Cacna2d1
Nrxn3.3	7.47248e-20	-0.640891	0.518	0.732	1.4945e-16	8	Nrxn3
Gpx3.2	2.24538e-19	0.504339	0.895	0.72	4.49077e-16	8	Gpx3
Ptprt	3.38217e-19	0.306787	0.707	0.42	6.76435e-16	8	Ptprt
Syt4.2	1.66645e-18	0.513265	0.927	0.781	3.33289e-15	8	Syt4
AC149090.1.1	2.5575e-18	-0.482548	0.67	0.863	5.11501e-15	8	AC149090.1
Atp1a1.2	6.62712e-18	0.496834	0.901	0.78	1.32542e-14	8	Atp1a1
Npy.6	1.00251e-17	-1.23976	0.251	0.495	2.00503e-14	8	Npy
Chl1.1	1.20531e-17	0.581325	0.696	0.453	2.41061e-14	8	Chl1
Gnas.4	1.38452e-17	0.371375	0.995	0.996	2.76904e-14	8	Gnas
Rpl41.1	1.67866e-17	0.375406	0.995	0.963	3.35731e-14	8	Rpl41
Kcnk9.4	4.56315e-17	-0.374898	0.225	0.487	9.1263e-14	8	Kcnk9
Arhgap36.1	5.56604e-17	-0.394823	0.225	0.488	1.11321e-13	8	Arhgap36
Peg3	1.26712e-16	0.35593	1	0.98	2.53424e-13	8	Peg3
Hs6st2.3	2.36935e-16	0.38347	0.749	0.461	4.7387e-13	8	Hs6st2
Cplx2.2	3.7534e-16	-0.334262	0.293	0.527	7.5068e-13	8	Cplx2
Gfra1	1.61098e-15	0.265413	0.618	0.324	3.22195e-12	8	Gfra1
Tcf4.2	5.53336e-15	0.322703	0.796	0.538	1.10667e-11	8	Tcf4
Ar.1	6.58307e-15	0.254489	0.712	0.42	1.31661e-11	8	Ar
Peg10	6.68965e-15	0.27333	0.738	0.465	1.33793e-11	8	Peg10
Map1b	3.12594e-14	0.351606	0.963	0.958	6.25188e-11	8	Map1b
Tuba1a.1	9.42958e-14	0.455799	0.932	0.78	1.88592e-10	8	Tuba1a
Ctsz	1.2634e-13	0.260629	0.555	0.322	2.5268e-10	8	Ctsz
Tbx3.3	4.05909e-13	0.427774	0.702	0.492	8.11818e-10	8	Tbx3
Impact.1	5.29786e-13	0.35425	0.953	0.87	1.05957e-09	8	Impact
Cdh13	7.8087e-13	0.352094	0.565	0.263	1.56174e-09	8	Cdh13
Sst.4	2.63023e-12	-1.36775	0.319	0.502	5.26045e-09	8	Sst
Alcam.4	5.95548e-12	0.413078	0.712	0.489	1.1911e-08	8	Alcam
Dgkb	6.94261e-12	-0.295289	0.283	0.504	1.38852e-08	8	Dgkb
Dner.1	6.50842e-11	0.283065	0.785	0.553	1.30168e-07	8	Dner
Msi2.1	1.20714e-10	0.277452	0.812	0.618	2.41427e-07	8	Msi2
Hspa8	1.45389e-10	0.285455	0.99	0.977	2.90778e-07	8	Hspa8
Chgb.1	2.869e-10	0.319272	0.77	0.59	5.738e-07	8	Chgb
Car10.1	4.52988e-10	0.274283	0.586	0.364	9.05976e-07	8	Car10
C230004F18Rik.4	1.27375e-09	-0.385065	0.545	0.7	2.5475e-06	8	C230004F18Rik
Rab3c.4	1.5951e-09	-0.352437	0.733	0.853	3.1902e-06	8	Rab3c
Ndn.2	1.6186e-09	0.393378	0.916	0.896	3.23721e-06	8	Ndn
Epha5.4	5.73495e-09	-0.306215	0.351	0.504	1.14699e-05	8	Epha5
Tmem130	1.37609e-08	-0.32379	0.785	0.832	2.75218e-05	8	Tmem130
Ubb	2.09219e-08	0.273992	0.99	0.955	4.18438e-05	8	Ubb
Hap1.1	2.74577e-08	-0.271612	0.916	0.97	5.49154e-05	8	Hap1
Scn9a.1	3.75466e-08	0.289303	0.764	0.62	7.50932e-05	8	Scn9a
Atp1b1.1	4.4593e-08	0.266449	1	0.975	8.91859e-05	8	Atp1b1
Gria2.1	4.89898e-08	-0.293655	0.937	0.945	9.79796e-05	8	Gria2
Pnisr	5.27706e-08	-0.303507	0.66	0.77	0.000105541	8	Pnisr
Rmst	5.81476e-08	0.278328	0.623	0.406	0.000116295	8	Rmst
Rasgrf2.1	1.40697e-07	0.267654	0.686	0.495	0.000281393	8	Rasgrf2
Bsg	1.53705e-07	0.269639	0.853	0.729	0.000307411	8	Bsg
Gapdh	1.78224e-07	0.261397	0.932	0.919	0.000356449	8	Gapdh
Ppp3ca.2	3.20315e-07	-0.305769	0.712	0.784	0.000640631	8	Ppp3ca
Agrp.6	3.44263e-07	-1.07649	0.529	0.598	0.000688527	8	Agrp
Prkacb.2	5.7981e-06	-0.256977	0.869	0.903	0.0115962	8	Prkacb
2900097C17Rik.3	6.1069e-06	-0.255582	0.78	0.834	0.0122138	8	2900097C17Rik
Ntrk2.2	7.09123e-06	-0.267767	0.738	0.8	0.0141825	8	Ntrk2
Pcsk1n.5	1.7336e-05	-0.278434	0.99	0.992	0.034672	8	Pcsk1n
Apoe.2	3.92302e-05	-0.337961	0.534	0.627	0.0784605	8	Apoe
Prune2.3	4.17976e-05	0.267979	0.712	0.589	0.0835953	8	Prune2
Pcp4.3	0.000215461	-0.25188	0.565	0.643	0.430922	8	Pcp4
Tac2.5	0.000865943	-0.603667	0.183	0.288	1	8	Tac2
Elavl2	0.0011095	-0.258883	0.44	0.496	1	8	Elavl2
Snhg11.1	1.20438e-90	-2.347	1	0.999	2.40876e-87	9	Snhg11
Malat1.1	2.25635e-83	-1.64411	1	1	4.51269e-80	9	Malat1
Meg3.4	3.91831e-76	-1.94747	1	0.999	7.83663e-73	9	Meg3
mt-Co1.1	4.62215e-53	0.77042	1	1	9.24431e-50	9	mt-Co1
Gm42418.1	1.05561e-45	0.957556	1	1	2.11121e-42	9	Gm42418
Gm47283.3	1.19035e-41	-1.15766	0.959	0.963	2.3807e-38	9	Gm47283
Kcnq1ot1	1.14294e-38	-0.874034	0.932	0.964	2.28588e-35	9	Kcnq1ot1
Miat.1	1.33003e-36	-0.822829	0.182	0.693	2.66005e-33	9	Miat
Agrp.7	7.12781e-29	1.02658	0.872	0.584	1.42556e-25	9	Agrp
Npy.7	5.05069e-26	1.12286	0.804	0.471	1.01014e-22	9	Npy
Edil3.5	3.05252e-24	-0.328352	0.142	0.538	6.10504e-21	9	Edil3
mt-Nd3	3.45103e-23	0.65046	0.892	0.674	6.90206e-20	9	mt-Nd3
Ptprz1.4	3.78355e-22	-0.497494	0.25	0.666	7.5671e-19	9	Ptprz1
Scn9a.2	7.46992e-22	-0.45182	0.23	0.643	1.49398e-18	9	Scn9a
5031439G07Rik	8.45084e-22	-0.31888	0.142	0.508	1.69017e-18	9	5031439G07Rik
Prlr.7	2.83527e-21	-0.507119	0.176	0.58	5.67054e-18	9	Prlr
Pcdh7.3	6.29691e-21	-0.606716	0.426	0.796	1.25938e-17	9	Pcdh7
Gabrg1.2	7.70956e-20	-0.340806	0.23	0.601	1.54191e-16	9	Gabrg1
Ahi1.1	1.58368e-19	-0.470081	0.993	0.988	3.16735e-16	9	Ahi1
Tmsb4x.3	4.78122e-19	0.540386	0.993	0.897	9.56245e-16	9	Tmsb4x
Ptprd.1	1.99904e-18	-0.497883	0.135	0.512	3.99809e-15	9	Ptprd
Cst3.2	3.30823e-18	0.543503	0.993	0.896	6.61645e-15	9	Cst3
Tenm1.4	7.99512e-18	-0.423753	0.149	0.5	1.59902e-14	9	Tenm1
Gria2.2	9.53043e-18	-0.511284	0.919	0.946	1.90609e-14	9	Gria2
Abca2	1.00063e-17	-0.276076	0.182	0.521	2.00126e-14	9	Abca2
Peg3.1	2.95716e-17	-0.458871	0.993	0.981	5.91433e-14	9	Peg3
Ttc3	3.10592e-17	-0.408087	0.993	0.996	6.21184e-14	9	Ttc3
Eef1a1.2	7.51443e-17	0.437046	1	0.992	1.50289e-13	9	Eef1a1
Apoe.3	1.42117e-16	0.483951	0.939	0.61	2.84235e-13	9	Apoe
mt-Nd5	1.74182e-16	0.519484	0.993	0.856	3.48363e-13	9	mt-Nd5
Rpl37a.1	3.76091e-16	0.555853	0.986	0.911	7.52182e-13	9	Rpl37a
AC149090.1.2	5.37581e-16	-0.628763	0.75	0.858	1.07516e-12	9	AC149090.1
Dmd.1	6.12885e-16	-0.369801	0.284	0.604	1.22577e-12	9	Dmd
Cdc37l1	8.58411e-16	-0.326148	0.223	0.538	1.71682e-12	9	Cdc37l1
Ecel1.3	1.25796e-15	-0.389095	0.27	0.621	2.51591e-12	9	Ecel1
mt-Nd2	1.90649e-15	0.439642	1	0.992	3.81298e-12	9	mt-Nd2
Sv2c.3	1.91399e-15	-0.28018	0.264	0.536	3.82799e-12	9	Sv2c
Ntng1	2.29591e-15	-0.256079	0.061	0.347	4.59182e-12	9	Ntng1
Rps29	7.06265e-15	0.45598	0.986	0.903	1.41253e-11	9	Rps29
Msi2.2	1.11041e-14	-0.416048	0.331	0.639	2.22081e-11	9	Msi2
Ogt	2.59862e-14	-0.484458	0.358	0.627	5.19725e-11	9	Ogt
Atp2b1.4	2.63405e-14	-0.474063	0.399	0.731	5.26811e-11	9	Atp2b1
Tmem47.1	4.0623e-14	-0.25161	0.149	0.466	8.1246e-11	9	Tmem47
Arhgap6.3	7.91348e-14	-0.275201	0.27	0.577	1.5827e-10	9	Arhgap6
Rpl36.1	9.38793e-14	0.536413	0.946	0.822	1.87759e-10	9	Rpl36
4930447C04Rik	1.0966e-13	-0.363554	0.122	0.43	2.19319e-10	9	4930447C04Rik
Alcam.5	1.11774e-13	-0.41641	0.216	0.511	2.23547e-10	9	Alcam
Zdbf2.1	2.13183e-13	-0.39422	0.405	0.747	4.26367e-10	9	Zdbf2
Slc38a2	2.52154e-13	-0.410753	0.236	0.505	5.04308e-10	9	Slc38a2
Hap1.2	3.0915e-13	-0.384474	0.953	0.968	6.183e-10	9	Hap1
Rps27a.2	4.21773e-13	0.479985	1	0.929	8.43546e-10	9	Rps27a
C230004F18Rik.5	7.05939e-13	-0.537139	0.432	0.703	1.41188e-09	9	C230004F18Rik
Bin1	9.69646e-13	-0.347578	0.318	0.644	1.93929e-09	9	Bin1
C130073E24Rik.1	1.51384e-12	-0.344325	0.223	0.468	3.02768e-09	9	C130073E24Rik
Epha5.5	1.87324e-12	-0.479289	0.236	0.507	3.74647e-09	9	Epha5
Rpl38.1	2.28915e-12	0.428445	0.986	0.926	4.5783e-09	9	Rpl38
Nnat.3	4.34548e-12	0.470686	0.885	0.687	8.69097e-09	9	Nnat
Asb4.7	4.39807e-12	-0.452847	0.365	0.633	8.79613e-09	9	Asb4
Rpl21.1	7.0372e-12	0.435872	1	0.937	1.40744e-08	9	Rpl21
Srrm2.1	1.06973e-11	-0.405088	0.912	0.921	2.13947e-08	9	Srrm2
mt-Nd1.1	1.18154e-11	0.34007	1	0.98	2.36309e-08	9	mt-Nd1
Rps24	1.32553e-11	0.40486	1	0.961	2.65105e-08	9	Rps24
Pnisr.1	2.01743e-11	-0.428181	0.574	0.772	4.03486e-08	9	Pnisr
Fau.1	2.14052e-11	0.424081	0.986	0.944	4.28104e-08	9	Fau
Gria3.3	4.01177e-11	-0.504908	0.405	0.588	8.02354e-08	9	Gria3
Crabp1.5	4.56899e-11	-0.274918	0.128	0.352	9.13798e-08	9	Crabp1
Rpl27a.3	4.80924e-11	0.432968	0.993	0.884	9.61848e-08	9	Rpl27a
Rplp1	1.54202e-10	0.41619	1	0.95	3.08404e-07	9	Rplp1
Ptma	1.8226e-10	-0.353137	0.459	0.703	3.64521e-07	9	Ptma
Ddhd1	2.56366e-10	-0.26182	0.189	0.401	5.12731e-07	9	Ddhd1
Aatk	3.16197e-10	-0.319971	0.318	0.584	6.32395e-07	9	Aatk
Pcdh9.1	3.19118e-10	-0.29285	0.318	0.617	6.38235e-07	9	Pcdh9
Gpr101.5	3.7532e-10	-0.379957	0.236	0.483	7.5064e-07	9	Gpr101
Auts2.2	4.28067e-10	-0.324466	0.297	0.524	8.56133e-07	9	Auts2
Rpl9.1	5.146e-10	0.420186	1	0.952	1.0292e-06	9	Rpl9
Ppia	5.55034e-10	0.409674	0.98	0.926	1.11007e-06	9	Ppia
Rpl13.1	6.87137e-10	0.362337	1	0.966	1.37427e-06	9	Rpl13
Syne1	7.02111e-10	-0.435112	0.554	0.74	1.40422e-06	9	Syne1
Camk2d	7.29418e-10	-0.316208	0.324	0.591	1.45884e-06	9	Camk2d
Rps21.2	8.90688e-10	0.366049	0.98	0.919	1.78138e-06	9	Rps21
Rpl23.3	1.03054e-09	0.444844	0.993	0.922	2.06108e-06	9	Rpl23
Ghrh.9	1.24866e-09	-0.358636	0.135	0.319	2.49733e-06	9	Ghrh
Map7	1.25747e-09	-0.36327	0.331	0.541	2.51494e-06	9	Map7
Ptprn.1	1.68817e-09	-0.367627	0.736	0.849	3.37634e-06	9	Ptprn
Nfasc	1.9984e-09	-0.27855	0.331	0.579	3.99679e-06	9	Nfasc
Rpl3.1	3.35665e-09	0.405715	0.986	0.901	6.7133e-06	9	Rpl3
mt-Nd4l	3.66973e-09	0.395938	0.986	0.847	7.33947e-06	9	mt-Nd4l
Rpl19.1	5.37097e-09	0.406647	0.986	0.948	1.07419e-05	9	Rpl19
Cpne7.3	7.08379e-09	-0.425227	0.345	0.507	1.41676e-05	9	Cpne7
Isl1.1	1.01689e-08	-0.413371	0.453	0.615	2.03378e-05	9	Isl1
Rps14.1	1.05952e-08	0.384861	0.919	0.835	2.11905e-05	9	Rps14
Rpl26	1.76884e-08	0.410192	0.872	0.773	3.53768e-05	9	Rpl26
Rpl24	1.94571e-08	0.415239	0.959	0.846	3.89141e-05	9	Rpl24
Rpsa	2.4793e-08	0.379075	0.993	0.92	4.95861e-05	9	Rpsa
Macf1	2.77552e-08	-0.371904	0.689	0.801	5.55105e-05	9	Macf1
Rps8.2	4.12539e-08	0.380754	1	0.949	8.25078e-05	9	Rps8
Lrp1b.2	4.58179e-08	-0.422143	0.216	0.428	9.16357e-05	9	Lrp1b
Dst	9.34297e-08	-0.331262	0.777	0.863	0.000186859	9	Dst
Gnas.5	1.09086e-07	-0.273612	1	0.996	0.000218173	9	Gnas
Npy1r.4	1.17504e-07	-0.256901	0.203	0.404	0.000235007	9	Npy1r
Pcsk1n.6	1.29164e-07	0.287015	1	0.992	0.000258328	9	Pcsk1n
Ppp1r9a.3	1.86071e-07	-0.297034	0.459	0.712	0.000372142	9	Ppp1r9a
Sst.5	3.03348e-07	-0.715773	0.311	0.5	0.000606695	9	Sst
Frmd4a	3.05091e-07	-0.329719	0.378	0.535	0.000610182	9	Frmd4a
Pcdh19.5	3.39038e-07	-0.303463	0.264	0.476	0.000678075	9	Pcdh19
Sorbs2.1	3.3979e-07	-0.41769	0.385	0.535	0.000679579	9	Sorbs2
Mt3.1	3.63688e-07	0.422401	0.818	0.692	0.000727377	9	Mt3
Nrxn3.4	3.75028e-07	-0.39477	0.601	0.726	0.000750056	9	Nrxn3
Fth1	3.953e-07	0.345957	0.973	0.87	0.0007906	9	Fth1
Rps19.1	7.08032e-07	0.306726	0.98	0.88	0.00141606	9	Rps19
Rps23.1	1.11153e-06	0.322927	0.919	0.809	0.00222306	9	Rps23
Gal.5	1.12596e-06	-0.328723	0.169	0.325	0.00225192	9	Gal
Rps20.2	1.24513e-06	0.390505	0.926	0.828	0.00249027	9	Rps20
Vgf.5	1.60927e-06	-0.491294	0.264	0.442	0.00321854	9	Vgf
Rpl37.3	1.95231e-06	0.319596	1	0.933	0.00390461	9	Rpl37
Col25a1.1	2.23656e-06	-0.290781	0.257	0.411	0.00447312	9	Col25a1
Rps11.1	2.28666e-06	0.303474	0.912	0.82	0.00457332	9	Rps11
Slc1a2.2	2.72353e-06	0.273201	0.838	0.621	0.00544705	9	Slc1a2
Rps10.1	3.00916e-06	0.348381	0.885	0.832	0.00601831	9	Rps10
Gm45159.1	3.13947e-06	-0.38576	0.392	0.51	0.00627893	9	Gm45159
Pfdn5	5.71159e-06	0.347057	0.777	0.732	0.0114232	9	Pfdn5
Rps12.3	5.99227e-06	0.3529	0.824	0.76	0.0119845	9	Rps12
Rps28	8.49484e-06	0.361968	0.784	0.748	0.0169897	9	Rps28
Rpl41.2	8.56322e-06	0.285552	0.986	0.964	0.0171264	9	Rpl41
Opcml.1	1.20713e-05	-0.294399	0.331	0.487	0.0241426	9	Opcml
Gad2.4	1.38213e-05	-0.3109	0.541	0.679	0.0276427	9	Gad2
Pcdh17.2	1.46626e-05	-0.28042	0.554	0.709	0.0293252	9	Pcdh17
Rpl8.1	1.99999e-05	0.275647	0.986	0.912	0.0399999	9	Rpl8
Cacna2d1.3	2.72051e-05	-0.25559	0.365	0.518	0.0544101	9	Cacna2d1
Mast4.1	2.92442e-05	-0.305549	0.392	0.513	0.0584884	9	Mast4
Rpl18a.1	4.06779e-05	0.286552	0.892	0.82	0.0813558	9	Rpl18a
Rpl11.1	5.84891e-05	0.314293	0.98	0.906	0.116978	9	Rpl11
6330403K07Rik.1	8.05997e-05	0.263513	0.986	0.927	0.161199	9	6330403K07Rik
Ntm.4	0.000122484	-0.257704	0.392	0.53	0.244968	9	Ntm
Mt1	0.000145145	0.363931	0.493	0.399	0.29029	9	Mt1
Rps3a1	0.000447384	0.278124	0.892	0.819	0.894768	9	Rps3a1
Rnf128.2	0.000653514	-0.255306	0.419	0.514	1	9	Rnf128
Rpl32.1	0.000954839	0.282701	0.872	0.798	1	9	Rpl32
Npy2r.1	0.00108959	0.260026	0.412	0.328	1	9	Npy2r
Rps27	0.0012369	0.293934	0.919	0.861	1	9	Rps27
Lars2	0.00334071	0.321705	0.649	0.65	1	9	Lars2
Gal.6	1.7142e-38	1.63362	0.986	0.307	3.42839e-35	10	Gal
C1ql3	2.76395e-31	0.615663	0.875	0.142	5.52791e-28	10	C1ql3
Gpr50	2.68593e-29	1.52853	0.861	0.237	5.37187e-26	10	Gpr50
Bcl11a.1	4.46529e-29	0.615354	0.931	0.26	8.93058e-26	10	Bcl11a
Dlx1.1	2.57419e-27	0.608183	0.958	0.272	5.14837e-24	10	Dlx1
Calcr	9.1589e-25	0.633899	0.931	0.346	1.83178e-21	10	Calcr
Tac2.6	4.43039e-24	1.75285	0.875	0.272	8.86077e-21	10	Tac2
Ntng1.1	7.30239e-22	0.752553	0.903	0.325	1.46048e-18	10	Ntng1
Esr1.3	9.04753e-22	0.274602	0.972	0.376	1.80951e-18	10	Esr1
Lypd1	2.20557e-21	0.694154	0.861	0.289	4.41115e-18	10	Lypd1
Serpina3n.7	8.73353e-20	-0.684469	0.333	0.587	1.74671e-16	10	Serpina3n
Pex5l	1.3707e-18	0.374389	0.875	0.323	2.74141e-15	10	Pex5l
Pcdh19.6	4.60719e-18	-0.481733	0.208	0.473	9.21438e-15	10	Pcdh19
Sema5a	1.38156e-17	-0.312774	0.167	0.349	2.76311e-14	10	Sema5a
Grin3a.1	6.89365e-17	0.37028	0.875	0.318	1.37873e-13	10	Grin3a
Spock1	2.40294e-16	0.587676	0.958	0.524	4.80589e-13	10	Spock1
Ptgds.1	3.76722e-14	-0.382369	0.292	0.407	7.53444e-11	10	Ptgds
Thsd7a.1	5.06698e-14	0.302572	0.889	0.341	1.0134e-10	10	Thsd7a
Calb2.2	1.08281e-13	-0.27221	0.236	0.413	2.16562e-10	10	Calb2
Nap1l5	1.24782e-13	0.563336	1	0.99	2.49563e-10	10	Nap1l5
Kcnq3.1	5.38564e-13	0.254975	0.903	0.422	1.07713e-09	10	Kcnq3
Crabp1.6	7.22815e-13	-0.268837	0.917	0.333	1.44563e-09	10	Crabp1
Hs6st2.4	7.35302e-13	-0.467494	0.264	0.479	1.4706e-09	10	Hs6st2
Cpne7.4	2.41842e-12	0.255765	0.958	0.493	4.83684e-09	10	Cpne7
Ap1s2.1	5.16779e-12	-0.400326	0.319	0.5	1.03356e-08	10	Ap1s2
Lmo4	7.03547e-12	0.318446	0.806	0.326	1.40709e-08	10	Lmo4
Map7.1	1.82583e-11	-0.376233	0.361	0.537	3.65166e-08	10	Map7
Six3.4	2.98785e-11	-0.396497	0.278	0.412	5.97569e-08	10	Six3
Ogt.1	6.26539e-11	0.5719	0.958	0.611	1.25308e-07	10	Ogt
Glul	6.9481e-11	-0.339098	0.306	0.403	1.38962e-07	10	Glul
Gabrq	3.21521e-10	0.280521	0.917	0.461	6.43042e-07	10	Gabrq
Mbp	5.6887e-10	-0.323103	0.292	0.401	1.13774e-06	10	Mbp
Ptn	7.56866e-10	-0.360518	0.319	0.359	1.51373e-06	10	Ptn
Pcsk2.2	2.19514e-08	0.30855	0.819	0.353	4.39027e-05	10	Pcsk2
Col25a1.2	3.04303e-08	-0.340413	0.375	0.406	6.08605e-05	10	Col25a1
Nrxn3.5	4.32943e-08	0.554552	0.917	0.718	8.65886e-05	10	Nrxn3
Chpt1.1	6.11659e-08	-0.258527	0.347	0.398	0.000122332	10	Chpt1
Mt1.1	2.52579e-07	-0.28275	0.375	0.403	0.000505157	10	Mt1
Gpm6b	2.73077e-07	0.287724	0.861	0.426	0.000546155	10	Gpm6b
Atp2b4.2	8.46643e-07	-0.354579	0.403	0.442	0.00169329	10	Atp2b4
Vgf.6	9.02525e-07	-0.514916	0.389	0.436	0.00180505	10	Vgf
Alcam.6	1.7552e-06	-0.275652	0.389	0.502	0.00351041	10	Alcam
Ptma.1	2.01659e-06	-0.409132	0.611	0.695	0.00403317	10	Ptma
Impact.2	3.73478e-06	-0.419082	0.764	0.876	0.00746956	10	Impact
Pou2f2	4.38461e-06	-0.335238	0.417	0.441	0.00876922	10	Pou2f2
Cspg5	8.78228e-06	-0.257909	0.542	0.616	0.0175646	10	Cspg5
Calb1.7	1.43775e-05	-0.45617	0.472	0.5	0.028755	10	Calb1
Mt3.2	1.85082e-05	-0.336431	0.625	0.698	0.0370164	10	Mt3
Scd2.1	3.89126e-05	0.348968	0.889	0.676	0.0778252	10	Scd2
Sparcl1.1	4.45226e-05	-0.252707	0.472	0.473	0.0890452	10	Sparcl1
Ephb1	5.88282e-05	0.292255	0.639	0.24	0.117656	10	Ephb1
Aldoc.1	6.7534e-05	-0.327366	0.514	0.472	0.135068	10	Aldoc
Itm2c.5	7.98272e-05	0.28895	0.986	0.913	0.159654	10	Itm2c
Marcks.1	8.45814e-05	-0.315231	0.583	0.65	0.169163	10	Marcks
Nr2f2	8.54703e-05	0.436377	0.611	0.161	0.170941	10	Nr2f2
Ptprt.1	8.55079e-05	-0.290852	0.486	0.433	0.171016	10	Ptprt
Chchd10.1	0.000103681	-0.281729	0.542	0.494	0.207363	10	Chchd10
Map1b.1	0.000108351	-0.312139	0.972	0.958	0.216702	10	Map1b
Ttc3.1	0.000159197	0.253874	1	0.996	0.318393	10	Ttc3
Slc1a2.3	0.000191226	-0.36544	0.611	0.629	0.382452	10	Slc1a2
Rpl24.1	0.000196906	0.319619	0.931	0.849	0.393812	10	Rpl24
Apoe.4	0.000218782	-0.495452	0.625	0.622	0.437565	10	Apoe
Cnr1	0.000257317	0.409379	0.639	0.245	0.514634	10	Cnr1
Zdbf2.2	0.000321063	0.29515	0.986	0.729	0.642127	10	Zdbf2
Ar.2	0.000354891	0.379115	0.722	0.429	0.709782	10	Ar
Tmsb4x.4	0.000634666	-0.348651	0.903	0.901	1	10	Tmsb4x
Pcdh9.2	0.000670812	-0.483127	0.708	0.604	1	10	Pcdh9
Zbtb20.2	0.000684269	0.372554	1	0.897	1	10	Zbtb20
Celf4.1	0.000759102	0.261881	1	0.927	1	10	Celf4
mt-Nd5.1	0.000774954	-0.319292	0.861	0.861	1	10	mt-Nd5
Pik3r1	0.00109826	-0.293859	0.514	0.435	1	10	Pik3r1
Gpx3.3	0.0013294	-0.287635	0.708	0.729	1	10	Gpx3
Rpl32.2	0.001384	0.291402	0.875	0.8	1	10	Rpl32
Oprk1.1	0.00178181	0.302336	0.653	0.352	1	10	Oprk1
Rpl27a.4	0.00208502	0.2503	0.972	0.887	1	10	Rpl27a
Ppp1r9a.4	0.00216264	-0.330251	0.722	0.702	1	10	Ppp1r9a
Hap1.3	0.00223999	0.269952	0.944	0.968	1	10	Hap1
Lrp1b.3	0.00336357	0.371622	0.681	0.415	1	10	Lrp1b
Tubb3.1	0.00365873	-0.250657	0.667	0.624	1	10	Tubb3
Cst3.3	0.00492298	-0.327298	0.889	0.9	1	10	Cst3
Ntrk2.3	0.00502541	-0.273543	0.861	0.796	1	10	Ntrk2
Rpl38.2	0.00652442	0.253953	0.958	0.928	1	10	Rpl38
Rnf128.3	0.00799675	-0.258986	0.944	0.503	1	10	Rnf128
Slc18a2.1	1.46928e-46	1.62281	0.986	0.393	2.93856e-43	11	Slc18a2
Slc6a3	6.75266e-43	1.13941	0.943	0.292	1.35053e-39	11	Slc6a3
Th.1	2.65759e-40	1.00466	0.943	0.231	5.31518e-37	11	Th
Mylk	2.28463e-35	0.453573	0.857	0.274	4.56927e-32	11	Mylk
Scn7a	1.20697e-31	0.712142	0.843	0.313	2.41394e-28	11	Scn7a
Cgnl1	4.89994e-28	0.365527	0.771	0.189	9.79988e-25	11	Cgnl1
Col6a1	1.34075e-24	0.417212	0.829	0.326	2.68151e-21	11	Col6a1
Zfp536	2.57794e-24	0.261901	0.8	0.311	5.15589e-21	11	Zfp536
Msn	4.22931e-21	0.296458	0.743	0.29	8.45862e-18	11	Msn
Pgr15l.1	5.35455e-21	0.325992	0.829	0.311	1.07091e-17	11	Pgr15l
Col18a1.1	1.03475e-20	0.30284	0.843	0.458	2.06951e-17	11	Col18a1
Otof	2.99972e-20	0.73801	0.8	0.301	5.99944e-17	11	Otof
Lhx1	1.49866e-17	0.521663	0.714	0.184	2.99732e-14	11	Lhx1
Nnat.4	1.63164e-17	0.79121	0.929	0.69	3.26329e-14	11	Nnat
Pde1a.2	1.85924e-17	0.494143	0.829	0.328	3.71848e-14	11	Pde1a
Prlr.8	1.10042e-16	0.701035	0.957	0.558	2.20085e-13	11	Prlr
Sema6d	1.13566e-15	0.389477	0.743	0.263	2.27132e-12	11	Sema6d
Dock10	1.88122e-15	0.35675	0.814	0.361	3.76245e-12	11	Dock10
Bcl11b.1	4.19943e-15	0.296058	0.757	0.436	8.39886e-12	11	Bcl11b
Rab3b	4.43753e-15	0.550706	0.786	0.306	8.87506e-12	11	Rab3b
Snca.1	6.04204e-15	0.373561	0.871	0.411	1.20841e-11	11	Snca
Lypd1.1	1.13711e-14	0.26665	0.757	0.291	2.27422e-11	11	Lypd1
Dgkk.1	1.28334e-14	0.401651	0.857	0.365	2.56668e-11	11	Dgkk
Sox6	1.09244e-13	0.323218	0.657	0.215	2.18488e-10	11	Sox6
Tmem176b.1	2.10103e-13	0.347841	0.814	0.328	4.20206e-10	11	Tmem176b
Cadm1.2	4.08604e-13	0.654694	0.929	0.691	8.17208e-10	11	Cadm1
Pld5.1	8.17076e-13	0.266746	0.729	0.31	1.63415e-09	11	Pld5
Grik1.1	8.50473e-13	0.335108	0.771	0.323	1.70095e-09	11	Grik1
Ntng1.2	3.42776e-12	0.482317	0.786	0.328	6.85552e-09	11	Ntng1
Cdh13.1	4.17737e-12	0.340414	0.757	0.269	8.35474e-09	11	Cdh13
Acvr1c.3	1.00479e-11	-0.451838	0.314	0.553	2.00958e-08	11	Acvr1c
Dner.2	6.16271e-11	0.480501	0.914	0.558	1.23254e-07	11	Dner
Cplx2.3	1.0086e-10	0.426008	0.857	0.509	2.0172e-07	11	Cplx2
Slc24a2	1.12938e-10	0.291775	0.8	0.392	2.25875e-07	11	Slc24a2
Rasgrp1.2	1.20373e-10	0.266589	0.814	0.461	2.40746e-07	11	Rasgrp1
Qk	5.91694e-10	0.277521	0.814	0.361	1.18339e-06	11	Qk
Epha5.6	8.12501e-10	0.562417	0.886	0.49	1.625e-06	11	Epha5
Cadm2.1	3.2611e-09	0.274292	0.786	0.368	6.5222e-06	11	Cadm2
Arhgap6.4	3.2821e-09	0.52926	0.814	0.561	6.56419e-06	11	Arhgap6
Ncam1	3.59942e-09	-0.533829	0.9	0.934	7.19883e-06	11	Ncam1
Gpr83	4.37534e-09	0.407937	0.671	0.307	8.75069e-06	11	Gpr83
Pcdh19.7	5.31612e-09	0.316363	0.857	0.461	1.06322e-05	11	Pcdh19
Pcp4.4	5.91043e-09	0.483401	0.9	0.635	1.18209e-05	11	Pcp4
Dlx1.2	6.20751e-09	0.533486	0.714	0.276	1.2415e-05	11	Dlx1
Cited1.4	7.70525e-09	-0.48802	0.414	0.609	1.54105e-05	11	Cited1
Syt1.3	1.33728e-08	0.44732	0.957	0.733	2.67456e-05	11	Syt1
Scn9a.3	1.93323e-08	0.391962	0.957	0.621	3.86647e-05	11	Scn9a
Dlx6os1.1	2.39855e-08	0.306669	0.657	0.363	4.7971e-05	11	Dlx6os1
Ttc3.2	2.87769e-08	-0.351721	0.986	0.996	5.75538e-05	11	Ttc3
Ncald.2	3.14407e-08	0.34847	0.929	0.629	6.28815e-05	11	Ncald
Pclo.2	1.43429e-07	0.467169	0.957	0.76	0.000286857	11	Pclo
Serpini1.2	1.61287e-07	0.356781	0.771	0.455	0.000322574	11	Serpini1
Zfhx4.1	1.71275e-07	-0.299995	0.229	0.355	0.00034255	11	Zfhx4
Vsnl1.2	1.78474e-07	0.351327	0.814	0.452	0.000356949	11	Vsnl1
Zfhx3.5	4.11888e-07	-0.447829	0.3	0.534	0.000823777	11	Zfhx3
Atp1a1.3	1.51035e-06	-0.525222	0.743	0.787	0.0030207	11	Atp1a1
Hs6st2.5	1.77339e-06	-0.414629	0.3	0.478	0.00354678	11	Hs6st2
Rrbp1	2.18336e-06	0.291445	0.771	0.443	0.00436672	11	Rrbp1
Six3.5	2.66303e-06	0.25383	0.757	0.403	0.00532606	11	Six3
Rpl9.2	3.67302e-06	-0.410148	0.943	0.954	0.00734604	11	Rpl9
Camk2d.1	6.21246e-06	0.362901	0.857	0.576	0.0124249	11	Camk2d
Opcml.2	8.55433e-06	0.369049	0.771	0.475	0.0171087	11	Opcml
Peg3.2	9.54961e-06	0.282798	1	0.981	0.0190992	11	Peg3
Pcdh11x.6	1.39081e-05	-0.340286	0.314	0.412	0.0278161	11	Pcdh11x
Snap25.2	1.43547e-05	0.318215	0.957	0.83	0.0287093	11	Snap25
Isl1.2	1.76865e-05	-0.485508	0.571	0.609	0.035373	11	Isl1
Uchl1.1	1.81008e-05	0.286629	0.971	0.927	0.0362017	11	Uchl1
Ddc	2.7249e-05	0.415573	0.6	0.304	0.054498	11	Ddc
Atp2b1.5	2.8484e-05	-0.430591	0.629	0.72	0.0569679	11	Atp2b1
Pgrmc1.4	3.3382e-05	-0.405535	0.914	0.926	0.0667639	11	Pgrmc1
Col25a1.3	6.85445e-05	-0.288851	0.329	0.407	0.137089	11	Col25a1
Rps8.3	7.83333e-05	-0.340099	0.871	0.952	0.156667	11	Rps8
Srrm2.2	9.25e-05	-0.375194	0.9	0.921	0.185	11	Srrm2
Zwint	0.000136839	0.275516	0.957	0.927	0.273677	11	Zwint
Zbtb20.3	0.000219609	-0.379111	0.843	0.9	0.439218	11	Zbtb20
Rps27.1	0.000250055	-0.328243	0.786	0.864	0.50011	11	Rps27
Resp18.5	0.000360762	-0.427163	0.771	0.805	0.721523	11	Resp18
Ntm.5	0.00043447	0.266346	0.786	0.52	0.868939	11	Ntm
Cacna2d1.4	0.000495477	0.254427	0.757	0.508	0.990954	11	Cacna2d1
Npy.8	0.000693296	-1.36711	0.471	0.484	1	11	Npy
Tenm1.5	0.00105272	-0.370573	0.457	0.487	1	11	Tenm1
Gria3.4	0.00132211	-0.30558	0.514	0.582	1	11	Gria3
Rab3c.5	0.00134258	-0.337004	0.829	0.848	1	11	Rab3c
Miat.2	0.00150531	-0.332186	0.643	0.674	1	11	Miat
Rmst.1	0.00159668	-0.311418	0.386	0.417	1	11	Rmst
Gabrg1.3	0.00187258	0.258091	0.786	0.583	1	11	Gabrg1
Ptprd.2	0.00218095	-0.274482	0.443	0.499	1	11	Ptprd
Bin1.1	0.00336148	0.255034	0.886	0.627	1	11	Bin1
Irs4.5	0.00350608	-0.537781	0.7	0.619	1	11	Irs4
Edil3.6	0.00351043	-0.254649	0.5	0.524	1	11	Edil3
Pitpnc1.1	0.00354652	-0.315821	0.471	0.478	1	11	Pitpnc1
Rpl34	0.00440794	-0.29675	0.729	0.707	1	11	Rpl34
Ghrh.10	0.00681319	-0.531686	0.557	0.307	1	11	Ghrh
Syt4.3	0.00750972	-0.274192	0.786	0.788	1	11	Syt4
Grm5.4	0.00784691	-0.343346	0.471	0.467	1	11	Grm5
Agrp.8	0.00861199	-1.26249	0.643	0.594	1	11	Agrp
Unc5d.3	0.00881865	-0.281719	0.629	0.66	1	11	Unc5d
