# Supplementary material for: Cell-specific transcriptome changes in the hypothalamic arcuate nucleus in a mouse deoxycorticosterone acetate-salt model of hypertension
Source: Front Cell Neurosci. 2023 May 24;17:1207350. doi: 10.3389/fncel.2023.1207350 (PMC10244568; doi:10.3389/fncel.2023.1207350)
Supplement: Supplementary file 3 [file Data_Sheet_3.XLSX]

## Sheet: Table S7 Act Microglia Sub Mrks
	p_val	avg_log2FC	pct.1	pct.2	p_val_adj	cluster	gene
Csf2rb	5.60507e-35	0.385609	0.985	0.861	1.12101e-31	0	Csf2rb
Hpgd	4.34651e-29	0.250186	0.927	0.361	8.69302e-26	0	Hpgd
Pnpla7	3.66577e-24	0.306224	0.788	0.151	7.33154e-21	0	Pnpla7
Dnase2a	7.48064e-24	-0.271186	0.219	0.739	1.49613e-20	0	Dnase2a
Cd9	2.59018e-22	0.307903	0.832	0.214	5.18035e-19	0	Cd9
Rhoh	1.40234e-17	0.359288	0.445	0.134	2.80467e-14	0	Rhoh
Gpr37l1	2.76853e-17	0.327936	0.715	0.109	5.53706e-14	0	Gpr37l1
Ncf1	8.10398e-17	0.336323	0.518	0.193	1.6208e-13	0	Ncf1
Bcan	3.20856e-16	0.433728	0.708	0.172	6.41712e-13	0	Bcan
Trim12a	1.65556e-15	0.275268	0.328	0.126	3.31111e-12	0	Trim12a
Tubb2b	1.80372e-14	0.27874	0.854	0.294	3.60743e-11	0	Tubb2b
Gstm1	5.83599e-14	0.417511	0.599	0.16	1.1672e-10	0	Gstm1
Slc6a1	6.24738e-14	0.260415	0.759	0.235	1.24948e-10	0	Slc6a1
Hepacam	3.05359e-13	0.270519	0.759	0.332	6.10718e-10	0	Hepacam
Ddhd1	1.92239e-12	0.25452	0.708	0.189	3.84477e-09	0	Ddhd1
Trps1	8.30057e-12	0.252917	0.533	0.059	1.66011e-08	0	Trps1
Gm3764	1.0009e-11	0.447115	0.445	0.113	2.0018e-08	0	Gm3764
Elavl2	2.78361e-11	0.262681	0.803	0.265	5.56722e-08	0	Elavl2
Serpine2	2.04092e-10	0.360346	0.569	0.286	4.08183e-07	0	Serpine2
Asrgl1	2.83148e-10	0.355927	0.409	0.118	5.66297e-07	0	Asrgl1
Oxt	5.22046e-10	-0.604698	0.263	0.197	1.04409e-06	0	Oxt
Csf3r	6.07985e-10	-0.348914	0.416	0.836	1.21597e-06	0	Csf3r
Plpp3	1.01398e-09	0.433577	0.839	0.777	2.02795e-06	0	Plpp3
Tmem35a	8.46096e-09	0.298975	0.818	0.765	1.69219e-05	0	Tmem35a
Paqr8	1.42416e-08	0.282868	0.569	0.252	2.84832e-05	0	Paqr8
Mal	1.42998e-08	0.293247	0.328	0.714	2.85996e-05	0	Mal
Calb1	1.65489e-08	-0.265217	0.321	0.273	3.30979e-05	0	Calb1
Selenop	2.24868e-08	0.311332	0.927	0.878	4.49736e-05	0	Selenop
Itgam	3.01118e-08	-0.347812	0.555	0.891	6.02235e-05	0	Itgam
Ncdn	3.3348e-07	0.287433	0.584	0.311	0.000666961	0	Ncdn
Bsg	6.84907e-07	0.405177	0.949	0.782	0.00136981	0	Bsg
Stmn1	3.64198e-06	0.343994	0.876	0.815	0.00728397	0	Stmn1
Rps10	1.14944e-05	0.285799	0.934	0.891	0.0229888	0	Rps10
Cyth4	1.74325e-05	-0.372344	0.679	0.929	0.0348649	0	Cyth4
Thy1	2.53086e-05	-0.31684	0.474	0.479	0.0506172	0	Thy1
Tmem130	4.54474e-05	0.260927	0.803	0.786	0.0908948	0	Tmem130
Lair1	7.24748e-05	0.352633	0.891	0.857	0.14495	0	Lair1
Nap1l5	8.43626e-05	0.275004	1	1	0.168725	0	Nap1l5
Cartpt	9.72811e-05	-0.383825	0.766	0.811	0.194562	0	Cartpt
Ndrg2	0.000130137	0.278339	0.876	0.622	0.260275	0	Ndrg2
Impact	0.000131495	0.262216	0.927	0.912	0.262989	0	Impact
Pcdh9	0.000172162	0.28452	0.431	0.231	0.344324	0	Pcdh9
Peg3	0.00024277	-0.30761	0.985	1	0.48554	0	Peg3
Lars2	0.000258405	0.292619	0.869	0.874	0.51681	0	Lars2
Cadm1	0.000266054	0.258172	0.766	0.752	0.532108	0	Cadm1
S100b	0.000367591	0.263064	0.358	0.122	0.735182	0	S100b
Mt3	0.000451537	0.287538	0.971	0.882	0.903074	0	Mt3
Syt11	0.00100644	0.29024	0.956	0.937	1	0	Syt11
Atp2b1	0.00148044	-0.294847	0.745	0.887	1	0	Atp2b1
Atp1a2	0.00198362	0.392054	0.664	0.395	1	0	Atp1a2
Rgs2	0.00298109	0.261667	0.905	0.861	1	0	Rgs2
Nrp2	0.00328064	0.257792	0.555	0.353	1	0	Nrp2
Itih3	0.00375448	0.524634	0.467	0.424	1	0	Itih3
Syne1	0.00483953	0.327931	0.686	0.798	1	0	Syne1
Ly86	0.00500898	-0.343462	0.81	0.929	1	0	Ly86
Marcks	0.00903845	-0.30999	0.92	0.924	1	0	Marcks
Gpld1	0.00967527	0.268852	0.766	0.765	1	0	Gpld1
Gm3764.1	1.72534e-28	-0.456329	0.019	0.319	3.45068e-25	1	Gm3764
Ncf1.1	5.26066e-24	-0.375362	0.124	0.385	1.05213e-20	1	Ncf1
Pcdh9.1	1.13156e-22	-0.401492	0.086	0.389	2.26312e-19	1	Pcdh9
Ddhd1.1	5.06328e-21	-0.257946	0.067	0.5	1.01266e-17	1	Ddhd1
Paqr8.1	2.56611e-20	-0.289042	0.086	0.478	5.13222e-17	1	Paqr8
Pitpnc1	1.16248e-18	-0.331587	0.095	0.359	2.32496e-15	1	Pitpnc1
Gabra1	1.53889e-18	-0.317531	0.171	0.33	3.07777e-15	1	Gabra1
Itih3.1	2.61348e-17	-0.421111	0.181	0.541	5.22695e-14	1	Itih3
Unc5d	2.93337e-17	-0.258266	0.219	0.615	5.86674e-14	1	Unc5d
Itgam.1	9.12056e-15	0.433868	0.971	0.689	1.82411e-11	1	Itgam
Epha5	9.1952e-15	-0.251975	0.076	0.307	1.83904e-11	1	Epha5
Hs6st2	2.2716e-14	-0.311699	0.086	0.393	4.5432e-11	1	Hs6st2
Elavl2.1	1.2377e-13	-0.391192	0.171	0.574	2.4754e-10	1	Elavl2
Cartpt.1	2.33713e-13	0.295559	0.943	0.737	4.67426e-10	1	Cartpt
Gstm1.1	6.22907e-13	-0.351238	0.133	0.393	1.24581e-09	1	Gstm1
Csrp1	3.12204e-12	-0.284462	0.048	0.3	6.24408e-09	1	Csrp1
Sall1	9.23339e-12	0.30428	0.981	0.822	1.84668e-08	1	Sall1
Csf3r.1	2.2204e-11	0.418919	0.933	0.585	4.4408e-08	1	Csf3r
Cadm2	3.65919e-11	-0.375372	0.276	0.589	7.31837e-08	1	Cadm2
Bc1	1.03143e-10	-0.331782	0.267	0.596	2.06286e-07	1	Bc1
Ncdn.1	3.75452e-10	-0.357339	0.2	0.493	7.50903e-07	1	Ncdn
Bcan.1	4.00796e-10	-0.336907	0.143	0.456	8.01592e-07	1	Bcan
Slc6a1.1	5.94303e-10	-0.376088	0.133	0.541	1.18861e-06	1	Slc6a1
Impact.1	8.7457e-10	-0.440623	0.943	0.907	1.74914e-06	1	Impact
Ywhag	1.15035e-08	-0.386327	0.962	0.885	2.30071e-05	1	Ywhag
Ptprd	1.18487e-08	-0.356839	0.057	0.467	2.36974e-05	1	Ptprd
Lpcat2	4.3964e-08	0.307068	1	0.933	8.7928e-05	1	Lpcat2
Zeb2	5.12093e-08	0.27602	0.971	0.593	0.000102419	1	Zeb2
Hap1	6.81019e-08	-0.371891	0.981	0.944	0.000136204	1	Hap1
Mafb	1.70962e-07	0.317717	0.962	0.696	0.000341925	1	Mafb
Cacna2d1	3.20972e-07	-0.339649	0.143	0.356	0.000641944	1	Cacna2d1
Mt2	4.67032e-07	-0.283121	0.105	0.326	0.000934064	1	Mt2
Ptprn	6.36849e-07	-0.360946	0.648	0.685	0.0012737	1	Ptprn
Csf2rb.1	6.43631e-07	-0.267225	0.981	0.878	0.00128726	1	Csf2rb
Selplg	6.63788e-07	0.423365	1	0.807	0.00132758	1	Selplg
Gpr34	6.70878e-07	0.285346	0.962	0.704	0.00134176	1	Gpr34
Map1b	9.62276e-07	-0.319293	0.99	0.967	0.00192455	1	Map1b
Fnbp1	1.02718e-06	-0.251619	0.133	0.304	0.00205435	1	Fnbp1
Grk3	1.72449e-06	-0.324959	0.057	0.478	0.00344898	1	Grk3
Zdbf2	2.00456e-06	-0.367605	0.105	0.459	0.00400913	1	Zdbf2
Hsp90aa1	3.22107e-06	-0.332835	1	0.993	0.00644214	1	Hsp90aa1
Plpp3.1	5.17309e-06	-0.289307	0.924	0.752	0.0103462	1	Plpp3
Ly6h	5.37875e-06	-0.29042	0.99	0.974	0.0107575	1	Ly6h
Marcks.1	5.68497e-06	0.484228	0.99	0.896	0.0113699	1	Marcks
Spock1	7.07086e-06	-0.352736	0.105	0.333	0.0141417	1	Spock1
Calm1	9.96224e-06	-0.263187	1	0.993	0.0199245	1	Calm1
Atp1a2.1	1.24198e-05	-0.300822	0.371	0.541	0.0248395	1	Atp1a2
Ly86.1	1.62788e-05	0.328404	1	0.841	0.0325577	1	Ly86
Dmd	2.53791e-05	-0.290357	0.095	0.489	0.0507582	1	Dmd
Pcsk1n	3.03962e-05	-0.315348	1	0.993	0.0607924	1	Pcsk1n
Snhg11	3.16095e-05	-0.803188	1	0.985	0.063219	1	Snhg11
Slc1a3	4.65359e-05	-0.368403	0.257	0.57	0.0930717	1	Slc1a3
C1qc	5.8375e-05	0.407791	1	0.974	0.11675	1	C1qc
Meg3	6.86153e-05	-0.862765	1	1	0.137231	1	Meg3
Nap1l5.1	7.64014e-05	-0.381647	1	1	0.152803	1	Nap1l5
Syne1.1	0.000189332	-0.368155	0.914	0.696	0.378664	1	Syne1
Arhgap45	0.000195719	0.261917	1	0.915	0.391438	1	Arhgap45
Unc93b1	0.000228	0.321213	0.981	0.893	0.456	1	Unc93b1
Hexb	0.000232109	0.381902	1	0.985	0.464218	1	Hexb
Ndrg2.1	0.000268605	-0.251558	0.543	0.781	0.53721	1	Ndrg2
Tubb2a	0.000405073	-0.323657	0.952	0.778	0.810147	1	Tubb2a
Csf1r	0.000567207	0.343865	0.99	0.956	1	1	Csf1r
Stmn4	0.000576195	-0.282397	0.905	0.578	1	1	Stmn4
Gabrb1	0.00121648	-0.311368	0.762	0.622	1	1	Gabrb1
Slc4a4	0.00132412	-0.261811	0.162	0.359	1	1	Slc4a4
Rpl41	0.00133363	0.253735	1	0.989	1	1	Rpl41
Glul	0.00163921	0.268881	0.981	0.689	1	1	Glul
Rpl26	0.00281802	0.269156	0.971	0.889	1	1	Rpl26
Ecel1	0.00320018	-0.265999	0.914	0.722	1	1	Ecel1
Pmch	0.00338885	1.27525	0.571	0.452	1	1	Pmch
Vgf	0.00450832	-0.258111	0.105	0.315	1	1	Vgf
Trem2	0.00525143	0.32253	0.571	0.6	1	1	Trem2
Hpgds	0.00544531	0.313979	1	0.959	1	1	Hpgds
Rps21	0.00548186	0.258463	1	0.985	1	1	Rps21
5031439G07Rik	0.00589559	-0.263054	0.029	0.267	1	1	5031439G07Rik
Kcnq1ot1	0.00883407	-0.354697	1	0.948	1	1	Kcnq1ot1
Meg3.1	2.5101e-22	1.5024	1	1	5.02019e-19	2	Meg3
Snhg11.1	2.10729e-20	1.26772	1	0.988	4.21458e-17	2	Snhg11
Ptprd.1	1.59698e-14	0.509751	0.857	0.276	3.19395e-11	2	Ptprd
Sorbs2	4.2588e-13	0.337617	0.959	0.604	8.51759e-10	2	Sorbs2
Rmst	6.09865e-13	0.339972	0.939	0.5	1.21973e-09	2	Rmst
Cst3	4.26256e-12	-0.88577	1	1	8.52512e-09	2	Cst3
Rorb	8.37917e-12	0.354974	0.939	0.564	1.67583e-08	2	Rorb
Ecel1.1	9.92886e-12	0.260843	0.98	0.745	1.98577e-08	2	Ecel1
mt-Co1	2.71899e-11	-0.557799	1	1	5.43799e-08	2	mt-Co1
Dmd.1	6.05229e-11	0.355722	0.857	0.307	1.21046e-07	2	Dmd
Zic1	1.07012e-10	0.357234	0.735	0.202	2.14023e-07	2	Zic1
C230004F18Rik	1.12518e-10	0.517909	0.98	0.684	2.25035e-07	2	C230004F18Rik
Peg3.1	1.47475e-10	0.816895	1	0.994	2.94949e-07	2	Peg3
Atp1b1	4.25544e-10	0.700881	1	0.979	8.51087e-07	2	Atp1b1
Nts	1.37999e-09	0.624656	0.959	0.561	2.75997e-06	2	Nts
Slc24a2	1.71537e-09	0.335471	1	0.696	3.43074e-06	2	Slc24a2
Hpgd.1	1.86662e-09	-0.261794	0.245	0.617	3.73325e-06	2	Hpgd
Brinp3	2.12208e-09	0.255906	0.878	0.518	4.24415e-06	2	Brinp3
Meis2	2.95399e-09	0.289431	1	0.874	5.90798e-06	2	Meis2
Cadm2.1	4.79458e-09	0.529982	0.898	0.442	9.58916e-06	2	Cadm2
Abca2	1.07061e-08	0.328226	0.673	0.221	2.14122e-05	2	Abca2
Adgrl2	1.24325e-08	0.31297	0.959	0.798	2.48651e-05	2	Adgrl2
Syne1.2	2.74542e-08	0.42678	0.98	0.724	5.49083e-05	2	Syne1
Miat	2.84315e-08	0.46433	0.449	0.172	5.68629e-05	2	Miat
Ttc3	4.29252e-08	0.558568	0.98	1	8.58504e-05	2	Ttc3
Gm45159	4.98561e-08	0.339746	0.939	0.601	9.97123e-05	2	Gm45159
Ctsd	5.95801e-08	-0.779863	1	1	0.00011916	2	Ctsd
Htr2c	6.96875e-08	0.342689	0.898	0.755	0.000139375	2	Htr2c
Gria2	7.13461e-08	0.629374	0.898	0.957	0.000142692	2	Gria2
Penk	9.75913e-08	0.268842	0.796	0.344	0.000195183	2	Penk
Gria3	1.07975e-07	0.363555	0.939	0.58	0.000215949	2	Gria3
Cplx2	1.08395e-07	0.408303	0.469	0.175	0.000216789	2	Cplx2
Cdc37l1	1.30198e-07	0.318821	0.98	0.656	0.000260395	2	Cdc37l1
Gm42418	1.38402e-07	-0.69828	1	1	0.000276805	2	Gm42418
Atp2b1.1	1.7246e-07	0.487716	1	0.81	0.000344919	2	Atp2b1
Aatk	1.8506e-07	0.572556	0.612	0.169	0.000370119	2	Aatk
C1qb	3.47487e-07	-0.796537	1	0.994	0.000694974	2	C1qb
Kcnq1ot1.1	3.68379e-07	0.601493	1	0.957	0.000736758	2	Kcnq1ot1
Hexb.1	4.50688e-07	-0.792526	1	0.988	0.000901376	2	Hexb
Rtn1	1.86099e-06	0.445845	1	0.972	0.00372198	2	Rtn1
App	3.53e-06	0.481577	0.939	0.988	0.00705999	2	App
Nptx1	3.7785e-06	0.397071	0.306	0.11	0.007557	2	Nptx1
Rnf128	5.60023e-06	0.267604	0.898	0.739	0.0112005	2	Rnf128
Ntm	6.69309e-06	0.5438	0.878	0.693	0.0133862	2	Ntm
Dgkb	7.14737e-06	0.320749	0.98	0.666	0.0142947	2	Dgkb
Epha5.1	7.55937e-06	0.289121	0.49	0.206	0.0151187	2	Epha5
Pcdh9.2	1.36884e-05	0.382462	0.612	0.258	0.0273768	2	Pcdh9
Nap1l5.2	1.39803e-05	0.368658	1	1	0.0279606	2	Nap1l5
Pclo	2.04049e-05	0.562188	0.98	0.788	0.0408099	2	Pclo
Dpy19l1	2.32974e-05	0.257173	0.959	0.54	0.0465947	2	Dpy19l1
Ctsc	2.87147e-05	-0.284522	0.98	0.917	0.0574295	2	Ctsc
Malat1	3.02082e-05	0.314166	1	1	0.0604165	2	Malat1
Calb2	3.14671e-05	0.642482	0.98	0.675	0.0629343	2	Calb2
Pmch.1	3.20961e-05	-0.297769	0.245	0.521	0.0641923	2	Pmch
Tmsb4x	4.39363e-05	-0.519157	0.98	0.988	0.0878726	2	Tmsb4x
Cspg5	4.66274e-05	0.487524	0.878	0.644	0.0932548	2	Cspg5
Dpp10	4.71259e-05	0.313848	0.939	0.745	0.0942518	2	Dpp10
Ptn	0.000117002	0.260289	0.939	0.681	0.234003	2	Ptn
mt-Nd3	0.000122371	-0.586826	0.694	0.908	0.244742	2	mt-Nd3
Snap25	0.000161512	0.357657	0.959	0.96	0.323025	2	Snap25
Sst	0.000170602	0.345265	0.837	0.626	0.341203	2	Sst
Celf2	0.000180464	0.397271	1	0.794	0.360929	2	Celf2
Ywhag.1	0.000248742	0.397438	0.918	0.905	0.497485	2	Ywhag
Rps12	0.000250057	-0.44613	0.735	0.831	0.500113	2	Rps12
Calm1.1	0.000256532	0.327877	0.98	0.997	0.513064	2	Calm1
mt-Nd5	0.00026677	-0.425866	0.98	0.988	0.53354	2	mt-Nd5
Chgb	0.000294318	0.523422	0.653	0.531	0.588636	2	Chgb
Sncb	0.000309978	0.516495	0.714	0.561	0.619956	2	Sncb
Bsg.1	0.000317113	-0.401532	0.653	0.871	0.634226	2	Bsg
Tubb3	0.000333688	0.274595	0.755	0.54	0.667376	2	Tubb3
Rps23	0.000360023	-0.475858	0.837	0.942	0.720047	2	Rps23
Pcsk2	0.000375288	0.332592	0.388	0.178	0.750577	2	Pcsk2
Impact.2	0.000388341	0.334429	0.918	0.917	0.776682	2	Impact
Spock1.1	0.000396539	0.351035	0.49	0.236	0.793078	2	Spock1
C1qc.1	0.000419516	-0.514669	1	0.979	0.839032	2	C1qc
Ly6h.1	0.000450393	0.402207	0.918	0.988	0.900787	2	Ly6h
Hap1.1	0.000451911	0.284197	0.878	0.966	0.903821	2	Hap1
Ppia	0.000598228	0.316683	0.98	0.991	1	2	Ppia
Gabra1.1	0.000607246	0.408367	0.571	0.242	1	2	Gabra1
Ghrh	0.000807083	0.455809	0.714	0.561	1	2	Ghrh
Syt4	0.000814604	0.302511	0.837	0.745	1	2	Syt4
Gnas	0.000878315	0.35172	1	0.997	1	2	Gnas
Chl1	0.000942052	0.498363	0.857	0.773	1	2	Chl1
Dlk1	0.00103364	0.405001	0.98	0.748	1	2	Dlk1
Syt1	0.00109324	0.419542	0.898	0.939	1	2	Syt1
Rgs16	0.00117755	0.252566	0.837	0.472	1	2	Rgs16
Nell1	0.00124353	0.377241	0.347	0.089	1	2	Nell1
Map1b.1	0.00125115	0.297475	0.898	0.985	1	2	Map1b
Igf1r	0.00138604	0.327415	0.959	0.718	1	2	Igf1r
Laptm5	0.00152546	-0.525468	1	0.966	1	2	Laptm5
Resp18	0.0016075	0.30386	0.735	0.712	1	2	Resp18
Pam	0.00188975	0.278712	0.959	0.733	1	2	Pam
Gad1	0.00206307	0.511276	0.673	0.549	1	2	Gad1
Ahi1	0.00235846	0.431756	0.939	0.988	1	2	Ahi1
Cplx1	0.00246311	0.338439	0.388	0.147	1	2	Cplx1
Lsamp	0.00269672	0.421818	0.653	0.66	1	2	Lsamp
Apbb1ip	0.00295469	-0.32411	0.98	0.914	1	2	Apbb1ip
Pcdh17	0.00328774	0.387236	0.571	0.408	1	2	Pcdh17
Thy1.1	0.00346718	0.46784	0.571	0.463	1	2	Thy1
Lrp1b	0.00366038	0.493072	0.469	0.187	1	2	Lrp1b
Apoe	0.0036747	-0.382023	0.918	0.985	1	2	Apoe
Auts2	0.00385697	0.572671	0.592	0.537	1	2	Auts2
Tnr	0.00420727	0.257439	0.286	0.104	1	2	Tnr
Rpl37a	0.00429938	-0.322879	0.878	0.975	1	2	Rpl37a
Serpini1	0.00436186	0.338695	0.776	0.66	1	2	Serpini1
Pcsk1n.1	0.00438587	0.278169	1	0.994	1	2	Pcsk1n
Rpl37	0.00486656	-0.34386	0.939	0.988	1	2	Rpl37
Lair1.1	0.00495152	-0.455823	0.918	0.862	1	2	Lair1
Sparc	0.00496234	-0.416486	0.837	0.914	1	2	Sparc
Vsnl1	0.00555314	0.32806	0.735	0.635	1	2	Vsnl1
Parm1	0.00575145	0.355089	0.918	0.696	1	2	Parm1
Vgf.1	0.00623623	0.599847	0.571	0.209	1	2	Vgf
Scg2	0.00640689	0.371977	0.796	0.828	1	2	Scg2
Pcdh19	0.00663111	0.353321	0.469	0.163	1	2	Pcdh19
Tmem119	0.00665846	-0.367889	0.551	0.525	1	2	Tmem119
Pld4	0.00683128	-0.337794	0.49	0.583	1	2	Pld4
Fth1	0.00691922	-0.309884	0.98	0.991	1	2	Fth1
Zdbf2.1	0.0071661	0.303496	0.571	0.328	1	2	Zdbf2
Rps3a1	0.00745381	-0.311352	1	0.975	1	2	Rps3a1
Maf	0.00769106	-0.328322	0.449	0.61	1	2	Maf
C1qa	0.00814278	-0.581593	0.837	0.773	1	2	C1qa
Pgrmc1	0.0084784	0.267358	0.98	0.972	1	2	Pgrmc1
Calb1.1	0.00854513	0.465262	0.51	0.258	1	2	Calb1
Trem2.1	0.00859265	-0.46555	0.551	0.598	1	2	Trem2
Csf1r.1	0.00933621	-0.411461	0.98	0.963	1	2	Csf1r
Gjc3	6.38631e-15	0.312991	0.955	0.517	1.27726e-11	3	Gjc3
Lmo4	1.11883e-14	0.355213	0.977	0.761	2.23766e-11	3	Lmo4
Otp	8.50495e-13	-0.250511	0	0.329	1.70099e-09	3	Otp
Hpgd.2	1.81789e-12	-0.256706	0.159	0.622	3.63579e-09	3	Hpgd
Pex5l	5.33049e-12	0.259766	0.955	0.281	1.0661e-08	3	Pex5l
Maf.1	6.28033e-11	-0.701035	0.159	0.647	1.25607e-07	3	Maf
Tcn2	4.32509e-10	-0.276092	0.091	0.387	8.65019e-07	3	Tcn2
Pld4.1	6.40165e-10	-0.496754	0.227	0.616	1.28033e-06	3	Pld4
Pnpla7.1	2.21228e-09	-0.283353	0.114	0.42	4.42455e-06	3	Pnpla7
Ar	5.30501e-09	0.288546	0.932	0.369	1.061e-05	3	Ar
Ctsc.1	7.48184e-09	-0.383133	1	0.915	1.49637e-05	3	Ctsc
Ncald	7.84666e-09	-0.360414	0.727	0.852	1.56933e-05	3	Ncald
Trem2.2	2.02226e-08	-0.614568	0.318	0.628	4.04453e-05	3	Trem2
Lair1.2	2.79576e-08	-0.687346	0.705	0.891	5.59151e-05	3	Lair1
Bcan.2	5.22924e-08	-0.250068	0.136	0.399	0.000104585	3	Bcan
Serpini1.1	2.12314e-07	-0.262719	0.477	0.701	0.000424629	3	Serpini1
Rhoh.1	2.3599e-07	-0.269714	0.114	0.266	0.000471981	3	Rhoh
Wls	2.44382e-07	-0.258466	0.932	0.891	0.000488763	3	Wls
Frmd4b	3.47829e-07	0.255032	0.955	0.592	0.000695657	3	Frmd4b
Fcer1g	5.89935e-07	-0.515235	0.432	0.689	0.00117987	3	Fcer1g
Ptgds	7.26613e-07	0.560231	1	0.755	0.00145323	3	Ptgds
Olig1	8.78163e-07	0.269698	0.977	0.559	0.00175633	3	Olig1
Serpine2.1	1.48912e-06	-0.430715	0.182	0.417	0.00297824	3	Serpine2
Pcdh10	2.57964e-06	-0.266411	0.136	0.302	0.00515928	3	Pcdh10
Selplg.1	4.99853e-06	-0.75575	0.886	0.858	0.00999706	3	Selplg
Slc17a6	5.27303e-06	-0.290313	0.159	0.456	0.0105461	3	Slc17a6
Klf3	5.92625e-06	-0.300205	0.977	0.855	0.0118525	3	Klf3
Ogt	6.7243e-06	-0.576241	0.159	0.447	0.0134486	3	Ogt
Id4	7.86982e-06	-0.276625	0.614	0.734	0.0157396	3	Id4
Syt11.1	1.97367e-05	-0.381163	0.909	0.949	0.0394735	3	Syt11
Rpl18a	2.91676e-05	0.400665	0.977	0.912	0.0583352	3	Rpl18a
Syt1.1	4.06273e-05	-0.351314	0.886	0.94	0.0812547	3	Syt1
Cyth4.1	9.32495e-05	0.268468	1	0.816	0.186499	3	Cyth4
Bc1.1	0.00015652	0.613539	0.75	0.471	0.313039	3	Bc1
Pcdh7	0.000208706	-0.273066	0.068	0.29	0.417413	3	Pcdh7
Prdx6	0.00021921	-0.364418	0.045	0.308	0.43842	3	Prdx6
Rpl17	0.000251617	0.403511	0.886	0.761	0.503233	3	Rpl17
Slc4a4.1	0.000360799	-0.432335	0.114	0.329	0.721598	3	Slc4a4
Atp2b1.2	0.000691518	0.281919	1	0.813	1	3	Atp2b1
Ncf1.2	0.000761342	-0.480321	0.114	0.338	1	3	Ncf1
Fcgr3	0.000844064	-0.26796	1	0.918	1	3	Fcgr3
Ctsd.1	0.00203026	-0.444555	1	1	1	3	Ctsd
Lars2.1	0.00243359	-0.312457	1	0.855	1	3	Lars2
Camk2n1	0.00265475	0.321057	1	0.776	1	3	Camk2n1
Avp	0.00265494	0.449012	0.386	0.16	1	3	Avp
Gad2	0.00332055	-0.345065	0.705	0.659	1	3	Gad2
Rps24	0.00332188	0.34431	1	0.997	1	3	Rps24
Gm42418.1	0.003568	0.313948	1	1	1	3	Gm42418
Unc93b1.1	0.00432269	-0.271999	0.909	0.918	1	3	Unc93b1
Nap1l5.3	0.00471996	-0.269694	1	1	1	3	Nap1l5
Ncdn.2	0.00560596	-0.270799	0.295	0.426	1	3	Ncdn
AU020206	0.00574446	-0.283971	1	0.921	1	3	AU020206
mt-Nd4l	0.00732421	0.369189	1	0.988	1	3	mt-Nd4l
Hpgds.1	0.00735699	-0.341027	1	0.967	1	3	Hpgds
C1qa.1	0.00972555	-0.488129	0.614	0.804	1	3	C1qa
Baz1a	1.80765e-20	-0.298101	0.1	0.982	3.61529e-17	4	Baz1a
Nfe2l2	4.38993e-20	-0.250776	0.125	0.979	8.77987e-17	4	Nfe2l2
Ecel1.2	7.80425e-14	-0.250704	0.05	0.863	1.56085e-10	4	Ecel1
Plcb4	1.12836e-13	-0.299654	0.1	0.901	2.25672e-10	4	Plcb4
Pomc	1.20223e-13	-0.50275	0.1	0.907	2.40445e-10	4	Pomc
Chd7	2.47604e-13	-0.385187	0.15	0.937	4.95209e-10	4	Chd7
Rnf13	4.55299e-12	-0.272453	0.125	0.887	9.10598e-09	4	Rnf13
Dpp10.1	1.38299e-11	-0.259739	0.075	0.854	2.76599e-08	4	Dpp10
Slc12a2	1.19355e-10	-0.343342	0.05	0.818	2.38711e-07	4	Slc12a2
Syne1.3	5.35893e-09	-0.40836	0.1	0.836	1.07179e-05	4	Syne1
Ncald.1	6.20721e-09	-0.356656	0.2	0.913	1.24144e-05	4	Ncald
Gm2a	8.93936e-09	-0.299827	0.25	0.94	1.78787e-05	4	Gm2a
Cartpt.2	1.77743e-08	-0.516176	0.175	0.869	3.55486e-05	4	Cartpt
Gpx3	1.79447e-08	-0.373533	0.1	0.824	3.58894e-05	4	Gpx3
Pclo.1	5.38107e-08	-0.355803	0.2	0.887	0.000107621	4	Pclo
Rnase4	6.42971e-08	0.444411	0.275	0.287	0.000128594	4	Rnase4
Ptn.1	9.40343e-08	-0.434317	0.075	0.791	0.000188069	4	Ptn
Ncf1.3	1.03519e-07	0.526589	0.3	0.313	0.000207037	4	Ncf1
Tmem130.1	3.61381e-07	-0.47824	0.2	0.863	0.000722762	4	Tmem130
Tyrobp	4.73638e-07	0.268527	0.275	0.31	0.000947275	4	Tyrobp
Ppp1r9a	4.78593e-07	-0.392714	0.25	0.925	0.000957186	4	Ppp1r9a
Lyz2	6.33149e-07	0.33036	0.25	0.922	0.0012663	4	Lyz2
Ncam2	8.06773e-07	-0.261618	0.025	0.728	0.00161355	4	Ncam2
C230004F18Rik.1	1.34892e-06	-0.449791	0.125	0.794	0.00269784	4	C230004F18Rik
Tcf4	1.55868e-06	-0.41949	0.325	0.952	0.00311736	4	Tcf4
Ptprz1	1.83292e-06	-0.409474	0.1	0.782	0.00366584	4	Ptprz1
Serpine2.2	2.15038e-06	0.313062	0.4	0.388	0.00430075	4	Serpine2
Calb2.1	4.85235e-06	-0.432016	0.15	0.782	0.0097047	4	Calb2
Rgs2.1	6.03614e-06	-0.292078	0.325	0.943	0.0120723	4	Rgs2
Anxa3	9.56127e-06	0.340808	0.325	0.376	0.0191225	4	Anxa3
Dlk1.1	1.34348e-05	-0.305345	0.2	0.848	0.0268697	4	Dlk1
Maf.2	1.59896e-05	0.684756	0.6	0.588	0.0319792	4	Maf
Ctss	1.65219e-05	0.651788	0.85	0.946	0.0330439	4	Ctss
Trem2.3	1.74494e-05	0.571754	0.65	0.585	0.0348989	4	Trem2
Nrgn	1.92996e-05	-0.291458	0.125	0.758	0.0385991	4	Nrgn
Blnk	2.15766e-05	0.423342	0.25	0.373	0.0431532	4	Blnk
Ntm.1	2.39706e-05	-0.316809	0.175	0.782	0.0479413	4	Ntm
Aatk.1	2.64319e-05	-0.255245	0.025	0.251	0.0528639	4	Aatk
Itpkb	3.1143e-05	-0.26372	0.025	0.69	0.062286	4	Itpkb
Zbtb20	3.50306e-05	-0.445015	0.925	0.982	0.0700612	4	Zbtb20
Snhg11.2	6.32276e-05	-0.77537	1	0.988	0.126455	4	Snhg11
Acsl3	6.67475e-05	-0.327246	0.075	0.716	0.133495	4	Acsl3
Slc1a2	7.08316e-05	-0.492475	0.8	0.976	0.141663	4	Slc1a2
Nts.1	7.56958e-05	-0.266147	0.025	0.684	0.151392	4	Nts
Il16	8.15186e-05	0.260199	0.125	0.304	0.163037	4	Il16
Tmem119.1	9.9827e-05	0.346566	0.575	0.522	0.199654	4	Tmem119
Cd33	0.000141521	0.298078	0.275	0.373	0.283041	4	Cd33
Rps3a1.1	0.000151288	-0.466038	0.85	0.994	0.302575	4	Rps3a1
Gad2.1	0.000156298	-0.446474	0.1	0.731	0.312595	4	Gad2
Ogt.1	0.000171664	0.267978	0.325	0.424	0.343327	4	Ogt
Gnas.1	0.000175451	-0.437416	1	0.997	0.350902	4	Gnas
Pld4.2	0.00021594	0.384323	0.575	0.57	0.43188	4	Pld4
Glul.1	0.000275107	-0.540384	0.3	0.827	0.550214	4	Glul
Dock10	0.000277083	-0.265202	0.4	0.952	0.554167	4	Dock10
Msi2	0.000316798	-0.250273	0.125	0.737	0.633596	4	Msi2
Cyth4.2	0.000404117	0.520772	0.775	0.845	0.808235	4	Cyth4
Bsg.2	0.000443945	-0.314856	0.4	0.896	0.887891	4	Bsg
C1qa.2	0.000475742	0.430885	0.8	0.779	0.951483	4	C1qa
Atp2b1.3	0.000484172	-0.331989	0.375	0.89	0.968345	4	Atp2b1
Slc1a3.1	0.000604045	0.318985	0.45	0.487	1	4	Slc1a3
Pgrmc1.1	0.000829965	-0.317372	0.9	0.982	1	4	Pgrmc1
Inpp5d	0.000835165	-0.276274	0.45	0.976	1	4	Inpp5d
Ctsz	0.000851802	0.48488	0.575	0.594	1	4	Ctsz
Olig1.1	0.000917045	-0.269524	0.05	0.675	1	4	Olig1
Pcdh9.3	0.00100093	-0.252777	0.05	0.334	1	4	Pcdh9
Ncdn.3	0.00100753	0.30758	0.275	0.427	1	4	Ncdn
Rps23.1	0.00136635	0.392247	0.825	0.94	1	4	Rps23
C1qb.1	0.00154504	0.437341	0.95	1	1	4	C1qb
F11r	0.00184461	0.269726	0.225	0.409	1	4	F11r
Stmn1.1	0.00193429	-0.255589	0.4	0.89	1	4	Stmn1
Cadm1.1	0.00194668	-0.332494	0.275	0.815	1	4	Cadm1
Tubb3.1	0.0031582	-0.335768	0.025	0.633	1	4	Tubb3
Mt3.1	0.0035254	-0.27288	0.625	0.949	1	4	Mt3
Rrbp1	0.00418672	0.720524	0.7	0.86	1	4	Rrbp1
Grm5	0.00422584	-0.296911	0.075	0.34	1	4	Grm5
Rps19	0.0043748	0.461389	0.95	0.967	1	4	Rps19
Rpl32	0.00712778	0.450708	0.725	0.893	1	4	Rpl32
Slco2b1	0.00737095	0.346025	0.4	0.507	1	4	Slco2b1
Gm42418.2	0.00762273	0.291768	1	1	1	4	Gm42418
Rpl37.1	0.00908102	0.300852	1	0.979	1	4	Rpl37
