# Supplementary material for: Cell-specific transcriptome changes in the hypothalamic arcuate nucleus in a mouse deoxycorticosterone acetate-salt model of hypertension
Source: Front Cell Neurosci. 2023 May 24;17:1207350. doi: 10.3389/fncel.2023.1207350 (PMC10244568; doi:10.3389/fncel.2023.1207350)
Supplement: Supplementary file 4 [file Data_Sheet_4.xlsx]

## Sheet: Np_SC0 vs Np_SC2
Table S9 - Agrp Subcluster Pairwise Comparison DEGs
	p_val	avg_log2FC	Percent Expression in N_SC0	Percent Expression in N_SC2	p_val_adj	Cluster Enrichment
Agrp	9.10758e-146	-1.65166	0.748	0.972	1.82152e-142	Np_SC2
Npy	2.77255e-124	-1.62457	0.611	0.951	5.54511e-121	Np_SC2
Acvr1c	3.3856e-59	-0.74828	0.568	0.718	6.77119e-56	Np_SC2
Serpina3n	2.82762e-64	-0.738212	0.638	0.727	5.65525e-61	Np_SC2
Prune2	5.58756e-52	-0.671624	0.661	0.824	1.11751e-48	Np_SC2
Gm47283	6.02089e-23	-0.525891	0.956	0.96	1.20418e-19	Np_SC2
Pcdh9	4.9369e-28	-0.525136	0.539	0.722	9.8738e-25	Np_SC2
Irs4	6.93446e-33	-0.499707	0.674	0.756	1.38689e-29	Np_SC2
Srrm2	7.943e-30	-0.484673	0.92	0.941	1.5886e-26	Np_SC2
Plagl1	8.32957e-37	-0.445192	0.671	0.706	1.66591e-33	Np_SC2
Kcnk9	2.85662e-41	-0.400805	0.697	0.653	5.71323e-38	Np_SC2
Zfhx3	3.5236e-15	-0.344404	0.583	0.695	7.04719e-12	Np_SC2
Atp1a1	5.11571e-22	-0.335347	0.811	0.79	1.02314e-18	Np_SC2
Rasgrp1	5.87102e-53	-0.328004	0.586	0.483	1.1742e-49	Np_SC2
Pcsk1n	6.95902e-15	-0.318988	1	1	1.3918e-11	Np_SC2
Kcnq1ot1	7.12875e-16	-0.314217	0.976	0.951	1.42575e-12	Np_SC2
Pgr15l	3.45312e-25	-0.310349	0.389	0.43	6.90624e-22	Np_SC2
Unc5d	5.49221e-24	-0.306568	0.704	0.697	1.09844e-20	Np_SC2
Kcnk2	1.00974e-23	-0.305791	0.591	0.612	2.01948e-20	Np_SC2
Arhgap6	8.11334e-27	-0.300714	0.66	0.646	1.62267e-23	Np_SC2
Arhgap36	1.71438e-10	-0.286593	0.379	0.504	3.42876e-07	Np_SC2
Cited1	1.62177e-18	-0.286477	0.695	0.661	3.24354e-15	Np_SC2
Npy2r	1.01326e-20	-0.273134	0.368	0.426	2.02651e-17	Np_SC2
Rpl9	3.01445e-11	-0.266335	0.959	0.958	6.0289e-08	Np_SC2
Rgs2	9.90235e-18	-0.259926	0.55	0.551	1.98047e-14	Np_SC2
Pnisr	2.19242e-17	-0.258988	0.77	0.741	4.38485e-14	Np_SC2
Ncam2	2.83489e-24	-0.258778	0.471	0.436	5.66977e-21	Np_SC2
Dst	3.37662e-14	-0.254295	0.884	0.86	6.75323e-11	Np_SC2
Csgalnact1	2.88428e-20	-0.252231	0.453	0.441	5.76857e-17	Np_SC2
Sorbs2	7.30997e-20	-0.248504	0.466	0.46	1.46199e-16	Np_SC2
Dmd	7.3478e-20	-0.247636	0.739	0.68	1.46956e-16	Np_SC2
Scn9a	3.13814e-27	-0.245714	0.655	0.6	6.27629e-24	Np_SC2
Auts2	3.41394e-20	-0.239331	0.64	0.606	6.82787e-17	Np_SC2
Rmst	1.50767e-10	-0.23334	0.467	0.475	3.01534e-07	Np_SC2
Deptor	3.02218e-09	-0.22316	0.223	0.314	6.04437e-06	Np_SC2
Corin	2.2032e-50	-0.216233	0.546	0.362	4.40639e-47	Np_SC2
Rps12	1.15782e-09	-0.213935	0.749	0.742	2.31563e-06	Np_SC2
Gm45159	9.16793e-12	-0.207659	0.45	0.432	1.83359e-08	Np_SC2
Pitpnc1	9.11399e-31	-0.205529	0.63	0.517	1.8228e-27	Np_SC2
Dgkb	9.43911e-07	-0.204219	0.513	0.551	0.00188782	Np_SC2
C230004F18Rik	2.1354e-13	-0.192115	0.687	0.631	4.27081e-10
Rpl8	2.15988e-07	-0.190106	0.922	0.909	0.000431975
Hs6st2	7.87795e-06	-0.184047	0.463	0.513	0.0157559
Gpr179	9.47054e-37	-0.182835	0.402	0.292	1.89411e-33
Peg3	1.29387e-06	-0.181302	0.979	0.975	0.00258775
Pcp4	4.66824e-11	-0.175122	0.708	0.665	9.33648e-08
AC149090.1	3.38625e-09	-0.172065	0.899	0.852	6.7725e-06
Prox1	7.0998e-47	-0.166919	0.448	0.295	1.41996e-43
Tmem176b	4.86001e-13	-0.166202	0.301	0.322	9.72001e-10
Dgkk	1.17227e-35	-0.164724	0.464	0.335	2.34454e-32
Ptprk	2.08961e-19	-0.163822	0.625	0.527	4.17922e-16
Rpl32	7.95957e-12	-0.16299	0.814	0.75	1.59191e-08
Malat1	5.50211e-06	-0.160312	1	1	0.0110042
Tcf4	7.18594e-16	-0.158724	0.645	0.564	1.43719e-12
B2m	9.01623e-08	-0.155463	0.417	0.402	0.000180325
Pou2f2	3.45758e-23	-0.152321	0.5	0.394	6.91516e-20
Rpl14	9.2863e-08	-0.15214	0.876	0.837	0.000185726
Enpp2	2.40583e-10	-0.149567	0.446	0.381	4.81166e-07
Pcdh17	2.33256e-08	-0.149559	0.744	0.703	4.66512e-05
Gabre	1.30295e-34	-0.145145	0.511	0.369	2.60591e-31
Rpl26	3.61978e-08	-0.143757	0.803	0.758	7.23956e-05
Rps27a	7.77417e-05	-0.143007	0.946	0.934	0.155483
Syne2	1.16131e-22	-0.137945	0.419	0.299	2.32262e-19
Hcn1	0.000216063	-0.136102	0.265	0.297	0.432126
H2-D1	8.56313e-13	-0.135378	0.539	0.462	1.71263e-09
Msi2	1.31306e-11	-0.134977	0.694	0.65	2.62612e-08
Car10	6.96084e-23	-0.133768	0.52	0.411	1.39217e-19
Rps3a1	6.80347e-07	-0.133439	0.821	0.788	0.00136069
Tgfbi	3.81315e-33	-0.131394	0.523	0.316	7.6263e-30
Rps11	2.79178e-08	-0.130069	0.862	0.807	5.58357e-05
Krt90	1.43873e-14	-0.128951	0.321	0.25	2.87745e-11
Gabrq	2.93385e-18	-0.12634	0.419	0.354	5.8677e-15
Lsamp	1.64303e-11	-0.124646	0.788	0.72	3.28606e-08
Gm42418	0.000489659	-0.124382	0.998	1	0.979319
Gad2	2.72975e-08	-0.119606	0.708	0.653	5.45949e-05
Rpl17	2.39146e-05	-0.117322	0.718	0.693	0.0478293
Rreb1	1.55944e-44	-0.117279	0.542	0.331	3.11887e-41
Kcnq3	2.56715e-14	-0.116961	0.505	0.405	5.1343e-11
Rps28	1.02483e-06	-0.116905	0.767	0.727	0.00204966
Syne1	7.56643e-17	-0.116093	0.756	0.644	1.51329e-13
Rpl3	0.00186989	-0.1114	0.901	0.883	1
B3gat2	1.47593e-05	-0.111339	0.257	0.271	0.0295186
Slc12a7	5.95144e-21	-0.108533	0.422	0.269	1.19029e-17
Tead1	8.63822e-08	-0.108415	0.357	0.35	0.000172764
Hsp90aa1	0.00200233	-0.108367	0.985	0.972	1
Satb1	5.84792e-12	-0.106424	0.435	0.341	1.16958e-08
Rps27	1.93871e-07	-0.104075	0.904	0.854	0.000387743
mt-Atp8	1.26318e-15	0.100024	0.531	0.312	2.52635e-12
Htra1	1.12449e-09	0.100721	0.265	0.127	2.24898e-06
Asrgl1	3.39048e-28	0.101143	0.476	0.223	6.78097e-25
Prdx6	1.72599e-33	0.101315	0.609	0.307	3.45198e-30
Chchd10	6.80398e-08	0.101474	0.559	0.403	0.00013608
5031439G07Rik	2.58238e-14	0.102056	0.651	0.426	5.16476e-11
Isl1	4.23067e-17	0.103411	0.72	0.494	8.46133e-14
Otof	2.6739e-26	0.10346	0.454	0.161	5.3478e-23
Paqr8	3.67569e-16	0.103776	0.497	0.256	7.35139e-13
Htr2c	6.05022e-21	0.103984	0.406	0.152	1.21004e-17
Six6	2.41369e-14	0.104022	0.35	0.165	4.82738e-11
Plxdc2	3.1102e-54	0.104339	0.438	0.076	6.22039e-51
Hepacam	2.68573e-17	0.104696	0.272	0.08	5.37147e-14
Syt11	1.05641e-05	0.10488	0.977	0.917	0.0211282
Luzp2	1.49861e-08	0.10815	0.316	0.169	2.99723e-05
Phldb1	1.87942e-25	0.108197	0.36	0.123	3.75885e-22
Maged1	0.000394748	0.109112	0.984	0.953	0.789496
Nrxn3	1.09855e-11	0.109761	0.818	0.65	2.19709e-08
Tubb3	5.13633e-05	0.1111	0.679	0.551	0.102727
Etv1	9.95881e-12	0.111507	0.396	0.225	1.99176e-08
Itgb8	3.93142e-22	0.111511	0.409	0.148	7.86284e-19
Mpp6	4.81291e-17	0.112085	0.492	0.246	9.62581e-14
Kcnj10	9.49618e-18	0.112897	0.37	0.169	1.89924e-14
Esr1	2.01366e-36	0.113023	0.362	0.072	4.02731e-33
Dock10	2.6719e-46	0.113373	0.489	0.142	5.34381e-43
mt-Nd5	9.52129e-06	0.115297	0.906	0.807	0.0190426
Lbhd2	1.02053e-08	0.115908	0.267	0.136	2.04105e-05
Sphkap	4.36144e-09	0.116977	0.306	0.172	8.72288e-06
Itm2a	2.12758e-15	0.117523	0.388	0.178	4.25515e-12
Sox4	4.48907e-51	0.117653	0.536	0.152	8.97814e-48
Lamp5	3.93969e-70	0.117853	0.583	0.106	7.87938e-67
Gal	2.43974e-06	0.117859	0.256	0.136	0.00487948
Cxcl14	3.43281e-15	0.118151	0.428	0.214	6.86562e-12
Sfxn5	3.44092e-28	0.119119	0.365	0.112	6.88183e-25
S100b	1.71093e-29	0.120146	0.371	0.114	3.42186e-26
Nfix	9.84562e-25	0.12046	0.371	0.117	1.96912e-21
Crabp1	6.59314e-16	0.12265	0.362	0.148	1.31863e-12
Adgrg1	5.05544e-19	0.122753	0.51	0.263	1.01109e-15
Kctd12	4.36493e-17	0.122853	0.446	0.206	8.72986e-14
Bin1	1.59645e-12	0.124753	0.752	0.561	3.19289e-09
C130073E24Rik	9.23776e-06	0.125548	0.42	0.305	0.0184755
Ptch1	1.14071e-20	0.125573	0.394	0.167	2.28142e-17
Gstm1	1.07909e-12	0.125751	0.379	0.205	2.15818e-09
Hspa8	2.2897e-06	0.126181	0.985	0.938	0.00457941
Ttc3	6.77469e-05	0.127914	0.995	0.996	0.135494
Celf4	6.74408e-05	0.128416	0.951	0.883	0.134882
Rbfox1	1.85944e-20	0.130034	0.393	0.15	3.71888e-17
Fstl5	1.8532e-11	0.130196	0.306	0.134	3.7064e-08
Wscd1	1.38888e-32	0.130452	0.36	0.076	2.77776e-29
Slc17a6	9.91946e-09	0.134433	0.379	0.216	1.98389e-05
Hap1	0.00103053	0.134932	0.979	0.962	1
Tmem130	5.7227e-09	0.135	0.894	0.758	1.14454e-05
Tacr1	5.59655e-15	0.13616	0.381	0.229	1.11931e-11
Lgi3	4.83125e-20	0.137931	0.342	0.123	9.6625e-17
Sema5a	3.76761e-34	0.138073	0.546	0.21	7.53522e-31
Fat3	2.70882e-25	0.1383	0.445	0.163	5.41763e-22
Pla2g7	3.41777e-19	0.13854	0.322	0.108	6.83553e-16
Fgfr3	3.00374e-49	0.13924	0.464	0.087	6.00748e-46
Nfia	2.06636e-08	0.140515	0.261	0.129	4.13273e-05
Sv2c	7.00906e-14	0.142227	0.656	0.428	1.40181e-10
Gabrb1	3.80689e-16	0.143918	0.765	0.545	7.61379e-13
Gm2a	1.41811e-45	0.144649	0.448	0.098	2.83621e-42
Cspg5	9.48782e-10	0.144894	0.689	0.513	1.89756e-06
Rorb	8.03404e-14	0.145803	0.301	0.121	1.60681e-10
Ncdn	1.3039e-10	0.147744	0.52	0.333	2.6078e-07
Slc4a4	3.80897e-06	0.147837	0.394	0.256	0.00761793
Qk	7.63854e-09	0.148297	0.422	0.256	1.52771e-05
Igf1r	6.60698e-15	0.148472	0.381	0.169	1.3214e-11
Slc32a1	1.34327e-13	0.149171	0.601	0.388	2.68653e-10
Nrp2	8.86158e-14	0.149564	0.417	0.206	1.77232e-10
Grk3	9.06876e-39	0.150044	0.64	0.303	1.81375e-35
Nfib	3.34008e-12	0.150101	0.319	0.153	6.68016e-09
Grin3a	1.09226e-20	0.150378	0.363	0.123	2.18451e-17
Gja1	9.24192e-38	0.150884	0.373	0.078	1.84838e-34
Ramp1	1.24164e-31	0.15117	0.498	0.17	2.48328e-28
Lmo3	6.92151e-21	0.151376	0.45	0.186	1.3843e-17
Cadm1	2.34554e-08	0.151823	0.829	0.68	4.69109e-05
Cnp	1.21839e-28	0.152479	0.371	0.102	2.43677e-25
Cplx2	3.04908e-24	0.153728	0.65	0.375	6.09816e-21
Id4	1.98826e-08	0.154101	0.505	0.347	3.97651e-05
Rgs10	5.01642e-15	0.154212	0.34	0.144	1.00328e-11
Gad1	0.000115147	0.154862	0.607	0.487	0.230294
Mt2	1.89625e-19	0.155895	0.402	0.165	3.79251e-16
Zdbf2	1.59003e-15	0.156929	0.822	0.617	3.18006e-12
Ywhag	6.1049e-10	0.157035	0.907	0.767	1.22098e-06
Ddhd1	5.18922e-35	0.157385	0.49	0.189	1.03784e-31
Plxnb1	3.78447e-48	0.158463	0.497	0.136	7.56893e-45
Camkv	2.59977e-09	0.158702	0.63	0.445	5.19953e-06
Rtn1	9.00852e-06	0.163854	0.977	0.951	0.018017
Scd2	9.67404e-13	0.16403	0.779	0.581	1.93481e-09
Gabra1	1.06959e-13	0.164586	0.415	0.205	2.13918e-10
Aldoc	5.54883e-09	0.16599	0.583	0.403	1.10977e-05
Aatk	1.68442e-15	0.16612	0.671	0.443	3.36885e-12
Slc24a2	3.36426e-36	0.166902	0.484	0.157	6.72852e-33
Spon1	8.45366e-23	0.166962	0.438	0.182	1.69073e-19
Mmd2	1.16334e-33	0.168257	0.407	0.114	2.32668e-30
Aplp1	1.89624e-09	0.169324	0.857	0.703	3.79249e-06
Cacna2d1	7.51438e-12	0.170244	0.521	0.324	1.50288e-08
Pbxip1	4.17431e-24	0.170838	0.409	0.155	8.34861e-21
Greb1	3.33606e-55	0.171725	0.565	0.129	6.67212e-52
Calm2	4.75921e-07	0.172538	0.963	0.902	0.000951842
Ahi1	2.45654e-05	0.175154	0.99	0.975	0.0491309
Tmem47	7.34956e-15	0.175825	0.443	0.222	1.46991e-11
Pde1a	1.88551e-24	0.176531	0.482	0.197	3.77103e-21
Nell1	4.39353e-17	0.177048	0.507	0.278	8.78706e-14
Fam107a	6.92168e-37	0.177759	0.687	0.335	1.38434e-33
Gnas	3.50794e-08	0.177825	0.997	0.998	7.01588e-05
Ppp3ca	8.81214e-11	0.178863	0.818	0.64	1.76243e-07
Camk2n1	2.24599e-07	0.179313	0.642	0.479	0.000449198
Cpe	5.0468e-11	0.179649	0.886	0.727	1.00936e-07
Tubb2b	1.06896e-14	0.180265	0.524	0.297	2.13792e-11
Cpne7	5.12181e-23	0.182215	0.572	0.28	1.02436e-19
Grm5	2.57922e-08	0.182748	0.43	0.295	5.15845e-05
Pcdh7	2.56652e-12	0.183029	0.875	0.701	5.13304e-09
Tmem35a	2.17128e-14	0.183648	0.417	0.21	4.34256e-11
Ptma	8.16588e-16	0.186636	0.808	0.587	1.63318e-12
Dlk1	7.1986e-06	0.190273	0.922	0.828	0.0143972
Gpr37l1	5.40211e-12	0.191187	0.383	0.248	1.08042e-08
Aqp4	6.62902e-43	0.191332	0.412	0.076	1.3258e-39
Pde10a	1.478e-30	0.192988	0.588	0.258	2.956e-27
Pcsk2	1.24584e-20	0.195178	0.634	0.366	2.49169e-17
Dpy19l1	1.98547e-23	0.195289	0.56	0.265	3.97094e-20
Col11a1	3.38485e-15	0.195589	0.383	0.244	6.76971e-12
Col25a1	4.2848e-29	0.197371	0.513	0.193	8.5696e-26
Tmsb10	1.87349e-09	0.197808	0.777	0.604	3.74698e-06
Nap1l5	5.43823e-10	0.197901	0.998	0.979	1.08765e-06
Impact	2.22421e-08	0.198005	0.909	0.794	4.44843e-05
Cd81	3.88414e-12	0.201155	0.787	0.589	7.76827e-09	Np_SC0
Mobp	4.15099e-09	0.201266	0.318	0.161	8.30199e-06	Np_SC0
Ly6h	4.17652e-09	0.202419	0.997	0.973	8.35304e-06	Np_SC0
Cadps2	7.05636e-40	0.204137	0.594	0.225	1.41127e-36	Np_SC0
Pgrmc1	2.97053e-08	0.204287	0.961	0.886	5.94105e-05	Np_SC0
Dbi	4.92073e-10	0.210162	0.436	0.254	9.84146e-07	Np_SC0
Thy1	2.52551e-12	0.21037	0.559	0.347	5.05102e-09	Np_SC0
Ntsr2	1.84876e-15	0.210806	0.285	0.098	3.69753e-12	Np_SC0
Gaa	1.51348e-07	0.211337	0.961	0.896	0.000302696	Np_SC0
Foxn3	1.95364e-33	0.211944	0.493	0.178	3.90727e-30	Np_SC0
Slc6a1	7.91983e-12	0.212142	0.448	0.248	1.58397e-08	Np_SC0
Plpp3	6.66691e-28	0.213316	0.417	0.136	1.33338e-24	Np_SC0
Clmn	1.05842e-45	0.214249	0.603	0.222	2.11685e-42	Np_SC0
Six3	4.75023e-30	0.215938	0.502	0.195	9.50047e-27	Np_SC0
Ubb	1.34043e-07	0.21657	0.971	0.924	0.000268085	Np_SC0
Calm1	1.34001e-10	0.220901	0.985	0.96	2.68002e-07	Np_SC0
Atp2b4	3.63037e-29	0.224175	0.521	0.214	7.26073e-26	Np_SC0
Ghrh	4.49634e-08	0.225576	0.311	0.17	8.99269e-05	Np_SC0
Celf2	5.29641e-15	0.225814	0.621	0.384	1.05928e-11	Np_SC0
Lrp1b	3.46422e-23	0.227446	0.433	0.161	6.92845e-20	Np_SC0
Ildr2	3.65829e-30	0.228334	0.694	0.366	7.31658e-27	Np_SC0
Acsl3	1.36054e-29	0.231002	0.526	0.222	2.72108e-26	Np_SC0
Marcks	4.55019e-16	0.234024	0.783	0.551	9.10037e-13	Np_SC0
Rbms3	1.5198e-31	0.234318	0.663	0.333	3.03959e-28	Np_SC0
mt-Co1	7.33828e-09	0.234904	1	1	1.46766e-05	Np_SC0
Dpp10	2.44997e-15	0.236359	0.632	0.392	4.89993e-12	Np_SC0
Gabrg1	1.45598e-29	0.236489	0.663	0.341	2.91196e-26	Np_SC0
Vsnl1	1.68456e-18	0.237356	0.49	0.237	3.36913e-15	Np_SC0
Fth1	1.54513e-06	0.237571	0.91	0.828	0.00309026	Np_SC0
6330403K07Rik	6.82575e-09	0.240987	0.948	0.886	1.36515e-05	Np_SC0
Fam46a	1.79682e-23	0.2424	0.52	0.241	3.59363e-20	Np_SC0
mt-Nd1	2.67155e-06	0.242466	0.984	0.977	0.0053431	Np_SC0
Mbp	7.15726e-08	0.24259	0.497	0.33	0.000143145	Np_SC0
Tubb4a	4.6685e-10	0.243433	0.547	0.358	9.33701e-07	Np_SC0
Prlr	4.74112e-46	0.243476	0.534	0.159	9.48224e-43	Np_SC0
Mt1	1.90064e-10	0.245419	0.505	0.314	3.80128e-07	Np_SC0
Asb4	3.29984e-16	0.245749	0.757	0.523	6.59967e-13	Np_SC0
Gap43	1.94838e-14	0.252885	0.765	0.544	3.89676e-11	Np_SC0
Dner	9.34441e-13	0.254743	0.593	0.373	1.86888e-09	Np_SC0
Mt3	8.92382e-18	0.257694	0.782	0.536	1.78476e-14	Np_SC0
Ecel1	1.53375e-18	0.260983	0.679	0.417	3.0675e-15	Np_SC0
Ttyh1	2.4355e-41	0.262885	0.599	0.223	4.87099e-38	Np_SC0
Ptgds	1.24143e-20	0.265426	0.565	0.286	2.48286e-17	Np_SC0
Atp1b1	2.73244e-15	0.267472	0.997	0.958	5.46488e-12	Np_SC0
Rab3c	1.83334e-13	0.26771	0.927	0.777	3.66668e-10	Np_SC0
Hpcal1	3.81307e-17	0.268335	0.393	0.195	7.62615e-14	Np_SC0
Gapdh	3.06097e-12	0.269685	0.946	0.864	6.12195e-09	Np_SC0
Gm3764	2.08003e-16	0.27283	0.352	0.157	4.16006e-13	Np_SC0
Syn2	9.60443e-14	0.274756	0.731	0.517	1.92089e-10	Np_SC0
Pde4b	2.15656e-29	0.275439	0.484	0.172	4.31312e-26	Np_SC0
Serpine2	9.37313e-23	0.275528	0.37	0.117	1.87463e-19	Np_SC0
Prkacb	2.4143e-14	0.279737	0.936	0.803	4.82861e-11	Np_SC0
Unc13c	1.18717e-59	0.27984	0.438	0.044	2.37435e-56	Np_SC0
Slc1a3	1.16668e-28	0.281788	0.542	0.227	2.33336e-25	Np_SC0
Sparcl1	1.7592e-15	0.284472	0.611	0.367	3.5184e-12	Np_SC0
Brinp3	2.49558e-79	0.286535	0.565	0.07	4.99115e-76	Np_SC0
Bex2	8.78457e-13	0.288229	0.964	0.896	1.75691e-09	Np_SC0
Bcan	5.67354e-34	0.291745	0.443	0.119	1.13471e-30	Np_SC0
Psap	1.39439e-15	0.292199	0.972	0.877	2.78878e-12	Np_SC0
mt-Nd2	1.57696e-13	0.294879	0.997	0.985	3.15391e-10	Np_SC0
2900097C17Rik	4.74135e-13	0.294958	0.883	0.741	9.4827e-10	Np_SC0
Glul	1.57822e-16	0.295515	0.541	0.294	3.15643e-13	Np_SC0
Slc6a11	1.20901e-19	0.298029	0.484	0.222	2.41802e-16	Np_SC0
Calb1	8.26072e-22	0.30411	0.485	0.21	1.65214e-18	Np_SC0
Tac2	7.20903e-18	0.304493	0.256	0.068	1.44181e-14	Np_SC0
Ncam1	3.31036e-17	0.307544	0.974	0.858	6.62072e-14	Np_SC0
Alcam	2.09874e-26	0.31415	0.585	0.271	4.19747e-23	Np_SC0
Ptprz1	2.27459e-25	0.315693	0.801	0.506	4.54918e-22	Np_SC0
Clu	2.88992e-15	0.317064	0.761	0.542	5.77985e-12	Np_SC0
Cadm2	1.4131e-22	0.317643	0.45	0.176	2.82621e-19	Np_SC0
Atp1b2	1.07132e-45	0.320082	0.507	0.123	2.14264e-42	Np_SC0
Ndrg2	5.14013e-17	0.320099	0.676	0.424	1.02803e-13	Np_SC0
Snap25	9.96055e-13	0.327246	0.862	0.727	1.99211e-09	Np_SC0
Pcdh11x	4.69192e-39	0.338537	0.521	0.165	9.38384e-36	Np_SC0
Ptprt	4.38638e-45	0.338605	0.643	0.229	8.77276e-42	Np_SC0
Itm2c	2.64656e-16	0.347197	0.941	0.835	5.29312e-13	Np_SC0
Tubb2a	3.1056e-20	0.347452	0.889	0.676	6.21119e-17	Np_SC0
Pcdh10	1.5112e-41	0.367797	0.625	0.231	3.02241e-38	Np_SC0
Pnoc	2.69078e-36	0.368048	0.544	0.199	5.38155e-33	Np_SC0
Parm1	1.4713e-53	0.369069	0.637	0.199	2.9426e-50	Np_SC0
Ckb	1.28295e-17	0.369199	0.886	0.716	2.56591e-14	Np_SC0
Sparc	3.99076e-20	0.375585	0.73	0.462	7.98152e-17	Np_SC0
Cst3	5.47322e-11	0.384515	0.943	0.89	1.09464e-07	Np_SC0
Gda	6.15261e-35	0.384721	0.567	0.208	1.23052e-31	Np_SC0
Ntm	5.60703e-26	0.384775	0.629	0.312	1.12141e-22	Np_SC0
Edil3	1.90915e-35	0.384928	0.66	0.303	3.8183e-32	Np_SC0
Vgf	3.08456e-14	0.388284	0.425	0.212	6.16911e-11	Np_SC0
Serpini1	6.92386e-64	0.388454	0.697	0.22	1.38477e-60	Np_SC0
Tuba1a	1.36611e-20	0.3905	0.863	0.653	2.73221e-17	Np_SC0
Atp2b1	1.24742e-26	0.399378	0.826	0.53	2.49485e-23	Np_SC0
Calb2	2.51519e-24	0.408951	0.622	0.335	5.03038e-21	Np_SC0
Agt	6.92147e-29	0.409418	0.42	0.127	1.38429e-25	Np_SC0
Itih3	6.86921e-50	0.409937	0.52	0.117	1.37384e-46	Np_SC0
Cartpt	1.21515e-30	0.41332	0.638	0.305	2.43029e-27	Np_SC0
Ncald	7.63801e-23	0.417007	0.748	0.472	1.5276e-19	Np_SC0
Pcdh19	4.25772e-51	0.42264	0.625	0.189	8.51544e-48	Np_SC0
Scg2	5.92555e-21	0.430872	0.946	0.797	1.18511e-17	Np_SC0
Opcml	2.56686e-40	0.433394	0.624	0.241	5.13372e-37	Np_SC0
Nrgn	1.55291e-38	0.446385	0.578	0.205	3.10581e-35	Np_SC0
Rnf128	8.58177e-60	0.448685	0.695	0.229	1.71635e-56	Np_SC0
Nnat	6.47347e-23	0.452305	0.762	0.487	1.29469e-19	Np_SC0
App	2.2834e-30	0.465445	0.969	0.884	4.5668e-27	Np_SC0
Tenm1	1.74462e-60	0.485985	0.568	0.116	3.48924e-57	Np_SC0
Chgb	1.4415e-34	0.487722	0.728	0.369	2.883e-31	Np_SC0
Gria3	1.95209e-35	0.488747	0.715	0.386	3.90418e-32	Np_SC0
Atp1a2	3.07187e-20	0.528489	0.593	0.345	6.14374e-17	Np_SC0
Slc1a2	5.8651e-22	0.556899	0.741	0.494	1.17302e-18	Np_SC0
Plp1	9.56183e-09	0.570277	0.433	0.299	1.91237e-05	Np_SC0
Meg3	1.61274e-48	0.59757	1	1	3.22548e-45	Np_SC0
Pomc	4.22585e-19	0.602701	0.49	0.235	8.4517e-16	Np_SC0
Apoe	3.47559e-23	0.606959	0.769	0.519	6.95117e-20	Np_SC0
Syt1	6.16538e-41	0.646673	0.85	0.509	1.23308e-37	Np_SC0
Gpr101	1.47111e-78	0.852404	0.713	0.233	2.94223e-75	Np_SC0
Sst	7.04414e-96	2.56429	0.842	0.432	1.40883e-92	Np_SC0

## Sheet: Np_SC0 vs Np_SC9
	p_val	avg_log2FC	Percent Expression in N_SC0	Percent Expression in N_SC9	p_val_adj	Cluster Enrichment
Gm42418	4.36278e-48	-1.03663	0.998	1	8.72556e-45	Np_SC9
Npy	1.69965e-15	-0.923816	0.611	0.804	3.3993e-12	Np_SC9
Agrp	4.22188e-19	-0.898203	0.748	0.872	8.44375e-16	Np_SC9
mt-Co1	9.12943e-35	-0.6503	1	1	1.82589e-31	Np_SC9
mt-Nd3	1.58549e-16	-0.570622	0.761	0.892	3.17099e-13	Np_SC9
Rpl36	3.2652e-15	-0.563793	0.845	0.946	6.5304e-12	Np_SC9
Serpina3n	8.7719e-10	-0.521101	0.638	0.628	1.75438e-06	Np_SC9
Rps27a	2.53701e-14	-0.520399	0.946	1	5.07402e-11	Np_SC9
Rpl3	2.98959e-13	-0.514387	0.901	0.986	5.97917e-10	Np_SC9
Rpl37a	6.83186e-13	-0.500386	0.951	0.986	1.36637e-09	Np_SC9
Rps12	4.14029e-12	-0.49788	0.749	0.824	8.28058e-09	Np_SC9
Rpl23	3.87178e-11	-0.490767	0.956	0.993	7.74356e-08	Np_SC9
Eef1a1	1.30881e-16	-0.482607	0.995	1	2.61761e-13	Np_SC9
Rpl9	1.23351e-11	-0.476108	0.959	1	2.46701e-08	Np_SC9
Rpl27a	3.18793e-13	-0.470768	0.889	0.993	6.37586e-10	Np_SC9
Rps29	5.98489e-12	-0.442869	0.917	0.986	1.19698e-08	Np_SC9
Rpl21	1.58647e-10	-0.442323	0.964	1	3.17293e-07	Np_SC9
mt-Nd5	3.56327e-11	-0.430828	0.906	0.993	7.12655e-08	Np_SC9
Rpl26	5.55806e-09	-0.429288	0.803	0.872	1.11161e-05	Np_SC9
Rps10	7.95458e-10	-0.429159	0.836	0.885	1.59092e-06	Np_SC9
Rps14	5.10706e-11	-0.426341	0.876	0.919	1.02141e-07	Np_SC9
Rps24	5.00586e-11	-0.423487	0.976	1	1.00117e-07	Np_SC9
Rpl38	1.76341e-09	-0.422099	0.943	0.986	3.52683e-06	Np_SC9
Rps20	3.39348e-07	-0.421017	0.863	0.926	0.000678696	Np_SC9
Rps28	1.80928e-09	-0.413068	0.767	0.784	3.61856e-06	Np_SC9
Rpl32	3.79039e-08	-0.411703	0.814	0.872	7.58077e-05	Np_SC9
Rps8	8.34218e-09	-0.409609	0.959	1	1.66844e-05	Np_SC9
Tmsb4x	3.49721e-10	-0.406603	0.948	0.993	6.99443e-07	Np_SC9
Rps21	3.362e-09	-0.403818	0.922	0.98	6.724e-06	Np_SC9
Rpl24	2.30996e-08	-0.397472	0.907	0.959	4.61992e-05	Np_SC9
Rps3a1	1.50079e-06	-0.377743	0.821	0.892	0.00300158	Np_SC9
Pfdn5	1.54694e-09	-0.375817	0.748	0.777	3.09388e-06	Np_SC9
Rpl19	9.15201e-07	-0.37294	0.953	0.986	0.0018304	Np_SC9
Rpl8	4.75612e-08	-0.364775	0.922	0.986	9.51224e-05	Np_SC9
mt-Nd4l	3.0095e-08	-0.358686	0.891	0.986	6.01901e-05	Np_SC9
Rps23	2.4462e-07	-0.357308	0.842	0.919	0.000489241	Np_SC9
Rpl13	4.69967e-08	-0.356561	0.98	1	9.39934e-05	Np_SC9
Rps11	3.21453e-07	-0.35427	0.862	0.912	0.000642906	Np_SC9
Fau	8.78218e-07	-0.348211	0.972	0.986	0.00175644	Np_SC9
Ppia	1.33835e-06	-0.347098	0.954	0.98	0.0026767	Np_SC9
Mt3	1.8156e-05	-0.344476	0.782	0.818	0.036312	Np_SC9
Lars2	1.01828e-08	-0.340703	0.676	0.649	2.03657e-05	Np_SC9
Nnat	1.43194e-05	-0.333442	0.762	0.885	0.0286387	Np_SC9
Rps19	8.26356e-07	-0.33333	0.901	0.98	0.00165271	Np_SC9
Rplp1	1.87176e-06	-0.326443	0.966	1	0.00374352	Np_SC9
Rpsa	1.72394e-05	-0.32419	0.95	0.993	0.0344788	Np_SC9
Rpl41	9.76882e-06	-0.317158	0.972	0.986	0.0195376	Np_SC9
Rpl37	1.03958e-05	-0.306465	0.958	1	0.0207917	Np_SC9
Rps27	0.0005684	-0.299178	0.904	0.919	1
Rpl34	6.13415e-07	-0.298652	0.717	0.689	0.00122683	Np_SC9
mt-Nd2	8.3616e-06	-0.289734	0.997	1	0.0167232	Np_SC9
Rpl18a	9.7736e-05	-0.287623	0.857	0.892	0.195472
Rgs2	2.20934e-08	-0.267536	0.55	0.486	4.41867e-05	Np_SC9
Cited1	4.51058e-05	-0.267256	0.695	0.635	0.0902116
Rpl10	3.58109e-12	-0.262929	0.751	0.642	7.16218e-09	Np_SC9
Rpl17	1.19602e-07	-0.261516	0.718	0.676	0.000239204	Np_SC9
Rpl14	0.00126088	-0.257416	0.876	0.939	1
Rpl11	0.00201926	-0.256615	0.941	0.98	1
Rpl30	0.000633225	-0.255722	0.888	0.959	1
Irs4	0.000514302	-0.253433	0.674	0.615	1
Tpt1	2.78182e-05	-0.240649	0.708	0.689	0.0556363
Tac2	0.000128346	-0.224985	0.256	0.176	0.256691
Cst3	0.000106771	-0.213127	0.943	0.993	0.213542
Tmsb10	1.38442e-14	-0.20788	0.777	0.608	2.76883e-11	Np_SC9
mt-Nd1	0.000254622	-0.206391	0.984	1	0.509245
Fth1	0.00175203	-0.203381	0.91	0.973	1
Mt1	0.000631697	-0.199002	0.505	0.493	1
Rpl35a	0.0131192	-0.198305	0.964	0.993	1
Npy2r	0.262476	-0.18861	0.368	0.412	1
Acvr1c	0.00654245	-0.180518	0.568	0.52	1
Ghrh	1.05519e-07	-0.17716	0.311	0.135	0.000211039
Map1b	0.0429944	-0.173517	0.971	0.993	1
Basp1	0.0503129	-0.17296	0.832	0.845	1
Chchd10	0.305084	-0.166971	0.559	0.561	1
Hsp90aa1	0.0725687	-0.165501	0.985	1	1
mt-Atp8	4.69854e-05	-0.147531	0.531	0.466	0.0939708
Gap43	0.277319	-0.138063	0.765	0.77	1
Hspa8	0.409656	-0.130631	0.985	0.993	1
Uchl1	0.312164	-0.126943	0.956	0.98	1
Snap25	1.51124e-05	-0.12632	0.862	0.98	0.0302248
Pcp4	0.00303077	-0.124975	0.708	0.642	1
Scd2	0.257496	-0.122868	0.779	0.824	1
S100a6	0.000108609	-0.118918	0.324	0.493	0.217217
Calm2	0.0801786	-0.114737	0.963	0.993	1
6330403K07Rik	0.0674542	-0.11088	0.948	0.986	1
AY036118	2.23595e-17	-0.108314	0.427	0.223	4.4719e-14
B3gat2	0.00130313	-0.106113	0.257	0.412	1
Vsnl1	0.846824	-0.103754	0.49	0.473	1
Atp1a1	2.9653e-09	-0.102195	0.811	0.622	5.9306e-06
Tmem176b	0.230725	-0.100823	0.301	0.284	1
Syt1	0.0305851	0.100893	0.85	0.905	1
Gsn	1.7137e-09	0.101387	0.35	0.108	3.42741e-06
Abca1	0.0152406	0.101436	0.513	0.459	1
Aplp1	0.0177588	0.102229	0.857	0.757	1
Tead1	6.24268e-08	0.102508	0.357	0.142	0.000124854
Chodl	3.61712e-18	0.102521	0.492	0.115	7.23425e-15
Thsd7a	0.00895634	0.102555	0.339	0.216	1
Kcnip3	1.00658e-13	0.102672	0.453	0.128	2.01317e-10
Lbhd2	1.78559e-05	0.103543	0.267	0.101	0.0357118
Glul	0.0375821	0.103634	0.541	0.426	1
Ednrb	1.34529e-05	0.103733	0.318	0.135	0.0269057
Adipor2	0.0039338	0.104289	0.502	0.405	1
Ikzf2	7.77614e-08	0.104454	0.357	0.142	0.000155523
Id3	2.03889e-09	0.104881	0.428	0.169	4.07778e-06
Gpm6b	4.79854e-05	0.105225	0.495	0.324	0.0959708
Spon1	3.19684e-10	0.105418	0.438	0.162	6.39368e-07
Itga6	7.1341e-13	0.105585	0.544	0.216	1.42682e-09
Syt11	0.0591185	0.105596	0.977	0.98	1
Gad1	2.24705e-12	0.106169	0.607	0.331	4.49411e-09
Rxfp1	0.017255	0.106577	0.498	0.446	1
Nap1l5	0.00967251	0.106813	0.998	1	1
Oprk1	0.00123947	0.107223	0.287	0.236	1
Hmcn1	2.12464e-05	0.107502	0.388	0.277	0.0424929
Itpr2	3.78911e-08	0.107862	0.37	0.149	7.57821e-05
Lmo3	8.24111e-09	0.108872	0.45	0.189	1.64822e-05
Nwd1	5.73297e-06	0.109521	0.366	0.182	0.0114659
Hlf	2.36852e-07	0.109937	0.508	0.264	0.000473703
Rasgrf2	1.19139e-07	0.109995	0.534	0.304	0.000238279
Gm2a	2.60014e-09	0.110543	0.448	0.182	5.20027e-06
Cep85l	4.6183e-21	0.11085	0.459	0.074	9.2366e-18
Hexb	0.00137885	0.110997	0.386	0.304	1
Smad7	6.15924e-07	0.112259	0.552	0.318	0.00123185
Gaa	0.000361788	0.112386	0.961	0.993	0.723577
Rora	4.18543e-09	0.112636	0.288	0.101	8.37086e-06
Myh7	4.52246e-06	0.112949	0.423	0.223	0.00904493
Klf3	1.26051e-17	0.114047	0.397	0.061	2.52103e-14
Ccp110	0.00335489	0.114375	0.435	0.372	1
Ptch1	0.00144857	0.114914	0.394	0.324	1
Fzd5	9.40186e-13	0.115979	0.572	0.243	1.88037e-09
Lsamp	0.203037	0.116158	0.788	0.736	1
Plcl1	1.12893e-12	0.116251	0.326	0.068	2.25786e-09
Htr2c	1.22183e-06	0.11794	0.406	0.196	0.00244367
Col18a1	2.78682e-05	0.118818	0.572	0.432	0.0557364
Slc25a18	1.37986e-15	0.1197	0.324	0.041	2.75971e-12
Cxcl14	3.03603e-08	0.120069	0.428	0.182	6.07205e-05
Pclo	0.023086	0.120143	0.785	0.676	1
Ifi27	1.76196e-09	0.120189	0.474	0.216	3.52391e-06
Pcdh9	6.44673e-07	0.120249	0.539	0.318	0.00128935
Kcnk2	3.38546e-16	0.12072	0.591	0.27	6.77092e-13
Plagl1	0.00235977	0.121835	0.671	0.541	1
Pam	6.92756e-17	0.122123	0.712	0.385	1.38551e-13
Tacr1	7.6586e-05	0.122722	0.381	0.257	0.153172
Celf2	0.00806264	0.122872	0.621	0.486	1
Csgalnact1	5.30438e-06	0.123143	0.453	0.27	0.0106088
Gpr179	2.06976e-12	0.123173	0.402	0.108	4.13953e-09
Cnksr2	5.4186e-12	0.123221	0.36	0.088	1.08372e-08
Pde1a	3.98055e-09	0.123433	0.482	0.209	7.96109e-06
Fstl5	2.54961e-06	0.123604	0.306	0.115	0.00509923
Rab3c	0.0282984	0.124055	0.927	0.858	1
Peg10	1.72706e-14	0.124218	0.59	0.277	3.45412e-11
Nos1	3.12506e-06	0.125482	0.388	0.189	0.00625011
Ddr1	0.00130738	0.127086	0.386	0.358	1
Rnf13	0.000190509	0.127261	0.332	0.203	0.381018
Ncdn	8.28453e-11	0.127943	0.52	0.257	1.65691e-07
Npy1r	1.05654e-07	0.128141	0.445	0.203	0.000211307
Mmd2	0.00044187	0.12824	0.407	0.243	0.88374
Prlr	5.70854e-19	0.130511	0.534	0.176	1.14171e-15
Bcl2	6.61275e-06	0.130563	0.407	0.203	0.0132255
Gpc3	9.78478e-15	0.131547	0.414	0.095	1.95696e-11
Zbtb20	0.0418811	0.132038	0.927	0.946	1
Aqp4	2.47328e-06	0.132115	0.412	0.196	0.00494656
Rab3b	7.61299e-05	0.132709	0.357	0.243	0.15226
Sulf2	2.05978e-15	0.133722	0.388	0.074	4.11955e-12
A330069E16Rik	2.16155e-19	0.134436	0.448	0.074	4.3231e-16
Parm1	0.00365275	0.135057	0.637	0.534	1
Igf1r	0.000973199	0.136886	0.381	0.277	1
Mpp6	0.000325721	0.137738	0.492	0.365	0.651442
Otud7b	3.74808e-07	0.139183	0.298	0.311	0.000749616
Epn2	5.54627e-21	0.139716	0.503	0.149	1.10925e-17
Kctd12	0.000230353	0.140127	0.446	0.419	0.460706
Fgfr3	3.69749e-27	0.14066	0.464	0.054	7.39499e-24
Sulf1	1.93696e-06	0.141352	0.415	0.297	0.00387392
Ppp1cc	2.17944e-09	0.142713	0.329	0.385	4.35889e-06
Otof	1.21012e-06	0.142835	0.454	0.284	0.00242023
Maged1	0.000592981	0.142988	0.984	0.973	1
Tsc22d3	8.23018e-06	0.144021	0.344	0.277	0.0164604
Appl2	4.28908e-07	0.144265	0.443	0.236	0.000857815
Sned1	5.45416e-05	0.146247	0.528	0.399	0.109083
Spock1	4.96292e-15	0.146914	0.629	0.297	9.92584e-12
Ramp1	1.78251e-05	0.146968	0.498	0.318	0.0356501
Cd63	4.2429e-14	0.149434	0.479	0.169	8.48581e-11
Cnp	7.97107e-16	0.149826	0.371	0.074	1.59421e-12
Grin3a	1.12824e-06	0.150305	0.363	0.155	0.00225649
Prune2	4.48973e-07	0.150456	0.661	0.419	0.000897945
Ntng1	3.39794e-18	0.151301	0.407	0.061	6.79588e-15
Ppp1r16b	7.40308e-11	0.152858	0.467	0.176	1.48062e-07
Hpcal1	0.000298738	0.152913	0.393	0.223	0.597475
Crabp1	3.94508e-08	0.153207	0.362	0.128	7.89016e-05
Sfxn5	3.25537e-15	0.153402	0.365	0.074	6.51074e-12
Nell1	7.77435e-23	0.153563	0.507	0.101	1.55487e-19
Tmeff2	2.903e-18	0.153624	0.448	0.088	5.806e-15
Sparcl1	0.0360458	0.154035	0.611	0.5	1
Ttll3	1.16125e-06	0.154839	0.508	0.419	0.0023225
Klf9	2.29466e-14	0.155227	0.533	0.196	4.58932e-11
Rapgef3	5.66123e-07	0.155499	0.476	0.297	0.00113225
Slc18a2	4.43165e-06	0.157139	0.503	0.318	0.0088633
mt-Nd6	1.55522e-15	0.157566	0.451	0.122	3.11045e-12
Pomc	0.014103	0.157964	0.49	0.378	1
Bcan	0.000377968	0.15811	0.443	0.419	0.755936
Six3	1.68079e-15	0.159598	0.502	0.176	3.36157e-12
Ntsr2	3.78189e-09	0.160833	0.285	0.284	7.56377e-06
Ndrg2	0.00121554	0.161128	0.676	0.514	1
Kcnq3	0.000143979	0.161318	0.505	0.446	0.287957
Luzp2	4.01769e-10	0.161334	0.316	0.081	8.03538e-07
Calcr	7.48733e-14	0.161538	0.56	0.223	1.49747e-10
Adgrl2	0.000324601	0.161899	0.539	0.432	0.649202
Ywhag	0.0207913	0.162808	0.907	0.878	1
Enpp2	2.82617e-14	0.16308	0.446	0.128	5.65234e-11
Rbms3	2.40129e-09	0.16354	0.663	0.378	4.80259e-06
Rmst	2.09979e-13	0.165736	0.467	0.149	4.19959e-10
Lamp5	1.63521e-24	0.166445	0.583	0.128	3.27043e-21
Gpr37l1	6.21907e-05	0.166969	0.383	0.209	0.124381
Plxdc2	1.30076e-11	0.167308	0.438	0.176	2.60152e-08
Six6	2.88074e-11	0.167585	0.35	0.432	5.76147e-08
Pik3r1	5.01404e-22	0.167777	0.536	0.149	1.00281e-18
Gja1	1.3004e-06	0.168603	0.373	0.182	0.00260081
Nrp2	3.55509e-06	0.169217	0.417	0.203	0.00711018
Sema6d	1.96282e-17	0.17021	0.412	0.074	3.92564e-14
Nfib	3.77511e-05	0.170749	0.319	0.169	0.0755023
Pbxip1	5.81983e-07	0.170914	0.409	0.182	0.00116397
Itm2a	5.00017e-11	0.172077	0.388	0.135	1.00003e-07
Cntn2	2.29844e-06	0.173014	0.489	0.284	0.00459688
Adgrg1	5.69175e-07	0.17554	0.51	0.27	0.00113835
Nptx1	1.57733e-13	0.175852	0.309	0.041	3.15467e-10
Ap1s2	9.35996e-07	0.177051	0.635	0.399	0.00187199
Car10	1.43081e-14	0.178173	0.52	0.203	2.86163e-11
Marcks	1.36776e-05	0.178855	0.783	0.588	0.0273552
Cers2	2.52593e-07	0.181578	0.534	0.392	0.000505186
Slc16a2	9.98243e-12	0.182248	0.524	0.257	1.99649e-08
Tbx3	1.22707e-13	0.182326	0.611	0.27	2.45415e-10
Tubb2a	0.00491319	0.183202	0.889	0.791	1
Pgrmc1	0.00131731	0.184301	0.961	0.939	1
Ttyh1	4.90514e-07	0.184616	0.599	0.358	0.000981028
Arhgap23	1.411e-09	0.18629	0.357	0.128	2.822e-06
Tsc22d4	1.31857e-09	0.186367	0.375	0.122	2.63714e-06
Greb1	1.56405e-21	0.187775	0.565	0.142	3.12811e-18
Fat3	1.74681e-14	0.187949	0.445	0.115	3.49361e-11
Sox4	8.61858e-24	0.188275	0.536	0.101	1.72372e-20
Pde4b	4.22646e-06	0.1889	0.484	0.412	0.00845292
Hip1	1.71294e-09	0.189014	0.407	0.182	3.42587e-06
Lcorl	1.47835e-09	0.189307	0.55	0.264	2.95671e-06
Serpine2	4.03417e-07	0.190334	0.37	0.155	0.000806834
Phldb1	5.93033e-07	0.191711	0.36	0.27	0.00118607
Cald1	6.74114e-18	0.193493	0.456	0.101	1.34823e-14
Pcdh17	4.58823e-05	0.193745	0.744	0.554	0.0917646
Id4	1.77472e-06	0.197215	0.505	0.284	0.00354945
Rtn1	4.0712e-05	0.197507	0.977	0.986	0.081424
Slc27a1	3.82135e-13	0.197715	0.453	0.142	7.64269e-10
Bsx	2.59008e-15	0.197766	0.443	0.108	5.18015e-12
Tshz2	5.20911e-13	0.19935	0.531	0.209	1.04182e-09
Fut9	7.22757e-10	0.19962	0.466	0.196	1.44551e-06
Rrbp1	3.40877e-13	0.200988	0.529	0.203	6.81755e-10	Np_SC0
Tmem47	1.99689e-14	0.202384	0.443	0.149	3.99377e-11	Np_SC0
Lgi3	2.55635e-08	0.202463	0.342	0.23	5.11271e-05	Np_SC0
Chl1	2.18164e-05	0.203611	0.495	0.318	0.0436328	Np_SC0
Dpy19l1	9.86231e-06	0.20414	0.56	0.412	0.0197246	Np_SC0
Sirt2	1.52576e-19	0.207354	0.453	0.095	3.05153e-16	Np_SC0
Tubb3	5.97294e-12	0.207696	0.679	0.378	1.19459e-08	Np_SC0
Il1rap	2.35013e-09	0.208829	0.52	0.318	4.70026e-06	Np_SC0
Chga	3.09877e-05	0.20979	0.464	0.277	0.0619755
Plxnb1	3.14289e-07	0.210036	0.497	0.324	0.000628578	Np_SC0
Pex5l	2.02418e-15	0.211168	0.407	0.088	4.04837e-12	Np_SC0
Cacng4	4.17495e-14	0.212032	0.497	0.162	8.3499e-11	Np_SC0
Pcdh11x	4.5597e-06	0.212135	0.521	0.432	0.0091194	Np_SC0
Atp1a2	0.00268744	0.212303	0.593	0.541	1
Col11a1	3.79592e-09	0.212366	0.383	0.149	7.59184e-06	Np_SC0
Gad2	0.000141783	0.213658	0.708	0.541	0.283565
Cacna2d1	0.000139552	0.215238	0.521	0.365	0.279103
Dock10	1.83616e-14	0.215648	0.489	0.149	3.67231e-11	Np_SC0
Gda	1.75103e-05	0.216024	0.567	0.365	0.0350206	Np_SC0
Tcf4	5.00023e-18	0.216737	0.645	0.284	1.00005e-14	Np_SC0
Paqr8	1.16696e-21	0.219463	0.497	0.088	2.33393e-18	Np_SC0
Ptgds	0.000705871	0.220045	0.565	0.392	1
Sema6a	4.5142e-24	0.22391	0.536	0.108	9.0284e-21	Np_SC0
Josd2	6.08056e-13	0.223998	0.389	0.095	1.21611e-09	Np_SC0
Scg2	0.000276942	0.224819	0.946	0.892	0.553884
Pcdh10	5.63256e-17	0.22494	0.625	0.264	1.12651e-13	Np_SC0
Srrm2	0.000301196	0.225821	0.92	0.912	0.602393
Asrgl1	7.0789e-16	0.226417	0.476	0.142	1.41578e-12	Np_SC0
Slc6a11	8.84018e-08	0.229712	0.484	0.236	0.000176804	Np_SC0
Rgs10	4.84601e-09	0.23052	0.34	0.162	9.69203e-06	Np_SC0
Cd81	1.82023e-07	0.230704	0.787	0.554	0.000364045	Np_SC0
Sorbs2	4.01001e-08	0.246028	0.466	0.385	8.02001e-05	Np_SC0
Cspg5	6.07641e-14	0.248201	0.689	0.345	1.21528e-10	Np_SC0
Brinp3	1.39937e-24	0.248211	0.565	0.115	2.79874e-21	Np_SC0
C130073E24Rik	1.47492e-07	0.249599	0.42	0.223	0.000294985	Np_SC0
Atp2b4	7.50234e-07	0.252458	0.521	0.385	0.00150047	Np_SC0
Chgb	4.8819e-14	0.254335	0.728	0.399	9.7638e-11	Np_SC0
Slc32a1	1.16891e-14	0.25707	0.601	0.25	2.33783e-11	Np_SC0
Fam107a	4.16382e-12	0.257293	0.687	0.372	8.32764e-09	Np_SC0
Nfasc	5.71488e-10	0.257573	0.627	0.331	1.14298e-06	Np_SC0
Gm45159	3.76616e-10	0.258858	0.45	0.392	7.53232e-07	Np_SC0
Dst	0.00038191	0.259732	0.884	0.777	0.763819
Atp1b2	1.50673e-15	0.260781	0.507	0.162	3.01346e-12	Np_SC0
Col25a1	8.73847e-10	0.261099	0.513	0.257	1.74769e-06	Np_SC0
Mast4	6.59907e-08	0.262679	0.531	0.392	0.000131981	Np_SC0
Fnbp1	6.48809e-22	0.26391	0.549	0.128	1.29762e-18	Np_SC0
Rreb1	2.92879e-17	0.264836	0.542	0.169	5.85758e-14	Np_SC0
Pde10a	3.40839e-09	0.268836	0.588	0.378	6.81679e-06	Np_SC0
Cadm1	4.21342e-05	0.274725	0.829	0.703	0.0842685
Gm3764	5.07927e-05	0.27862	0.352	0.264	0.101585
Atp1b1	2.5787e-08	0.278932	0.997	0.993	5.15741e-05	Np_SC0
Thy1	4.0024e-08	0.279065	0.559	0.297	8.00481e-05	Np_SC0
Grk3	1.73619e-21	0.279147	0.64	0.209	3.47238e-18	Np_SC0
Ptprn	2.1052e-05	0.283925	0.855	0.736	0.0421039	Np_SC0
Unc13c	4.80365e-11	0.284238	0.438	0.216	9.60731e-08	Np_SC0
Camkv	5.53458e-14	0.284667	0.63	0.277	1.10692e-10	Np_SC0
Clu	8.71034e-07	0.285011	0.761	0.547	0.00174207	Np_SC0
Arhgap6	1.40587e-17	0.286247	0.66	0.27	2.81173e-14	Np_SC0
Cadm2	1.86401e-07	0.28985	0.45	0.264	0.000372803	Np_SC0
Resp18	2.95072e-08	0.293632	0.904	0.716	5.90144e-05	Np_SC0
Peg3	8.31163e-10	0.294677	0.979	0.993	1.66233e-06	Np_SC0
Cartpt	0.0296354	0.294838	0.638	0.52	1
Slc6a1	6.6077e-12	0.295367	0.448	0.149	1.32154e-08	Np_SC0
Cdc37l1	2.6141e-12	0.295832	0.549	0.223	5.22819e-09	Np_SC0
Otp	1.90186e-06	0.295907	0.78	0.608	0.00380373	Np_SC0
Foxn3	6.66371e-19	0.297013	0.493	0.108	1.33274e-15	Np_SC0
Syne1	1.09505e-05	0.300755	0.756	0.554	0.021901	Np_SC0
Elmo1	1.60752e-09	0.305778	0.647	0.453	3.21504e-06	Np_SC0
Ddhd1	7.00082e-13	0.309387	0.49	0.189	1.40016e-09	Np_SC0
Fam46a	4.9425e-13	0.309929	0.52	0.189	9.885e-10	Np_SC0
Abca2	1.86368e-23	0.311079	0.634	0.182	3.72736e-20	Np_SC0
Ptprk	5.90757e-18	0.311242	0.625	0.23	1.18151e-14	Np_SC0
Cadps2	1.57761e-13	0.314325	0.594	0.27	3.15522e-10	Np_SC0
Nrgn	6.98915e-13	0.317717	0.578	0.243	1.39783e-09	Np_SC0
Sv2c	1.50739e-17	0.31923	0.656	0.264	3.01479e-14	Np_SC0
Agt	1.91804e-11	0.32107	0.42	0.392	3.83608e-08	Np_SC0
Scn9a	9.52043e-23	0.321437	0.655	0.23	1.90409e-19	Np_SC0
C230004F18Rik	4.07391e-08	0.322255	0.687	0.432	8.14782e-05	Np_SC0
Ncald	2.43577e-09	0.323678	0.748	0.574	4.87155e-06	Np_SC0
Pnisr	5.64231e-06	0.324285	0.77	0.574	0.0112846	Np_SC0
Frmd4a	1.43344e-10	0.328881	0.594	0.378	2.86688e-07	Np_SC0
Syn2	1.85052e-06	0.334393	0.731	0.534	0.00370104	Np_SC0
Clmn	2.61411e-26	0.335481	0.603	0.128	5.22821e-23	Np_SC0
Pcsk2	1.98712e-08	0.335764	0.634	0.473	3.97424e-05	Np_SC0
St8sia4	2.0413e-13	0.336702	0.601	0.304	4.08259e-10	Np_SC0
Lrp1b	3.56805e-13	0.337607	0.433	0.216	7.1361e-10	Np_SC0
Epha5	4.23314e-10	0.339304	0.495	0.236	8.46629e-07	Np_SC0
Camk2d	5.70084e-11	0.34278	0.625	0.324	1.14017e-07	Np_SC0
Slc38a2	4.26304e-14	0.348554	0.521	0.236	8.52607e-11	Np_SC0
Pcdh19	5.09994e-15	0.352188	0.625	0.264	1.01999e-11	Np_SC0
Gabrg1	5.49615e-21	0.356956	0.663	0.23	1.09923e-17	Np_SC0
Acsl3	1.01865e-18	0.358215	0.526	0.149	2.03729e-15	Np_SC0
Itih3	3.53348e-16	0.359112	0.52	0.162	7.06695e-13	Np_SC0
Macf1	8.98938e-06	0.363196	0.827	0.689	0.0179788	Np_SC0
5031439G07Rik	5.72376e-30	0.366221	0.651	0.142	1.14475e-26	Np_SC0
Cpne7	2.09023e-12	0.36657	0.572	0.345	4.18045e-09	Np_SC0
Ncam1	2.44725e-08	0.367966	0.974	0.953	4.8945e-05	Np_SC0
Calb2	2.90739e-16	0.368129	0.622	0.25	5.81479e-13	Np_SC0
Map7	5.87356e-13	0.370687	0.619	0.331	1.17471e-09	Np_SC0
Alcam	4.13707e-16	0.372531	0.585	0.216	8.27414e-13	Np_SC0
Ildr2	3.57865e-30	0.374576	0.694	0.203	7.15731e-27	Np_SC0
Ntm	4.34174e-09	0.377287	0.629	0.392	8.68347e-06	Np_SC0
Ptma	1.50466e-15	0.384048	0.808	0.459	3.00931e-12	Np_SC0
Ptprt	3.21375e-24	0.384974	0.643	0.182	6.42749e-21	Np_SC0
Edil3	3.454e-32	0.388587	0.66	0.142	6.90801e-29	Np_SC0
Ly6h	1.32067e-13	0.393496	0.997	0.993	2.64134e-10	Np_SC0
Ahi1	4.07223e-13	0.39417	0.99	0.993	8.14445e-10	Np_SC0
Vgf	1.07424e-06	0.396266	0.425	0.264	0.00214849	Np_SC0
Msi2	5.25781e-15	0.396749	0.694	0.331	1.05156e-11	Np_SC0
Nrxn3	1.78815e-08	0.398774	0.818	0.601	3.5763e-05	Np_SC0
Gnas	1.67188e-17	0.399837	0.997	1	3.34375e-14	Np_SC0
Serpini1	5.24379e-16	0.401822	0.697	0.345	1.04876e-12	Np_SC0
Ppp1r9a	1.75183e-15	0.402406	0.808	0.459	3.50367e-12	Np_SC0
Aatk	9.47849e-15	0.403493	0.671	0.318	1.8957e-11	Np_SC0
Ptprd	1.72196e-16	0.403955	0.5	0.135	3.44393e-13	Np_SC0
Tenm1	4.02826e-21	0.407236	0.568	0.149	8.05652e-18	Np_SC0
4930447C04Rik	4.04093e-22	0.412398	0.534	0.122	8.08187e-19	Np_SC0
Rnf128	2.03566e-14	0.418042	0.695	0.419	4.07133e-11	Np_SC0
Dmd	4.847e-24	0.423639	0.739	0.284	9.69399e-21	Np_SC0
Auts2	1.21779e-16	0.428419	0.64	0.297	2.43557e-13	Np_SC0
Asb4	5.33852e-18	0.430126	0.757	0.365	1.0677e-14	Np_SC0
Zdbf2	5.3995e-22	0.430696	0.822	0.405	1.0799e-18	Np_SC0
Plp1	0.0847068	0.432227	0.433	0.351	1
Bin1	1.1496e-21	0.432345	0.752	0.318	2.2992e-18	Np_SC0
Dpp10	4.29218e-20	0.433186	0.632	0.216	8.58436e-17	Np_SC0
Ttc3	1.33747e-18	0.437163	0.995	0.993	2.67493e-15	Np_SC0
Hap1	6.87683e-16	0.44019	0.979	0.953	1.37537e-12	Np_SC0
Opcml	1.03425e-14	0.447103	0.624	0.331	2.06849e-11	Np_SC0
Pnoc	3.4362e-25	0.453581	0.544	0.101	6.8724e-22	Np_SC0
Ecel1	1.02277e-18	0.456973	0.679	0.27	2.04554e-15	Np_SC0
Dlk1	1.54552e-19	0.50378	0.922	0.595	3.09104e-16	Np_SC0
Isl1	5.13948e-19	0.518954	0.72	0.453	1.0279e-15	Np_SC0
Gria2	2.24304e-16	0.525928	0.964	0.919	4.48608e-13	Np_SC0
Ogt	1.85222e-21	0.529682	0.733	0.358	3.70444e-18	Np_SC0
Atp2b1	6.86651e-23	0.55104	0.826	0.399	1.3733e-19	Np_SC0
AC149090.1	4.99938e-15	0.602626	0.899	0.75	9.99876e-12	Np_SC0
Gria3	2.13083e-21	0.619232	0.715	0.405	4.26165e-18	Np_SC0
Ptprz1	2.11696e-35	0.648046	0.801	0.25	4.23392e-32	Np_SC0
Kcnq1ot1	4.451e-24	0.693392	0.976	0.932	8.90199e-21	Np_SC0
Pcdh7	4.50537e-32	0.723764	0.875	0.426	9.01074e-29	Np_SC0
Gpr101	3.64275e-29	0.7852	0.713	0.236	7.28549e-26	Np_SC0
Miat	4.0334e-44	0.832265	0.752	0.182	8.06681e-41	Np_SC0
Gm47283	2.56807e-26	0.867267	0.956	0.959	5.13615e-23	Np_SC0
Malat1	2.58894e-140	1.56499	1	1	5.17788e-137	Np_SC0
Meg3	3.34589e-137	1.85791	1	1	6.69178e-134	Np_SC0
Snhg11	6.13666e-215	2.23975	1	1	1.22733e-211	Np_SC0
Sst	7.506e-45	2.54773	0.842	0.311	1.5012e-41	Np_SC0

## Sheet: Np_SC2 vs Np_SC9
	p_val	avg_log2FC	Percent Expression in N_SC2	Percent Expression in N_SC9	p_val_adj	Cluster Enrichment
Gm42418	9.58809e-39	-0.912244	1	1	1.91762e-35	Np_SC9
mt-Co1	2.49667e-57	-0.885205	1	1	4.99335e-54	Np_SC9
Nnat	1.0584e-24	-0.785747	0.487	0.885	2.1168e-21	Np_SC9
mt-Nd3	1.47319e-18	-0.636206	0.629	0.892	2.94638e-15	Np_SC9
Mt3	6.58298e-13	-0.602169	0.536	0.818	1.3166e-09	Np_SC9
Cst3	8.15065e-18	-0.597643	0.89	0.993	1.63013e-14	Np_SC9
Apoe	6.0774e-24	-0.594811	0.519	0.939	1.21548e-20	Np_SC9
mt-Nd2	2.24613e-18	-0.584613	0.985	1	4.49225e-15	Np_SC9
mt-Nd5	6.67416e-17	-0.546125	0.807	0.993	1.33483e-13	Np_SC9
Syt1	1.0127e-20	-0.545779	0.509	0.905	2.0254e-17	Np_SC9
Rpl36	9.34303e-13	-0.541989	0.786	0.946	1.86861e-09	Np_SC9
Rpl37a	1.06603e-11	-0.500793	0.896	0.986	2.13206e-08	Np_SC9
Rpl38	5.79368e-12	-0.490194	0.913	0.986	1.15874e-08	Np_SC9
Slc1a2	2.90879e-14	-0.481501	0.494	0.838	5.81758e-11	Np_SC9
Rpl23	2.25876e-10	-0.474759	0.903	0.993	4.51752e-07	Np_SC9
Rpl24	9.94212e-11	-0.464774	0.812	0.959	1.98842e-07	Np_SC9
Ckb	2.88166e-14	-0.462278	0.716	0.959	5.76332e-11	Np_SC9
Snap25	5.98848e-16	-0.453566	0.727	0.98	1.1977e-12	Np_SC9
App	8.13103e-10	-0.452817	0.884	0.98	1.62621e-06	Np_SC9
mt-Nd1	1.55619e-12	-0.448857	0.977	1	3.11237e-09	Np_SC9
Pomc	0.00296023	-0.444737	0.235	0.378	1
Mt1	4.76596e-08	-0.444421	0.314	0.493	9.53192e-05	Np_SC9
Fth1	1.62876e-10	-0.440952	0.828	0.973	3.25753e-07	Np_SC9
Itm2c	2.70718e-10	-0.436345	0.835	0.973	5.41436e-07	Np_SC9
Tuba1a	9.71821e-09	-0.421668	0.653	0.872	1.94364e-05	Np_SC9
Rpl21	1.1213e-09	-0.418749	0.922	1	2.24259e-06	Np_SC9
Tmsb4x	2.96228e-10	-0.408036	0.896	0.993	5.92456e-07	Np_SC9
mt-Nd4l	2.90202e-11	-0.407878	0.811	0.986	5.80404e-08	Np_SC9
Rpl27a	4.75043e-11	-0.407819	0.847	0.993	9.50086e-08	Np_SC9
Tmsb10	2.25218e-12	-0.405688	0.604	0.608	4.50437e-09	Np_SC9
Rps29	7.5718e-10	-0.404504	0.9	0.986	1.51436e-06	Np_SC9
Rpl3	1.61391e-08	-0.402987	0.883	0.986	3.22782e-05	Np_SC9
Eef1a1	1.27057e-10	-0.400356	0.992	1	2.54114e-07	Np_SC9
Gap43	4.41005e-07	-0.390948	0.544	0.77	0.000882011	Np_SC9
Rps24	2.3909e-09	-0.386976	0.949	1	4.78179e-06	Np_SC9
Rps10	3.23581e-06	-0.384247	0.778	0.885	0.00647162	Np_SC9
Rps21	5.64622e-08	-0.379584	0.905	0.98	0.000112924	Np_SC9
Rps27a	4.83987e-08	-0.377393	0.934	1	9.67975e-05	Np_SC9
Rpl41	2.78617e-07	-0.373201	0.945	0.986	0.000557235	Np_SC9
Ppia	6.5152e-07	-0.365479	0.913	0.98	0.00130304	Np_SC9
Rps14	9.78709e-07	-0.362091	0.797	0.919	0.00195742	Np_SC9
Fau	1.09611e-06	-0.354605	0.936	0.986	0.00219223	Np_SC9
6330403K07Rik	3.73791e-07	-0.351866	0.886	0.986	0.000747581	Np_SC9
Rpl37	1.60315e-07	-0.34882	0.93	1	0.000320629	Np_SC9
Rps8	4.89472e-07	-0.341647	0.924	1	0.000978944	Np_SC9
Gapdh	6.45593e-08	-0.341646	0.864	0.986	0.000129119	Np_SC9
Vsnl1	3.48521e-07	-0.34111	0.237	0.473	0.000697042	Np_SC9
Rps20	4.77489e-05	-0.336872	0.794	0.926	0.0954978
Lars2	0.000898825	-0.333289	0.57	0.649	1
Rpsa	1.9004e-07	-0.332818	0.884	0.993	0.000380081	Np_SC9
Prkacb	2.01184e-07	-0.332276	0.803	0.959	0.000402369	Np_SC9
Rplp1	8.53993e-07	-0.331133	0.945	1	0.00170799	Np_SC9
Rpl11	3.2542e-06	-0.322496	0.873	0.98	0.00650839	Np_SC9
Atp1a2	9.87399e-05	-0.316186	0.345	0.541	0.19748
Pfdn5	8.13218e-05	-0.312363	0.691	0.777	0.162644
Rps19	7.26421e-08	-0.307407	0.833	0.98	0.000145284	Np_SC9
Rpl19	0.000169933	-0.303548	0.953	0.986	0.339867
Rps28	0.0024732	-0.296163	0.727	0.784	1
Rpl13	6.35627e-06	-0.292805	0.966	1	0.0127125	Np_SC9
Psap	3.07933e-07	-0.291845	0.877	0.993	0.000615866	Np_SC9
Calm2	3.50265e-06	-0.287276	0.902	0.993	0.0070053	Np_SC9
Scd2	1.05699e-07	-0.286898	0.581	0.824	0.000211398	Np_SC9
Rpl26	0.000946651	-0.285531	0.758	0.872	1
Rps12	0.00291994	-0.283945	0.742	0.824	1
Sparc	0.0139543	-0.281179	0.462	0.581	1
Cpe	2.52124e-09	-0.278515	0.727	0.946	5.04247e-06	Np_SC9
2900097C17Rik	4.13608e-08	-0.275686	0.741	0.939	8.27216e-05	Np_SC9
Impact	2.92114e-05	-0.272657	0.794	0.932	0.0584229
Calb1	3.57064e-05	-0.270268	0.21	0.399	0.0714127
Rps23	0.000127455	-0.269328	0.799	0.919	0.254909
Chchd10	0.00306279	-0.268445	0.403	0.561	1
Plpp3	0.000569001	-0.263976	0.136	0.277	1
Hspa8	0.000219868	-0.256811	0.938	0.993	0.439735
Rpl32	0.0023291	-0.248713	0.75	0.872	1
mt-Atp8	0.000820075	-0.247555	0.312	0.466	1
Rps3a1	0.00427846	-0.244304	0.788	0.892	1
Parm1	1.126e-17	-0.234012	0.199	0.534	2.252e-14	Np_SC9
Chgb	0.000457837	-0.233387	0.369	0.399	0.915674
Rps11	0.00183203	-0.224202	0.807	0.912	1
Ppp3ca	1.83931e-08	-0.223457	0.64	0.878	3.67861e-05	Np_SC9
Mt2	0.000686575	-0.223043	0.165	0.304	1
Tpt1	0.0114287	-0.220101	0.65	0.689	1
Qk	0.00258545	-0.216582	0.256	0.304	1
Rpl18a	0.00713822	-0.21566	0.803	0.892	1
Rpl9	0.00128867	-0.209774	0.958	1	1
Bex2	0.00113797	-0.207462	0.896	0.973	1
Rpl30	3.07025e-06	-0.207342	0.807	0.959	0.0061405	Np_SC9
Tubb4a	0.121238	-0.206234	0.358	0.432	1
Scg2	0.0217501	-0.206052	0.797	0.892	1
Uchl1	0.00114632	-0.20372	0.898	0.98	1
Rpl34	0.133183	-0.19946	0.648	0.689	1
Basp1	0.0155658	-0.197388	0.742	0.845	1
Rps27	0.0699933	-0.195103	0.854	0.919	1
Slc1a3	0.0205078	-0.192649	0.227	0.27	1
Glul	0.0114019	-0.191881	0.294	0.426	1
Rpl10	0.042219	-0.184583	0.629	0.642	1
Rpl8	0.000591183	-0.174668	0.909	0.986	1
Rorb	8.52369e-06	-0.174458	0.121	0.284	0.0170474
Gda	0.000345203	-0.168697	0.208	0.365	0.690405
Dner	9.32117e-05	-0.166691	0.373	0.365	0.186423
Tubb2b	3.54483e-05	-0.165325	0.297	0.277	0.0708966
Tubb2a	0.0138729	-0.16425	0.676	0.791	1
Mbp	0.0990458	-0.162279	0.33	0.426	1
Ubb	0.000638333	-0.159395	0.924	0.993	1
Ndrg2	0.144742	-0.15897	0.424	0.514	1
Gstm1	0.000212392	-0.158357	0.205	0.345	0.424784
Rpl17	0.030474	-0.144194	0.693	0.676	1
Rab3c	0.0684451	-0.143655	0.777	0.858	1
Pcdh10	0.0829043	-0.142856	0.231	0.264	1
Plp1	0.148164	-0.13805	0.299	0.351	1
Calm1	0.00401904	-0.136792	0.96	1	1
Pdyn	0.00213471	-0.136158	0.237	0.385	1
Bcan	4.09462e-16	-0.133635	0.119	0.419	8.18925e-13
Ndn	2.29115e-05	-0.131375	0.879	0.986	0.0458229
Sparcl1	0.0101844	-0.130437	0.367	0.5	1
Tmem130	0.452405	-0.129722	0.758	0.797	1
Pcdh11x	2.22917e-10	-0.126402	0.165	0.432	4.45834e-07
Rpl35a	0.00557695	-0.124864	0.939	0.993	1
Camk2n1	0.0251136	-0.122641	0.479	0.466	1
Esr1	4.52694e-23	-0.121809	0.072	0.412	9.05388e-20
Dbi	0.000286452	-0.119688	0.254	0.243	0.572905
Cartpt	2.22666e-06	-0.118481	0.305	0.52	0.00445332
Zwint	5.11544e-05	-0.118417	0.884	0.986	0.102309
Tmem35a	0.234132	-0.115957	0.21	0.27	1
Stmn1	0.000852321	-0.115775	0.746	0.878	1
Tac1	1.15575e-11	-0.113961	0.233	0.534	2.31149e-08
Timp3	9.65389e-08	-0.113577	0.233	0.446	0.000193078
Gpx3	0.726306	-0.110536	0.674	0.669	1
Grm5	0.659258	-0.108923	0.295	0.324	1
Nr4a2	0.00931613	-0.106416	0.29	0.392	1
Rpl14	0.00224407	-0.105275	0.837	0.939	1
Celf2	0.0220235	-0.102942	0.384	0.486	1
Sphkap	0.00290372	-0.101687	0.172	0.297	1
Abhd2	0.000554171	0.101228	0.316	0.169	1
Pik3r1	3.09717e-05	0.102443	0.303	0.149	0.0619435
Cspg5	0.00106782	0.103307	0.513	0.345	1
Oprk1	0.0369614	0.104245	0.295	0.236	1
Sned1	1.14116e-20	0.105634	0.161	0.399	2.28232e-17
Slc32a1	0.00530728	0.107899	0.388	0.25	1
Syt4	0.00149047	0.109334	0.741	0.804	1
Cadps2	1.57346e-05	0.110187	0.225	0.27	0.0314693
Rapgef3	6.13631e-05	0.11172	0.233	0.297	0.122726
Ap1s2	0.0586522	0.11344	0.475	0.399	1
Gpm6b	0.0202061	0.114385	0.443	0.324	1
Paqr8	1.38375e-05	0.115687	0.256	0.088	0.027675
Syt6	6.42843e-05	0.11867	0.256	0.297	0.128569
Myo6	0.0588721	0.118771	0.322	0.25	1
Pex5l	1.35499e-07	0.118976	0.294	0.088	0.000270999
Col18a1	9.84588e-06	0.119231	0.324	0.432	0.0196918
Ppp1r16b	0.001802	0.120233	0.307	0.176	1
Gabrg1	0.016896	0.120467	0.341	0.23	1
Cadm1	0.00270759	0.122902	0.68	0.703	1
C130073E24Rik	0.045687	0.124051	0.305	0.223	1
Nptx1	2.20763e-12	0.124343	0.295	0.041	4.41526e-09
Camkv	0.000892426	0.125965	0.445	0.277	1
Svil	1.72012e-09	0.12826	0.182	0.291	3.44023e-06
Grk3	0.0314629	0.129102	0.303	0.209	1
Gria3	0.00146031	0.130485	0.386	0.405	1
Chga	0.0182535	0.132232	0.402	0.277	1
Thsd7a	0.0180087	0.132317	0.309	0.216	1
Fut9	6.23037e-07	0.135789	0.405	0.196	0.00124607
Cacng4	0.00686357	0.136686	0.252	0.162	1
Synpr	0.0004197	0.136805	0.322	0.351	0.839401
Pcsk2	3.88477e-10	0.140586	0.366	0.473	7.76954e-07
Prox1	3.57442e-13	0.141055	0.295	0.365	7.14883e-10
Spock1	0.00182287	0.14155	0.453	0.297	1
Pmepa1	0.00301947	0.143629	0.28	0.25	1
Ildr2	4.06873e-05	0.146242	0.366	0.203	0.0813746
Pclo	0.00106457	0.146253	0.676	0.676	1
Syne2	1.89275e-05	0.146765	0.299	0.311	0.0378551
Corin	5.26266e-12	0.147249	0.362	0.527	1.05253e-08
Il1rap	1.16036e-08	0.150806	0.241	0.318	2.32072e-05
Pam	6.11141e-05	0.151152	0.572	0.385	0.122228
Cnr1	4.81736e-08	0.151319	0.294	0.088	9.63472e-05
Sema6d	1.80795e-06	0.151544	0.252	0.074	0.0036159
Atp2b1	0.0176297	0.151662	0.53	0.399	1
Adgrl2	6.22659e-12	0.157258	0.307	0.432	1.24532e-08
Xylt1	1.16246e-11	0.158109	0.241	0.318	2.32493e-08
Otud7b	7.72929e-10	0.160102	0.227	0.311	1.54586e-06
Dgkb	3.02304e-06	0.166941	0.551	0.331	0.00604609
Kif13b	0.000207573	0.168988	0.339	0.264	0.415146
Pou2f2	0.000713551	0.170179	0.394	0.236	1
Cers2	4.04896e-10	0.171154	0.273	0.392	8.09792e-07
Ttll3	3.39182e-10	0.171764	0.294	0.419	6.78363e-07
Deptor	1.34852e-08	0.173488	0.314	0.358	2.69703e-05
Hcn1	0.00151959	0.174868	0.297	0.155	1
Fnbp1	0.000644013	0.176343	0.271	0.128	1
Sv2c	0.000395686	0.177003	0.428	0.264	0.791371
Satb1	2.00288e-05	0.177562	0.341	0.155	0.0400575
Calcr	0.00276038	0.180591	0.364	0.223	1
Cpne7	6.09857e-09	0.184355	0.28	0.345	1.21971e-05
Asb4	0.00131292	0.184376	0.523	0.365	1
Slc12a2	6.34542e-07	0.185131	0.428	0.196	0.00126908
Cd63	0.000250727	0.187656	0.335	0.169	0.501454
Ly6h	5.16734e-05	0.191077	0.973	0.993	0.103347
Ppp1cc	5.40853e-06	0.191391	0.384	0.385	0.0108171
Tbx3	0.000452482	0.195361	0.428	0.27	0.904964
Ecel1	0.00209124	0.19599	0.417	0.27	1
Plcl1	2.90122e-10	0.196055	0.307	0.068	5.80243e-07
Tshz2	0.000733143	0.196465	0.367	0.209	1
Dpp10	0.000120371	0.196827	0.392	0.216	0.240742
Ptma	0.00840729	0.197412	0.587	0.459	1
Chl1	0.000122567	0.203469	0.381	0.318	0.245133
Tead1	1.84429e-06	0.210922	0.35	0.142	0.00368859	Np_SC2
Pitpnc1	0.000534743	0.215517	0.517	0.351	1
Serpina3n	6.59708e-05	0.217111	0.727	0.628	0.131942
Mast4	2.81559e-14	0.217638	0.33	0.392	5.63119e-11	Np_SC2
Ahi1	6.61149e-07	0.219016	0.975	0.993	0.0013223	Np_SC2
Appl2	1.06208e-08	0.219899	0.292	0.236	2.12417e-05	Np_SC2
Gnas	1.03861e-05	0.222012	0.998	1	0.0207722	Np_SC2
H2-D1	9.02357e-06	0.222466	0.462	0.297	0.0180471	Np_SC2
Unc5d	0.001079	0.223935	0.697	0.541	1
mt-Nd6	2.97732e-09	0.22734	0.375	0.122	5.95464e-06	Np_SC2
Lcorl	4.74325e-06	0.231177	0.366	0.264	0.00948651	Np_SC2
Hs6st2	1.10896e-07	0.231352	0.513	0.27	0.000221793	Np_SC2
Atp1a1	9.26807e-05	0.233152	0.79	0.622	0.185361
Aatk	0.000241901	0.237374	0.443	0.318	0.483802
Lsamp	1.62038e-07	0.240804	0.72	0.736	0.000324075	Np_SC2
Resp18	0.000168914	0.242882	0.833	0.716	0.337828
Elmo1	1.1486e-10	0.243513	0.411	0.453	2.29719e-07	Np_SC2
Arhgap36	0.000521125	0.244115	0.504	0.351	1
Irs4	4.37601e-05	0.246274	0.756	0.615	0.0875202
Sema6a	8.36168e-06	0.250356	0.288	0.108	0.0167234	Np_SC2
Josd2	4.84457e-10	0.25066	0.341	0.095	9.68915e-07	Np_SC2
Abca2	1.2339e-05	0.255265	0.354	0.182	0.024678	Np_SC2
Pgr15l	9.34207e-09	0.25536	0.43	0.169	1.86841e-05	Np_SC2
Camk2d	1.11085e-05	0.256909	0.508	0.324	0.022217	Np_SC2
Rasgrp1	6.77177e-06	0.258457	0.483	0.385	0.0135435	Np_SC2
Frmd4a	2.02414e-16	0.26063	0.4	0.378	4.04828e-13	Np_SC2
5031439G07Rik	1.42808e-10	0.264165	0.426	0.142	2.85616e-07	Np_SC2
Zdbf2	2.5606e-05	0.273768	0.617	0.405	0.051212
Macf1	5.60212e-06	0.27454	0.691	0.689	0.0112042	Np_SC2
Kcnq3	1.2548e-13	0.27828	0.405	0.446	2.5096e-10	Np_SC2
Cdc37l1	8.08557e-06	0.280324	0.39	0.223	0.0161711	Np_SC2
Nrxn3	9.35371e-06	0.289014	0.65	0.601	0.0187074	Np_SC2
Nfasc	5.98049e-06	0.292869	0.492	0.331	0.011961	Np_SC2
Pcsk1n	4.15463e-06	0.29558	1	1	0.00830926	Np_SC2
Ncam2	2.15028e-07	0.296382	0.436	0.351	0.000430056	Np_SC2
Otp	2.27191e-06	0.298516	0.75	0.608	0.00454382	Np_SC2
Epha5	1.25065e-06	0.304995	0.413	0.236	0.0025013	Np_SC2
Hap1	7.50098e-09	0.305258	0.962	0.953	1.5002e-05	Np_SC2
Gpr179	3.50408e-09	0.306008	0.292	0.108	7.00815e-06	Np_SC2
Bin1	4.78767e-07	0.307593	0.561	0.318	0.000957534	Np_SC2
Ttc3	3.43306e-08	0.309249	0.996	0.993	6.86612e-05	Np_SC2
Car10	7.59963e-06	0.311941	0.411	0.203	0.0151993	Np_SC2
Enpp2	5.26587e-09	0.312647	0.381	0.128	1.05317e-05	Np_SC2
Dlk1	2.65621e-08	0.313507	0.828	0.595	5.31241e-05	Np_SC2
Ptprn	4.32496e-06	0.318049	0.799	0.736	0.00864992	Np_SC2
Kcnk9	3.08721e-06	0.320856	0.653	0.493	0.00617443	Np_SC2
Ptprz1	1.16226e-07	0.332353	0.506	0.25	0.000232452	Np_SC2
Gad2	1.62187e-06	0.333264	0.653	0.541	0.00324375	Np_SC2
Pcdh17	5.01854e-06	0.343304	0.703	0.554	0.0100371	Np_SC2
Csgalnact1	2.8056e-12	0.375374	0.441	0.27	5.61119e-09	Np_SC2
Tcf4	6.91377e-09	0.375461	0.564	0.284	1.38275e-05	Np_SC2
Map7	4.23758e-18	0.37611	0.43	0.331	8.47516e-15	Np_SC2
Rreb1	8.55111e-17	0.382115	0.331	0.169	1.71022e-13	Np_SC2
Ptprd	1.17434e-08	0.394123	0.373	0.135	2.34867e-05	Np_SC2
Rmst	2.70484e-13	0.399076	0.475	0.149	5.40967e-10	Np_SC2
St8sia4	2.95782e-15	0.409635	0.46	0.304	5.91564e-12	Np_SC2
Ppp1r9a	4.14949e-08	0.411199	0.706	0.459	8.29898e-05	Np_SC2
Isl1	4.29719e-17	0.415544	0.494	0.453	8.59437e-14	Np_SC2
Syne1	2.81328e-08	0.416848	0.644	0.554	5.62655e-05	Np_SC2
Zfhx3	4.53133e-11	0.421121	0.695	0.385	9.06265e-08	Np_SC2
Kcnk2	9.60297e-13	0.426512	0.612	0.27	1.92059e-09	Np_SC2
Slc38a2	4.31881e-18	0.431898	0.411	0.236	8.63761e-15	Np_SC2
4930447C04Rik	2.27627e-16	0.452842	0.377	0.122	4.55254e-13	Np_SC2
Gm45159	5.99866e-20	0.466517	0.432	0.392	1.19973e-16	Np_SC2
Ogt	2.10107e-14	0.470523	0.504	0.358	4.20213e-11	Np_SC2
Ptprk	1.58905e-15	0.475064	0.527	0.23	3.1781e-12	Np_SC2
Peg3	4.78073e-19	0.475979	0.975	0.993	9.56145e-16	Np_SC2
Sorbs2	2.31211e-25	0.494531	0.46	0.385	4.62422e-22	Np_SC2
Dst	7.76056e-13	0.514028	0.86	0.777	1.55211e-09	Np_SC2
C230004F18Rik	5.75318e-10	0.514371	0.631	0.432	1.15064e-06	Np_SC2
Msi2	3.26712e-15	0.531726	0.65	0.331	6.53425e-12	Np_SC2
Pcdh7	5.2902e-14	0.540736	0.701	0.426	1.05804e-10	Np_SC2
Gria2	7.90906e-19	0.54644	0.949	0.919	1.58181e-15	Np_SC2
Plagl1	5.76249e-19	0.567027	0.706	0.541	1.1525e-15	Np_SC2
Scn9a	2.56357e-15	0.567151	0.6	0.23	5.12714e-12	Np_SC2
Acvr1c	2.80074e-13	0.567762	0.718	0.52	5.60148e-10	Np_SC2
Pnisr	6.63991e-14	0.583273	0.741	0.574	1.32798e-10	Np_SC2
Arhgap6	2.12928e-17	0.586961	0.646	0.27	4.25857e-14	Np_SC2
Pcdh9	4.95427e-19	0.645384	0.722	0.318	9.90854e-16	Np_SC2
Auts2	5.07285e-26	0.66775	0.606	0.297	1.01457e-22	Np_SC2
Dmd	1.14033e-22	0.671275	0.68	0.284	2.28066e-19	Np_SC2
Npy	3.06432e-16	0.700756	0.951	0.804	6.12865e-13	Np_SC2
Srrm2	7.84461e-26	0.710495	0.941	0.912	1.56892e-22	Np_SC2
Agrp	8.63539e-19	0.753454	0.972	0.872	1.72708e-15	Np_SC2
AC149090.1	1.97532e-24	0.774692	0.852	0.75	3.95064e-21	Np_SC2
Miat	1.23013e-30	0.796169	0.597	0.182	2.46026e-27	Np_SC2
Prune2	8.5584e-29	0.82208	0.824	0.419	1.71168e-25	Np_SC2
Kcnq1ot1	2.09769e-43	1.00761	0.951	0.932	4.19537e-40	Np_SC2
Meg3	3.12164e-71	1.26034	1	1	6.24329e-68	Np_SC2
Gm47283	1.72518e-57	1.39316	0.96	0.959	3.45036e-54	Np_SC2
Malat1	9.74361e-143	1.7253	1	1	1.94872e-139	Np_SC2
Snhg11	3.08575e-231	2.32748	1	1	6.17149e-228	Np_SC2
