# Supplementary material for: Cell-specific transcriptome changes in the hypothalamic arcuate nucleus in a mouse deoxycorticosterone acetate-salt model of hypertension
Source: Front Cell Neurosci. 2023 May 24;17:1207350. doi: 10.3389/fncel.2023.1207350 (PMC10244568; doi:10.3389/fncel.2023.1207350)
Supplement: Supplementary file 5 [file Data_Sheet_5.XLSX]

## Sheet: ShinyGo 0.75 - GO Bio Process
Table S10 - N_SC0 vs N_SC2 Enrichment Results
Enrichment FDR	nGenes	Pathway Genes	Fold Enrichment	Pathway	URL	Genes
3.55005e-07	11	186	11.7661	Positive regulation of synaptic transmission	http://amigo.geneontology.org/amigo/term/GO:0050806	Apoe Calb2 Slc1a3 App Serpine2 Dbi Glul Snap25 Calb1 Syt1 Nrgn
4.26202e-07	16	492	6.47007	Modulation of chemical synaptic transmission	http://amigo.geneontology.org/amigo/term/GO:0050804	Calm1 Apoe Calb2 Slc1a3 App Serpine2 Dbi Glul Snap25 Calb1 Slc6a1 Agt Syt1 Vgf Nrgn Unc13c
4.26202e-07	16	493	6.45694	Regulation of trans-synaptic signaling	http://amigo.geneontology.org/amigo/term/GO:0099177	Calm1 Apoe Calb2 Slc1a3 App Serpine2 Dbi Glul Snap25 Calb1 Slc6a1 Agt Syt1 Vgf Nrgn Unc13c
1.2117e-08	21	699	5.97718	Anterograde trans-synaptic signaling	http://amigo.geneontology.org/amigo/term/GO:0098916	Calm1 Gabrg1 Apoe Calb2 Slc1a3 Syn2 Cadps2 Cartpt App Serpine2 Dbi Glul Snap25 Calb1 Slc6a1 Agt Syt1 Vgf Pnoc Nrgn Unc13c
1.2117e-08	21	699	5.97718	Chemical synaptic transmission	http://amigo.geneontology.org/amigo/term/GO:0007268	Calm1 Gabrg1 Apoe Calb2 Slc1a3 Syn2 Cadps2 Cartpt App Serpine2 Dbi Glul Snap25 Calb1 Slc6a1 Agt Syt1 Vgf Pnoc Nrgn Unc13c
7.50187e-09	22	738	5.93089	Synaptic signaling	http://amigo.geneontology.org/amigo/term/GO:0099536	Calm1 Gabrg1 Apoe Calb2 Slc1a3 Syn2 Cadps2 Cartpt Ly6h App Serpine2 Dbi Glul Snap25 Calb1 Slc6a1 Agt Syt1 Vgf Pnoc Nrgn Unc13c
1.3597e-08	21	707	5.90954	Trans-synaptic signaling	http://amigo.geneontology.org/amigo/term/GO:0099537	Calm1 Gabrg1 Apoe Calb2 Slc1a3 Syn2 Cadps2 Cartpt App Serpine2 Dbi Glul Snap25 Calb1 Slc6a1 Agt Syt1 Vgf Pnoc Nrgn Unc13c
2.304e-07	18	607	5.89981	Cellular metal ion homeostasis	http://amigo.geneontology.org/amigo/term/GO:0006875	Calm1 Apoe Calb2 Slc1a3 Atp1a2 Atp2b1 App Fth1 Dbi Atp2b4 Atp1b1 Ghrh Calb1 Mt3 Mt1 Agt Thy1 Atp1b2
1.58695e-12	30	1014	5.88623	Central nervous system development	http://amigo.geneontology.org/amigo/term/GO:0007417	Ckb Psap Bcan Slc1a2 Atp1a2 Ubb Atp2b1 Clu App Serpine2 Dbi Atp2b4 Cst3 Ghrh Plpp3 Slc6a11 Plp1 Mt3 Mobp Acsl3 Syt1 Dner Six3 Atp1b2 Pcdh19 Nrgn mt-Co1 Nnat Ptprz1 Marcks
1.57429e-08	21	716	5.83526	Behavior	http://amigo.geneontology.org/amigo/term/GO:0007610	Apoe Psap Slc1a2 Slc1a3 Pgrmc1 Atp1a2 Ptgds Cartpt App Gaa Dbi Snap25 Cst3 Ghrh Calb1 Slc6a1 Agt Six3 Atp1b2 Nrgn Ptprz1
9.44021e-09	22	758	5.77441	Brain development	http://amigo.geneontology.org/amigo/term/GO:0007420	Ckb Psap Bcan Slc1a2 Atp1a2 Ubb Atp2b1 App Serpine2 Dbi Atp2b4 Cst3 Ghrh Slc6a11 Acsl3 Syt1 Six3 Atp1b2 Pcdh19 Nrgn mt-Co1 Nnat
2.304e-07	19	684	5.52652	Cellular ion homeostasis	http://amigo.geneontology.org/amigo/term/GO:0006873	Calm1 Ckb Apoe Calb2 Slc1a3 Atp1a2 Atp2b1 App Fth1 Dbi Atp2b4 Atp1b1 Ghrh Calb1 Mt3 Mt1 Agt Thy1 Atp1b2
1.8445e-08	22	805	5.43727	Head development	http://amigo.geneontology.org/amigo/term/GO:0060322	Ckb Psap Bcan Slc1a2 Atp1a2 Ubb Atp2b1 App Serpine2 Dbi Atp2b4 Cst3 Ghrh Slc6a11 Acsl3 Syt1 Six3 Atp1b2 Pcdh19 Nrgn mt-Co1 Nnat
7.00176e-07	18	671	5.33708	Cellular cation homeostasis	http://amigo.geneontology.org/amigo/term/GO:0030003	Calm1 Apoe Calb2 Slc1a3 Atp1a2 Atp2b1 App Fth1 Dbi Atp2b4 Atp1b1 Ghrh Calb1 Mt3 Mt1 Agt Thy1 Atp1b2
7.58663e-09	24	905	5.27614	Export from cell	http://amigo.geneontology.org/amigo/term/GO:0140352	Calm1 Apoe Psap Atp1a2 Syn2 Ptgds Cadps2 Atp2b1 Pomc Cartpt Rab3c Serpine2 Glul Atp1b1 Snap25 Ghrh Agt Syt1 Vgf Ildr2 Atp1b2 Vsnl1 Unc13c Nnat
2.82305e-07	21	866	4.82453	Cellular chemical homeostasis	http://amigo.geneontology.org/amigo/term/GO:0055082	Calm1 Ckb Apoe Calb2 Slc1a3 Atp1a2 Atp2b1 Cartpt App Fth1 Dbi Atp2b4 Atp1b1 Ghrh Calb1 Mt3 Mt1 Agt Thy1 Atp1b2 Vsnl1
2.66861e-08	24	995	4.7989	Positive regulation of transport	http://amigo.geneontology.org/amigo/term/GO:0051050	Calm1 Apoe Slc1a2 Tenm1 Cadps2 Atp2b1 Cartpt Clu App Dbi Glul Atp1b1 Snap25 Ghrh Slc6a1 Plp1 Agt Thy1 Acsl3 Syt1 Cd81 Atp1b2 Vsnl1 Nnat
2.53943e-07	22	947	4.62196	Cellular homeostasis	http://amigo.geneontology.org/amigo/term/GO:0019725	Calm1 Ckb Apoe Calb2 Slc1a3 Atp1a2 Atp2b1 Cartpt App Fth1 Gaa Dbi Atp2b4 Atp1b1 Ghrh Calb1 Mt3 Mt1 Agt Thy1 Atp1b2 Vsnl1
2.304e-07	23	1029	4.44699	Secretion	http://amigo.geneontology.org/amigo/term/GO:0046903	Calm1 Apoe Psap Prlr Syn2 Ptgds Cadps2 Pomc Cartpt Rab3c Serpine2 Glul Snap25 Ghrh Slc6a1 Agt Acsl3 Syt1 Vgf Ildr2 Vsnl1 Unc13c Nnat
6.8879e-10	32	1496	4.25571	Cell-cell signaling	http://amigo.geneontology.org/amigo/term/GO:0007267	Calm1 Gabrg1 Apoe Calb2 Ndrg2 Slc1a3 Syn2 Cadps2 Pomc Cartpt Ly6h App Serpine2 Dbi Glul Snap25 Ghrh Calb1 Plpp3 Slc6a1 Agt Thy1 Syt1 Vgf Six3 Rbms3 Ildr2 Pnoc Nrgn Vsnl1 Unc13c Nnat
5.241e-14	47	2409	3.88164	Nervous system development	http://amigo.geneontology.org/amigo/term/GO:0007399	Ckb Apoe Psap Ndrg2 Bcan Prkacb Slc1a2 Slc1a3 Atp1a2 Tenm1 Ubb Atp2b1 Clmn Clu Alcam App Itm2c Serpine2 Dbi Atp2b4 Snap25 Cst3 Ghrh Serpini1 Plpp3 Slc6a11 Plp1 Mt3 Agt Thy1 Mobp Acsl3 Brinp3 Syt1 Dner Six3 Atp1b2 Mbp Gap43 Pcdh19 Nrgn Tubb2a Ntm mt-Co1 Nnat Ptprz1 Marcks
8.3859e-08	31	1765	3.49439	Neurogenesis	http://amigo.geneontology.org/amigo/term/GO:0022008	Apoe Psap Bcan Slc1a3 Tenm1 Ubb Clmn Clu Alcam App Itm2c Serpine2 Dbi Snap25 Serpini1 Plpp3 Plp1 Mt3 Agt Thy1 Mobp Acsl3 Brinp3 Syt1 Dner Six3 Atp1b2 Gap43 Tubb2a Ntm Ptprz1
3.46499e-07	30	1787	3.34003	Homeostatic process	http://amigo.geneontology.org/amigo/term/GO:0042592	Calm1 Ckb Apoe Calb2 Prlr Slc1a3 Atp1a2 Cadps2 Ubb Atp2b1 Pomc Cartpt App Fth1 Gaa Dbi Atp2b4 Atp1b1 Ghrh Calb1 Pde4b Mt3 Mt1 Agt Thy1 Vgf Ildr2 Atp1b2 Mbp Vsnl1
5.26293e-07	30	1841	3.24206	Regulation of transport	http://amigo.geneontology.org/amigo/term/GO:0051049	Calm1 Apoe Slc1a2 Atp1a2 Tenm1 Cadps2 Atp2b1 Pomc Cartpt Rab3c Clu App Serpine2 Dbi Atp2b4 Glul Atp1b1 Snap25 Ghrh Pde4b Slc6a1 Plp1 Agt Thy1 Acsl3 Syt1 Cd81 Atp1b2 Vsnl1 Nnat
7.63854e-13	56	3751	2.97026	Regulation of biological quality	http://amigo.geneontology.org/amigo/term/GO:0065008	Calm1 Gabrg1 Ckb Gria3 Apoe Calb2 Slc1a2 Prlr Slc1a3 Pgrmc1 Atp1a2 Syn2 Cadps2 Sparc Ubb Atp2b1 Ntsr2 Pomc Cartpt Clu App Fth1 Tac2 Gaa Serpine2 Dbi Atp2b4 Glul Atp1b1 Snap25 Ghrh Calb1 Plpp3 Pde4b Sparcl1 Slc6a11 Slc6a1 Rnf128 Mt3 Mt1 Agt Thy1 Syt1 Vgf Cd81 Ildr2 Atp1b2 Mbp Ncald Ptprt Nrgn Vsnl1 Gapdh Unc13c Nnat Tuba1a
5.18888e-07	38	2821	2.68	Regulation of localization	http://amigo.geneontology.org/amigo/term/GO:0032879	Calm1 Apoe Sst Slc1a2 Pgrmc1 Atp1a2 Tenm1 Cadps2 Sparc Atp2b1 Pomc Cartpt Rab3c Clu App Tac2 Serpine2 Dbi Atp2b4 Glul Atp1b1 Snap25 Ghrh Plpp3 Pde4b Slc6a1 Plp1 Agt Thy1 Acsl3 Syt1 Dpp10 Cd81 Atp1b2 Ptprt Vsnl1 Nnat Ptprz1
4.26202e-07	41	3194	2.55389	Regulation of signaling	http://amigo.geneontology.org/amigo/term/GO:0023051	Calm1 Gria3 Apoe Calb2 Psap Ndrg2 Prkacb Prlr Slc1a3 Ubb Ntsr2 Pomc Cartpt Clu Ly6h App Itm2c Serpine2 Dbi Atp2b4 Glul Snap25 Ghrh Calb1 Plpp3 Pde4b Slc6a1 Mt3 Agt Thy1 Syt1 Vgf Cd81 Six3 Rbms3 Scg2 Ptprt Nrgn Vsnl1 Unc13c Nnat
3.54079e-10	59	4822	2.43433	System development	http://amigo.geneontology.org/amigo/term/GO:0048731	Ckb Apoe Psap Ndrg2 Bcan Prkacb Slc1a2 Prlr Slc1a3 Atp1a2 Tenm1 Sparc Ubb Atp2b1 Clmn Cartpt Clu Alcam App Gaa Itm2c Serpine2 Dbi Atp2b4 Glul Snap25 Cst3 Ghrh Serpini1 Calb1 Plpp3 Slc6a11 Plp1 Mt3 Agt Thy1 Mobp Acsl3 Foxn3 Brinp3 Syt1 Dner Vgf Cd81 Six3 Ildr2 Atp1b2 Mbp Asb4 Gap43 Scg2 Pcdh19 Nrgn Tubb2a Ntm mt-Co1 Nnat Ptprz1 Marcks
2.15199e-07	50	4348	2.28789	Transport	http://amigo.geneontology.org/amigo/term/GO:0006810	Calm1 Gabrg1 Gria3 Apoe Psap Slc1a2 Prlr Slc1a3 Atp1a2 Syn2 Ptgds Tenm1 Cadps2 Ubb Atp2b1 Pomc Clmn Cartpt Rab3c Clu App Fth1 Serpine2 Dbi Atp2b4 Glul Atp1b1 Snap25 Ghrh Plpp3 Pde4b Slc6a11 Slc6a1 Ttyh1 Plp1 Mt3 Agt Thy1 Acsl3 Syt1 Vgf Cd81 Six3 Ildr2 Atp1b2 Lrp1b Vsnl1 Unc13c mt-Co1 Nnat
4.46588e-07	50	4504	2.20864	Establishment of localization	http://amigo.geneontology.org/amigo/term/GO:0051234	Calm1 Gabrg1 Gria3 Apoe Psap Slc1a2 Prlr Slc1a3 Atp1a2 Syn2 Ptgds Tenm1 Cadps2 Ubb Atp2b1 Pomc Clmn Cartpt Rab3c Clu App Fth1 Serpine2 Dbi Atp2b4 Glul Atp1b1 Snap25 Ghrh Plpp3 Pde4b Slc6a11 Slc6a1 Ttyh1 Plp1 Mt3 Agt Thy1 Acsl3 Syt1 Vgf Cd81 Six3 Ildr2 Atp1b2 Lrp1b Vsnl1 Unc13c mt-Co1 Nnat

## Sheet: ShinyGo 0.75 - GO Molec Funct
Enrichment FDR	nGenes	Pathway Genes	Fold Enrichment	Pathway	URL	Genes
0.000546414	2	2	198.955	Calcium ion binding involved in regulation of cytosolic calcium ion concentration	http://amigo.geneontology.org/amigo/term/GO:0099510	Calb2 Calb1
0.000546414	2	2	198.955	Calcium ion binding involved in regulation of presynaptic cytosolic calcium ion concentration	http://amigo.geneontology.org/amigo/term/GO:0099534	Calb2 Calb1
0.000318535	3	9	66.3182	P-type sodium:potassium-exchanging transporter activity	http://amigo.geneontology.org/amigo/term/GO:0005391	Atp1a2 Atp1b1 Atp1b2
0.000318535	3	9	66.3182	P-type sodium transporter activity	http://amigo.geneontology.org/amigo/term/GO:0008554	Atp1a2 Atp1b1 Atp1b2
0.000362706	3	10	59.6864	Structural constituent of myelin sheath	http://amigo.geneontology.org/amigo/term/GO:0019911	Plp1 Mobp Mbp
4.87e-05	4	14	56.8442	Amino acid:sodium symporter activity	http://amigo.geneontology.org/amigo/term/GO:0005283	Slc1a2 Slc1a3 Slc6a11 Slc6a1
0.000473233	3	11	54.2603	P-type potassium transmembrane transporter activity	http://amigo.geneontology.org/amigo/term/GO:0008556	Atp1a2 Atp1b1 Atp1b2
0.000109876	4	18	44.2121	Amino acid:cation symporter activity	http://amigo.geneontology.org/amigo/term/GO:0005416	Slc1a2 Slc1a3 Slc6a11 Slc6a1
4.74e-05	5	30	33.1591	P-type ion transporter activity	http://amigo.geneontology.org/amigo/term/GO:0015662	Atp1a2 Atp2b1 Atp2b4 Atp1b1 Atp1b2
4.74e-05	5	30	33.1591	P-type transmembrane transporter activity	http://amigo.geneontology.org/amigo/term/GO:0140358	Atp1a2 Atp2b1 Atp2b4 Atp1b1 Atp1b2
0.000318535	4	27	29.4747	Organic acid:sodium symporter activity	http://amigo.geneontology.org/amigo/term/GO:0005343	Slc1a2 Slc1a3 Slc6a11 Slc6a1
0.000318535	5	55	18.0868	ATPase-coupled cation transmembrane transporter activity	http://amigo.geneontology.org/amigo/term/GO:0019829	Atp1a2 Atp2b1 Atp2b4 Atp1b1 Atp1b2
0.000338959	5	60	16.5795	Amyloid-beta binding	http://amigo.geneontology.org/amigo/term/GO:0001540	Gria3 Apoe Clu Itm2c Cst3
0.000248901	7	135	10.3162	Sodium ion transmembrane transporter activity	http://amigo.geneontology.org/amigo/term/GO:0015081	Slc1a2 Slc1a3 Atp1a2 Atp1b1 Slc6a11 Slc6a1 Atp1b2
0.00102379	6	132	9.04339	Hormone activity	http://amigo.geneontology.org/amigo/term/GO:0005179	Sst Pomc Cartpt Ghrh Agt Vgf
0.000226613	8	183	8.69747	Calmodulin binding	http://amigo.geneontology.org/amigo/term/GO:0005516	Atp2b1 Atp2b4 Syt1 Mbp Gap43 Nrgn Unc13c Marcks
0.000248888	8	188	8.46615	Primary active transmembrane transporter activity	http://amigo.geneontology.org/amigo/term/GO:0015399	Atp1a2 Atp2b1 Atp2b4 Atp1b1 Atp1b2 mt-Nd1 mt-Nd2 mt-Co1
4.87e-05	10	250	7.95818	Active ion transmembrane transporter activity	http://amigo.geneontology.org/amigo/term/GO:0022853	Slc1a2 Slc1a3 Atp1a2 Atp2b1 Atp2b4 Atp1b1 Slc6a11 Slc6a1 Atp1b2 mt-Co1
6.94e-05	12	406	5.88043	Active transmembrane transporter activity	http://amigo.geneontology.org/amigo/term/GO:0022804	Slc1a2 Slc1a3 Atp1a2 Atp2b1 Atp2b4 Atp1b1 Slc6a11 Slc6a1 Atp1b2 mt-Nd1 mt-Nd2 mt-Co1
6.04e-07	19	709	5.33165	Calcium ion binding	http://amigo.geneontology.org/amigo/term/GO:0005509	Calm1 Calb2 Bcan Sparc Calb1 Sparcl1 Ttyh1 Edil3 Pcdh11x Syt1 Dner Pcdh10 Lrp1b Pcdh19 Ncald Vsnl1 Unc13c Tubb4a Hpcal1
0.000850948	10	412	4.82899	Metal ion transmembrane transporter activity	http://amigo.geneontology.org/amigo/term/GO:0046873	Slc1a2 Slc1a3 Atp1a2 Atp2b1 Atp2b4 Atp1b1 Snap25 Slc6a11 Slc6a1 Atp1b2
0.000660552	12	573	4.16659	Inorganic cation transmembrane transporter activity	http://amigo.geneontology.org/amigo/term/GO:0022890	Gria3 Slc1a2 Slc1a3 Atp1a2 Atp2b1 Atp2b4 Atp1b1 Snap25 Slc6a11 Slc6a1 Atp1b2 mt-Co1
0.000338959	14	703	3.96211	Inorganic molecular entity transmembrane transporter activity	http://amigo.geneontology.org/amigo/term/GO:0015318	Gabrg1 Gria3 Slc1a2 Slc1a3 Atp1a2 Atp2b1 Atp2b4 Atp1b1 Snap25 Slc6a11 Slc6a1 Ttyh1 Atp1b2 mt-Co1
0.00125707	12	625	3.81993	Cation transmembrane transporter activity	http://amigo.geneontology.org/amigo/term/GO:0008324	Gria3 Slc1a2 Slc1a3 Atp1a2 Atp2b1 Atp2b4 Atp1b1 Snap25 Slc6a11 Slc6a1 Atp1b2 mt-Co1
4.66e-07	28	1502	3.70887	Signaling receptor binding	http://amigo.geneontology.org/amigo/term/GO:0005102	Calm1 Gabrg1 Apoe Psap Sst Prlr Pomc Cartpt Clu Ly6h App Tac2 Serpine2 Dbi Ghrh Plpp3 Agt Thy1 Syt1 Dner Vgf Cd81 Six3 Bex2 Pnoc Scg2 mt-Nd2 Ptprz1
0.000801914	14	786	3.54372	Lipid binding	http://amigo.geneontology.org/amigo/term/GO:0008289	Apoe Psap Pgrmc1 Atp1a2 Ptgds Cadps2 Dbi Calb1 Thy1 Syt1 Cd81 Gap43 Nrgn Unc13c
0.00114443	14	821	3.39265	Ion transmembrane transporter activity	http://amigo.geneontology.org/amigo/term/GO:0015075	Gabrg1 Gria3 Slc1a2 Slc1a3 Atp1a2 Atp2b1 Atp2b4 Atp1b1 Snap25 Slc6a11 Slc6a1 Ttyh1 Atp1b2 mt-Co1
0.00125707	17	1172	2.88586	Transporter activity	http://amigo.geneontology.org/amigo/term/GO:0005215	Gabrg1 Gria3 Apoe Slc1a2 Slc1a3 Atp1a2 Atp2b1 Atp2b4 Atp1b1 Snap25 Slc6a11 Slc6a1 Ttyh1 Atp1b2 mt-Nd1 mt-Nd2 mt-Co1
0.000287475	40	4040	1.96985	Metal ion binding	http://amigo.geneontology.org/amigo/term/GO:0046872	Calm1 Apoe Calb2 Bcan Prkacb Slc1a2 Prlr Slc1a3 Pgrmc1 Atp1a2 Cadps2 Sparc Atp2b1 App Fth1 Ecel1 Atp2b4 Glul Calb1 Pde4b Sparcl1 Slc6a1 Ttyh1 Rnf128 Mt3 Mt1 Edil3 Pcdh11x Syt1 Dner Pcdh10 Lrp1b Pcdh19 Ncald Vsnl1 Gda Unc13c Tubb4a mt-Co1 Hpcal1
0.000338959	40	4136	1.92413	Cation binding	http://amigo.geneontology.org/amigo/term/GO:0043169	Calm1 Apoe Calb2 Bcan Prkacb Slc1a2 Prlr Slc1a3 Pgrmc1 Atp1a2 Cadps2 Sparc Atp2b1 App Fth1 Ecel1 Atp2b4 Glul Calb1 Pde4b Sparcl1 Slc6a1 Ttyh1 Rnf128 Mt3 Mt1 Edil3 Pcdh11x Syt1 Dner Pcdh10 Lrp1b Pcdh19 Ncald Vsnl1 Gda Unc13c Tubb4a mt-Co1 Hpcal1

## Sheet: ShinyGo 0.75 - KEGG
Enrichment FDR	nGenes	Pathway Genes	Fold Enrichment	Pathway	URL	Genes
0.0171633	2	22	26.8857	Proximal tubule bicarbonate reclamation	http://www.genome.jp/kegg-bin/show_pathway?mmu04964	Atp1b1 Atp1b2
5.78572e-05	5	61	24.2412	Endocrine and other factor-regulated calcium reabsorption	http://www.genome.jp/kegg-bin/show_pathway?mmu04961	Prkacb Atp2b1 Atp1b1 Calb1 Atp1b2
1.39438e-05	6	77	23.0449	Synaptic vesicle cycle	http://www.genome.jp/kegg-bin/show_pathway?mmu04721	Slc1a2 Slc1a3 Snap25 Slc6a11 Syt1 Unc13c
4.93935e-05	6	102	17.3967	Aldosterone synthesis and secretion	http://www.genome.jp/kegg-bin/show_pathway?mmu04925	Prkacb Atp2b1 Pomc Atp1b1 Agt Atp1b2
0.000239623	5	85	17.3967	Salivary secretion	http://www.genome.jp/kegg-bin/show_pathway?mmu04970	Prkacb Atp2b1 Atp1b1 Cst3 Atp1b2
0.00731945	3	54	16.4302	Mineral absorption	http://www.genome.jp/kegg-bin/show_pathway?mmu04978	Atp2b1 Atp1b1 Atp1b2
0.00178521	4	74	15.9861	Thyroid hormone synthesis	http://www.genome.jp/kegg-bin/show_pathway?mmu04918	Prkacb Atp1a2 Atp1b1 Atp1b2
0.00178521	4	75	15.773	Gastric acid secretion	http://www.genome.jp/kegg-bin/show_pathway?mmu04971	Sst Prkacb Atp1b1 Atp1b2
0.00242623	4	86	13.7555	Insulin secretion	http://www.genome.jp/kegg-bin/show_pathway?mmu04911	Prkacb Atp1b1 Snap25 Atp1b2
0.000794014	5	113	13.086	Glutamatergic synapse	http://www.genome.jp/kegg-bin/show_pathway?mmu04724	Gria3 Prkacb Slc1a2 Slc1a3 Glul
0.0146032	3	72	12.3226	Cortisol synthesis and secretion	http://www.genome.jp/kegg-bin/show_pathway?mmu04927	Prkacb Pomc Agt
5.80684e-06	9	217	12.2658	CAMP signaling pathway	http://www.genome.jp/kegg-bin/show_pathway?mmu04024	Gria3 Sst Prkacb Atp1a2 Atp2b1 Pomc Atp1b1 Pde4b Atp1b2
0.00553475	4	112	10.5623	Pancreatic secretion	http://www.genome.jp/kegg-bin/show_pathway?mmu04972	Atp1a2 Atp2b1 Atp1b1 Atp1b2
0.019126	3	86	10.3166	Gap junction	http://www.genome.jp/kegg-bin/show_pathway?mmu04540	Prkacb Tubb2a Tuba1a
0.0200172	3	89	9.96887	GABAergic synapse	http://www.genome.jp/kegg-bin/show_pathway?mmu04727	Prkacb Glul Slc6a11
0.00196267	5	149	9.92427	Adrenergic signaling in cardiomyocytes	http://www.genome.jp/kegg-bin/show_pathway?mmu04261	Prkacb Atp2b1 Atp1b1 Agt Atp1b2
0.0175912	4	171	6.91797	CGMP-PKG signaling pathway	http://www.genome.jp/kegg-bin/show_pathway?mmu04022	Atp1a2 Atp2b1 Atp1b1 Atp1b2
0.00553475	6	300	5.91486	Huntington disease	http://www.genome.jp/kegg-bin/show_pathway?mmu05016	Gria3 Slc1a2 Slc1a3 Tubb2a mt-Nd2 Tuba1a
0.0152017	5	266	5.55908	Prion disease	http://www.genome.jp/kegg-bin/show_pathway?mmu05020	Prkacb Ncam1 Tubb2a mt-Nd2 Tuba1a
0.0146032	6	380	4.66963	Alzheimer disease	http://www.genome.jp/kegg-bin/show_pathway?mmu05010	Apoe App Gapdh Tubb2a mt-Nd2 Tuba1a

## Sheet: ShinyGo 0.75 - Reactome
Enrichment FDR	nGenes	Pathway Genes	Fold Enrichment	Pathway	URL	Genes
5.58e-06	3	4	221.807	Neurotransmitter uptake and metabolism In glial cells	https://reactome.org/download/current	Slc1a2 Slc1a3 Glul
5.58e-06	3	4	221.807	Astrocytic Glutamate-Glutamine Uptake And Metabolism	https://reactome.org/download/current	Slc1a2 Slc1a3 Glul
4.08e-05	4	25	47.3189	Glutamate Neurotransmitter Release Cycle	https://reactome.org/download/current	Slc1a2 Slc1a3 Snap25 Syt1
0.000611588	3	19	46.6963	Serotonin Neurotransmitter Release Cycle	https://reactome.org/download/current	Syn2 Snap25 Syt1
0.000611588	3	20	44.3615	GABA synthesis release reuptake and degradation	https://reactome.org/download/current	Snap25 Slc6a11 Syt1
0.000948821	3	24	36.9679	Dopamine Neurotransmitter Release Cycle	https://reactome.org/download/current	Syn2 Snap25 Syt1
2.19e-06	6	51	34.7933	Neurotransmitter release cycle	https://reactome.org/download/current	Slc1a2 Slc1a3 Syn2 Snap25 Slc6a11 Syt1
0.000548198	4	51	23.1955	Ion homeostasis	https://reactome.org/download/current	Atp1a2 Atp2b1 Atp1b1 Atp1b2
0.000611588	4	56	21.1245	Ion transport by P-type ATPases	https://reactome.org/download/current	Atp1a2 Atp2b1 Atp1b1 Atp1b2
5.58e-06	7	112	18.484	Post-translational protein phosphorylation	https://reactome.org/download/current	Apoe App Chgb Cst3 Sparcl1 Vgf Scg2
5.58e-06	7	118	17.5441	Regulation of Insulin-like Growth Factor IGF transport and uptake by Insulin-like Growth Factor Binding Proteins IGFBPs	https://reactome.org/download/current	Apoe App Chgb Cst3 Sparcl1 Vgf Scg2
5.57e-07	10	212	13.9502	Transmission across Chemical Synapses	https://reactome.org/download/current	Gria3 Slc1a2 Slc1a3 Syn2 Glul Snap25 Slc6a11 Syt1 Ncald Nrgn
0.000931264	5	125	11.8297	Platelet degranulation	https://reactome.org/download/current	Psap Itih3 Sparc Clu App
0.000997169	5	130	11.3747	Response to elevated platelet cytosolic Ca2+	https://reactome.org/download/current	Psap Itih3 Sparc Clu App
0.000112979	7	196	10.5623	Peptide ligand-binding receptors	https://reactome.org/download/current	Psap Sst Pomc App Tac2 Agt Pnoc
7.09e-06	10	341	8.67282	Neuronal System	https://reactome.org/download/current	Gria3 Slc1a2 Slc1a3 Syn2 Glul Snap25 Slc6a11 Syt1 Ncald Nrgn
0.00399235	5	179	8.26098	Ion channel transport	https://reactome.org/download/current	Atp1a2 Atp2b1 Atp1b1 Ttyh1 Atp1b2
0.0012144	7	319	6.48966	Class A/1 Rhodopsin-like receptors	https://reactome.org/download/current	Psap Sst Pomc App Tac2 Agt Pnoc
0.000611588	8	376	6.29241	G alpha i signalling events	https://reactome.org/download/current	Apoe Psap Sst Pomc App Pde4b Agt Pnoc
0.00013435	11	608	5.35062	Hemostasis	https://reactome.org/download/current	Psap Itih3 Sparc Atp2b1 Clu App Serpine2 Atp1b1 Atp1b2 Tubb2a Tuba1a

## Sheet: ShinyGo 0.75 - Biocarta
Enrichment FDR	nGenes	Pathway Genes	Fold Enrichment	Pathway	URL	Genes
0.0389545	2	20	29.5743	NOS1 PATHWAY	http://www.whichgenes.org/api/sources/musmusculus_BiocartaPathway/	Prkacb Syt1
0.0389545	2	26	22.7495	VIP PATHWAY	http://www.whichgenes.org/api/sources/musmusculus_BiocartaPathway/	Prkacb Syt1
0.0389545	2	27	21.9069	NO1 PATHWAY	http://www.whichgenes.org/api/sources/musmusculus_BiocartaPathway/	Prkacb Syt1
0.0389545	2	32	18.484	AT1R PATHWAY	http://www.whichgenes.org/api/sources/musmusculus_BiocartaPathway/	Agt Syt1
0.0389545	2	33	17.9238	GPCR PATHWAY	http://www.whichgenes.org/api/sources/musmusculus_BiocartaPathway/	Prkacb Syt1
0.0272537	3	50	17.7446	NFAT PATHWAY	http://www.whichgenes.org/api/sources/musmusculus_BiocartaPathway/	Prkacb Agt Syt1
0.0417509	2	37	15.9861	BIOPEPTIDES PATHWAY	http://www.whichgenes.org/api/sources/musmusculus_BiocartaPathway/	Agt Syt1
