# Supplementary material for: Cell-specific transcriptome changes in the hypothalamic arcuate nucleus in a mouse deoxycorticosterone acetate-salt model of hypertension
Source: Front Cell Neurosci. 2023 May 24;17:1207350. doi: 10.3389/fncel.2023.1207350 (PMC10244568; doi:10.3389/fncel.2023.1207350)
Supplement: Supplementary file 6 [file Data_Sheet_6.XLSX]

## Sheet: ShinyGo 0.75 - GO Bio Process
Table S11 - N_SC0 vs N_SC9 Enrichment Results
Enrichment FDR	nGenes	Pathway Genes	Fold Enrichment	Pathway	URL	Genes
3.25504e-09	25	738	5.45119	Synaptic signaling	http://amigo.geneontology.org/amigo/term/GO:0099536	Gabrg1 Calb2 Hap1 Syn2 Cadps2 Cacng4 Cartpt Fam107a Il1rap Ly6h Ptprd Slc6a1 Rgs10 Sorbs2 Agt Cadm1 Cspg5 Ppp1r9a Vgf Pnoc Sv2c Nrgn Unc13c Nrxn3 Syne1
1.22144e-07	22	707	5.00738	Trans-synaptic signaling	http://amigo.geneontology.org/amigo/term/GO:0099537	Gabrg1 Calb2 Hap1 Syn2 Cadps2 Cacng4 Cartpt Fam107a Il1rap Ptprd Slc6a1 Agt Cadm1 Cspg5 Ppp1r9a Vgf Pnoc Sv2c Nrgn Unc13c Nrxn3 Syne1
1.32552e-06	20	675	4.76797	Cell projection morphogenesis	http://amigo.geneontology.org/amigo/term/GO:0048858	Sema6a Clu Alcam Dst Nfasc Ptprd Epha5 Auts2 Chl1 Thy1 Cspg5 Ppp1r9a Rreb1 Isl1 Dmd Plxnb1 Col25a1 Tubb3 Ptprz1 Syne1
2.02154e-06	20	699	4.60427	Anterograde trans-synaptic signaling	http://amigo.geneontology.org/amigo/term/GO:0098916	Gabrg1 Calb2 Hap1 Syn2 Cadps2 Cacng4 Cartpt Fam107a Ptprd Slc6a1 Agt Cspg5 Ppp1r9a Vgf Pnoc Sv2c Nrgn Unc13c Nrxn3 Syne1
2.02154e-06	20	699	4.60427	Chemical synaptic transmission	http://amigo.geneontology.org/amigo/term/GO:0007268	Gabrg1 Calb2 Hap1 Syn2 Cadps2 Cacng4 Cartpt Fam107a Ptprd Slc6a1 Agt Cspg5 Ppp1r9a Vgf Pnoc Sv2c Nrgn Unc13c Nrxn3 Syne1
2.16786e-06	20	704	4.57157	Cell part morphogenesis	http://amigo.geneontology.org/amigo/term/GO:0032990	Sema6a Clu Alcam Dst Nfasc Ptprd Epha5 Auts2 Chl1 Thy1 Cspg5 Ppp1r9a Rreb1 Isl1 Dmd Plxnb1 Col25a1 Tubb3 Ptprz1 Syne1
4.64856e-06	19	670	4.56338	Plasma membrane bounded cell projection morphogenesis	http://amigo.geneontology.org/amigo/term/GO:0120039	Sema6a Clu Alcam Dst Nfasc Ptprd Epha5 Auts2 Chl1 Thy1 Ppp1r9a Rreb1 Isl1 Dmd Plxnb1 Col25a1 Tubb3 Ptprz1 Syne1
1.53945e-05	18	656	4.41546	Neuron projection morphogenesis	http://amigo.geneontology.org/amigo/term/GO:0048812	Sema6a Clu Alcam Dst Nfasc Ptprd Epha5 Auts2 Chl1 Thy1 Ppp1r9a Isl1 Dmd Plxnb1 Col25a1 Tubb3 Ptprz1 Syne1
3.54214e-07	24	905	4.26747	Export from cell	http://amigo.geneontology.org/amigo/term/GO:0140352	Hap1 Atp1a2 Syn2 Ptgds Cadps2 Atp2b1 Chga Cartpt Ptprn Atp1b1 Frmd4a Gnas Pex5l Epha5 Agt Cspg5 Ppp1r9a Lgi3 Vgf Ildr2 Atp1b2 Isl1 Unc13c Nrxn3
1.77251e-05	19	739	4.1373	Cell junction organization	http://amigo.geneontology.org/amigo/term/GO:0034330	Ptprk Fam107a Il1rap Dst Nfasc Ptprd Epha5 Slc6a1 Arhgap6 Sorbs2 Agt Thy1 Cadm1 Ppp1r9a Camkv Ptprt Plxnb1 Unc13c Nrxn3
4.46266e-10	35	1362	4.13522	Cell adhesion	http://amigo.geneontology.org/amigo/term/GO:0007155	Tenm1 Sema6a Ptprk Fam107a Il1rap Alcam Tmem47 Dst Nfasc Atp1b1 Gnas Serpini1 Ptprd Pcdh7 Epha5 Chl1 Arhgap6 Thy1 Cadm1 Cspg5 Edil3 Pcdh11x Cd81 Rreb1 Ncam1 Atp1b2 Dmd Pcdh10 Pcdh19 Ptprt Plxnb1 Ntm Cadm2 Nrxn3 Ptprz1
4.46266e-10	35	1374	4.0991	Biological adhesion	http://amigo.geneontology.org/amigo/term/GO:0022610	Tenm1 Sema6a Ptprk Fam107a Il1rap Alcam Tmem47 Dst Nfasc Atp1b1 Gnas Serpini1 Ptprd Pcdh7 Epha5 Chl1 Arhgap6 Thy1 Cadm1 Cspg5 Edil3 Pcdh11x Cd81 Rreb1 Ncam1 Atp1b2 Dmd Pcdh10 Pcdh19 Ptprt Plxnb1 Ntm Cadm2 Nrxn3 Ptprz1
1.14154e-07	27	1064	4.08347	Neuron projection development	http://amigo.geneontology.org/amigo/term/GO:0031175	Hap1 Sema6a Ptprk Clmn Clu Il1rap Alcam Dst Nfasc Serpini1 Ptprd Epha5 Auts2 Chl1 Plp1 Agt Thy1 Ppp1r9a Atp1b2 Isl1 Dmd Plxnb1 Col25a1 Ntm Tubb3 Ptprz1 Syne1
1.16238e-05	20	792	4.06361	Cellular component morphogenesis	http://amigo.geneontology.org/amigo/term/GO:0032989	Sema6a Clu Alcam Dst Nfasc Ptprd Epha5 Auts2 Chl1 Thy1 Cspg5 Ppp1r9a Rreb1 Isl1 Dmd Plxnb1 Col25a1 Tubb3 Ptprz1 Syne1
2.69752e-07	28	1206	3.7361	Neuron development	http://amigo.geneontology.org/amigo/term/GO:0048666	Hap1 Tenm1 Sema6a Ptprk Clmn Clu Il1rap Alcam Dst Nfasc Serpini1 Ptprd Epha5 Auts2 Chl1 Plp1 Agt Thy1 Ppp1r9a Atp1b2 Isl1 Dmd Plxnb1 Col25a1 Ntm Tubb3 Ptprz1 Syne1
6.18954e-06	23	995	3.71974	Positive regulation of transport	http://amigo.geneontology.org/amigo/term/GO:0051050	Hap1 Tenm1 Cadps2 Atp2b1 Cacng4 Cartpt Clu Bin1 Atp1b1 Frmd4a Gnas Pex5l Slc6a1 Plp1 Agt Thy1 Acsl3 Cd81 Cacna2d1 Atp1b2 Isl1 Dmd Syne1
1.46406e-08	34	1496	3.65725	Cell-cell signaling	http://amigo.geneontology.org/amigo/term/GO:0007267	Gabrg1 Calb2 Hap1 Syn2 Cadps2 Cacng4 Chga Cartpt Fam107a Il1rap Ly6h Ptprn Gnas Pex5l Ptprd Epha5 Slc6a1 Rgs10 Sorbs2 Agt Thy1 Cadm1 Cspg5 Ppp1r9a Vgf Cacna2d1 Ildr2 Isl1 Pnoc Sv2c Nrgn Unc13c Nrxn3 Syne1
3.13053e-08	33	1470	3.61247	Neuron differentiation	http://amigo.geneontology.org/amigo/term/GO:0030182	Hap1 Tenm1 Sema6a Ptprk Clmn Otp Clu Il1rap Alcam Bin1 Dst Nfasc Serpini1 Ptprd Epha5 Auts2 Chl1 Plp1 Agt Thy1 Ppp1r9a Acsl3 Brinp3 Atp1b2 Isl1 Dmd Tcf4 Plxnb1 Col25a1 Ntm Tubb3 Ptprz1 Syne1
8.68997e-08	34	1627	3.36278	Generation of neurons	http://amigo.geneontology.org/amigo/term/GO:0048699	Hap1 Sirt2 Tenm1 Sema6a Ptprk Clmn Otp Clu Il1rap Alcam Bin1 Dst Nfasc Serpini1 Ptprd Epha5 Auts2 Chl1 Plp1 Agt Thy1 Ppp1r9a Acsl3 Brinp3 Atp1b2 Isl1 Dmd Tcf4 Plxnb1 Col25a1 Ntm Tubb3 Ptprz1 Syne1
1.22144e-07	35	1765	3.19103	Neurogenesis	http://amigo.geneontology.org/amigo/term/GO:0022008	Hap1 Sirt2 Tenm1 Sema6a Ptprk Clmn Otp Clu Il1rap Alcam Bin1 Dst Nfasc Serpini1 Ptprd Epha5 Auts2 Chl1 Plp1 Agt Thy1 Cspg5 Ppp1r9a Acsl3 Brinp3 Atp1b2 Isl1 Dmd Tcf4 Plxnb1 Col25a1 Ntm Tubb3 Ptprz1 Syne1
1.14154e-07	36	1841	3.14671	Regulation of transport	http://amigo.geneontology.org/amigo/term/GO:0051049	Hap1 Atp1a2 Sirt2 Tenm1 Cadps2 Atp2b1 Cacng4 Chga Cartpt Clu Bin1 Atp2b4 Atp1b1 Frmd4a Abca2 Gnas Pex5l Epha5 Slc6a1 Plp1 Agt Thy1 Cspg5 Ppp1r9a Acsl3 Lgi3 Ogt Cd81 Cacna2d1 Atp1b2 Isl1 Dmd Camk2d Nrxn3 Scn9a Syne1
4.46266e-10	47	2409	3.13956	Nervous system development	http://amigo.geneontology.org/amigo/term/GO:0007399	Hap1 Atp1a2 Sirt2 Tenm1 Sema6a Ptprk Atp2b1 Clmn Otp Clu Slc38a2 Il1rap Alcam Bin1 Dst Nfasc Atp2b4 Pcsk2 Serpini1 Ptprd Epha5 Auts2 Chl1 Slc6a11 Plp1 Agt Thy1 Cadm1 Cspg5 Ppp1r9a Acsl3 Brinp3 Slc32a1 Atp1b2 Isl1 Dmd Pcdh19 Nrgn Tcf4 Plxnb1 Col25a1 Ntm Tubb3 Nrxn3 Ptprz1 Fnbp1 Syne1
1.12881e-05	29	1570	2.97239	Cell projection organization	http://amigo.geneontology.org/amigo/term/GO:0030030	Hap1 Sema6a Ptprk Clmn Clu Il1rap Alcam Dst Nfasc Serpini1 Ptprd Epha5 Auts2 Chl1 Plp1 Agt Thy1 Cspg5 Ppp1r9a Rreb1 Atp1b2 Isl1 Dmd Plxnb1 Col25a1 Ntm Tubb3 Ptprz1 Syne1
2.09423e-05	28	1531	2.943	Plasma membrane bounded cell projection organization	http://amigo.geneontology.org/amigo/term/GO:0120036	Hap1 Sema6a Ptprk Clmn Clu Il1rap Alcam Dst Nfasc Serpini1 Ptprd Epha5 Auts2 Chl1 Plp1 Agt Thy1 Ppp1r9a Rreb1 Atp1b2 Isl1 Dmd Plxnb1 Col25a1 Ntm Tubb3 Ptprz1 Syne1
8.42318e-07	39	2322	2.70278	Cell development	http://amigo.geneontology.org/amigo/term/GO:0048468	Hap1 Sirt2 Tenm1 Sema6a Ptprk Clmn 4930447C04Rik Otp Clu Il1rap Alcam Bin1 Paqr8 Dst Nfasc Serpini1 Col11a1 Ptprd Epha5 Auts2 Chl1 Plp1 Sorbs2 Agt Thy1 Cspg5 Ppp1r9a Rreb1 Atp1b2 Isl1 Dmd Plxnb1 Camk2d Col25a1 Ntm Tubb3 Ptprz1 Msi2 Syne1
3.13053e-08	47	2821	2.68103	Regulation of localization	http://amigo.geneontology.org/amigo/term/GO:0032879	Sst Hap1 Atp1a2 Sirt2 Tenm1 Cadps2 Sema6a Ptprk Atp2b1 Cacng4 Chga Cartpt Fam107a Clu Bin1 Atp2b4 Atp1b1 Frmd4a Abca2 Gnas Pex5l Epha5 Slc6a1 Plp1 Sorbs2 Agt Thy1 Cspg5 Ppp1r9a Acsl3 Lgi3 Ogt Dpp10 Cd81 Dock10 Rreb1 Cacna2d1 Atp1b2 Isl1 Dmd Ptprt Plxnb1 Camk2d Nrxn3 Ptprz1 Scn9a Syne1
2.69752e-07	53	3751	2.27372	Regulation of biological quality	http://amigo.geneontology.org/amigo/term/GO:0065008	Gabrg1 Gria3 Calb2 Hap1 Atp1a2 Syn2 Sirt2 Cadps2 Sema6a Atp2b1 Cacng4 Chga Cartpt Fam107a Clu Il1rap Bin1 Cdc37l1 Ptprn Atp2b4 Atp1b1 Gad2 Abca2 Pcsk2 Gnas Pex5l Ptprd Epha5 Slc6a11 Slc6a1 Rnf128 Agt Thy1 Cspg5 Ppp1r9a Camkv Ogt Vgf Cd81 Cacna2d1 Ildr2 Atp1b2 Isl1 Dmd Ncald Ptprt Nrgn Plxnb1 Camk2d Unc13c Nrxn3 Scn9a Syne1
1.70072e-06	56	4348	2.07256	Transport	http://amigo.geneontology.org/amigo/term/GO:0006810	Gabrg1 Gria3 Hap1 Atp1a2 Syn2 Ptgds Sirt2 Tenm1 Cadps2 Atp2b1 Cacng4 Clmn Chga Cartpt Clu Slc38a2 Bin1 Dst Ptprn Atp2b4 Atp1b1 Frmd4a Abca2 Rrbp1 Gnas Pex5l Epha5 Slc6a11 Slc6a1 Plp1 Agt Thy1 Cspg5 Ppp1r9a Acsl3 Lgi3 Gria2 Ogt Vgf Cd81 Slc32a1 Cacna2d1 Ildr2 Elmo1 Atp1b2 Grk3 Isl1 Dmd Lrp1b Sv2c Camk2d Unc13c Nrxn3 Scn9a Fnbp1 Syne1
4.64856e-06	56	4504	2.00077	Establishment of localization	http://amigo.geneontology.org/amigo/term/GO:0051234	Gabrg1 Gria3 Hap1 Atp1a2 Syn2 Ptgds Sirt2 Tenm1 Cadps2 Atp2b1 Cacng4 Clmn Chga Cartpt Clu Slc38a2 Bin1 Dst Ptprn Atp2b4 Atp1b1 Frmd4a Abca2 Rrbp1 Gnas Pex5l Epha5 Slc6a11 Slc6a1 Plp1 Agt Thy1 Cspg5 Ppp1r9a Acsl3 Lgi3 Gria2 Ogt Vgf Cd81 Slc32a1 Cacna2d1 Ildr2 Elmo1 Atp1b2 Grk3 Isl1 Dmd Lrp1b Sv2c Camk2d Unc13c Nrxn3 Scn9a Fnbp1 Syne1
3.00071e-06	59	4822	1.96894	System development	http://amigo.geneontology.org/amigo/term/GO:0048731	Hap1 Atp1a2 Sirt2 Tenm1 Sema6a Ptprk Atp2b1 Clmn Cartpt Otp Clu Slc38a2 Il1rap Alcam Bin1 Dst Nfasc Atp2b4 Pcsk2 Gnas Serpini1 Col11a1 Ptprd Epha5 Auts2 Chl1 Slc6a11 Plp1 Sorbs2 Agt Thy1 Cadm1 Cspg5 Ppp1r9a Acsl3 Foxn3 Brinp3 Vgf Cd81 Slc32a1 Rreb1 Ildr2 Atp1b2 Isl1 Asb4 Dmd Scg2 Pcdh19 Nrgn Tcf4 Plxnb1 Camk2d Col25a1 Ntm Tubb3 Nrxn3 Ptprz1 Fnbp1 Syne1

## Sheet: ShinyGo 0.75 - GO Molec Funct
Enrichment FDR	nGenes	Pathway Genes	Fold Enrichment	Pathway	URL	Genes
0.00486515	2	4	80.4596	Gamma-aminobutyric acid:sodium symporter activity	http://amigo.geneontology.org/amigo/term/GO:0005332	Slc6a11 Slc6a1
0.000782534	3	7	68.9653	Gamma-aminobutyric acid transmembrane transporter activity	http://amigo.geneontology.org/amigo/term/GO:0015185	Slc6a11 Slc6a1 Slc32a1
0.00113164	3	9	53.6397	P-type sodium:potassium-exchanging transporter activity	http://amigo.geneontology.org/amigo/term/GO:0005391	Atp1a2 Atp1b1 Atp1b2
0.00113164	3	9	53.6397	P-type sodium transporter activity	http://amigo.geneontology.org/amigo/term/GO:0008554	Atp1a2 Atp1b1 Atp1b2
0.00139322	3	11	43.887	P-type potassium transmembrane transporter activity	http://amigo.geneontology.org/amigo/term/GO:0008556	Atp1a2 Atp1b1 Atp1b2
0.00172828	3	13	37.1352	Secondary active monocarboxylate transmembrane transporter activity	http://amigo.geneontology.org/amigo/term/GO:0015355	Slc6a11 Slc6a1 Slc32a1
0.000659662	4	18	35.7598	Amino acid:cation symporter activity	http://amigo.geneontology.org/amigo/term/GO:0005416	Slc38a2 Slc6a11 Slc6a1 Slc32a1
0.00207439	3	14	34.4827	Amino acid:sodium symporter activity	http://amigo.geneontology.org/amigo/term/GO:0005283	Slc38a2 Slc6a11 Slc6a1
0.000262528	5	30	26.8199	P-type ion transporter activity	http://amigo.geneontology.org/amigo/term/GO:0015662	Atp1a2 Atp2b1 Atp2b4 Atp1b1 Atp1b2
0.000262528	5	30	26.8199	P-type transmembrane transporter activity	http://amigo.geneontology.org/amigo/term/GO:0140358	Atp1a2 Atp2b1 Atp2b4 Atp1b1 Atp1b2
0.00669945	3	22	21.9435	Nitric-oxide synthase binding	http://amigo.geneontology.org/amigo/term/GO:0050998	Atp2b4 Dmd Camk2d
0.0102942	3	27	17.8799	Organic acid:sodium symporter activity	http://amigo.geneontology.org/amigo/term/GO:0005343	Slc38a2 Slc6a11 Slc6a1
0.00113164	5	55	14.629	ATPase-coupled cation transmembrane transporter activity	http://amigo.geneontology.org/amigo/term/GO:0019829	Atp1a2 Atp2b1 Atp2b4 Atp1b1 Atp1b2
0.00113164	7	135	8.34395	Sodium ion transmembrane transporter activity	http://amigo.geneontology.org/amigo/term/GO:0015081	Atp1a2 Slc38a2 Atp1b1 Slc6a11 Slc6a1 Atp1b2 Scn9a
0.00704605	5	99	8.12723	Protein tyrosine phosphatase activity	http://amigo.geneontology.org/amigo/term/GO:0004725	Ptprk Ptprn Ptprd Ptprt Ptprz1
0.00332578	6	127	7.60248	ATPase-coupled transmembrane transporter activity	http://amigo.geneontology.org/amigo/term/GO:0042626	Atp1a2 Atp2b1 Atp2b4 Atp1b1 Abca2 Atp1b2
0.0105277	5	111	7.24861	PDZ domain binding	http://amigo.geneontology.org/amigo/term/GO:0030165	Gria3 Atp2b1 Atp2b4 Cadm1 Dmd
0.00120045	9	250	5.79309	Active ion transmembrane transporter activity	http://amigo.geneontology.org/amigo/term/GO:0022853	Atp1a2 Atp2b1 Slc38a2 Atp2b4 Atp1b1 Slc6a11 Slc6a1 Slc32a1 Atp1b2
0.00155878	9	272	5.32453	Cell adhesion molecule binding	http://amigo.geneontology.org/amigo/term/GO:0050839	Tenm1 Nfasc Ptprd Thy1 Cadm1 Cd81 Dmd Ptprt Ptprz1
0.00155878	11	412	4.29638	Metal ion transmembrane transporter activity	http://amigo.geneontology.org/amigo/term/GO:0046873	Atp1a2 Atp2b1 Cacng4 Slc38a2 Atp2b4 Atp1b1 Slc6a11 Slc6a1 Cacna2d1 Atp1b2 Scn9a
0.00486515	10	406	3.96353	Active transmembrane transporter activity	http://amigo.geneontology.org/amigo/term/GO:0022804	Atp1a2 Atp2b1 Slc38a2 Atp2b4 Atp1b1 Abca2 Slc6a11 Slc6a1 Slc32a1 Atp1b2
0.00111545	14	573	3.93171	Inorganic cation transmembrane transporter activity	http://amigo.geneontology.org/amigo/term/GO:0022890	Gria3 Atp1a2 Atp2b1 Cacng4 Slc38a2 Atp2b4 Atp1b1 Pex5l Slc6a11 Slc6a1 Slc32a1 Cacna2d1 Atp1b2 Scn9a
0.000782534	16	703	3.66246	Inorganic molecular entity transmembrane transporter activity	http://amigo.geneontology.org/amigo/term/GO:0015318	Gabrg1 Gria3 Atp1a2 Atp2b1 Cacng4 Slc38a2 Atp2b4 Atp1b1 Pex5l Slc6a11 Slc6a1 Gria2 Slc32a1 Cacna2d1 Atp1b2 Scn9a
0.00139322	14	625	3.60459	Cation transmembrane transporter activity	http://amigo.geneontology.org/amigo/term/GO:0008324	Gria3 Atp1a2 Atp2b1 Cacng4 Slc38a2 Atp2b4 Atp1b1 Pex5l Slc6a11 Slc6a1 Slc32a1 Cacna2d1 Atp1b2 Scn9a
0.00155878	16	821	3.13606	Ion transmembrane transporter activity	http://amigo.geneontology.org/amigo/term/GO:0015075	Gabrg1 Gria3 Atp1a2 Atp2b1 Cacng4 Slc38a2 Atp2b4 Atp1b1 Pex5l Slc6a11 Slc6a1 Gria2 Slc32a1 Cacna2d1 Atp1b2 Scn9a
0.00704605	14	786	2.86624	Protein domain specific binding	http://amigo.geneontology.org/amigo/term/GO:0019904	Gria3 Hap1 Atp2b1 Nfasc Atp2b4 Gnas Arhgap6 Sorbs2 Cadm1 Ppp1r9a Acsl3 Ogt Elmo1 Dmd
0.00332578	18	1089	2.65982	Transmembrane transporter activity	http://amigo.geneontology.org/amigo/term/GO:0022857	Gabrg1 Gria3 Atp1a2 Atp2b1 Cacng4 Slc38a2 Atp2b4 Atp1b1 Abca2 Pex5l Slc6a11 Slc6a1 Gria2 Slc32a1 Cacna2d1 Atp1b2 Sv2c Scn9a
0.0067842	18	1172	2.47145	Transporter activity	http://amigo.geneontology.org/amigo/term/GO:0005215	Gabrg1 Gria3 Atp1a2 Atp2b1 Cacng4 Slc38a2 Atp2b4 Atp1b1 Abca2 Pex5l Slc6a11 Slc6a1 Gria2 Slc32a1 Cacna2d1 Atp1b2 Sv2c Scn9a
0.00155878	23	1502	2.46414	Signaling receptor binding	http://amigo.geneontology.org/amigo/term/GO:0005102	Gabrg1 Sst Hap1 Sema6a Cacng4 Cartpt Clu Il1rap Ly6h Gnas Ptprd Agt Thy1 Cadm1 Vgf Cd81 Grk3 Dmd Pnoc Scg2 Tubb3 Ptprz1 Syne1
0.0085861	24	1869	2.06638	Molecular function regulator	http://amigo.geneontology.org/amigo/term/GO:0098772	Sst Itih3 Sema6a Cacng4 Cartpt Ly6h Bin1 Atp2b4 Atp1b1 Abca2 Gnas Serpini1 Rgs10 Arhgap6 Agt Thy1 Vgf Dock10 Elmo1 Atp1b2 Pnoc Scg2 Camk2d Nrxn3

## Sheet: ShinyGo 0.75 - KEGG
Enrichment FDR	nGenes	Pathway Genes	Fold Enrichment	Pathway	URL	Genes
0.00178114	4	40	16.0919	Nicotine addiction	http://www.genome.jp/kegg-bin/show_pathway?mmu05033	Gabrg1 Gria3 Gria2 Slc32a1
0.0442156	2	22	14.629	Proximal tubule bicarbonate reclamation	http://www.genome.jp/kegg-bin/show_pathway?mmu04964	Atp1b1 Atp1b2
0.00100695	5	61	13.1901	Endocrine and other factor-regulated calcium reabsorption	http://www.genome.jp/kegg-bin/show_pathway?mmu04961	Atp2b1 Atp2b4 Atp1b1 Gnas Atp1b2
5.9867e-05	7	89	12.6566	GABAergic synapse	http://www.genome.jp/kegg-bin/show_pathway?mmu04727	Gabrg1 Hap1 Slc38a2 Gad2 Slc6a11 Slc6a1 Slc32a1
0.00384183	4	54	11.9199	Mineral absorption	http://www.genome.jp/kegg-bin/show_pathway?mmu04978	Atp2b1 Atp2b4 Atp1b1 Atp1b2
0.000112544	7	102	11.0435	Aldosterone synthesis and secretion	http://www.genome.jp/kegg-bin/show_pathway?mmu04925	Atp2b1 Atp2b4 Atp1b1 Gnas Agt Atp1b2 Camk2d
0.00178114	5	75	10.7279	Gastric acid secretion	http://www.genome.jp/kegg-bin/show_pathway?mmu04971	Sst Atp1b1 Gnas Atp1b2 Camk2d
2.57306e-05	9	149	9.71995	Adrenergic signaling in cardiomyocytes	http://www.genome.jp/kegg-bin/show_pathway?mmu04261	Atp2b1 Cacng4 Atp2b4 Atp1b1 Gnas Agt Cacna2d1 Atp1b2 Camk2d
0.00273798	5	85	9.46583	Salivary secretion	http://www.genome.jp/kegg-bin/show_pathway?mmu04970	Atp2b1 Atp2b4 Atp1b1 Gnas Atp1b2
0.00339125	5	91	8.84171	Morphine addiction	http://www.genome.jp/kegg-bin/show_pathway?mmu05032	Gabrg1 Pde10a Gnas Slc32a1 Grk3
0.0101611	4	74	8.69833	Thyroid hormone synthesis	http://www.genome.jp/kegg-bin/show_pathway?mmu04918	Atp1a2 Atp1b1 Gnas Atp1b2
0.00155792	6	112	8.62067	Pancreatic secretion	http://www.genome.jp/kegg-bin/show_pathway?mmu04972	Atp1a2 Atp2b1 Atp2b4 Atp1b1 Gnas Atp1b2
0.00358526	5	94	8.55953	Dilated cardiomyopathy	http://www.genome.jp/kegg-bin/show_pathway?mmu05414	Cacng4 Gnas Agt Cacna2d1 Dmd
0.0110443	4	77	8.35943	Synaptic vesicle cycle	http://www.genome.jp/kegg-bin/show_pathway?mmu04721	Slc6a11 Slc6a1 Slc32a1 Unc13c
1.51353e-05	11	217	8.15719	CAMP signaling pathway	http://www.genome.jp/kegg-bin/show_pathway?mmu04024	Gria3 Sst Atp1a2 Atp2b1 Pde10a Atp2b4 Atp1b1 Gnas Gria2 Atp1b2 Camk2d
0.0350642	3	60	8.04596	Long-term depression	http://www.genome.jp/kegg-bin/show_pathway?mmu04730	Gria3 Gnas Gria2
0.0153949	4	86	7.48461	Insulin secretion	http://www.genome.jp/kegg-bin/show_pathway?mmu04911	Atp1b1 Gnas Atp1b2 Camk2d
0.00574829	5	108	7.44996	Protein digestion and absorption	http://www.genome.jp/kegg-bin/show_pathway?mmu04974	Slc38a2 Atp1b1 Col11a1 Atp1b2 Col25a1
0.0153949	4	87	7.39858	Cardiac muscle contraction	http://www.genome.jp/kegg-bin/show_pathway?mmu04260	Cacng4 Atp1b1 Cacna2d1 Atp1b2
0.00655729	5	113	7.12031	Glutamatergic synapse	http://www.genome.jp/kegg-bin/show_pathway?mmu04724	Gria3 Slc38a2 Gnas Gria2 Grk3
0.0455767	3	68	7.09937	Amphetamine addiction	http://www.genome.jp/kegg-bin/show_pathway?mmu05031	Gria3 Gnas Gria2
0.0171813	4	91	7.07337	Hypertrophic cardiomyopathy	http://www.genome.jp/kegg-bin/show_pathway?mmu05410	Cacng4 Agt Cacna2d1 Dmd
0.0203213	4	98	6.56813	Circadian entrainment	http://www.genome.jp/kegg-bin/show_pathway?mmu04713	Gria3 Gnas Gria2 Camk2d
0.0203213	5	160	5.02872	Cell adhesion molecules	http://www.genome.jp/kegg-bin/show_pathway?mmu04514	Alcam Nfasc Cadm1 Ncam1 Nrxn3
0.0467259	4	132	4.87634	Dopaminergic synapse	http://www.genome.jp/kegg-bin/show_pathway?mmu04728	Gria3 Gnas Gria2 Camk2d
0.0256663	5	171	4.70524	CGMP-PKG signaling pathway	http://www.genome.jp/kegg-bin/show_pathway?mmu04022	Atp1a2 Atp2b1 Atp2b4 Atp1b1 Atp1b2

## Sheet: ShinyGo 0.75 - Biocarta
None

## Sheet: ShinyGo 0.75 - Reactome
Enrichment FDR	nGenes	Pathway Genes	Fold Enrichment	Pathway	URL	Genes
0.00463881	2	4	80.4596	Activation of AMPA receptors	https://reactome.org/download/current	Gria3 Gria2
0.00463881	2	4	80.4596	Reuptake of GABA	https://reactome.org/download/current	Slc6a11 Slc6a1
0.000195156	4	20	32.1838	GABA synthesis release reuptake and degradation	https://reactome.org/download/current	Gad2 Slc6a11 Slc6a1 Slc32a1
0.0340571	2	13	24.7568	Trafficking of GluR2-containing AMPA receptors	https://reactome.org/download/current	Gria3 Gria2
0.000546756	4	27	23.8399	Trafficking of AMPA receptors	https://reactome.org/download/current	Gria3 Cacng4 Gria2 Camk2d
0.000546756	4	27	23.8399	Glutamate binding activation of AMPA receptors and synaptic plasticity	https://reactome.org/download/current	Gria3 Cacng4 Gria2 Camk2d
0.0352404	2	14	22.9884	Reduction of cytosolic Ca++ levels	https://reactome.org/download/current	Atp2b1 Atp2b4
0.0352404	2	14	22.9884	LGI-ADAM interactions	https://reactome.org/download/current	Cacng4 Lgi3
4.50077e-05	6	51	18.9317	Neurotransmitter release cycle	https://reactome.org/download/current	Syn2 Slc38a2 Gad2 Slc6a11 Slc6a1 Slc32a1
4.50077e-05	6	51	18.9317	Ion homeostasis	https://reactome.org/download/current	Atp1a2 Atp2b1 Atp2b4 Atp1b1 Atp1b2 Camk2d
5.29652e-05	6	56	17.2413	Ion transport by P-type ATPases	https://reactome.org/download/current	Atp1a2 Atp2b1 Atp2b4 Atp1b1 Atp1b2 Camk2d
0.0340571	3	46	10.4947	Phase 0-rapid depolarisation	https://reactome.org/download/current	Cacng4 Camk2d Scn9a
5.29652e-05	8	127	10.1366	Cardiac conduction	https://reactome.org/download/current	Atp1a2 Atp2b1 Cacng4 Atp2b4 Atp1b1 Atp1b2 Camk2d Scn9a
0.0136685	4	70	9.19538	Protein-protein interactions at synapses	https://reactome.org/download/current	Gria3 Il1rap Ptprd Nrxn3
1.07952e-06	12	212	9.10863	Transmission across Chemical Synapses	https://reactome.org/download/current	Gria3 Syn2 Cacng4 Slc38a2 Gad2 Slc6a11 Slc6a1 Gria2 Slc32a1 Ncald Nrgn Camk2d
0.018426	4	77	8.35943	Platelet homeostasis	https://reactome.org/download/current	Atp2b1 Pde10a Atp2b4 Gnas
9.60741e-05	9	188	7.70357	Muscle contraction	https://reactome.org/download/current	Atp1a2 Atp2b1 Cacng4 Atp2b4 Atp1b1 Atp1b2 Dmd Camk2d Scn9a
0.0297424	4	89	7.23232	Post-translational modificationsynthesis of GPI-anchored proteins	https://reactome.org/download/current	Ly6h Thy1 Ntm Opcml
8.76619e-07	15	341	7.07855	Neuronal System	https://reactome.org/download/current	Gria3 Syn2 Cacng4 Slc38a2 Il1rap Gad2 Ptprd Slc6a11 Slc6a1 Gria2 Slc32a1 Ncald Nrgn Camk2d Nrxn3
0.00534641	6	144	6.70496	Neurotransmitter receptors and postsynaptic signal transmission	https://reactome.org/download/current	Gria3 Cacng4 Gria2 Ncald Nrgn Camk2d
0.0136685	6	179	5.39394	Ion channel transport	https://reactome.org/download/current	Atp1a2 Atp2b1 Atp2b4 Atp1b1 Atp1b2 Camk2d
0.00732973	12	608	3.17604	Hemostasis	https://reactome.org/download/current	Itih3 Atp2b1 Clu Pde10a Cdc37l1 Atp2b4 Atp1b1 Gnas Pcdh7 Dock10 Atp1b2 Tubb3
0.00963713	12	632	3.05543	Transport of small molecules	https://reactome.org/download/current	Atp1a2 Atp2b1 Slc38a2 Atp2b4 Atp1b1 Abca2 Gnas Slc6a11 Slc6a1 Slc32a1 Atp1b2 Camk2d
