# Supplementary material for: Cell-specific transcriptome changes in the hypothalamic arcuate nucleus in a mouse deoxycorticosterone acetate-salt model of hypertension
Source: Front Cell Neurosci. 2023 May 24;17:1207350. doi: 10.3389/fncel.2023.1207350 (PMC10244568; doi:10.3389/fncel.2023.1207350)
Supplement: Supplementary file 7 [file Data_Sheet_7.XLSX]

## Sheet: ShinyGo 0.75 - GO Bio Process
Table S12 - N_SC2 vs N_SC0 Enrichment Results
Enrichment FDR	nGenes	Pathway Genes	Fold Enrichment	Pathway	URL	Genes
0.0204524	2	9	180.123	Adult feeding behavior	http://amigo.geneontology.org/amigo/term/GO:0008343	Agrp Npy
0.0356285	2	14	115.794	Positive regulation of striated muscle contraction	http://amigo.geneontology.org/amigo/term/GO:0045989	Rgs2 Atp1a1
0.0356285	2	15	108.074	Stabilization of membrane potential	http://amigo.geneontology.org/amigo/term/GO:0030322	Kcnk9 Kcnk2
0.0383977	2	17	95.3595	Negative regulation of cAMP-mediated signaling	http://amigo.geneontology.org/amigo/term/GO:0043951	Rgs2 Npy2r
0.0163136	3	48	50.6597	Positive regulation of muscle contraction	http://amigo.geneontology.org/amigo/term/GO:0045933	Rgs2 Npy2r Atp1a1
0.000191003	5	104	38.969	Neuropeptide signaling pathway	http://amigo.geneontology.org/amigo/term/GO:0007218	Agrp Npy2r Npy Pgr15l Pcsk1n

## Sheet: ShinyGo 0.75 - GO Molec Funct
Enrichment FDR	nGenes	Pathway Genes	Fold Enrichment	Pathway	URL	Genes
0.0445923	1	3	270.185	Neuropeptide Y receptor binding	http://amigo.geneontology.org/amigo/term/GO:0031841	Npy
0.0445923	1	3	270.185	Nodal binding	http://amigo.geneontology.org/amigo/term/GO:0038100	Acvr1c
0.0445923	1	3	270.185	Glucuronylgalactosylproteoglycan 4-beta-N-acetylgalactosaminyltransferase activity	http://amigo.geneontology.org/amigo/term/GO:0047237	Csgalnact1
0.0456814	1	5	162.111	Peptide YY receptor activity	http://amigo.geneontology.org/amigo/term/GO:0001601	Npy2r
0.0456814	1	5	162.111	Exopolyphosphatase activity	http://amigo.geneontology.org/amigo/term/GO:0004309	Prune2
0.0456814	1	5	162.111	Activin receptor activity, type I	http://amigo.geneontology.org/amigo/term/GO:0016361	Acvr1c
0.00839676	2	12	135.093	Neuropeptide Y receptor activity	http://amigo.geneontology.org/amigo/term/GO:0004983	Npy2r Pgr15l
0.00839676	2	14	115.794	Potassium ion leak channel activity	http://amigo.geneontology.org/amigo/term/GO:0022841	Kcnk9 Kcnk2
0.00839676	2	16	101.319	Leak channel activity	http://amigo.geneontology.org/amigo/term/GO:0022840	Kcnk9 Kcnk2
0.00839676	2	16	101.319	Narrow pore channel activity	http://amigo.geneontology.org/amigo/term/GO:0022842	Kcnk9 Kcnk2
0.018055	2	26	62.3504	Neuropeptide hormone activity	http://amigo.geneontology.org/amigo/term/GO:0005184	Agrp Npy
0.0241873	2	38	42.6608	Phosphatidylinositol 3-kinase binding	http://amigo.geneontology.org/amigo/term/GO:0043548	Atp1a1 Irs4
0.0241873	2	38	42.6608	Neuropeptide receptor binding	http://amigo.geneontology.org/amigo/term/GO:0071855	Agrp Npy
0.026252	2	42	38.5979	Neuropeptide receptor activity	http://amigo.geneontology.org/amigo/term/GO:0008188	Npy2r Pgr15l
0.0456814	2	84	19.2989	Voltage-gated potassium channel activity	http://amigo.geneontology.org/amigo/term/GO:0005249	Kcnk9 Kcnk2
0.0241873	3	153	15.8932	Potassium ion transmembrane transporter activity	http://amigo.geneontology.org/amigo/term/GO:0015079	Atp1a1 Kcnk9 Kcnk2
0.0288635	4	423	7.66483	GTPase activator activity	http://amigo.geneontology.org/amigo/term/GO:0005096	Rgs2 Rasgrp1 Arhgap6 Arhgap36
0.0288635	4	439	7.38547	GTPase regulator activity	http://amigo.geneontology.org/amigo/term/GO:0030695	Rgs2 Rasgrp1 Arhgap6 Arhgap36
0.0288635	4	439	7.38547	Nucleoside-triphosphatase regulator activity	http://amigo.geneontology.org/amigo/term/GO:0060589	Rgs2 Rasgrp1 Arhgap6 Arhgap36
0.0272473	8	1869	3.46947	Molecular function regulator	http://amigo.geneontology.org/amigo/term/GO:0098772	Agrp Rgs2 Rasgrp1 Npy Arhgap6 Arhgap36 Kcnk2 Pcsk1n

## Sheet: ShinyGo 0.75 - KEGG
Enrichment FDR	nGenes	Pathway Genes	Fold Enrichment	Pathway	URL	Genes
0.00461566	3	71	34.2488	Adipocytokine signaling pathway	http://www.genome.jp/kegg-bin/show_pathway?mmu04920	Agrp Npy Irs4
0.0368294	2	56	28.9484	Regulation of lipolysis in adipocytes	http://www.genome.jp/kegg-bin/show_pathway?mmu04923	Npy Irs4
0.0490609	2	75	21.6148	Gastric acid secretion	http://www.genome.jp/kegg-bin/show_pathway?mmu04971	Atp1a1 Kcnk2
0.0304559	3	171	14.2203	CGMP-PKG signaling pathway	http://www.genome.jp/kegg-bin/show_pathway?mmu04022	Rgs2 Atp1a1 Irs4

## Sheet: ShinyGo 0.75 - Reactome
Enrichment FDR	nGenes	Pathway Genes	Fold Enrichment	Pathway	URL	Genes
0.0349347	1	2	405.278	TWIK-releated acid-sensitive K+ channel TASK	https://reactome.org/download/current	Kcnk9
0.0448893	1	3	270.185	TWIK related potassium channel TREK	https://reactome.org/download/current	Kcnk2
0.00680563	2	11	147.374	Tandem pore domain potassium channels	https://reactome.org/download/current	Kcnk9 Kcnk2
0.00941569	2	18	90.0617	Phase 4-resting membrane potential	https://reactome.org/download/current	Kcnk9 Kcnk2
0.0142844	3	127	19.147	Cardiac conduction	https://reactome.org/download/current	Atp1a1 Kcnk9 Kcnk2
0.0332728	3	188	12.9344	Muscle contraction	https://reactome.org/download/current	Atp1a1 Kcnk9 Kcnk2
0.0332728	9	2453	2.97391	Signal Transduction	https://reactome.org/download/current	Rgs2 Acvr1c Rasgrp1 Npy2r Npy Arhgap6 Arhgap36 Cited1 Irs4
