# Supplementary material for: Cell-specific transcriptome changes in the hypothalamic arcuate nucleus in a mouse deoxycorticosterone acetate-salt model of hypertension
Source: Front Cell Neurosci. 2023 May 24;17:1207350. doi: 10.3389/fncel.2023.1207350 (PMC10244568; doi:10.3389/fncel.2023.1207350)
Supplement: Supplementary file 8 [file Data_Sheet_8.XLSX]

## Sheet: ShinyGo 0.75 - GO Bio Process
Table S13 - N_SC2 vs N_SC9 Enrichment Results
Enrichment FDR	nGenes	Pathway Genes	Fold Enrichment	Pathway	URL	Genes
0.00314648	4	48	21.7113	Rac protein signal transduction	http://amigo.geneontology.org/amigo/term/GO:0016601	Auts2 Ogt Elmo1 Camk2d
1.13659e-05	15	670	5.83289	Plasma membrane bounded cell projection morphogenesis	http://amigo.geneontology.org/amigo/term/GO:0120039	Sema6a Enpp2 Dst Nfasc Ptprd Epha5 Auts2 Chl1 Ppp1r9a Rreb1 Isl1 Dmd Unc5d Ptprz1 Syne1
0.00100795	10	449	5.80258	Regulation of membrane potential	http://amigo.geneontology.org/amigo/term/GO:0042391	Bin1 Ppp1r9a Atp1a1 Kcnk9 Kcnk2 Dmd Camk2d Kcnq3 Scn9a Syne1
1.13659e-05	15	675	5.78968	Cell projection morphogenesis	http://amigo.geneontology.org/amigo/term/GO:0048858	Sema6a Enpp2 Dst Nfasc Ptprd Epha5 Auts2 Chl1 Ppp1r9a Rreb1 Isl1 Dmd Unc5d Ptprz1 Syne1
1.75081e-05	15	704	5.55119	Cell part morphogenesis	http://amigo.geneontology.org/amigo/term/GO:0032990	Sema6a Enpp2 Dst Nfasc Ptprd Epha5 Auts2 Chl1 Ppp1r9a Rreb1 Isl1 Dmd Unc5d Ptprz1 Syne1
0.0035246	9	430	5.45307	Cell junction assembly	http://amigo.geneontology.org/amigo/term/GO:0034329	Ptprk Enpp2 Dst Nfasc Ptprd Arhgap6 Ppp1r9a Pcdh17 Nrxn3
0.00165698	10	488	5.33885	Axon development	http://amigo.geneontology.org/amigo/term/GO:0061564	Sema6a Ncam2 Dst Nfasc Epha5 Auts2 Chl1 Isl1 Unc5d Ptprz1
0.00442994	9	445	5.26926	Axonogenesis	http://amigo.geneontology.org/amigo/term/GO:0007409	Sema6a Dst Nfasc Epha5 Auts2 Chl1 Isl1 Unc5d Ptprz1
0.000418196	12	603	5.18479	Cell morphogenesis involved in neuron differentiation	http://amigo.geneontology.org/amigo/term/GO:0048667	Sema6a Dst Nfasc Ptprd Epha5 Auts2 Chl1 Ppp1r9a Isl1 Unc5d Ptprz1 Syne1
0.000183704	13	656	5.16306	Neuron projection morphogenesis	http://amigo.geneontology.org/amigo/term/GO:0048812	Sema6a Dst Nfasc Ptprd Epha5 Auts2 Chl1 Ppp1r9a Isl1 Dmd Unc5d Ptprz1 Syne1
5.98651e-05	15	792	4.93439	Cellular component morphogenesis	http://amigo.geneontology.org/amigo/term/GO:0032989	Sema6a Enpp2 Dst Nfasc Ptprd Epha5 Auts2 Chl1 Ppp1r9a Rreb1 Isl1 Dmd Unc5d Ptprz1 Syne1
0.000178926	14	762	4.78675	Cell morphogenesis involved in differentiation	http://amigo.geneontology.org/amigo/term/GO:0000904	Sema6a Enpp2 Dst Nfasc Ptprd Epha5 Auts2 Chl1 Ppp1r9a Rreb1 Isl1 Unc5d Ptprz1 Syne1
1.94511e-05	18	1064	4.40756	Neuron projection development	http://amigo.geneontology.org/amigo/term/GO:0031175	Hap1 Sema6a Ptprk Ncam2 Dst Nfasc Ptprd Epha5 Auts2 Npy Chl1 Ppp1r9a Isl1 Dmd Unc5d Ptprz1 H2-D1 Syne1
0.00599984	11	701	4.08829	Regulation of plasma membrane bounded cell projection organization	http://amigo.geneontology.org/amigo/term/GO:0120035	Hap1 Sema6a Enpp2 Ptprd Auts2 Ppp1r9a Rreb1 Dmd Ptprz1 H2-D1 Syne1
1.13659e-05	21	1362	4.01707	Cell adhesion	http://amigo.geneontology.org/amigo/term/GO:0007155	Sema6a Ptprk Enpp2 Ncam2 Dst Nfasc Rasgrp1 Gnas Ptprd Pcdh7 Epha5 Chl1 Arhgap6 Pcdh17 Rreb1 Dmd Pcdh9 Lsamp Unc5d Nrxn3 Ptprz1
1.13659e-05	21	1374	3.98199	Biological adhesion	http://amigo.geneontology.org/amigo/term/GO:0022610	Sema6a Ptprk Enpp2 Ncam2 Dst Nfasc Rasgrp1 Gnas Ptprd Pcdh7 Epha5 Chl1 Arhgap6 Pcdh17 Rreb1 Dmd Pcdh9 Lsamp Unc5d Nrxn3 Ptprz1
1.13659e-05	22	1470	3.89917	Neuron differentiation	http://amigo.geneontology.org/amigo/term/GO:0030182	Hap1 Sema6a Ptprk Otp Ncam2 Bin1 Dst Nfasc Ptprd Epha5 Auts2 Npy Chl1 Ppp1r9a Zfhx3 Isl1 Dmd Tcf4 Unc5d Ptprz1 H2-D1 Syne1
0.000104627	18	1206	3.88859	Neuron development	http://amigo.geneontology.org/amigo/term/GO:0048666	Hap1 Sema6a Ptprk Ncam2 Dst Nfasc Ptprd Epha5 Auts2 Npy Chl1 Ppp1r9a Isl1 Dmd Unc5d Ptprz1 H2-D1 Syne1
1.09236e-05	24	1627	3.84318	Generation of neurons	http://amigo.geneontology.org/amigo/term/GO:0048699	Hap1 Sema6a Ptprk Appl2 Otp Enpp2 Ncam2 Bin1 Dst Nfasc Ptprd Epha5 Auts2 Npy Chl1 Ppp1r9a Zfhx3 Isl1 Dmd Tcf4 Unc5d Ptprz1 H2-D1 Syne1
0.00113184	15	1056	3.70079	Cell morphogenesis	http://amigo.geneontology.org/amigo/term/GO:0000902	Sema6a Enpp2 Dst Nfasc Ptprd Epha5 Auts2 Chl1 Ppp1r9a Rreb1 Isl1 Dmd Unc5d Ptprz1 Syne1
1.13659e-05	24	1765	3.5427	Neurogenesis	http://amigo.geneontology.org/amigo/term/GO:0022008	Hap1 Sema6a Ptprk Appl2 Otp Enpp2 Ncam2 Bin1 Dst Nfasc Ptprd Epha5 Auts2 Npy Chl1 Ppp1r9a Zfhx3 Isl1 Dmd Tcf4 Unc5d Ptprz1 H2-D1 Syne1
0.000166574	20	1531	3.40347	Plasma membrane bounded cell projection organization	http://amigo.geneontology.org/amigo/term/GO:0120036	Hap1 Sema6a Ptprk Enpp2 Ncam2 Dst Nfasc Ptprd Epha5 Auts2 Npy Chl1 Ppp1r9a Rreb1 Isl1 Dmd Unc5d Ptprz1 H2-D1 Syne1
0.000202834	20	1570	3.31893	Cell projection organization	http://amigo.geneontology.org/amigo/term/GO:0030030	Hap1 Sema6a Ptprk Enpp2 Ncam2 Dst Nfasc Ptprd Epha5 Auts2 Npy Chl1 Ppp1r9a Rreb1 Isl1 Dmd Unc5d Ptprz1 H2-D1 Syne1
1.09236e-05	29	2409	3.13638	Nervous system development	http://amigo.geneontology.org/amigo/term/GO:0007399	Hap1 Sema6a Ptprk Appl2 Otp Enpp2 Slc38a2 Ncam2 Bin1 Dst Nfasc Acvr1c Ptprd Epha5 Auts2 Npy Chl1 Ppp1r9a Pcdh17 Zfhx3 Isl1 Dmd Tcf4 Pcdh9 Unc5d Nrxn3 Ptprz1 H2-D1 Syne1
1.78866e-05	27	2322	3.02949	Cell development	http://amigo.geneontology.org/amigo/term/GO:0048468	Hap1 Sema6a Ptprk Appl2 4930447C04Rik Otp Enpp2 Ncam2 Bin1 Dst Nfasc Ptprd Epha5 Auts2 Npy Chl1 Sorbs2 Ppp1r9a Rreb1 Isl1 Dmd Camk2d Unc5d Ptprz1 Msi2 H2-D1 Syne1
0.00599984	20	2053	2.5381	Movement of cell or subcellular component	http://amigo.geneontology.org/amigo/term/GO:0006928	Hap1 Sema6a Ptprk Appl2 Enpp2 Bin1 Dst Nfasc Acvr1c Rasgrp1 Epha5 Auts2 Chl1 Atp1a1 Rreb1 Elmo1 Isl1 Camk2d Unc5d Ptprz1
0.00122645	26	2821	2.40125	Regulation of localization	http://amigo.geneontology.org/amigo/term/GO:0032879	Hap1 Sema6a Ptprk Appl2 Enpp2 Bin1 Frmd4a Acvr1c Abca2 Gnas Epha5 Sorbs2 Ppp1r9a Atp1a1 Ogt Pcdh17 Rreb1 Isl1 Dmd Camk2d Kcnq3 Unc5d Nrxn3 Ptprz1 Scn9a Syne1
0.00113184	34	4330	2.04578	Cell differentiation	http://amigo.geneontology.org/amigo/term/GO:0030154	Hap1 Sema6a Plagl1 Ptprk Appl2 4930447C04Rik Otp Enpp2 Ncam2 Bin1 Dst Nfasc Acvr1c Rasgrp1 Gnas Ptprd Epha5 Auts2 Npy Chl1 Sorbs2 Ppp1r9a Zfhx3 Rreb1 Dlk1 Isl1 Dmd Tcf4 Camk2d Unc5d Ptprz1 Msi2 H2-D1 Syne1
0.00150741	34	4404	2.0114	Cellular developmental process	http://amigo.geneontology.org/amigo/term/GO:0048869	Hap1 Sema6a Plagl1 Ptprk Appl2 4930447C04Rik Otp Enpp2 Ncam2 Bin1 Dst Nfasc Acvr1c Rasgrp1 Gnas Ptprd Epha5 Auts2 Npy Chl1 Sorbs2 Ppp1r9a Zfhx3 Rreb1 Dlk1 Isl1 Dmd Tcf4 Camk2d Unc5d Ptprz1 Msi2 H2-D1 Syne1
0.000692274	37	4822	1.99913	System development	http://amigo.geneontology.org/amigo/term/GO:0048731	Hap1 Sema6a Plagl1 Ptprk Appl2 Otp Enpp2 Slc38a2 Ncam2 Bin1 Dst Nfasc Acvr1c Rasgrp1 Gnas Ptprd Epha5 Auts2 Npy Chl1 Sorbs2 Ppp1r9a Pcdh17 Csgalnact1 Kcnk2 Zfhx3 Rreb1 Isl1 Dmd Tcf4 Camk2d Pcdh9 Unc5d Nrxn3 Ptprz1 H2-D1 Syne1

## Sheet: ShinyGo 0.75 - GO Molec Funct
Enrichment FDR	nGenes	Pathway Genes	Fold Enrichment	Pathway	URL	Genes
0.0405574	2	5	104.214	Alkylglycerophosphoethanolamine phosphodiesterase activity	http://amigo.geneontology.org/amigo/term/GO:0047391	Enpp2 Gnas
0.0415528	3	38	20.5686	Neuropeptide receptor binding	http://amigo.geneontology.org/amigo/term/GO:0071855	Agrp Gnas Npy
0.0458605	4	99	10.5267	Protein tyrosine phosphatase activity	http://amigo.geneontology.org/amigo/term/GO:0004725	Ptprk Ptprn Ptprd Ptprz1
0.0415528	7	351	5.19587	Phosphoric ester hydrolase activity	http://amigo.geneontology.org/amigo/term/GO:0042578	Ptprk Enpp2 Ptprn Gnas Ptprd Atp1a1 Ptprz1
0.0405574	11	786	3.64617	Protein domain specific binding	http://amigo.geneontology.org/amigo/term/GO:0019904	Hap1 Nfasc Gnas Arhgap6 Sorbs2 Ppp1r9a Atp1a1 Ogt Elmo1 Dmd Irs4

## Sheet: ShinyGo 0.75 - KEGG
Enrichment FDR	nGenes	Pathway Genes	Fold Enrichment	Pathway	URL	Genes
0.0439999	3	56	13.9573	Regulation of lipolysis in adipocytes	http://www.genome.jp/kegg-bin/show_pathway?mmu04923	Gnas Npy Irs4
0.0275269	4	75	13.8952	Gastric acid secretion	http://www.genome.jp/kegg-bin/show_pathway?mmu04971	Gnas Atp1a1 Kcnk2 Camk2d
0.0439999	3	60	13.0268	Type I diabetes mellitus	http://www.genome.jp/kegg-bin/show_pathway?mmu04940	Ptprn Gad2 H2-D1
0.0439999	4	102	10.2171	Aldosterone synthesis and secretion	http://www.genome.jp/kegg-bin/show_pathway?mmu04925	Gnas Atp1a1 Kcnk9 Camk2d
0.0439999	5	217	6.00313	CAMP signaling pathway	http://www.genome.jp/kegg-bin/show_pathway?mmu04024	Gnas Npy Atp1a1 Gria2 Camk2d

## Sheet: ShinyGo 0.75 - Biocarta
None

## Sheet: ShinyGo 0.75 - Reactome
Enrichment FDR	nGenes	Pathway Genes	Fold Enrichment	Pathway	URL	Genes
0.0309228	2	11	47.3701	Tandem pore domain potassium channels	https://reactome.org/download/current	Kcnk9 Kcnk2
0.00685171	5	127	10.2573	Cardiac conduction	https://reactome.org/download/current	Atp1a1 Kcnk9 Kcnk2 Camk2d Scn9a
0.00683477	6	188	8.31497	Muscle contraction	https://reactome.org/download/current	Atp1a1 Kcnk9 Kcnk2 Dmd Camk2d Scn9a
0.00101492	9	341	6.87631	Neuronal System	https://reactome.org/download/current	Slc38a2 Gad2 Ptprd Gria2 Kcnk9 Kcnk2 Camk2d Kcnq3 Nrxn3
