# Supplementary material for: Cell-specific transcriptome changes in the hypothalamic arcuate nucleus in a mouse deoxycorticosterone acetate-salt model of hypertension
Source: Front Cell Neurosci. 2023 May 24;17:1207350. doi: 10.3389/fncel.2023.1207350 (PMC10244568; doi:10.3389/fncel.2023.1207350)
Supplement: Supplementary file 9 [file Data_Sheet_9.XLSX]

## Sheet: ShinyGo 0.75 - GO Bio Process
Table S14 - N_SC9 vs N_SC0 Enrichment Results
Enrichment FDR	nGenes	Pathway Genes	Fold Enrichment	Pathway	URL	Genes
7.97535e-12	7	20	119.684	Ribosomal small subunit assembly	http://amigo.geneontology.org/amigo/term/GO:0000028	Rps14 Rpsa Rps19 Rps10 Rpl38 Rps28 Rps27
5.23857e-07	5	25	68.3906	Positive regulation of signal transduction by p53 class mediator	http://amigo.geneontology.org/amigo/term/GO:1901798	Rps20 Rpl37 Rpl11 Rpl26 Rpl23
9.21894e-07	5	28	61.0631	Ribosomal large subunit assembly	http://amigo.geneontology.org/amigo/term/GO:0000027	Rpl38 Rpl10-ps3 Rpl11 Rpl3 Rpl24
3.20813e-15	11	63	59.7061	Ribosome assembly	http://amigo.geneontology.org/amigo/term/GO:0042255	Rps14 Rpsa Rps19 Rps10 Rpl38 Rpl10-ps3 Rpl11 Rpl3 Rps28 Rps27 Rpl24
1.0204e-23	17	101	57.5565	Cytoplasmic translation	http://amigo.geneontology.org/amigo/term/GO:0002181	Rpl8 Rplp1 Rpl19 Rpsa Rps29 Rps21 Rpl18a Rpl9 Rps23 Rpl38 Rpl32 Rpl36 Rpl30 Rpl11 Rpl26 Rps28 Rpl24
6.0477e-13	10	69	49.5584	Ribosomal small subunit biogenesis	http://amigo.geneontology.org/amigo/term/GO:0042274	Rps14 Rps24 Rpsa Rps21 Rps19 Rps8 Rps10 Rpl38 Rps28 Rps27
8.13742e-06	5	44	38.8583	Maturation of SSU-rRNA	http://amigo.geneontology.org/amigo/term/GO:0030490	Rps14 Rps21 Rps19 Rps8 Rps28
7.21835e-08	7	69	34.6909	Ribosomal large subunit biogenesis	http://amigo.geneontology.org/amigo/term/GO:0042273	Rpl14 Rpl38 Rpl10-ps3 Rpl11 Rpl3 Rpl26 Rpl24
1.95017e-06	6	66	31.0866	ATP synthesis coupled electron transport	http://amigo.geneontology.org/amigo/term/GO:0042773	mt-Nd1 mt-Nd2 mt-Co1 mt-Nd3 mt-Nd5 mt-Nd4l
8.95567e-06	6	87	23.583	Respiratory electron transport chain	http://amigo.geneontology.org/amigo/term/GO:0022904	mt-Nd1 mt-Nd2 mt-Co1 mt-Nd3 mt-Nd5 mt-Nd4l
8.16158e-48	43	640	22.975	Translation	http://amigo.geneontology.org/amigo/term/GO:0006412	Rpl13 Rps11 Rpl8 Rplp1 Rpl19 Rps27a Rps14 Rps24 Rpl14 Rgs2 Rps3a1 Rps20 Rpsa Rps29 Lars2 Eef1a1 Fau Rps21 Rps19 Rpl21 Rpl37 Rpl18a Rpl37a Rpl27a Rpl9 Rps8 Rps23 Rpl38 Rpl32 Rpl36 Rpl10-ps3 Rpl30 Rpl11 Rpl3 Rpl26 Rps12 Rpl34 Rpl17 Rps28 Rpl23 Rps27 Rpl41 Rpl24
1.5719e-47	43	660	22.2788	Peptide biosynthetic process	http://amigo.geneontology.org/amigo/term/GO:0043043	Rpl13 Rps11 Rpl8 Rplp1 Rpl19 Rps27a Rps14 Rps24 Rpl14 Rgs2 Rps3a1 Rps20 Rpsa Rps29 Lars2 Eef1a1 Fau Rps21 Rps19 Rpl21 Rpl37 Rpl18a Rpl37a Rpl27a Rpl9 Rps8 Rps23 Rpl38 Rpl32 Rpl36 Rpl10-ps3 Rpl30 Rpl11 Rpl3 Rpl26 Rps12 Rpl34 Rpl17 Rps28 Rpl23 Rps27 Rpl41 Rpl24
3.76781e-10	11	182	20.6675	Ribonucleoprotein complex assembly	http://amigo.geneontology.org/amigo/term/GO:0022618	Rps14 Rpsa Rps19 Rps10 Rpl38 Rpl10-ps3 Rpl11 Rpl3 Rps28 Rps27 Rpl24
5.06699e-10	11	188	20.0079	Ribonucleoprotein complex subunit organization	http://amigo.geneontology.org/amigo/term/GO:0071826	Rps14 Rpsa Rps19 Rps10 Rpl38 Rpl10-ps3 Rpl11 Rpl3 Rps28 Rps27 Rpl24
1.47834e-14	16	288	18.9974	Ribosome biogenesis	http://amigo.geneontology.org/amigo/term/GO:0042254	Rps14 Rps24 Rpl14 Rpsa Rps21 Rps19 Rps8 Rps10 Rpl38 Rpl10-ps3 Rpl11 Rpl3 Rpl26 Rps28 Rps27 Rpl24
1.22377e-44	43	776	18.9484	Amide biosynthetic process	http://amigo.geneontology.org/amigo/term/GO:0043604	Rpl13 Rps11 Rpl8 Rplp1 Rpl19 Rps27a Rps14 Rps24 Rpl14 Rgs2 Rps3a1 Rps20 Rpsa Rps29 Lars2 Eef1a1 Fau Rps21 Rps19 Rpl21 Rpl37 Rpl18a Rpl37a Rpl27a Rpl9 Rps8 Rps23 Rpl38 Rpl32 Rpl36 Rpl10-ps3 Rpl30 Rpl11 Rpl3 Rpl26 Rps12 Rpl34 Rpl17 Rps28 Rpl23 Rps27 Rpl41 Rpl24
9.04211e-44	43	818	17.9755	Peptide metabolic process	http://amigo.geneontology.org/amigo/term/GO:0006518	Rpl13 Rps11 Rpl8 Rplp1 Rpl19 Rps27a Rps14 Rps24 Rpl14 Rgs2 Rps3a1 Rps20 Rpsa Rps29 Lars2 Eef1a1 Fau Rps21 Rps19 Rpl21 Rpl37 Rpl18a Rpl37a Rpl27a Rpl9 Rps8 Rps23 Rpl38 Rpl32 Rpl36 Rpl10-ps3 Rpl30 Rpl11 Rpl3 Rpl26 Rps12 Rpl34 Rpl17 Rps28 Rpl23 Rps27 Rpl41 Rpl24
3.21273e-08	10	208	16.4401	RRNA processing	http://amigo.geneontology.org/amigo/term/GO:0006364	Rps14 Rps24 Rpl14 Rps21 Rps19 Rps8 Rpl11 Rpl26 Rps28 Rps27
4.39104e-08	10	217	15.7582	RRNA metabolic process	http://amigo.geneontology.org/amigo/term/GO:0016072	Rps14 Rps24 Rpl14 Rps21 Rps19 Rps8 Rpl11 Rpl26 Rps28 Rps27
5.11888e-39	43	1060	13.8717	Cellular amide metabolic process	http://amigo.geneontology.org/amigo/term/GO:0043603	Rpl13 Rps11 Rpl8 Rplp1 Rpl19 Rps27a Rps14 Rps24 Rpl14 Rgs2 Rps3a1 Rps20 Rpsa Rps29 Lars2 Eef1a1 Fau Rps21 Rps19 Rpl21 Rpl37 Rpl18a Rpl37a Rpl27a Rpl9 Rps8 Rps23 Rpl38 Rpl32 Rpl36 Rpl10-ps3 Rpl30 Rpl11 Rpl3 Rpl26 Rps12 Rpl34 Rpl17 Rps28 Rpl23 Rps27 Rpl41 Rpl24
3.59277e-12	16	413	13.2476	Ribonucleoprotein complex biogenesis	http://amigo.geneontology.org/amigo/term/GO:0022613	Rps14 Rps24 Rpl14 Rpsa Rps21 Rps19 Rps8 Rps10 Rpl38 Rpl10-ps3 Rpl11 Rpl3 Rpl26 Rps28 Rps27 Rpl24
3.34501e-08	12	361	11.3669	Non-membrane-bounded organelle assembly	http://amigo.geneontology.org/amigo/term/GO:0140694	Rps14 Rpsa Rps19 Rps23 Rps10 Rpl38 Rpl10-ps3 Rpl11 Rpl3 Rps28 Rps27 Rpl24
1.60693e-33	44	1552	9.69455	Organonitrogen compound biosynthetic process	http://amigo.geneontology.org/amigo/term/GO:1901566	Rpl13 Rps11 Rpl8 Rplp1 Rpl19 Rps27a Rps14 Rps24 Rpl14 Rgs2 Rps3a1 Rps20 Mt3 Rpsa Rps29 Lars2 Eef1a1 Fau Rps21 Rps19 Rpl21 Rpl37 Rpl18a Rpl37a Rpl27a Rpl9 Rps8 Rps23 Rpl38 Rpl32 Rpl36 Rpl10-ps3 Rpl30 Rpl11 Rpl3 Rpl26 Rps12 Rpl34 Rpl17 Rps28 Rpl23 Rps27 Rpl41 Rpl24
4.42437e-06	10	363	9.4202	NcRNA processing	http://amigo.geneontology.org/amigo/term/GO:0034470	Rps14 Rps24 Rpl14 Rps21 Rps19 Rps8 Rpl11 Rpl26 Rps28 Rps27
3.23195e-06	11	449	8.37747	NcRNA metabolic process	http://amigo.geneontology.org/amigo/term/GO:0034660	Rps14 Rps24 Rpl14 Lars2 Rps21 Rps19 Rps8 Rpl11 Rpl26 Rps28 Rps27
9.21894e-07	16	992	5.51537	Cellular protein-containing complex assembly	http://amigo.geneontology.org/amigo/term/GO:0034622	Rps14 Rpsa Rps19 Tmsb4x Rps10 Rpl38 Rpl10-ps3 Rpl11 Rpl3 mt-Nd1 mt-Nd2 mt-Nd5 Rps28 Tmsb10 Rps27 Rpl24
2.48702e-18	48	4547	3.6098	Cellular nitrogen compound biosynthetic process	http://amigo.geneontology.org/amigo/term/GO:0044271	Rpl13 Pfdn5 Rps11 Rpl8 Rplp1 Rpl19 Rps27a Rps14 Rps24 Rpl14 Rgs2 Rps3a1 Rps20 Mt3 Rpsa Rps29 Lars2 Eef1a1 Fau Rps21 Rps19 Rpl21 Rpl37 Rpl18a Rpl37a Rpl27a Rpl9 Rps8 Rps23 Tmsb4x Cited1 Rpl38 Rpl32 Rpl36 Rpl10-ps3 Rpl30 Rpl11 Rpl3 Rpl26 Rps12 Rpl34 Rpl17 Rps28 Rpl23 Ppia Rps27 Rpl41 Rpl24
7.7406e-19	49	4657	3.59796	Cellular macromolecule biosynthetic process	http://amigo.geneontology.org/amigo/term/GO:0034645	Rpl13 Pfdn5 Rps11 Rpl8 Rplp1 Rpl19 Rps27a Rps14 Rps24 Rpl14 Rgs2 Cst3 Rps3a1 Rps20 Mt3 Rpsa Rps29 Lars2 Eef1a1 Fau Rps21 Rps19 Rpl21 Rpl37 Rpl18a Rpl37a Rpl27a Rpl9 Rps8 Rps23 Tmsb4x Cited1 Rpl38 Rpl32 Rpl36 Rpl10-ps3 Rpl30 Rpl11 Rpl3 Rpl26 Rps12 Rpl34 Rpl17 Rps28 Rpl23 Ppia Rps27 Rpl41 Rpl24
9.94157e-19	49	4695	3.56884	Macromolecule biosynthetic process	http://amigo.geneontology.org/amigo/term/GO:0009059	Rpl13 Pfdn5 Rps11 Rpl8 Rplp1 Rpl19 Rps27a Rps14 Rps24 Rpl14 Rgs2 Cst3 Rps3a1 Rps20 Mt3 Rpsa Rps29 Lars2 Eef1a1 Fau Rps21 Rps19 Rpl21 Rpl37 Rpl18a Rpl37a Rpl27a Rpl9 Rps8 Rps23 Tmsb4x Cited1 Rpl38 Rpl32 Rpl36 Rpl10-ps3 Rpl30 Rpl11 Rpl3 Rpl26 Rps12 Rpl34 Rpl17 Rps28 Rpl23 Ppia Rps27 Rpl41 Rpl24
1.48517e-15	46	4746	3.31434	Cellular protein metabolic process	http://amigo.geneontology.org/amigo/term/GO:0044267	Rpl13 Rps11 Rpl8 Rplp1 Rpl19 Rps27a Rps14 Rps24 Rpl14 Rgs2 Cst3 Rps3a1 Rps20 Mt3 Rpsa Rps29 Lars2 Eef1a1 Fau Rps21 Rps19 Rpl21 Rpl37 Rpl18a Rpl37a Rpl27a Rpl9 Rps8 Rps23 Rpl38 Rpl32 Rpl36 Rpl10-ps3 Rpl30 Rpl11 Rpl3 Rpl26 Rps12 Rpl34 Rpl17 Rps28 Rpl23 Ppia Rps27 Rpl41 Rpl24

## Sheet: ShinyGo 0.75 - GO Molec Funct
Enrichment FDR	nGenes	Pathway Genes	Fold Enrichment	Pathway	URL	Genes
0.0335348	1	2	170.977	Leucine-tRNA ligase activity	http://amigo.geneontology.org/amigo/term/GO:0004823	Lars2
0.0335348	1	2	170.977	Laminin receptor activity	http://amigo.geneontology.org/amigo/term/GO:0005055	Rpsa
2.95004e-07	4	9	151.979	Ubiquitin ligase inhibitor activity	http://amigo.geneontology.org/amigo/term/GO:1990948	Rps20 Rpl37 Rpl11 Rpl23
3.56228e-07	4	10	136.781	Ubiquitin-protein transferase inhibitor activity	http://amigo.geneontology.org/amigo/term/GO:0055105	Rps20 Rpl37 Rpl11 Rpl23
1.56857e-05	3	8	128.232	Large ribosomal subunit rRNA binding	http://amigo.geneontology.org/amigo/term/GO:0070180	Rpl19 Rpl37a Rpl23
6.75855e-70	41	172	81.5121	Structural constituent of ribosome	http://amigo.geneontology.org/amigo/term/GO:0003735	Rpl13 Rps11 Rpl8 Rplp1 Rpl19 Rps27a Rps14 Rps24 Rpl14 Rps3a1 Rps20 Rpsa Rps29 Fau Rps21 Rps19 Rpl21 Rpl37 Rpl18a Rpl37a Rpl27a Rpl9 Rps8 Rps23 Rps10 Rpl38 Rpl32 Rpl36 Rpl10-ps3 Rpl30 Rpl11 Rpl3 Rpl26 Rps12 Rpl34 Rpl17 Rps28 Rpl23 Rps27 Rpl41 Rpl24
3.56228e-07	5	27	63.3247	NADH dehydrogenase (ubiquinone) activity	http://amigo.geneontology.org/amigo/term/GO:0008137	mt-Nd1 mt-Nd2 mt-Nd3 mt-Nd5 mt-Nd4l
5.94459e-06	4	22	62.1733	Ubiquitin-protein transferase regulator activity	http://amigo.geneontology.org/amigo/term/GO:0055106	Rps20 Rpl37 Rpl11 Rpl23
3.78608e-07	5	28	61.0631	NADH dehydrogenase (quinone) activity	http://amigo.geneontology.org/amigo/term/GO:0050136	mt-Nd1 mt-Nd2 mt-Nd3 mt-Nd5 mt-Nd4l
4.37214e-07	5	30	56.9922	NAD(P)H dehydrogenase (quinone) activity	http://amigo.geneontology.org/amigo/term/GO:0003955	mt-Nd1 mt-Nd2 mt-Nd3 mt-Nd5 mt-Nd4l
4.7284e-07	5	31	55.1537	NADH dehydrogenase activity	http://amigo.geneontology.org/amigo/term/GO:0003954	mt-Nd1 mt-Nd2 mt-Nd3 mt-Nd5 mt-Nd4l
0.0049775	2	13	52.6082	5S rRNA binding	http://amigo.geneontology.org/amigo/term/GO:0008097	Rpl11 Rpl3
0.0049775	2	13	52.6082	MDM2/MDM4 family protein binding	http://amigo.geneontology.org/amigo/term/GO:0097371	Rps20 Rpl37
3.86135e-13	10	69	49.5584	RRNA binding	http://amigo.geneontology.org/amigo/term/GO:0019843	Rps11 Rpl8 Rpl19 Rps14 Rpl37 Rpl37a Rpl9 Rpl11 Rpl3 Rpl23
1.44256e-06	5	39	43.8401	Oxidoreductase activity, acting on NAD(P)H, quinone or similar compound as acceptor	http://amigo.geneontology.org/amigo/term/GO:0016655	mt-Nd1 mt-Nd2 mt-Nd3 mt-Nd5 mt-Nd4l
4.37214e-07	6	61	33.6347	Oxidoreduction-driven active transmembrane transporter activity	http://amigo.geneontology.org/amigo/term/GO:0015453	mt-Nd1 mt-Nd2 mt-Co1 mt-Nd3 mt-Nd5 mt-Nd4l
0.00136794	3	35	29.3103	Translation initiation factor binding	http://amigo.geneontology.org/amigo/term/GO:0031369	Rps24 Rps3a1 Rps19
0.0165566	2	25	27.3562	MRNA 5 -UTR binding	http://amigo.geneontology.org/amigo/term/GO:0048027	Rps14 Rpl26
0.0172396	2	26	26.3041	Neuropeptide hormone activity	http://amigo.geneontology.org/amigo/term/GO:0005184	Agrp Npy
0.0192623	2	28	24.4252	Actin monomer binding	http://amigo.geneontology.org/amigo/term/GO:0003785	Tmsb4x Tmsb10
2.61493e-05	5	73	23.4214	Oxidoreductase activity, acting on NAD(P)H	http://amigo.geneontology.org/amigo/term/GO:0016651	mt-Nd1 mt-Nd2 mt-Nd3 mt-Nd5 mt-Nd4l
3.2391e-06	6	89	23.053	Electron transfer activity	http://amigo.geneontology.org/amigo/term/GO:0009055	mt-Nd1 mt-Nd2 mt-Co1 mt-Nd3 mt-Nd5 mt-Nd4l
3.88604e-46	41	612	22.9086	Structural molecule activity	http://amigo.geneontology.org/amigo/term/GO:0005198	Rpl13 Rps11 Rpl8 Rplp1 Rpl19 Rps27a Rps14 Rps24 Rpl14 Rps3a1 Rps20 Rpsa Rps29 Fau Rps21 Rps19 Rpl21 Rpl37 Rpl18a Rpl37a Rpl27a Rpl9 Rps8 Rps23 Rps10 Rpl38 Rpl32 Rpl36 Rpl10-ps3 Rpl30 Rpl11 Rpl3 Rpl26 Rps12 Rpl34 Rpl17 Rps28 Rpl23 Rps27 Rpl41 Rpl24
0.000720451	4	76	17.9975	Enzyme inhibitor activity	http://amigo.geneontology.org/amigo/term/GO:0004857	Rps20 Rpl37 Rpl11 Rpl23
0.000192574	6	188	10.9134	Primary active transmembrane transporter activity	http://amigo.geneontology.org/amigo/term/GO:0015399	mt-Nd1 mt-Nd2 mt-Co1 mt-Nd3 mt-Nd5 mt-Nd4l
0.00481271	4	128	10.686	Molecular function inhibitor activity	http://amigo.geneontology.org/amigo/term/GO:0140678	Rps20 Rpl37 Rpl11 Rpl23
2.93803e-10	21	1163	6.17456	RNA binding	http://amigo.geneontology.org/amigo/term/GO:0003723	Rpl13 Rps11 Rpl8 Rpl19 Rps14 Rpl14 Rps3a1 Rps20 Eef1a1 Rps19 Rpl37 Rpl37a Rpl9 Rps10 Rpl30 Rpl11 Rpl3 Rpl26 Rpl23 Rps27 Rpl24
0.011491	5	291	5.87548	MRNA binding	http://amigo.geneontology.org/amigo/term/GO:0003729	Rps14 Rps3a1 Eef1a1 Rpl30 Rpl26
0.00881638	6	406	5.05349	Active transmembrane transporter activity	http://amigo.geneontology.org/amigo/term/GO:0022804	mt-Nd1 mt-Nd2 mt-Co1 mt-Nd3 mt-Nd5 mt-Nd4l
0.0049775	21	3484	2.06114	Nucleic acid binding	http://amigo.geneontology.org/amigo/term/GO:0003676	Rpl13 Rps11 Rpl8 Rpl19 Rps14 Rpl14 Rps3a1 Rps20 Eef1a1 Rps19 Rpl37 Rpl37a Rpl9 Rps10 Rpl30 Rpl11 Rpl3 Rpl26 Rpl23 Rps27 Rpl24

## Sheet: ShinyGo 0.75 - KEGG
Enrichment FDR	nGenes	Pathway Genes	Fold Enrichment	Pathway	URL	Genes
4.17985e-71	39	130	102.586	Ribosome	http://www.genome.jp/kegg-bin/show_pathway?mmu03010	Rpl13 Rps11 Rpl8 Rplp1 Rpl19 Rps27a Rps14 Rps24 Rpl14 Rps3a1 Rps20 Rpsa Rps29 Fau Rps21 Rps19 Rpl21 Rpl37 Rpl18a Rpl37a Rpl27a Rpl9 Rps23 Rps10 Rpl38 Rpl32 Rpl36 Rpl30 Rpl11 Rpl3 Rpl26 Rps12 Rpl34 Rpl17 Rps28 Rpl23 Rps27 Rpl41 Rpl24
1.09212e-62	40	231	59.2127	Coronavirus disease	http://www.genome.jp/kegg-bin/show_pathway?mmu05171	Rpl13 Rps11 Rpl8 Rplp1 Rpl19 Rps27a Rps14 Rps24 Rpl14 Rps3a1 Rps20 Rpsa Rps29 Fau Rps21 Rps19 Rpl21 Rpl37 Rpl18a Rpl37a Rpl27a Rpl9 Rps8 Rps23 Rps10 Rpl38 Rpl32 Rpl36 Rpl30 Rpl11 Rpl3 Rpl26 Rps12 Rpl34 Rpl17 Rps28 Rpl23 Rps27 Rpl41 Rpl24
3.62008e-05	6	133	15.4265	Oxidative phosphorylation	http://www.genome.jp/kegg-bin/show_pathway?mmu00190	mt-Nd1 mt-Nd2 mt-Co1 mt-Nd3 mt-Nd5 mt-Nd4l
0.00363359	3	71	14.4487	Adipocytokine signaling pathway	http://www.genome.jp/kegg-bin/show_pathway?mmu04920	Agrp Npy Irs4
0.0335774	2	56	12.2126	Regulation of lipolysis in adipocytes	http://www.genome.jp/kegg-bin/show_pathway?mmu04923	Npy Irs4
0.000368356	5	146	11.7107	Retrograde endocannabinoid signaling	http://www.genome.jp/kegg-bin/show_pathway?mmu04723	mt-Nd1 mt-Nd2 mt-Nd3 mt-Nd5 mt-Nd4l
0.000250584	6	204	10.0574	Diabetic cardiomyopathy	http://www.genome.jp/kegg-bin/show_pathway?mmu05415	mt-Nd1 mt-Nd2 mt-Co1 mt-Nd3 mt-Nd5 mt-Nd4l
0.000318505	6	220	9.32599	Chemical carcinogenesis	http://www.genome.jp/kegg-bin/show_pathway?mmu05208	mt-Nd1 mt-Nd2 mt-Co1 mt-Nd3 mt-Nd5 mt-Nd4l
0.000121398	7	262	9.13615	Parkinson disease	http://www.genome.jp/kegg-bin/show_pathway?mmu05012	Rps27a mt-Nd1 mt-Nd2 mt-Co1 mt-Nd3 mt-Nd5 mt-Nd4l
0.000332976	6	228	8.99877	Thermogenesis	http://www.genome.jp/kegg-bin/show_pathway?mmu04714	mt-Nd1 mt-Nd2 mt-Co1 mt-Nd3 mt-Nd5 mt-Nd4l
0.000544368	6	266	7.71323	Prion disease	http://www.genome.jp/kegg-bin/show_pathway?mmu05020	mt-Nd1 mt-Nd2 mt-Co1 mt-Nd3 mt-Nd5 mt-Nd4l
0.000948999	6	300	6.83906	Huntington disease	http://www.genome.jp/kegg-bin/show_pathway?mmu05016	mt-Nd1 mt-Nd2 mt-Co1 mt-Nd3 mt-Nd5 mt-Nd4l
0.000544368	7	380	6.29914	Alzheimer disease	http://www.genome.jp/kegg-bin/show_pathway?mmu05010	Irs4 mt-Nd1 mt-Nd2 mt-Co1 mt-Nd3 mt-Nd5 mt-Nd4l
0.00226827	6	365	5.62115	Amyotrophic lateral sclerosis	http://www.genome.jp/kegg-bin/show_pathway?mmu05014	mt-Nd1 mt-Nd2 mt-Co1 mt-Nd3 mt-Nd5 mt-Nd4l
0.00154006	7	469	5.10378	Pathways of neurodegeneration	http://www.genome.jp/kegg-bin/show_pathway?mmu05022	Rps27a mt-Nd1 mt-Nd2 mt-Co1 mt-Nd3 mt-Nd5 mt-Nd4l

## Sheet: ShinyGo 0.75 - Biocarta
None

## Sheet: ShinyGo 0.75 - Reactome
Enrichment FDR	nGenes	Pathway Genes	Fold Enrichment	Pathway	URL	Genes
7.99895e-74	38	96	135.356	SRP-dependent cotranslational protein targeting to membrane	https://reactome.org/download/current	Rpl13 Rps11 Rpl8 Rplp1 Rpl19 Rps27a Rps14 Rps24 Rpl14 Rps3a1 Rps20 Rpsa Rps29 Rps21 Rps19 Rpl21 Rpl37 Rpl18a Rpl27a Rpl9 Rps8 Rps23 Rps10 Rpl38 Rpl32 Rpl36 Rpl10-ps3 Rpl30 Rpl11 Rpl3 Rpl26 Rps12 Rpl34 Rpl17 Rps28 Rpl23 Rps27 Rpl24
7.99895e-74	38	97	133.961	Nonsense Mediated Decay NMD independent of the Exon Junction Complex EJC	https://reactome.org/download/current	Rpl13 Rps11 Rpl8 Rplp1 Rpl19 Rps27a Rps14 Rps24 Rpl14 Rps3a1 Rps20 Rpsa Rps29 Rps21 Rps19 Rpl21 Rpl37 Rpl18a Rpl27a Rpl9 Rps8 Rps23 Rps10 Rpl38 Rpl32 Rpl36 Rpl10-ps3 Rpl30 Rpl11 Rpl3 Rpl26 Rps12 Rpl34 Rpl17 Rps28 Rpl23 Rps27 Rpl24
1.44281e-72	38	104	124.944	Formation of a pool of free 40S subunits	https://reactome.org/download/current	Rpl13 Rps11 Rpl8 Rplp1 Rpl19 Rps27a Rps14 Rps24 Rpl14 Rps3a1 Rps20 Rpsa Rps29 Rps21 Rps19 Rpl21 Rpl37 Rpl18a Rpl27a Rpl9 Rps8 Rps23 Rps10 Rpl38 Rpl32 Rpl36 Rpl10-ps3 Rpl30 Rpl11 Rpl3 Rpl26 Rps12 Rpl34 Rpl17 Rps28 Rpl23 Rps27 Rpl24
7.62622e-71	38	114	113.984	L13a-mediated translational silencing of Ceruloplasmin expression	https://reactome.org/download/current	Rpl13 Rps11 Rpl8 Rplp1 Rpl19 Rps27a Rps14 Rps24 Rpl14 Rps3a1 Rps20 Rpsa Rps29 Rps21 Rps19 Rpl21 Rpl37 Rpl18a Rpl27a Rpl9 Rps8 Rps23 Rps10 Rpl38 Rpl32 Rpl36 Rpl10-ps3 Rpl30 Rpl11 Rpl3 Rpl26 Rps12 Rpl34 Rpl17 Rps28 Rpl23 Rps27 Rpl24
9.10125e-71	38	115	112.993	GTP hydrolysis and joining of the 60S ribosomal subunit	https://reactome.org/download/current	Rpl13 Rps11 Rpl8 Rplp1 Rpl19 Rps27a Rps14 Rps24 Rpl14 Rps3a1 Rps20 Rpsa Rps29 Rps21 Rps19 Rpl21 Rpl37 Rpl18a Rpl27a Rpl9 Rps8 Rps23 Rps10 Rpl38 Rpl32 Rpl36 Rpl10-ps3 Rpl30 Rpl11 Rpl3 Rpl26 Rps12 Rpl34 Rpl17 Rps28 Rpl23 Rps27 Rpl24
2.1046e-70	38	118	110.12	Nonsense-Mediated Decay NMD	https://reactome.org/download/current	Rpl13 Rps11 Rpl8 Rplp1 Rpl19 Rps27a Rps14 Rps24 Rpl14 Rps3a1 Rps20 Rpsa Rps29 Rps21 Rps19 Rpl21 Rpl37 Rpl18a Rpl27a Rpl9 Rps8 Rps23 Rps10 Rpl38 Rpl32 Rpl36 Rpl10-ps3 Rpl30 Rpl11 Rpl3 Rpl26 Rps12 Rpl34 Rpl17 Rps28 Rpl23 Rps27 Rpl24
2.1046e-70	38	118	110.12	Nonsense Mediated Decay NMD enhanced by the Exon Junction Complex EJC	https://reactome.org/download/current	Rpl13 Rps11 Rpl8 Rplp1 Rpl19 Rps27a Rps14 Rps24 Rpl14 Rps3a1 Rps20 Rpsa Rps29 Rps21 Rps19 Rpl21 Rpl37 Rpl18a Rpl27a Rpl9 Rps8 Rps23 Rps10 Rpl38 Rpl32 Rpl36 Rpl10-ps3 Rpl30 Rpl11 Rpl3 Rpl26 Rps12 Rpl34 Rpl17 Rps28 Rpl23 Rps27 Rpl24
7.41686e-70	38	122	106.51	Eukaryotic Translation Initiation	https://reactome.org/download/current	Rpl13 Rps11 Rpl8 Rplp1 Rpl19 Rps27a Rps14 Rps24 Rpl14 Rps3a1 Rps20 Rpsa Rps29 Rps21 Rps19 Rpl21 Rpl37 Rpl18a Rpl27a Rpl9 Rps8 Rps23 Rps10 Rpl38 Rpl32 Rpl36 Rpl10-ps3 Rpl30 Rpl11 Rpl3 Rpl26 Rps12 Rpl34 Rpl17 Rps28 Rpl23 Rps27 Rpl24
7.41686e-70	38	122	106.51	Cap-dependent Translation Initiation	https://reactome.org/download/current	Rpl13 Rps11 Rpl8 Rplp1 Rpl19 Rps27a Rps14 Rps24 Rpl14 Rps3a1 Rps20 Rpsa Rps29 Rps21 Rps19 Rpl21 Rpl37 Rpl18a Rpl27a Rpl9 Rps8 Rps23 Rps10 Rpl38 Rpl32 Rpl36 Rpl10-ps3 Rpl30 Rpl11 Rpl3 Rpl26 Rps12 Rpl34 Rpl17 Rps28 Rpl23 Rps27 Rpl24
1.13977e-27	16	53	103.231	Formation of the ternary complex and subsequently the 43S complex	https://reactome.org/download/current	Rps11 Rps27a Rps14 Rps24 Rps3a1 Rps20 Rpsa Rps29 Rps21 Rps19 Rps8 Rps23 Rps10 Rps12 Rps28 Rps27
9.43468e-27	16	60	91.1875	Translation initiation complex formation	https://reactome.org/download/current	Rps11 Rps27a Rps14 Rps24 Rps3a1 Rps20 Rpsa Rps29 Rps21 Rps19 Rps8 Rps23 Rps10 Rps12 Rps28 Rps27
9.43468e-27	16	60	91.1875	Ribosomal scanning and start codon recognition	https://reactome.org/download/current	Rps11 Rps27a Rps14 Rps24 Rps3a1 Rps20 Rpsa Rps29 Rps21 Rps19 Rps8 Rps23 Rps10 Rps12 Rps28 Rps27
1.2091e-26	16	61	89.6926	Activation of the mRNA upon binding of the cap-binding complex and eIFs and subsequent binding to 43S	https://reactome.org/download/current	Rps11 Rps27a Rps14 Rps24 Rps3a1 Rps20 Rpsa Rps29 Rps21 Rps19 Rps8 Rps23 Rps10 Rps12 Rps28 Rps27
1.64416e-62	38	181	71.7913	Major pathway of rRNA processing in the nucleolus and cytosol	https://reactome.org/download/current	Rpl13 Rps11 Rpl8 Rplp1 Rpl19 Rps27a Rps14 Rps24 Rpl14 Rps3a1 Rps20 Rpsa Rps29 Rps21 Rps19 Rpl21 Rpl37 Rpl18a Rpl27a Rpl9 Rps8 Rps23 Rps10 Rpl38 Rpl32 Rpl36 Rpl10-ps3 Rpl30 Rpl11 Rpl3 Rpl26 Rps12 Rpl34 Rpl17 Rps28 Rpl23 Rps27 Rpl24
1.64416e-62	38	181	71.7913	RRNA processing	https://reactome.org/download/current	Rpl13 Rps11 Rpl8 Rplp1 Rpl19 Rps27a Rps14 Rps24 Rpl14 Rps3a1 Rps20 Rpsa Rps29 Rps21 Rps19 Rpl21 Rpl37 Rpl18a Rpl27a Rpl9 Rps8 Rps23 Rps10 Rpl38 Rpl32 Rpl36 Rpl10-ps3 Rpl30 Rpl11 Rpl3 Rpl26 Rps12 Rpl34 Rpl17 Rps28 Rpl23 Rps27 Rpl24
1.64416e-62	38	181	71.7913	RRNA processing in the nucleus and cytosol	https://reactome.org/download/current	Rpl13 Rps11 Rpl8 Rplp1 Rpl19 Rps27a Rps14 Rps24 Rpl14 Rps3a1 Rps20 Rpsa Rps29 Rps21 Rps19 Rpl21 Rpl37 Rpl18a Rpl27a Rpl9 Rps8 Rps23 Rps10 Rpl38 Rpl32 Rpl36 Rpl10-ps3 Rpl30 Rpl11 Rpl3 Rpl26 Rps12 Rpl34 Rpl17 Rps28 Rpl23 Rps27 Rpl24
2.8341e-60	39	232	57.4835	Translation	https://reactome.org/download/current	Rpl13 Rps11 Rpl8 Rplp1 Rpl19 Rps27a Rps14 Rps24 Rpl14 Rps3a1 Rps20 Rpsa Rps29 Eef1a1 Rps21 Rps19 Rpl21 Rpl37 Rpl18a Rpl27a Rpl9 Rps8 Rps23 Rps10 Rpl38 Rpl32 Rpl36 Rpl10-ps3 Rpl30 Rpl11 Rpl3 Rpl26 Rps12 Rpl34 Rpl17 Rps28 Rpl23 Rps27 Rpl24
0.000315644	4	54	25.3299	Complex I biogenesis	https://reactome.org/download/current	mt-Nd1 mt-Nd2 mt-Nd3 mt-Nd5
1.62798e-43	38	539	24.108	Metabolism of RNA	https://reactome.org/download/current	Rpl13 Rps11 Rpl8 Rplp1 Rpl19 Rps27a Rps14 Rps24 Rpl14 Rps3a1 Rps20 Rpsa Rps29 Rps21 Rps19 Rpl21 Rpl37 Rpl18a Rpl27a Rpl9 Rps8 Rps23 Rps10 Rpl38 Rpl32 Rpl36 Rpl10-ps3 Rpl30 Rpl11 Rpl3 Rpl26 Rps12 Rpl34 Rpl17 Rps28 Rpl23 Rps27 Rpl24
0.000427911	4	59	23.1833	Respiratory electron transport	https://reactome.org/download/current	mt-Nd1 mt-Nd2 mt-Nd3 mt-Nd5
0.00163949	4	84	16.2835	Respiratory electron transport ATP synthesis by chemiosmotic coupling and heat production by uncoupling proteins.	https://reactome.org/download/current	mt-Nd1 mt-Nd2 mt-Nd3 mt-Nd5
0.00935715	4	134	10.2076	The citric acid TCA cycle and respiratory electron transport	https://reactome.org/download/current	mt-Nd1 mt-Nd2 mt-Nd3 mt-Nd5
1.56924e-27	40	1685	8.11758	Metabolism of proteins	https://reactome.org/download/current	Rpl13 Rps11 Rpl8 Rplp1 Rpl19 Rps27a Rps14 Rps24 Rpl14 Cst3 Rps3a1 Rps20 Rpsa Rps29 Eef1a1 Rps21 Rps19 Rpl21 Rpl37 Rpl18a Rpl27a Rpl9 Rps8 Rps23 Rps10 Rpl38 Rpl32 Rpl36 Rpl10-ps3 Rpl30 Rpl11 Rpl3 Rpl26 Rps12 Rpl34 Rpl17 Rps28 Rpl23 Rps27 Rpl24
