# Supplementary material for: Cell-specific transcriptome changes in the hypothalamic arcuate nucleus in a mouse deoxycorticosterone acetate-salt model of hypertension
Source: Front Cell Neurosci. 2023 May 24;17:1207350. doi: 10.3389/fncel.2023.1207350 (PMC10244568; doi:10.3389/fncel.2023.1207350)
Supplement: Supplementary file 10 [file Data_Sheet_10.XLSX]

## Sheet: Cluster 0 - Agrp.Npy.Sst.Lrp1b
Table S16 - DOCA DEG Results for All Neuropeptide-related Subclusters
	p_val	avg_log2FC	pct.1	pct.2	p_val_adj
Bc1	2.16466e-32	-0.12606	0.36	0.783	4.32932e-29
Cnp	2.82804e-32	-0.181605	0.214	0.69	5.65607e-29
Slc18a2	3.1629e-32	-0.196065	0.338	0.837	6.32581e-29
Psat1	3.65494e-30	-0.114522	0.144	0.601	7.30987e-27
Gria3	1.21643e-27	0.100054	0.613	0.921	2.43287e-24
Rmst	1.18927e-26	-0.115537	0.333	0.739	2.37855e-23
Rgs5	6.88326e-25	-0.129073	0.268	0.704	1.37665e-21
Soat1	2.75904e-24	-0.102542	0.144	0.522	5.51807e-21
Cep85l	7.14694e-23	-0.10554	0.319	0.744	1.42939e-19
Itga6	2.55859e-21	-0.121223	0.411	0.813	5.11718e-18
Fzd5	3.17507e-21	-0.1126	0.44	0.837	6.35015e-18
Serpina3n	4.82137e-21	-0.132779	0.516	0.887	9.64274e-18
Otud7b	1.14396e-19	-0.128775	0.178	0.542	2.28793e-16
Sep4	4.14254e-19	-0.124923	0.2	0.562	8.28509e-16
Tmod1	5.59382e-18	-0.100369	0.328	0.704	1.11876e-14
Ikzf2	2.8225e-16	-0.104309	0.241	0.591	5.645e-13
Pcp4	3.52793e-15	0.198973	0.659	0.808	7.05587e-12
Enpp2	2.54245e-14	-0.191921	0.336	0.67	5.08489e-11
Pmch	3.1323e-14	0.422151	0.173	0.335	6.2646e-11
Igf1r	5.38467e-14	-0.123158	0.28	0.586	1.07693e-10
Plce1	3.06961e-13	-0.107392	0.136	0.414	6.13922e-10
Gal	4.7867e-12	-0.161789	0.165	0.438	9.57341e-09
Kcnip3	1.09464e-11	-0.110221	0.355	0.65	2.18928e-08
Mlc1	1.1307e-11	-0.129439	0.214	0.498	2.2614e-08
Greb1	2.04349e-11	-0.15968	0.472	0.754	4.08698e-08
Arap2	7.99485e-11	-0.112539	0.161	0.409	1.59897e-07
Plekhb1	9.85469e-11	-0.19938	0.238	0.453	1.97094e-07
Cartpt	1.56474e-10	-0.22222	0.55	0.818	3.12948e-07
Prdx6	3.75166e-10	-0.174526	0.521	0.788	7.50331e-07
Qk	5.69592e-10	-0.280979	0.333	0.601	1.13918e-06
Utrn	1.02613e-09	-0.101721	0.209	0.453	2.05225e-06
Camk2n1	1.12419e-09	-0.105602	0.567	0.793	2.24838e-06
Ptn	1.42236e-09	-0.274934	0.321	0.591	2.84472e-06
Sned1	3.12391e-09	-0.107411	0.44	0.704	6.24782e-06
Gpm6b	3.3497e-09	-0.220827	0.409	0.67	6.6994e-06
Thsd7a	3.40022e-09	-0.203802	0.255	0.507	6.80044e-06
Tbx3	3.58834e-09	-0.119115	0.637	0.557	7.17668e-06
Tac2	5.76557e-09	-0.114118	0.182	0.404	1.15311e-05
Scd1	6.29516e-09	-0.119972	0.153	0.374	1.25903e-05
Timp3	6.5675e-09	-0.171443	0.453	0.453	1.3135e-05
Thy1	6.62995e-09	0.141361	0.526	0.626	1.32599e-05
Sv2c	7.15874e-09	-0.134599	0.577	0.818	1.43175e-05
AC149090.1	7.33406e-09	0.116948	0.869	0.961	1.46681e-05
Abca1	7.38872e-09	-0.159712	0.438	0.665	1.47774e-05
Grm5	7.88408e-09	-0.135797	0.355	0.581	1.57682e-05
Ednrb	1.26604e-08	-0.184728	0.275	0.404	2.53208e-05
Nfia	1.83683e-08	-0.141819	0.185	0.414	3.67366e-05
S100b	2.07555e-08	-0.145413	0.314	0.488	4.15111e-05
Rasgrp1	2.99705e-08	-0.135457	0.506	0.749	5.99409e-05
Paqr6	3.25159e-08	-0.111816	0.161	0.374	6.50318e-05
Pomc	3.41615e-08	-1.03234	0.513	0.443	6.83229e-05
Fut9	5.90202e-08	-0.117983	0.392	0.616	0.00011804
Gjc3	8.17084e-08	-0.109314	0.165	0.36	0.000163417
Acsl3	1.56308e-07	-0.16402	0.448	0.685	0.000312616
Resp18	2.06514e-07	0.274687	0.893	0.926	0.000413029
mt-Nd3	2.41139e-07	0.236887	0.735	0.813	0.000482278
Mag	2.59829e-07	-0.163087	0.265	0.473	0.000519657
Six3	2.97428e-07	-0.174624	0.467	0.571	0.000594856
Bsg	3.25547e-07	0.20809	0.759	0.783	0.000651093
Chgb	3.31005e-07	0.253006	0.713	0.759	0.00066201
Plp1	4.57942e-07	-0.550407	0.36	0.581	0.000915884
2310022B05Rik	4.83582e-07	-0.149542	0.192	0.399	0.000967163
Rxfp1	6.29075e-07	-0.129824	0.431	0.635	0.00125815
Ncam2	1.03596e-06	-0.172777	0.467	0.478	0.00207192
Aqp4	1.27403e-06	-0.134346	0.401	0.433	0.00254806
Crabp1	1.28479e-06	-0.123157	0.377	0.33	0.00256959
Ccnd2	1.32716e-06	-0.103308	0.231	0.399	0.00265433
Pitpnc1	1.3954e-06	-0.163092	0.562	0.768	0.0027908
Mal	1.56233e-06	-0.164753	0.112	0.281	0.00312467
Rgs2	1.70937e-06	-0.258963	0.504	0.645	0.00341874
Rpl10	1.82283e-06	0.115249	0.723	0.808	0.00364566
Atp1a2	2.25503e-06	-0.167166	0.523	0.734	0.00451006
Chpt1	2.36909e-06	-0.100074	0.307	0.517	0.00473818
Scg2	5.34741e-06	0.242587	0.932	0.975	0.0106948
Slc6a11	7.70679e-06	-0.172127	0.416	0.621	0.0154136
Mt2	8.7575e-06	-0.166909	0.348	0.512	0.017515
Slc7a10	1.23651e-05	-0.111199	0.377	0.384	0.0247301
Trf	1.34785e-05	-0.208847	0.151	0.296	0.026957
Mobp	1.87738e-05	-0.163356	0.255	0.443	0.0375476
Sparcl1	1.93902e-05	-0.176408	0.547	0.739	0.0387804

## Sheet: Cluster 1 - Lamp5.Tcf7l2
	p_val	avg_log2FC	pct.1	pct.2	p_val_adj
Serpina3n	2.14e-90	0.107471	0.298	0.963	4.27e-87
Penk	1.41e-89	0.233862	0.323	0.872	2.83e-86
Brinp3	4.05e-56	-0.105043	0.262	0.849	8.11e-53
Ddhd1	6.78e-52	-0.19424	0.27	0.821	1.36e-48
Ptprt	2.6e-47	-0.11858	0.331	0.872	5.2e-44
Arrdc3	4.53e-47	-0.100643	0.127	0.683	9.06e-44
Col11a1	3.14e-42	0.107627	0.344	0.794	6.27e-39
Car10	2.25e-38	-0.1973	0.178	0.693	4.5e-35
Bcl2	4.78e-37	-0.102265	0.135	0.583	9.56e-34
Fnbp1	1.28e-36	-0.108889	0.27	0.748	2.56e-33
Tcf7l2	1.42e-36	-0.148809	0.346	0.839	2.84e-33
Col25a1	3.94e-33	-0.134354	0.28	0.743	7.89e-30
Grin3a	2.31e-29	-0.131923	0.188	0.638	4.63e-26
Stmn4	8.38e-26	-0.13129	0.468	0.849	1.68e-22
Calb2	2.74e-25	-0.112135	0.308	0.697	5.48e-22
Ndrg1	9.35e-24	-0.104854	0.145	0.528	1.87e-20
Sparc	2.75e-23	-0.130261	0.44	0.807	5.5e-20
Ptgds	7.48e-23	0.218235	0.247	0.573	1.5e-19
Hlf	1.63e-22	-0.124315	0.168	0.518	3.27e-19
Tac1	2.5e-22	-0.112863	0.237	0.624	5.01e-19
Ar	2.67e-19	-0.161263	0.265	0.619	5.34e-16
mt-Atp8	2.23e-18	0.117426	0.333	0.615	4.47e-15
mt-Nd3	2.39e-18	0.114327	0.59	0.807	4.77e-15
Ptprz1	6.35e-18	0.116542	0.73	0.94	1.27e-14
Plp1	1.17e-16	-0.185159	0.191	0.514	2.33e-13
Glul	5.13e-16	0.126533	0.321	0.518	1.03e-12
Chpt1	5.65e-16	-0.123589	0.308	0.619	1.13e-12
Ncam2	1.51e-15	-0.120063	0.275	0.578	3.03e-12
Rxfp1	1.6e-15	-0.246315	0.186	0.505	3.21e-12
Vsnl1	2.01e-14	0.102198	0.44	0.619	4.02e-11
Tac2	4.72e-14	-0.154982	0.17	0.459	9.43e-11
Cpne7	8.58e-14	0.125302	0.412	0.592	1.72e-10
Pomc	2.87e-13	-0.585985	0.407	0.72	5.74e-10
Chgb	3.22e-13	0.108574	0.573	0.743	6.44e-10
Vgf	6.23e-13	0.420996	0.527	0.61	1.25e-09
AY036118	6.59e-13	-0.105205	0.288	0.583	1.32e-09
Sned1	9.32e-13	-0.11677	0.219	0.514	1.86e-09
Son	1.69e-12	0.141194	0.636	0.803	3.38e-09
Cartpt	2.7e-12	-0.10051	0.463	0.72	5.39e-09
mt-Nd5	3.52e-12	0.306539	0.835	0.917	7.04e-09
Alcam	3.89e-12	0.205103	0.646	0.766	7.78e-09
Ndn	9.16e-12	-0.117489	0.835	0.991	1.83e-08
Mobp	1.36e-11	-0.100208	0.112	0.349	2.72e-08
Scg2	1.63e-11	0.211412	0.893	0.977	3.25e-08
Gad2	2.53e-11	0.150418	0.621	0.766	5.05e-08
Celf4	2.79e-11	0.176403	0.906	0.991	5.58e-08
Sash1	4.41e-11	-0.102947	0.12	0.353	8.83e-08
Macf1	8.73e-11	0.122476	0.756	0.899	1.75e-07
Greb1	1.14e-10	-0.13252	0.282	0.56	2.29e-07
Nfia	1.2e-10	-0.12567	0.158	0.404	2.39e-07
Nfix	1.85e-10	-0.117895	0.094	0.312	3.71e-07
Epha5	2.58e-10	-0.162026	0.308	0.564	5.17e-07
Asrgl1	2.79e-10	-0.110059	0.237	0.495	5.58e-07
Esr1	3.6e-10	-0.178498	0.344	0.619	7.2e-07
Pam	7.22e-10	0.203367	0.547	0.651	1.44e-06
Mt3	1.08e-09	0.101329	0.669	0.803	2.16e-06
Ywhag	3.81e-09	0.18759	0.812	0.894	7.62e-06
Ttyh1	3.9e-09	-0.124887	0.321	0.56	7.81e-06
Utrn	6.77e-09	-0.158945	0.234	0.477	1.35e-05
Syt1	1.21e-08	0.180413	0.751	0.839	2.42e-05
Fstl5	2.1e-08	-0.132654	0.282	0.523	4.21e-05
Chchd10	3.55e-08	0.107205	0.392	0.514	7.1e-05
Unc5b	7.08e-08	-0.162428	0.221	0.413	0.000141595
Tenm1	7.14e-08	-0.167721	0.443	0.67	0.000142842
Bsg	1.35e-07	0.120014	0.723	0.812	0.000269016
Sparcl1	1.39e-07	-0.113279	0.379	0.601	0.000277906
Igfbp5	1.5e-07	-0.122881	0.097	0.266	0.000299409
Dner	2.39e-07	0.129854	0.55	0.642	0.000477657
Gad1	2.59e-07	0.118395	0.565	0.683	0.000518902
Ctsd	2.87e-07	0.124995	0.583	0.67	0.000574787
Rmst	3.01e-07	-0.117217	0.346	0.569	0.000602041
Zwint	3.43e-07	0.164699	0.913	0.968	0.000685211
Rpl34	3.6e-07	-0.170276	0.667	0.858	0.000719083
Nrxn3	4.13e-07	0.172678	0.71	0.807	0.000825141
Calm1	4.29e-07	0.173547	0.962	1	0.00085716
Rab3c	4.74e-07	0.11892	0.906	0.977	0.000947951
Mt1	6e-07	-0.100018	0.3	0.5	0.0011992
Actb	9.83e-07	0.257262	0.934	0.986	0.00196529
Rpl36	1.1e-06	0.160796	0.791	0.858	0.00219466
Camk2d	1.65e-06	0.102079	0.585	0.716	0.00329608
Rps14	1.91e-06	-0.135383	0.789	0.936	0.00382071
Rps19	2.71e-06	-0.164208	0.819	0.954	0.00541618
Six3	3.79e-06	-0.16602	0.242	0.436	0.00758014
mt-Nd1	4.36e-06	0.251162	0.967	1	0.00872339
Rpl3	5.63e-06	-0.176973	0.817	0.95	0.0112625
Tead1	5.87e-06	-0.156772	0.265	0.454	0.0117322
Gria2	8.15e-06	0.194357	0.908	0.94	0.0163017
Syne1	9.4e-06	0.155619	0.72	0.798	0.0188039
Ncam1	1.03e-05	0.134755	0.921	0.977	0.02064
Rpl32	1.42e-05	0.111436	0.763	0.844	0.0284105
Resp18	1.45e-05	0.112548	0.751	0.835	0.0290768
Pcdh9	1.79e-05	0.119575	0.486	0.578	0.0357015
Rps8	2.06e-05	-0.109312	0.939	1	0.041207

## Sheet: Cluster 2 - Agrp.Npy.Acvr1c
	p_val	avg_log2FC	pct.1	pct.2	p_val_adj
Pomc	5.83369e-18	-0.590193	0.13	0.497	1.16674e-14
Sparc	2.2763e-20	-0.300184	0.342	0.762	4.5526e-17
Pcdh10	1.82043e-12	-0.27271	0.146	0.444	3.64086e-09
Nap1l5	4.70762e-06	-0.248088	0.971	1	0.00941523
Cartpt	1.3223e-14	-0.240529	0.212	0.536	2.6446e-11
Sparcl1	1.70736e-13	-0.230895	0.273	0.603	3.41473e-10
Cited1	1.39753e-17	-0.229868	0.565	0.901	2.79507e-14
Bc1	7.13408e-45	-0.22295	0.284	0.848	1.42682e-41
Mbp	9.42317e-14	-0.218855	0.233	0.57	1.88463e-10
Tmsb4x	1.31866e-05	-0.217012	0.862	0.98	0.0263731
Ywhag	8.79949e-10	-0.209175	0.7	0.934	1.7599e-06
Gap43	5.66432e-21	-0.208241	0.43	0.828	1.13286e-17
Lsamp	6.9889e-07	-0.205886	0.658	0.874	0.00139778
Aldoc	6.36067e-08	-0.200116	0.332	0.583	0.000127213
Rpl14	4.25265e-08	-0.189907	0.785	0.967	8.5053e-05
Dmd	5.7244e-17	-0.186097	0.589	0.907	1.14488e-13
5031439G07Rik	1.724e-64	-0.183755	0.233	0.907	3.448e-61
Prlr	2.40145e-08	-0.182728	0.098	0.311	4.8029e-05
Pik3r1	3.60344e-29	-0.178537	0.175	0.623	7.20687e-26
Isl1	1.59051e-16	-0.177016	0.398	0.735	3.18102e-13
Slc4a4	6.9911e-19	-0.174441	0.156	0.503	1.39822e-15
Pcdh9	2.40754e-17	-0.174305	0.634	0.94	4.81507e-14
Gpx3	4.85202e-06	-0.17374	0.615	0.821	0.00970403
Id4	5.15591e-64	-0.171219	0.151	0.834	1.03118e-60
Spock1	3.03647e-21	-0.170029	0.345	0.722	6.07294e-18
Map7	4.08807e-07	-0.165845	0.363	0.596	0.000817613
Syne1	8.33971e-07	-0.163842	0.581	0.801	0.00166794
Otp	8.48693e-15	-0.161756	0.671	0.947	1.69739e-11
Sema6a	4.55917e-16	-0.158303	0.196	0.517	9.11835e-13
Ildr2	2.97351e-17	-0.15824	0.268	0.609	5.94701e-14
Timp3	3.0986e-16	-0.156436	0.143	0.457	6.1972e-13
Csgalnact1	6.47662e-56	-0.156095	0.265	0.881	1.29532e-52
Gabrb1	2.19571e-08	-0.15433	0.475	0.722	4.39142e-05
mt-Nd6	7.08488e-68	-0.151311	0.178	0.868	1.41698e-64
Kcnj10	4.05143e-11	-0.151217	0.098	0.344	8.10285e-08
Auts2	1.73548e-07	-0.149926	0.541	0.768	0.000347095
Sv2c	2.01787e-84	-0.147506	0.212	0.967	4.03575e-81
Pou2f2	6.86839e-11	-0.146168	0.313	0.596	1.37368e-07
Mlc1	2.4872e-13	-0.146069	0.034	0.265	4.9744e-10
Tubb2b	8.22156e-14	-0.144487	0.212	0.51	1.64431e-10
Apoe	3.80655e-20	-0.143462	0.411	0.788	7.6131e-17
Gal	6.0179e-18	-0.142914	0.053	0.344	1.20358e-14
Qk	1.95147e-14	-0.142911	0.17	0.47	3.90294e-11
Ifi27	1.5262e-40	-0.141794	0.034	0.523	3.0524e-37
Marcks	6.04747e-08	-0.136011	0.483	0.722	0.000120949
Gfap	1.75953e-26	-0.133472	0.021	0.371	3.51906e-23
Sox9	9.25769e-32	-0.132852	0.024	0.424	1.85154e-28
Tmem47	1.3372e-14	-0.132322	0.141	0.424	2.6744e-11
Mobp	2.79217e-17	-0.132094	0.072	0.384	5.58433e-14
Gabre	5.12905e-08	-0.131365	0.3	0.543	0.000102581
Pcdh19	1.68224e-17	-0.128717	0.103	0.404	3.36449e-14
4930447C04Rik	1.08549e-08	-0.128343	0.308	0.55	2.17098e-05
Celf2	1.27626e-13	-0.12764	0.3	0.596	2.55252e-10
Ikzf2	2.14637e-47	-0.127195	0.069	0.623	4.29273e-44
Scn9a	2.01697e-06	-0.125194	0.541	0.748	0.00403394
Ppp2r5a	1.58019e-79	-0.124771	0.045	0.801	3.16038e-76
Sema6d	2.44908e-38	-0.124471	0.111	0.603	4.89816e-35
Plp1	3.22236e-25	-0.124339	0.175	0.609	6.44472e-22
Paqr8	4.81319e-62	-0.123933	0.069	0.722	9.62639e-59
Mpp6	1.87631e-45	-0.123674	0.09	0.636	3.75263e-42
Sema5a	3.57327e-20	-0.122672	0.114	0.45	7.14655e-17
Rnf128	1.00882e-50	-0.122091	0.066	0.636	2.01764e-47
Gpr83	8.76011e-93	-0.120266	0.05	0.868	1.75202e-89
Pbxip1	5.56928e-12	-0.119748	0.085	0.331	1.11386e-08
Stmn4	1.24504e-54	-0.11965	0.305	0.894	2.49009e-51
Rbfox1	1.2911e-16	-0.117647	0.069	0.351	2.58219e-13
Camkv	1.05153e-65	-0.117496	0.257	0.914	2.10306e-62
Cplx2	2.44783e-13	-0.117028	0.292	0.583	4.89565e-10
Pdyn	9.95693e-57	-0.117019	0.061	0.675	1.99139e-53
Tubb3	2.09312e-20	-0.116792	0.451	0.801	4.18625e-17
Snca	1.16751e-50	-0.115781	0.133	0.709	2.33501e-47
Atp2b1	3.74611e-12	-0.114608	0.448	0.735	7.49221e-09
Ncald	1.5989e-08	-0.114023	0.403	0.642	3.1978e-05
Plcl1	1.09398e-46	-0.113033	0.149	0.702	2.18797e-43
Hpcal1	2.3734e-28	-0.112731	0.08	0.483	4.74679e-25
Car10	2.03143e-05	-0.111633	0.355	0.55	0.0406286
Calb2	3.74476e-28	-0.110859	0.218	0.629	7.48951e-25
Ppp3ca	2.25487e-15	-0.109335	0.552	0.861	4.50974e-12
Hs6st2	2.19948e-07	-0.108985	0.451	0.669	0.000439896
Slc32a1	2.16065e-10	-0.108102	0.316	0.57	4.3213e-07
Erbin	5.02642e-55	-0.107382	0.101	0.709	1.00528e-51
Pnoc	1.61713e-38	-0.105343	0.064	0.536	3.23427e-35
Fut9	1.95453e-44	-0.104985	0.252	0.788	3.90906e-41
2310022B05Rik	5.1491e-33	-0.104866	0.045	0.464	1.02982e-29
Pex5l	5.2857e-87	-0.104834	0.069	0.854	1.05714e-83
Ctsz	6.41346e-26	-0.104345	0.114	0.497	1.28269e-22
Ghrh	5.44794e-45	-0.102545	0.024	0.536	1.08959e-41
Epas1	4.05899e-19	-0.102395	0.011	0.265	8.11797e-16
Vgf	7.7471e-09	-0.102359	0.154	0.358	1.54942e-05
Nnat	8.11893e-20	-0.102259	0.379	0.755	1.62379e-16
Mt2	1.47052e-11	-0.102068	0.098	0.331	2.94104e-08
Syn2	1.55976e-17	-0.101924	0.424	0.748	3.11952e-14
Ar	8.43393e-07	-0.101849	0.21	0.411	0.00168679
Pde4b	5.94257e-29	-0.100371	0.061	0.45	1.18851e-25
Son	4.32598e-20	0.102026	0.536	0.815	8.65197e-17
Rreb1	5.46446e-06	0.102614	0.305	0.397	0.0109289
Lcorl	1.12803e-06	0.105156	0.334	0.444	0.00225606
Acsl3	1.05202e-05	0.106011	0.194	0.291	0.0210403
Tmem176b	5.53474e-08	0.109386	0.289	0.404	0.000110695
Tac1	4.68172e-33	0.112001	0.127	0.497	9.36344e-30
Rpl26	2.58515e-10	0.112285	0.711	0.874	5.1703e-07
Macf1	5.02287e-12	0.114096	0.639	0.821	1.00457e-08
Chchd10	2.84188e-10	0.114377	0.361	0.51	5.68376e-07
Bex2	3.8477e-09	0.116234	0.862	0.98	7.6954e-06
Pcp4	7.26031e-09	0.118241	0.626	0.762	1.45206e-05
Nrxn3	1.10355e-05	0.119426	0.621	0.722	0.022071
Camk2d	3.06652e-17	0.12175	0.443	0.669	6.13303e-14
Rpl11	1.86957e-05	0.129101	0.851	0.927	0.0373913
2900097C17Rik	1.28192e-17	0.129272	0.676	0.901	2.56384e-14
Cst3	1.26218e-10	0.13056	0.851	0.987	2.52436e-07
Chgb	5.36996e-14	0.130829	0.31	0.517	1.07399e-10
Gad1	2.51472e-17	0.135947	0.419	0.656	5.02943e-14
Atp1a1	1.9156e-14	0.14012	0.74	0.914	3.83119e-11
Aatk	3.25907e-09	0.142237	0.408	0.53	6.51814e-06
mt-Nd5	6.07454e-17	0.151412	0.751	0.947	1.21491e-13
Arhgap6	5.30715e-16	0.152661	0.589	0.788	1.06143e-12
Gabrg1	8.43761e-11	0.156388	0.305	0.43	1.68752e-07
Rpl24	2.14265e-15	0.161457	0.764	0.934	4.2853e-12
App	2.15595e-09	0.161594	0.854	0.96	4.3119e-06
Rps21	8.88389e-10	0.161682	0.875	0.98	1.77678e-06
Pam	6.64445e-06	0.162583	0.549	0.629	0.0132889
Ndn	9.8791e-09	0.177374	0.846	0.96	1.97582e-05
Rtn1	2.46181e-08	0.185931	0.931	1	4.92363e-05
Rpl3	3.20246e-09	0.189679	0.854	0.954	6.40491e-06
Itm2c	1.29846e-05	0.190465	0.82	0.874	0.0259692
Rpsa	3.95843e-11	0.192362	0.851	0.967	7.91685e-08
Rpl21	2.74439e-11	0.194101	0.894	0.993	5.48878e-08
Rpl38	5.33124e-13	0.197452	0.881	0.993	1.06625e-09
Prune2	4.78493e-10	0.207707	0.79	0.907	9.56987e-07
Pcdh17	7.48526e-22	0.208099	0.639	0.861	1.49705e-18
Ptgds	1.58028e-39	0.210353	0.151	0.623	3.16056e-36
Lars2	2.66669e-21	0.213966	0.504	0.735	5.33338e-18
Rpl27a	2.11909e-14	0.222561	0.809	0.94	4.23818e-11
Cspg5	4.34792e-17	0.247279	0.469	0.623	8.69585e-14
Tuba1a	2.19233e-20	0.263776	0.599	0.788	4.38465e-17

## Sheet: Cluster 3 - Syt1.Six3
	p_val	avg_log2FC	pct.1	pct.2	p_val_adj
Psat1	5.02e-42	-0.107269	0.064	0.701	1e-38
Bc1	2.31e-25	0.125444	0.381	0.729	4.61e-22
Slc18a2	6.91e-24	-0.138153	0.208	0.748	1.38e-20
Igf1r	8.96e-23	-0.165119	0.25	0.757	1.79e-19
Asb4	1.4e-20	-0.164096	0.394	0.869	2.8e-17
Fam107a	4.97e-20	-0.124238	0.288	0.785	9.95e-17
Lmo3	1e-19	-0.101532	0.285	0.748	2e-16
Htr2c	4.97e-19	-0.221808	0.369	0.841	9.95e-16
Calcr	8.55e-19	-0.119063	0.183	0.664	1.71e-15
Bcl11b	1.75e-18	0.141916	0.5	0.85	3.51e-15
Gabrg1	2.14e-18	-0.180182	0.391	0.841	4.27e-15
Arhgap23	3.61e-18	-0.122589	0.224	0.692	7.23e-15
Rnf128	2.64e-17	-0.10691	0.353	0.785	5.28e-14
Dlx6os1	4.04e-17	-0.113125	0.218	0.664	8.07e-14
Greb1	9.43e-17	-0.102996	0.186	0.636	1.89e-13
Sema6a	4.44e-15	-0.108574	0.276	0.692	8.87e-12
Npy2r	6.9e-15	-0.110582	0.16	0.57	1.38e-11
Itih3	1.33e-14	-0.188315	0.131	0.505	2.67e-11
Tmem176b	1.76e-14	-0.138108	0.212	0.607	3.52e-11
Prune2	4.31e-14	-0.100133	0.426	0.804	8.62e-11
Satb1	5.29e-14	0.166389	0.327	0.617	1.06e-10
Thy1	9.63e-14	0.178057	0.609	0.832	1.93e-10
Aatk	1.54e-13	0.19123	0.567	0.72	3.08e-10
Kcnq3	1.56e-13	-0.234986	0.333	0.748	3.11e-10
Onecut2	9.84e-13	-0.135194	0.042	0.318	1.97e-09
Sned1	6.97e-12	-0.127786	0.147	0.505	1.39e-08
Esr1	8.62e-12	-0.174583	0.196	0.57	1.72e-08
Sparcl1	1.72e-11	-0.141795	0.397	0.729	3.45e-08
Marcks	2.74e-11	0.191224	0.66	0.832	5.48e-08
Slc25a18	2.92e-11	-0.124758	0.071	0.364	5.84e-08
Rora	4.26e-11	-0.186657	0.179	0.523	8.52e-08
Ildr2	4.74e-11	-0.1471	0.468	0.813	9.49e-08
Ctsd	6.73e-11	0.175861	0.609	0.729	1.35e-07
Rpl10	1.15e-10	0.126373	0.538	0.72	2.3e-07
Foxn3	1.38e-10	-0.103582	0.317	0.654	2.75e-07
Rpl32	1.63e-10	0.227766	0.747	0.85	3.26e-07
Ncdn	1.68e-10	0.104284	0.702	0.897	3.35e-07
Epha5	2.57e-10	0.156184	0.587	0.813	5.15e-07
mt-Nd3	2.91e-10	0.144202	0.542	0.738	5.83e-07
Otp	3.42e-10	0.156135	0.702	0.888	6.85e-07
Nefm	8.54e-10	-0.146569	0.205	0.542	1.71e-06
Elmo1	1.1e-09	0.125609	0.394	0.626	2.2e-06
Gpc3	1.17e-09	-0.147013	0.157	0.467	2.35e-06
Snca	1.5e-09	0.10205	0.628	0.832	3e-06
Rpl34	3.21e-09	0.25779	0.631	0.701	6.41e-06
Aplp1	3.24e-09	0.201612	0.753	0.879	6.49e-06
Luzp2	4.26e-09	-0.252444	0.179	0.486	8.52e-06
Agt	9.57e-09	-0.101934	0.163	0.439	1.91e-05
Plp1	1.15e-08	-0.182058	0.192	0.495	2.29e-05
Mt1	1.65e-08	-0.130152	0.288	0.57	3.3e-05
Mobp	2.2e-08	-0.162	0.106	0.364	4.4e-05
Tubb3	2.98e-08	0.187408	0.679	0.804	5.96e-05
Rps3a1	3e-08	0.102858	0.744	0.897	6e-05
Ptma	3.34e-08	-0.149995	0.583	0.85	6.68e-05
Rps29	4.01e-08	0.119423	0.862	0.991	8.01e-05
Tmsb10	4.68e-08	0.157571	0.728	0.869	9.35e-05
Calb2	5.24e-08	-0.233542	0.237	0.533	0.000104896
B3gat2	5.33e-08	-0.112296	0.106	0.364	0.000106608
Cadps2	6.9e-08	0.237022	0.481	0.607	0.000138015
Ptprz1	7.63e-08	-0.10085	0.397	0.682	0.000152695
Rpl38	1.18e-07	0.185558	0.849	0.963	0.00023599
Aqp4	1.52e-07	-0.124211	0.131	0.393	0.000303595
Rpl11	1.59e-07	-0.173485	0.837	1	0.000318967
Thsd7a	1.79e-07	-0.293261	0.192	0.458	0.000357828
Tubb4a	2e-07	-0.136799	0.474	0.729	0.000399767
Rpl23	3.06e-07	-0.119196	0.824	0.991	0.000612491
Camkv	4.91e-07	0.112651	0.558	0.72	0.000981032
Bsg	6.32e-07	0.147971	0.708	0.813	0.00126424
Pomc	7.62e-07	-0.401692	0.199	0.467	0.001524
Sv2c	7.7e-07	-0.103335	0.221	0.495	0.0015395
Gria3	8.58e-07	0.121383	0.721	0.869	0.00171503
Bex2	9.01e-07	0.172006	0.917	1	0.00180262
mt-Nd5	1.4e-06	0.118521	0.737	0.897	0.00279696
Rpl26	1.41e-06	0.240763	0.708	0.776	0.00281291
Slit2	1.54e-06	-0.217668	0.144	0.364	0.00308321
Mal	1.67e-06	-0.124297	0.074	0.271	0.00334361
Rbms3	3.43e-06	-0.109516	0.285	0.551	0.00686127
Dgkk	3.63e-06	-0.129862	0.224	0.486	0.00726558
Kcnk9	3.9e-06	-0.199648	0.24	0.505	0.00779581
Nrp2	4.03e-06	-0.162648	0.381	0.654	0.00805407
Gpx3	5.11e-06	-0.152141	0.487	0.738	0.0102253
Cst3	5.48e-06	-0.117102	0.734	0.935	0.010967
Unc5d	6.21e-06	-0.137402	0.587	0.822	0.0124205
S100b	7.64e-06	-0.178018	0.17	0.374	0.0152708
Celf2	8.06e-06	0.120399	0.747	0.869	0.0161255
Vsnl1	1.29e-05	-0.153661	0.66	0.869	0.0257116
Gpr101	1.43e-05	-0.107209	0.397	0.645	0.0285045
Auts2	1.48e-05	0.124961	0.452	0.607	0.0295261
Chchd10	1.91e-05	0.129659	0.51	0.626	0.0381525
Alcam	2.24e-05	0.108935	0.381	0.523	0.0448802

## Sheet: Cluster 4 - KNDy
	p_val	avg_log2FC	pct.1	pct.2	p_val_adj
C1ql2	6.93e-61	-0.158241	0.205	0.93	1.39e-57
Rgs4	1.65e-60	-0.151051	0.191	0.922	3.29e-57
Cald1	2.52e-56	-0.11543	0.025	0.719	5.03e-53
Cadps2	3.28e-55	-0.147888	0.09	0.805	6.55e-52
Syt2	9.34e-48	-0.11084	0.054	0.695	1.87e-44
Erbb4	3.24e-45	-0.178648	0.119	0.766	6.47e-42
Prex2	5.75e-43	-0.104711	0.05	0.641	1.15e-39
Prdx6	6.77e-43	-0.197324	0.313	0.922	1.35e-39
Isl1	9.48e-43	-0.100713	0.086	0.688	1.9e-39
Ncdn	1.56e-42	-0.238632	0.219	0.852	3.12e-39
Tspan2	1.1e-40	-0.117006	0.054	0.633	2.19e-37
Igf1r	1.15e-40	-0.131641	0.356	0.922	2.29e-37
AY036118	4.5e-40	-0.15661	0.18	0.773	8.99e-37
Abca2	7.9e-40	0.101485	0.331	0.805	1.58e-36
Car10	4.81e-39	-0.189329	0.072	0.656	9.61e-36
Pmepa1	1.27e-37	-0.138116	0.14	0.711	2.53e-34
Sned1	1.89e-37	-0.233182	0.32	0.898	3.77e-34
Serpine2	8.99e-36	-0.108458	0.129	0.672	1.8e-32
Ntsr2	1.7e-34	-0.161618	0.097	0.641	3.4e-31
Jun	2.31e-34	-0.10008	0.097	0.625	4.61e-31
Gabra1	1.06e-33	-0.109384	0.112	0.633	2.12e-30
Rnf128	1.24e-33	-0.119339	0.108	0.633	2.48e-30
Nr2f2	1.8e-33	-0.111622	0.014	0.492	3.6e-30
Map7	1.83e-33	-0.120443	0.277	0.797	3.66e-30
Hcn1	3.23e-33	-0.127524	0.381	0.891	6.45e-30
Gabrg1	1.05e-32	-0.130037	0.403	0.906	2.11e-29
Col23a1	2.29e-32	-0.114935	0.072	0.578	4.58e-29
Ptgds	2.17e-31	0.144316	0.165	0.617	4.34e-28
St8sia4	4.26e-30	-0.120965	0.058	0.531	8.53e-27
Bc1	5.91e-30	0.122695	0.252	0.664	1.18e-26
Ildr2	6.74e-30	-0.20524	0.216	0.742	1.35e-26
Tead1	7.01e-28	-0.128806	0.169	0.648	1.4e-24
Nts	2.04e-27	-0.111379	0.014	0.422	4.08e-24
Golim4	2.69e-26	-0.284918	0.14	0.641	5.37e-23
Pcdh9	4.43e-24	-0.147843	0.414	0.852	8.85e-21
Plod1	1.02e-23	-0.147946	0.058	0.469	2.03e-20
Atp1b2	2.39e-23	-0.136894	0.065	0.477	4.78e-20
Opcml	3.88e-23	-0.143663	0.216	0.656	7.76e-20
Cd81	9.79e-23	-0.279839	0.468	0.914	1.96e-19
Tubb3	1.09e-22	-0.291417	0.471	0.922	2.18e-19
Camk2d	2.36e-21	-0.249781	0.388	0.836	4.71e-18
Gm3764	3.92e-21	-0.12196	0.029	0.375	7.84e-18
Rab3c	1.04e-20	-0.101047	0.665	0.992	2.07e-17
Pcdh10	1.82e-19	-0.153394	0.586	0.945	3.65e-16
Cspg5	2.94e-19	-0.123466	0.464	0.844	5.88e-16
Lypd1	1.13e-18	-0.115771	0.029	0.352	2.26e-15
Rpl17	7.03e-18	0.296193	0.604	0.797	1.41e-14
Unc5d	1.18e-17	-0.321151	0.576	0.953	2.36e-14
Rbms3	1.9e-17	-0.173299	0.576	0.93	3.81e-14
Oxt	2.89e-17	-0.433334	0.004	0.258	5.77e-14
Rrbp1	3.18e-17	-0.172837	0.306	0.695	6.36e-14
Pcp4	1.13e-16	0.168117	0.36	0.641	2.27e-13
Six3	1.72e-16	-0.228956	0.047	0.375	3.44e-13
mt-Atp8	3.24e-16	-0.146317	0.281	0.672	6.48e-13
Vsnl1	6.43e-16	-0.11048	0.266	0.617	1.29e-12
Cdc37l1	2.45e-15	-0.160192	0.331	0.695	4.89e-12
Glul	2.47e-15	-0.159	0.291	0.656	4.94e-12
Pde4b	3.82e-15	-0.123404	0.345	0.695	7.64e-12
Atp1a2	3.27e-13	-0.269789	0.331	0.695	6.54e-10
Pomc	4.31e-13	-0.144608	0.169	0.492	8.63e-10
Slc17a6	8.01e-13	0.107291	0.579	0.805	1.6e-09
Bsg	1.31e-12	-0.101097	0.59	0.875	2.62e-09
Pdyn	1.52e-12	0.139143	0.565	0.781	3.05e-09
Basp1	1.75e-12	0.209986	0.712	0.875	3.5e-09
Lsamp	1.95e-12	0.137292	0.781	0.961	3.9e-09
Apoe	2.15e-12	0.13384	0.529	0.758	4.31e-09
AC149090.1	2.52e-12	-0.194535	0.737	0.984	5.03e-09
Esr1	4.07e-12	-0.111875	0.406	0.711	8.15e-09
Col11a1	9.14e-12	0.126992	0.27	0.477	1.83e-08
Scd2	1.01e-11	-0.123462	0.561	0.859	2.01e-08
mt-Nd5	1.08e-11	0.323083	0.788	0.891	2.16e-08
Sparcl1	2.13e-11	-0.206689	0.273	0.609	4.27e-08
Rpl36	2.9e-11	0.323928	0.773	0.875	5.8e-08
Phldb1	2.95e-11	0.107879	0.356	0.547	5.9e-08
Ntm	6.56e-11	0.137926	0.579	0.773	1.31e-07
Lars2	6.62e-11	0.200512	0.536	0.719	1.32e-07
Rpl11	7.47e-11	0.452636	0.906	0.914	1.49e-07
Plp1	1.31e-10	-0.330102	0.155	0.477	2.63e-07
Vgll3	2.44e-10	-0.118333	0.475	0.75	4.88e-07
S100b	3.98e-10	-0.102501	0.083	0.336	7.97e-07
Rpl24	4.88e-10	0.343592	0.802	0.867	9.77e-07
Rpl18a	5.73e-10	0.359896	0.813	0.867	1.15e-06
Rpl37a	6.68e-10	0.378708	0.871	0.938	1.34e-06
Atp2b1	1.16e-09	-0.215876	0.568	0.859	2.31e-06
mt-Nd4l	1.3e-09	0.221041	0.748	0.875	2.6e-06
Grk3	2.65e-09	0.146461	0.507	0.656	5.31e-06
Gpx3	3.25e-09	0.214214	0.669	0.781	6.49e-06
Mobp	3.66e-09	-0.192865	0.086	0.336	7.33e-06
Rps12	3.71e-09	0.291364	0.781	0.875	7.41e-06
Auts2	3.8e-09	-0.121236	0.241	0.516	7.6e-06
Nfasc	4.33e-09	-0.145269	0.385	0.672	8.67e-06
Nr4a2	4.47e-09	0.142598	0.331	0.5	8.93e-06
Rps24	5.4e-09	0.469231	0.95	0.953	1.08e-05
Rps29	9.64e-09	0.225151	0.863	0.969	1.93e-05
Rpl34	1.2e-08	-0.110209	0.709	0.93	2.39e-05
Rplp1	1.19e-08	0.3352	0.932	0.984	2.39e-05
Pcdh7	1.25e-08	-0.142258	0.612	0.867	2.5e-05
Bin1	2e-08	0.140899	0.511	0.664	3.99e-05
Scg2	2.31e-08	0.170593	0.892	0.992	4.62e-05
Srrm2	2.94e-08	-0.173764	0.842	1	5.89e-05
mt-Nd3	4.35e-08	0.161161	0.644	0.789	8.7e-05
Mbp	4.88e-08	-0.136671	0.227	0.492	9.75e-05
Aplp1	1.27e-07	-0.11798	0.629	0.867	0.000253292
Tpt1	1.33e-07	0.171368	0.709	0.828	0.000266332
Rpl32	2.25e-07	0.184284	0.763	0.859	0.000449297
Chpt1	2.77e-07	-0.111054	0.392	0.633	0.000553794
Rps28	2.94e-07	0.149722	0.701	0.828	0.000588827
Pcdh11x	3.89e-07	0.124859	0.615	0.75	0.000777471
Pou2f2	4.84e-07	-0.228785	0.342	0.609	0.000968505
Ncald	6.01e-07	-0.123821	0.338	0.578	0.00120121
2310022B05Rik	6.96e-07	-0.133669	0.061	0.25	0.00139195
Rps14	7.36e-07	0.262301	0.766	0.844	0.00147259
Tubb4a	1.32e-06	0.133801	0.399	0.516	0.0026486
Pclo	1.5e-06	-0.284679	0.64	0.875	0.00299606
Ntrk2	1.55e-06	-0.10304	0.583	0.805	0.00310462
Ctsd	2.73e-06	0.207468	0.529	0.594	0.00545011
Pcdh17	2.74e-06	0.20267	0.665	0.766	0.00547387
Adgrl2	2.8e-06	0.115718	0.237	0.367	0.00559735
Zbtb20	3.16e-06	-0.113229	0.723	0.914	0.00632118
Rpl37	3.96e-06	0.123453	0.896	0.992	0.00792626
Ppp3ca	4.14e-06	0.147025	0.727	0.836	0.00827789
Ptn	5.03e-06	-0.120968	0.147	0.352	0.0100584
Ckb	8.91e-06	0.10676	0.759	0.875	0.0178152
Rpl26	9.4e-06	0.127848	0.73	0.844	0.0187931
Chgb	1.5e-05	0.11684	0.568	0.688	0.0300215
Zfhx3	1.96e-05	-0.240405	0.586	0.812	0.0392583
Rps8	2.39e-05	0.239368	0.95	0.992	0.0478083
Pfdn5	2.42e-05	0.197488	0.658	0.727	0.0483524

## Sheet: Cluster 5 - Ghrh.Gal
	p_val	avg_log2FC	pct.1	pct.2	p_val_adj
Slc25a18	1.14e-24	-0.102425	0.155	0.756	2.28e-21
Nell1	9.21e-24	-0.137512	0.146	0.744	1.84e-20
Ncdn	3.35e-21	-0.158159	0.356	0.866	6.7e-18
Lypd1	1.55e-17	-0.117057	0.326	0.854	3.1e-14
Cadm2	3.98e-16	-0.101283	0.245	0.72	7.95e-13
Elavl2	6.42e-14	-0.175884	0.425	0.854	1.28e-10
Serpina3n	9.71e-13	0.237595	0.549	0.89	1.94e-09
Phlpp1	8.96e-12	-0.129413	0.283	0.732	1.79e-08
Dlx6os1	7.24e-11	-0.133138	0.588	0.951	1.45e-07
Npy	9.33e-10	-0.165097	0.584	0.317	1.87e-06
Ntsr2	9.47e-10	-0.118885	0.116	0.439	1.89e-06
Cd24a	1.53e-09	-0.103988	0.373	0.22	3.06e-06
Thy1	3.42e-09	-0.139708	0.309	0.671	6.83e-06
Mlc1	3.94e-09	-0.101357	0.326	0.72	7.87e-06
Fam46a	8.59e-09	-0.19242	0.455	0.829	1.72e-05
Gap43	1.78e-08	0.252882	0.639	0.793	3.56e-05
Ddhd1	1.85e-08	-0.165694	0.425	0.793	3.7e-05
Unc5b	5.53e-08	-0.11015	0.661	0.488	0.000110576
Sema5a	8.14e-08	-0.175675	0.24	0.573	0.000162742
Plp1	9.35e-08	-0.160598	0.24	0.573	0.000186975
Marcks	1.05e-07	0.11723	0.536	0.756	0.000209089
Pip4k2a	1.12e-07	-0.20341	0.107	0.402	0.000224237
Tmod1	2.98e-07	-0.134838	0.635	0.927	0.000595129
Agrp	6.61e-07	-0.20902	0.571	0.878	0.00132114
Trib1	8.89e-07	-0.11192	0.511	0.829	0.00177724
Ndrg2	8.98e-07	0.103912	0.536	0.744	0.00179605
Lamp5	4.1e-06	-0.133989	0.631	0.902	0.00820124
Slc24a2	4.34e-06	-0.150998	0.609	0.524	0.00868575
Calcr	5.17e-06	-0.110009	0.506	0.341	0.0103316
Rnf128	5.23e-06	-0.145941	0.549	0.841	0.0104615
Itpr2	5.53e-06	-0.142393	0.232	0.524	0.0110556
Sparc	1.02e-05	-0.144087	0.494	0.768	0.0204925
Cacng4	1.83e-05	-0.110404	0.635	0.561	0.0365707
Atp1a2	1.96e-05	-0.316419	0.592	0.634	0.039197
Chat	2.26e-05	-0.134219	0.592	0.854	0.0451248

## Sheet: Cluster 6 - Carbp1.Vgll3
	p_val	avg_log2FC	pct.1	pct.2	p_val_adj
Pld2	1.65e-62	-0.111572	0.045	0.912	3.29e-59
Vegfa	8.42e-60	-0.106785	0.112	0.947	1.68e-56
Brinp3	5.31e-51	-0.10728	0.197	0.947	1.06e-47
Ddc	1.44e-50	-0.13506	0.157	0.92	2.88e-47
Ptprk	6.84e-46	-0.101072	0.157	0.885	1.37e-42
S100a10	1.61e-45	-0.114058	0.281	0.965	3.22e-42
Ar	3.89e-45	-0.122083	0.174	0.894	7.78e-42
Esr1	1.9e-43	-0.140738	0.034	0.761	3.8e-40
Erbin	5.28e-43	-0.105376	0.118	0.832	1.06e-39
Arhgap23	6.69e-42	-0.142805	0.146	0.85	1.34e-38
Chl1	3.57e-41	-0.147126	0.157	0.858	7.13e-38
Pla2g7	1.63e-40	-0.14522	0.067	0.761	3.25e-37
Serpini1	3.61e-40	-0.123375	0.287	0.938	7.22e-37
Ptgds	1.75e-39	0.282411	0.185	0.823	3.49e-36
Hpcal1	2.1e-36	-0.197257	0.152	0.823	4.2e-33
Sst	7.73e-35	-0.188761	0.135	0.77	1.55e-31
Acsl3	3.94e-32	-0.168041	0.258	0.867	7.88e-29
Ncdn	1.3e-31	-0.198111	0.292	0.894	2.6e-28
Pde4b	1.1e-29	-0.143434	0.124	0.717	2.21e-26
Prdx6	2.05e-29	-0.108905	0.287	0.858	4.1e-26
Spock1	5.17e-29	-0.107656	0.371	0.912	1.03e-25
Slc4a4	3.18e-28	-0.142012	0.208	0.779	6.37e-25
Vsnl1	4.82e-28	-0.139746	0.365	0.903	9.64e-25
Rbms3	3.83e-27	-0.137214	0.191	0.752	7.66e-24
Prlr	1.19e-26	-0.17909	0.253	0.814	2.38e-23
2310022B05Rik	4.81e-24	-0.114052	0.101	0.619	9.63e-21
Rrbp1	5.49e-24	-0.121518	0.236	0.761	1.1e-20
Elavl2	8.05e-24	-0.122606	0.287	0.796	1.61e-20
Grin3a	1.09e-23	-0.133688	0.096	0.602	2.17e-20
Gm45159	4.83e-23	-0.162768	0.208	0.726	9.66e-20
Cdc37l1	9.82e-23	-0.380168	0.371	0.912	1.96e-19
Scn9a	1.29e-22	-0.239495	0.399	0.903	2.58e-19
Bc1	1.77e-22	-0.10158	0.292	0.779	3.54e-19
Cbln2	3.25e-21	-0.130911	0.022	0.46	6.5e-18
Alcam	7.27e-21	-0.17654	0.522	0.956	1.45e-17
Bin1	8.57e-21	-0.134698	0.466	0.912	1.71e-17
Cplx2	1.13e-20	-0.167495	0.382	0.858	2.27e-17
Slc32a1	2.03e-20	-0.102245	0.483	0.912	4.06e-17
Rpl18a	5.72e-20	0.364172	0.635	0.867	1.14e-16
Fat3	1.64e-19	-0.198341	0.045	0.487	3.29e-16
Aldoc	2.88e-19	-0.192128	0.438	0.894	5.75e-16
Fut9	2.51e-18	-0.113541	0.185	0.628	5.01e-15
Gabrg1	1.85e-17	-0.142329	0.607	0.973	3.7e-14
Nell1	1.86e-17	-0.114308	0.169	0.593	3.72e-14
Gap43	2.79e-16	0.188486	0.607	0.885	5.59e-13
mt-Atp8	2.5e-15	0.120755	0.264	0.602	5e-12
Apoe	3.35e-15	0.282883	0.556	0.823	6.71e-12
Dmd	8.27e-15	0.114273	0.41	0.708	1.65e-11
Tubb2a	5.64e-14	0.392921	0.792	0.903	1.13e-10
Tbx3	8.53e-14	-0.195012	0.438	0.832	1.71e-10
Gabrq	1.32e-13	-0.21517	0.32	0.726	2.64e-10
Sparc	6.05e-13	0.13016	0.522	0.823	1.21e-09
Cyp26b1	1.02e-12	-0.147184	0.169	0.531	2.04e-09
Itih3	1.21e-12	-0.104137	0.169	0.513	2.41e-09
Nos1	1.42e-12	-0.100589	0.101	0.442	2.83e-09
Chpt1	4.1e-12	-0.106679	0.169	0.504	8.2e-09
Mt2	8.76e-12	-0.16049	0.163	0.522	1.75e-08
Marcks	1.1e-11	0.143996	0.579	0.805	2.2e-08
Elmo1	1.42e-11	-0.136919	0.09	0.407	2.83e-08
Sulf2	2.22e-11	-0.135219	0.056	0.363	4.43e-08
Rps20	2.75e-11	0.169047	0.669	0.867	5.5e-08
Pbxip1	4.47e-11	-0.135493	0.213	0.558	8.93e-08
Mt1	6.89e-11	-0.124568	0.292	0.628	1.38e-07
Ddhd1	1.3e-10	-0.117442	0.18	0.504	2.59e-07
Msi2	1.36e-10	-0.130585	0.511	0.832	2.72e-07
Rps3a1	1.82e-10	-0.171143	0.697	0.965	3.64e-07
mt-Nd3	2.1e-10	-0.117617	0.567	0.885	4.21e-07
Utrn	3.64e-10	-0.104751	0.253	0.566	7.28e-07
App	5.91e-10	0.317139	0.837	0.965	1.18e-06
Cspg5	6.23e-10	-0.132341	0.404	0.726	1.25e-06
Ap1s2	1.15e-09	-0.171275	0.112	0.416	2.3e-06
Stmn1	1.58e-09	0.114474	0.567	0.788	3.17e-06
Pitpnc1	1.7e-09	-0.109121	0.169	0.469	3.39e-06
mt-Nd5	1.84e-09	0.275125	0.82	0.938	3.68e-06
Rpl17	2.32e-09	0.206187	0.534	0.717	4.65e-06
Jun	3.3e-09	-0.127917	0.135	0.434	6.6e-06
Fth1	3.9e-09	0.289855	0.803	0.92	7.8e-06
Nrgn	5.91e-09	-0.109069	0.438	0.735	1.18e-05
Gpc3	7.2e-09	-0.10434	0.225	0.513	1.44e-05
Pde1a	4.31e-08	-0.159715	0.326	0.628	8.63e-05
Soat1	5.84e-08	0.109212	0.135	0.301	0.000116882
Syt4	6.16e-08	0.20327	0.579	0.743	0.000123284
Sparcl1	9.13e-08	-0.242296	0.382	0.699	0.000182599
AC149090.1	1.31e-07	-0.24899	0.826	1	0.000262215
Slc17a6	2.45e-07	-0.192238	0.096	0.354	0.000490687
Otp	4.26e-07	0.100523	0.112	0.283	0.000851687
Epn2	5.45e-07	-0.107764	0.174	0.434	0.00109093
Col4a4	7.86e-07	0.118234	0.197	0.372	0.00157207
Zbtb20	1.46e-06	-0.138843	0.826	0.991	0.0029197
Gria3	1.46e-06	0.12695	0.326	0.504	0.00292759
Ppp3ca	1.47e-06	-0.129052	0.618	0.858	0.00293396
Scd2	1.56e-06	0.129785	0.685	0.832	0.00312813
Lsamp	2.21e-06	-0.135258	0.472	0.735	0.00442239
Gad2	2.75e-06	0.142695	0.466	0.628	0.00550467
Slc6a1	4.14e-06	0.165153	0.41	0.522	0.00827297
Tmem130	5.37e-06	-0.160045	0.68	0.912	0.0107413
Rgs2	6.24e-06	0.161175	0.202	0.363	0.0124701
Rpl36	6.25e-06	0.160332	0.685	0.796	0.0124957
Zwint	7.69e-06	0.125784	0.871	0.973	0.0153761
Ntng1	9.42e-06	-0.131414	0.14	0.363	0.0188491
Npy	1.04e-05	-0.128643	0.169	0.389	0.0207997
mt-Nd4l	1.08e-05	0.249048	0.792	0.867	0.0215428
Aatk	1.35e-05	0.168576	0.478	0.566	0.0269782
Mobp	1.35e-05	-0.108174	0.073	0.274	0.0269975
Ndn	1.65e-05	0.325846	0.865	0.929	0.0330297
Atp1a2	1.69e-05	0.121265	0.416	0.602	0.033752
Cadm2	1.81e-05	0.106452	0.348	0.496	0.0361111
Pcp4	1.97e-05	-0.136622	0.449	0.69	0.0394455
Abca2	2e-05	0.156361	0.393	0.487	0.039925

## Sheet: Cluster 7 - Cartpt.Trh
	p_val	avg_log2FC	pct.1	pct.2	p_val_adj
Npy1r	1.71e-14	-0.2131	0.505	0.279	3.42e-11
Thy1	1.94e-13	0.148295	0.391	0.744	3.88e-10
Abca1	1.41e-12	-0.27864	0.35	0.907	2.83e-09
Bc1	2.12e-10	-0.175632	0.291	0.744	4.24e-07
Lmo7	4.36e-10	-0.126391	0.273	0.791	8.72e-07
Rab3b	1.46e-09	-0.124141	0.345	0.837	2.91e-06
Tmeff2	3.22e-09	-0.187584	0.332	0.837	6.44e-06
Vgf	2.35e-08	0.356088	0.473	0.744	4.7e-05
Kcnk2	3.39e-08	-0.170136	0.514	0.372	6.78e-05
Ctss	8.89e-08	-0.111411	0.436	0.209	0.000177709
H2-K1	3.29e-07	-0.126746	0.636	0.977	0.000658721
Foxp2	5.96e-07	-0.135296	0.5	0.907	0.00119191
C1ql3	6.56e-07	-0.139114	0.273	0.186	0.00131182
Hspa2	9.35e-07	-0.16974	0.505	0.907	0.00187053
Maf	9.68e-07	-0.260341	0.527	0.488	0.00193587
Sfrp1	1.2e-06	-0.218666	0.523	0.419	0.00240792
Tmem35a	1.22e-06	-0.145804	0.45	0.279	0.00243637
Tbx3	1.23e-06	-0.125352	0.609	0.349	0.00246871
Epha4	1.72e-06	-0.104194	0.327	0.744	0.00343122
Elavl2	1.93e-06	-0.146822	0.577	0.93	0.00386805
Gap43	3.58e-06	0.189593	0.745	0.93	0.00715374
Mcam	5.27e-06	-0.239754	0.614	0.953	0.0105472
Ebf1	6.75e-06	0.169989	0.205	0.279	0.0134941
Snca	7.33e-06	0.131403	0.268	0.512	0.0146684
Cplx2	7.85e-06	-0.19724	0.45	0.837	0.0156975
Tst	9.75e-06	-0.1091	0.445	0.302	0.0194959
Opcml	1.3e-05	-0.258085	0.605	0.512	0.0259983
Zcchc24	1.37e-05	-0.109096	0.459	0.302	0.0273784
Erbb4	1.91e-05	-0.124298	0.336	0.698	0.0381669

## Sheet: Cluster 8 - Pomc
	p_val	avg_log2FC	pct.1	pct.2	p_val_adj
Cd44	9.32e-33	-0.110081	0.284	0.99	1.86e-29
Cd24a	1.32e-32	-0.10173	0.326	1	2.64e-29
Snca	9.2e-32	-0.112386	0.147	0.917	1.84e-28
Igf1r	4.91e-28	-0.102896	0.232	0.917	9.82e-25
Pcdh15	3.04e-27	0.16899	0.253	0.823	6.08e-24
Ccnd1	6.88e-27	0.119442	0.189	0.792	1.38e-23
S100a10	6.89e-24	-0.12619	0.347	0.948	1.38e-20
Thy1	2.21e-23	-0.161687	0.179	0.833	4.42e-20
Cd38	8.32e-23	-0.105065	0.137	0.812	1.66e-19
Auts2	6.16e-19	-0.106043	0.242	0.823	1.23e-15
Dpp10	5.63e-18	-0.138215	0.063	0.615	1.13e-14
Nefm	6.98e-18	-0.158744	0.274	0.844	1.4e-14
Gda	2.73e-17	-0.102238	0.305	0.833	5.45e-14
Ptprt	1.12e-16	-0.13293	0.463	0.948	2.24e-13
Atp2b4	4.87e-16	-0.178747	0.189	0.75	9.74e-13
Chn2	1.45e-15	-0.114903	0.084	0.615	2.9e-12
Jun	4.96e-15	-0.166809	0.221	0.76	9.92e-12
Atp1b2	8.97e-15	-0.115235	0.063	0.531	1.79e-11
Aatk	6.32e-14	-0.139515	0.442	0.896	1.26e-10
Prdx6	1.89e-13	-0.12128	0.253	0.75	3.78e-10
Edil3	7.61e-13	-0.15826	0.432	0.885	1.52e-09
Gfra1	9.95e-13	-0.125769	0.389	0.844	1.99e-09
Npnt	1.08e-12	0.101255	0.147	0.531	2.15e-09
Grm5	1.23e-12	-0.169888	0.316	0.792	2.46e-09
Gal	4.58e-12	0.143088	0.232	0.635	9.17e-09
C130073E24Rik	8.53e-12	-0.147322	0.432	0.865	1.71e-08
Bc1	1.79e-11	0.102929	0.337	0.656	3.59e-08
Vsnl1	3.38e-11	-0.239717	0.137	0.583	6.76e-08
Cadm1	8.9e-11	-0.244344	0.474	0.885	1.78e-07
Chl1	5.58e-10	-0.164053	0.505	0.885	1.12e-06
Fut9	1.65e-09	0.132252	0.4	0.698	3.3e-06
Tcf4	2.06e-09	-0.157145	0.632	0.958	4.11e-06
Cited1	2.32e-09	-0.113669	0.747	1	4.63e-06
Gpr83	4.41e-09	-0.100334	0.095	0.448	8.82e-06
Arhgap6	4.8e-09	0.100408	0.442	0.74	9.59e-06
mt-Nd3	5.83e-09	0.382626	0.611	0.76	1.17e-05
Cd81	6.39e-09	-0.112827	0.642	0.948	1.28e-05
Dpy19l1	9.28e-09	0.100651	0.2	0.458	1.86e-05
Dock10	9.37e-09	-0.104762	0.137	0.51	1.87e-05
Epn2	1.2e-08	-0.127427	0.232	0.625	2.39e-05
Serpina3n	1.3e-08	0.107075	0.8	1	2.59e-05
AC149090.1	1.46e-08	0.101838	0.526	0.812	2.92e-05
Msi2	1.72e-08	-0.146485	0.663	0.958	3.43e-05
Rpl26	1.98e-08	0.330728	0.737	0.875	3.97e-05
Qk	8.36e-08	-0.191362	0.189	0.552	0.0001671
Npy1r	1.74e-07	-0.212107	0.653	0.948	0.000348899
Car10	2.69e-07	-0.147874	0.411	0.76	0.000538359
Tubb3	3e-07	-0.316294	0.716	0.979	0.000600951
Nnat	3.77e-07	0.314573	0.716	0.875	0.000753624
Zfhx3	5.15e-07	-0.169406	0.411	0.76	0.00103035
Gap43	9.85e-07	0.190905	0.789	0.938	0.00197005
Pcdh17	1.26e-06	0.248218	0.758	0.896	0.00251884
Rps8	1.61e-06	0.321231	0.916	0.979	0.0032232
Rmst	1.73e-06	0.166036	0.526	0.719	0.00346063
Tenm1	2.3e-06	-0.153001	0.642	0.917	0.00459671
Cd63	3.54e-06	0.178086	0.505	0.677	0.00707457
Clu	4.56e-06	0.22179	0.558	0.719	0.00911493
Lmo3	4.68e-06	0.133757	0.189	0.406	0.00935516
Nrgn	5.78e-06	-0.132094	0.168	0.479	0.0115533
Rpl17	7.29e-06	0.218121	0.674	0.812	0.0145797
Nrp2	8.11e-06	0.114427	0.221	0.427	0.0162143
Rps3a1	8.36e-06	0.290553	0.779	0.875	0.016712
Camk2d	1.03e-05	-0.129353	0.495	0.781	0.020595
Ogt	1.28e-05	0.105656	0.547	0.74	0.0256185
Basp1	1.8e-05	0.157944	0.653	0.823	0.0360275

## Sheet: Cluster 9 - Agrp.Npy
	p_val	avg_log2FC	pct.1	pct.2	p_val_adj
Qk	2.85e-08	-0.60592	0.101	0.536	5.71e-05
Mobp	1.25e-05	-0.393539	0.038	0.319	0.0249911
Mt1	3.65e-08	-0.376888	0.291	0.725	7.29e-05
Chchd10	6.29e-17	-0.346214	0.278	0.884	1.26e-13
Mbp	5.18e-10	-0.330937	0.203	0.681	1.04e-06
Cadm1	6.05e-12	-0.317035	0.481	0.957	1.21e-08
Id2	8.55e-22	-0.316896	0.063	0.812	1.71e-18
Ptch1	7.86e-15	-0.292742	0.051	0.638	1.57e-11
AC149090.1	3.64e-10	-0.269131	0.557	0.971	7.29e-07
Sparc	2.35e-18	-0.268336	0.291	0.913	4.7e-15
Plpp3	9.25e-06	-0.258507	0.127	0.449	0.0185088
Pdyn	1.33e-16	-0.252174	0.089	0.725	2.67e-13
Dmd	1.68e-07	-0.247761	0.101	0.493	0.000336182
Plcb4	4.86e-12	-0.246177	0.139	0.681	9.73e-09
Slc24a2	1.09e-17	-0.234172	0.076	0.739	2.18e-14
Gstm1	5.78e-10	-0.232865	0.127	0.594	1.16e-06
mt-Atp8	6.2e-11	-0.232169	0.228	0.739	1.24e-07
Rnf128	5.28e-21	-0.231048	0.076	0.812	1.06e-17
Chpt1	5.64e-09	-0.229012	0.127	0.58	1.13e-05
Timp3	1.39e-18	-0.226929	0.139	0.797	2.78e-15
Gabrq	6.97e-17	-0.221744	0.152	0.797	1.39e-13
Vsnl1	1.06e-17	-0.219362	0.19	0.797	2.12e-14
Rps12	7.01e-06	-0.217447	0.696	0.971	0.0140189
Agt	3.86e-24	-0.214636	0.051	0.783	7.72e-21
Cadm2	1.79e-09	-0.214009	0.063	0.493	3.58e-06
Cited1	7.2e-11	-0.210751	0.418	0.884	1.44e-07
Auts2	6.76e-12	-0.203688	0.063	0.565	1.35e-08
Lars2	4.6e-13	-0.197151	0.418	0.913	9.2e-10
Zfhx4	1.04e-09	-0.191861	0.076	0.522	2.08e-06
B3gat2	2.07e-25	-0.190641	0.051	0.826	4.15e-22
Glul	1.14e-15	-0.188169	0.165	0.725	2.29e-12
S100a1	2.19e-06	-0.182431	0.025	0.319	0.00438482
Gabre	6.06e-06	-0.178077	0.19	0.536	0.012113
Pde4b	5.02e-21	-0.17688	0.076	0.797	1e-17
Irs4	1.41e-08	-0.176137	0.43	0.826	2.83e-05
Itgb8	3.53e-15	-0.170505	0.051	0.638	7.06e-12
Gm2a	2.37e-06	-0.167912	0.038	0.348	0.00474402
Tril	2.97e-06	-0.167851	0.013	0.275	0.00594375
Adgrg1	1.54e-10	-0.163876	0.063	0.507	3.08e-07
Mmd2	1.47e-09	-0.163077	0.051	0.464	2.93e-06
Otp	6.69e-10	-0.161516	0.405	0.841	1.34e-06
B2m	3.21e-07	-0.158593	0.127	0.507	0.000642082
Rgs5	4.21e-22	-0.155703	0.025	0.754	8.42e-19
Soat1	6.91e-22	-0.154532	0.063	0.812	1.38e-18
Epb41l2	8.97e-07	-0.153364	0.051	0.391	0.0017934
Rfx4	8.4e-09	-0.151591	0.038	0.435	1.68e-05
Bcl2	8.03e-08	-0.145615	0.038	0.391	0.00016057
Map7	7.04e-14	-0.145353	0.076	0.623	1.41e-10
S1pr1	3.26e-25	-0.143339	0.038	0.812	6.53e-22
Cplx1	4.04e-07	-0.139849	0.038	0.377	0.000808767
Atp1a2	7.07e-21	-0.138669	0.228	0.899	1.41e-17
Kcnk9	3.11e-08	-0.137399	0.304	0.71	6.22e-05
Myo6	4.37e-09	-0.136378	0.063	0.464	8.73e-06
Npy2r	4.71e-13	-0.135753	0.165	0.696	9.42e-10
C130073E24Rik	7.57e-09	-0.135296	0.038	0.435	1.51e-05
2022-09-04	1.89e-07	-0.129274	0.038	0.377	0.000377209
Necab1	4.6e-19	-0.128441	0.051	0.739	9.21e-16
Mpp6	1.56e-17	-0.12653	0.063	0.71	3.13e-14
Ccnd1	2.11e-17	-0.126247	0.063	0.696	4.23e-14
Cyp2j6	7.79e-07	-0.126238	0.025	0.333	0.00155841
Wscd1	2.54e-07	-0.124672	0.038	0.377	0.000507643
Fam107a	1.31e-11	-0.123768	0.139	0.638	2.63e-08
Bcl11b	1.23e-26	-0.123001	0.076	0.899	2.45e-23
Id4	8e-06	-0.118914	0.127	0.464	0.0160054
Aqp4	3.9e-06	-0.118912	0.051	0.362	0.00780174
Gna12	3.46e-20	-0.113674	0.076	0.768	6.93e-17
Camk2n1	1.07e-06	-0.113251	0.304	0.652	0.00214045
Ddo	1.59e-16	-0.112093	0.051	0.681	3.18e-13
Ctss	4.17e-11	-0.111776	0.051	0.536	8.34e-08
Tgfbi	1.19e-27	-0.109432	0.089	0.913	2.38e-24
Erbin	1.11e-06	-0.109343	0.051	0.377	0.0022298
Arpp21	2.64e-33	-0.109074	0.089	0.971	5.27e-30
Synpr	9.84e-21	-0.109045	0.051	0.696	1.97e-17
Slc7a10	9.98e-14	-0.108034	0.063	0.623	2e-10
Itgav	6.17e-14	-0.105272	0.038	0.58	1.23e-10
Gabra1	1.23e-07	-0.105217	0.089	0.42	0.000245936
Sparcl1	1.83e-13	-0.103524	0.278	0.754	3.67e-10
Oxt	8.27e-06	-0.102184	0.013	0.261	0.016541
Ccp110	5.94e-17	-0.101523	0.076	0.71	1.19e-13
Ttyh1	3.69e-11	-0.100466	0.139	0.609	7.38e-08
Entpd2	5.32e-20	-0.100401	0.025	0.71	1.06e-16
Rell1	3.42e-10	-0.100109	0.051	0.507	6.84e-07
Gpr88	1.29e-08	0.103459	0.063	0.377	2.57e-05
Ppp2r5a	5.39e-12	0.104171	0.127	0.551	1.08e-08
Wif1	6.96e-20	0.105451	0.076	0.681	1.39e-16
Fzd5	1.78e-09	0.106315	0.089	0.42	3.57e-06
Cartpt	1.17e-14	0.10742	0.278	0.797	2.33e-11
Resp18	3.28e-12	0.109224	0.532	0.928	6.55e-09
Plagl1	1.1e-14	0.109258	0.316	0.797	2.19e-11
Oprk1	8.94e-13	0.111758	0.063	0.435	1.79e-09
Gpr101	1.22e-06	0.114041	0.127	0.362	0.00244977
Frzb	1.02e-09	0.115282	0.076	0.391	2.04e-06
Tsc22d3	1.72e-15	0.116649	0.063	0.522	3.44e-12
Thy1	1.76e-07	0.120118	0.177	0.435	0.00035234
Tmem176b	3.05e-09	0.120935	0.152	0.435	6.09e-06
Ppp1cc	5.95e-40	0.125733	0.063	0.754	1.19e-36
Elmo1	2.25e-18	0.126734	0.19	0.754	4.49e-15
Rorb	1.68e-06	0.129638	0.165	0.42	0.00335816
Slc7a5	7.62e-16	0.130151	0.063	0.478	1.52e-12
Kcnq3	2.07e-23	0.145462	0.152	0.783	4.14e-20
Zdbf2	2.6e-06	0.146551	0.278	0.551	0.00520517
Nkain4	3.11e-10	0.147957	0.063	0.348	6.22e-07
Tubb4a	5.66e-07	0.155693	0.304	0.58	0.00113135
Rbms3	7.46e-06	0.158562	0.266	0.507	0.0149114
Gap43	6.62e-15	0.171361	0.595	0.971	1.32e-11
Cspg5	2.42e-05	0.193	0.266	0.435	0.048335
Snca	8.09e-17	0.202245	0.177	0.609	1.62e-13
Ndrg2	3.53e-11	0.209011	0.354	0.696	7.06e-08
Ntm	1.41e-12	0.210616	0.203	0.609	2.82e-09
Agrp	9.06e-06	0.226234	0.785	0.971	0.0181231
Acvr1c	2.23e-19	0.231274	0.278	0.797	4.45e-16
Vgf	2.58e-13	0.233473	0.101	0.449	5.15e-10
Ptprn	1.84e-06	0.251348	0.646	0.841	0.00367262
Bsg	2.82e-09	0.256434	0.544	0.826	5.65e-06
Rps28	3.98e-13	0.270108	0.646	0.942	7.96e-10
Ptma	7.03e-13	0.296587	0.304	0.638	1.41e-09
Pomc	1.73e-05	0.301563	0.228	0.551	0.034523
Chgb	1.71e-07	0.376807	0.342	0.464	0.000341253
Rpl32	4.24e-06	0.410355	0.823	0.928	0.00848479
Asb4	5.97e-07	0.419636	0.304	0.435	0.00119315
Tuba1a	1.01e-05	0.463872	0.848	0.899	0.0202185
Serpina3n	6.28e-17	0.47582	0.43	0.855	1.26e-13

[truncated: 2 more sheets: Cluster 10 - Gal.Gpr50, Cluster 11 - Slc6a3.Th]
