# Supplementary material for: Cell-specific transcriptome changes in the hypothalamic arcuate nucleus in a mouse deoxycorticosterone acetate-salt model of hypertension
Source: Front Cell Neurosci. 2023 May 24;17:1207350. doi: 10.3389/fncel.2023.1207350 (PMC10244568; doi:10.3389/fncel.2023.1207350)
Supplement: Supplementary file 11 [file Data_Sheet_11.XLSX]

## Sheet: ShinyGo 0.75 - Go Bio Process
Table S17 - N_SC0 Agrp.Npy.Sst DOCA DEGs Enrichment Results
Enrichment FDR	nGenes	Pathway Genes	Fold Enrichment	Pathway	URL	Genes
0.000873593	4	38	30.3116	Neurotransmitter uptake	http://amigo.geneontology.org/amigo/term/GO:0001504	Atp1a2 Slc18a2 Slc6a11 Gpm6b
0.00210006	4	49	23.507	Positive regulation of glial cell differentiation	http://amigo.geneontology.org/amigo/term/GO:0045687	Enpp2 Ptn Mag Qk
0.0022008	4	50	23.0368	Positive regulation of nervous system process	http://amigo.geneontology.org/amigo/term/GO:0031646	Cartpt Trf S100b Mag
0.000760385	5	75	19.1974	Positive regulation of gliogenesis	http://amigo.geneontology.org/amigo/term/GO:0014015	Enpp2 Ptn Trf Mag Qk
5.13397e-05	7	115	17.528	Oligodendrocyte differentiation	http://amigo.geneontology.org/amigo/term/GO:0048709	Cnp Enpp2 Ptn Plp1 Mobp Mag Qk
1.8129e-06	9	150	17.2776	Myelination	http://amigo.geneontology.org/amigo/term/GO:0042552	Mal Ptn Plp1 Mobp Trf S100b Mag Gjc3 Qk
1.8129e-06	9	153	16.9389	Ensheathment of neurons	http://amigo.geneontology.org/amigo/term/GO:0007272	Mal Ptn Plp1 Mobp Trf S100b Mag Gjc3 Qk
1.8129e-06	9	153	16.9389	Axon ensheathment	http://amigo.geneontology.org/amigo/term/GO:0008366	Mal Ptn Plp1 Mobp Trf S100b Mag Gjc3 Qk
0.000777721	7	203	9.92967	Regulation of blood pressure	http://amigo.geneontology.org/amigo/term/GO:0008217	Atp1a2 Pomc Cartpt Ednrb Tac2 Pmch Camk2n1
0.000414556	8	244	9.44133	Glial cell differentiation	http://amigo.geneontology.org/amigo/term/GO:0010001	Cnp Enpp2 Ptn Plp1 Mobp S100b Mag Qk
0.000664642	8	276	8.34668	Organic hydroxy compound transport	http://amigo.geneontology.org/amigo/term/GO:0015850	Abca1 Pomc Cartpt Gal Slc18a2 Soat1 Gpm6b Pcp4
0.000414556	9	335	7.73625	Gliogenesis	http://amigo.geneontology.org/amigo/term/GO:0042063	Cnp Enpp2 Ptn Plp1 Mobp Trf S100b Mag Qk
0.000797485	11	604	5.24431	Regulation of system process	http://amigo.geneontology.org/amigo/term/GO:0044057	Atp1a2 Utrn Pomc Cartpt Ednrb Gal Rgs2 Trf S100b Pmch Mag
0.000243311	13	716	5.22833	Behavior	http://amigo.geneontology.org/amigo/term/GO:0007610	Ccnd2 Cnp Atp1a2 Cartpt Gal Slc18a2 Tmod1 Ptn S100b Pmch Six3 Grm5 Kcnip3
0.000873593	14	1014	3.97579	Central nervous system development	http://amigo.geneontology.org/amigo/term/GO:0007417	Cnp Atp1a2 Tbx3 Enpp2 Rgs2 Ptn Slc6a11 Plp1 Mobp Acsl3 S100b Mag Six3 Qk
0.000518652	16	1222	3.77035	Chemical homeostasis	http://amigo.geneontology.org/amigo/term/GO:0048878	Atp1a2 Abca1 Pomc Cartpt Ednrb Aqp4 Slc18a2 Soat1 Mt2 Thy1 Trf S100b Pmch Scd1 Camk2n1 Grm5
3.19469e-05	22	1765	3.58931	Neurogenesis	http://amigo.geneontology.org/amigo/term/GO:0022008	Cnp Ednrb Enpp2 Ncam2 Bsg Rgs2 Itga6 Ptn Gpm6b Plp1 Thy1 Mobp Trf Acsl3 S100b Mag Cep85l Six3 Grm5 Fut9 Qk Pcp4
2.85061e-07	30	2409	3.58606	Nervous system development	http://amigo.geneontology.org/amigo/term/GO:0007399	Cnp Atp1a2 Tbx3 Ednrb Enpp2 Ncam2 Bsg Gal Rgs2 Itga6 Mal Nfia Ptn Slc6a11 Gpm6b Plp1 Thy1 Mobp Trf Acsl3 S100b Mag Cep85l Six3 Fzd5 Grm5 Fut9 Gjc3 Qk Pcp4
0.000136995	20	1627	3.53977	Generation of neurons	http://amigo.geneontology.org/amigo/term/GO:0048699	Cnp Ednrb Enpp2 Ncam2 Bsg Rgs2 Itga6 Ptn Gpm6b Plp1 Thy1 Trf Acsl3 Mag Cep85l Six3 Grm5 Fut9 Qk Pcp4
0.000486812	18	1517	3.4168	Positive regulation of multicellular organismal process	http://amigo.geneontology.org/amigo/term/GO:0051240	Abca1 Cartpt Ednrb Enpp2 Bsg Gal Rgs2 Rasgrp1 Ptn Gpm6b Trf S100b Pmch Mag Scd1 Fzd5 Grm5 Qk
0.00105324	17	1496	3.27228	Cell-cell signaling	http://amigo.geneontology.org/amigo/term/GO:0007267	Abca1 Tbx3 Pomc Cartpt Gal Slc18a2 Ptn Thy1 S100b Pmch Six3 Fzd5 Camk2n1 Grm5 Sv2c Gjc3 Pcp4
0.00109705	19	1841	2.97189	Regulation of transport	http://amigo.geneontology.org/amigo/term/GO:0051049	Atp1a2 Abca1 Pomc Cartpt Ednrb Bsg Gal Slc18a2 Rgs2 Gpm6b Plp1 Thy1 Trf Acsl3 Mlc1 Camk2n1 Grm5 Kcnip3 Pcp4
0.000862381	22	2322	2.72831	Cell development	http://amigo.geneontology.org/amigo/term/GO:0048468	Cnp Tbx3 Ednrb Enpp2 Ncam2 Bsg Rgs2 Itga6 Tmod1 Ptn Gpm6b Plp1 Thy1 Mobp Trf Mag Six3 Fzd5 Grm5 Fut9 Qk Pcp4
0.000414556	25	2713	2.65352	Regulation of multicellular organismal process	http://amigo.geneontology.org/amigo/term/GO:0051239	Atp1a2 Abca1 Tbx3 Utrn Pomc Cartpt Ednrb Enpp2 Bsg Aqp4 Gal Rgs2 Rasgrp1 Ptn Gpm6b Thy1 Trf S100b Pmch Mag Scd1 Otud7b Fzd5 Grm5 Qk
0.000664642	25	2821	2.55194	Regulation of localization	http://amigo.geneontology.org/amigo/term/GO:0032879	Atp1a2 Abca1 Pomc Cartpt Ednrb Enpp2 Bsg Gal Slc18a2 Tac2 Rgs2 Itga6 Ptn Gpm6b Plp1 Thy1 Trf Acsl3 Mlc1 Otud7b Camk2n1 Grm5 Fut9 Kcnip3 Pcp4
0.000243311	31	3751	2.37984	Regulation of biological quality	http://amigo.geneontology.org/amigo/term/GO:0065008	Gria3 Cnp Atp1a2 Abca1 Tbx3 Pomc Cartpt Ednrb Bsg Aqp4 Gal Slc18a2 Tac2 Rgs2 Soat1 Tmod1 Sparcl1 Ptn Slc6a11 Gpm6b Mt2 Thy1 Crabp1 Trf S100b Pmch Mag Scd1 Camk2n1 Grm5 Qk
3.19469e-05	38	4822	2.26929	System development	http://amigo.geneontology.org/amigo/term/GO:0048731	Cnp Atp1a2 Rpl10 Tbx3 Cartpt Ednrb Enpp2 Ncam2 Bsg Gal Plce1 Rgs2 Itga6 Rasgrp1 Mal Tmod1 Nfia Ptn Slc6a11 Gpm6b Plp1 Thy1 Mobp Trf Acsl3 S100b Rxfp1 Mag Scd1 Cep85l Six3 Fzd5 Grm5 Scg2 Fut9 Gjc3 Qk Pcp4
0.000414556	33	4348	2.18553	Transport	http://amigo.geneontology.org/amigo/term/GO:0006810	Gria3 Cnp Atp1a2 Abca1 Tbx3 Pomc Cartpt Ednrb Enpp2 Bsg Aqp4 Gal Slc18a2 Rgs2 Soat1 Rasgrp1 Slc6a11 Slc7a10 Gpm6b Plp1 Thy1 Trf Acsl3 Mlc1 Six3 Pitpnc1 Camk2n1 Grm5 Sv2c Gjc3 Qk Kcnip3 Pcp4
0.000389096	34	4504	2.17377	Establishment of localization	http://amigo.geneontology.org/amigo/term/GO:0051234	Gria3 Cnp Atp1a2 Abca1 Tbx3 Pomc Cartpt Ednrb Enpp2 Bsg Aqp4 Gal Slc18a2 Rgs2 Soat1 Rasgrp1 Mal Slc6a11 Slc7a10 Gpm6b Plp1 Thy1 Trf Acsl3 Mlc1 Six3 Pitpnc1 Camk2n1 Grm5 Sv2c Gjc3 Qk Kcnip3 Pcp4
0.00181589	31	4330	2.06161	Cell differentiation	http://amigo.geneontology.org/amigo/term/GO:0030154	Cnp Tbx3 Cartpt Ednrb Enpp2 Ncam2 Bsg Rgs2 Soat1 Itga6 Rasgrp1 Tmod1 Ptn Plekhb1 Gpm6b Plp1 Thy1 Mobp Trf Acsl3 S100b Rxfp1 Mag Scd1 Cep85l Six3 Fzd5 Grm5 Fut9 Qk Pcp4

## Sheet: ShinyGo 0.75 - GO Molec Funct
Enrichment FDR	nGenes	Pathway Genes	Fold Enrichment	Pathway	URL	Genes
0.00166824	3	10	86.3882	Structural constituent of myelin sheath	http://amigo.geneontology.org/amigo/term/GO:0019911	Mal Plp1 Mobp
0.00166824	4	38	30.3116	Neuropeptide receptor binding	http://amigo.geneontology.org/amigo/term/GO:0071855	Pomc Gal Tac2 Pmch
0.0484707	4	132	8.72608	Integrin binding	http://amigo.geneontology.org/amigo/term/GO:0005178	Utrn Itga6 Ptn Thy1
0.0484707	4	132	8.72608	Hormone activity	http://amigo.geneontology.org/amigo/term/GO:0005179	Pomc Cartpt Gal Pmch
0.0406251	6	303	5.70219	G protein-coupled receptor binding	http://amigo.geneontology.org/amigo/term/GO:0001664	Pomc Ednrb Gal Tac2 Pmch Grm5
0.00851547	11	786	4.02998	Lipid binding	http://amigo.geneontology.org/amigo/term/GO:0008289	Atp1a2 Abca1 Soat1 Rasgrp1 Thy1 Crabp1 Mag Arap2 Pitpnc1 Paqr6 Fzd5
0.0484707	9	736	3.52126	Protein kinase binding	http://amigo.geneontology.org/amigo/term/GO:0019901	Ccnd2 Utrn Ptn Thy1 Acsl3 Mag Fzd5 Camk2n1 Grm5
0.00166824	17	1502	3.25921	Signaling receptor binding	http://amigo.geneontology.org/amigo/term/GO:0005102	Abca1 Utrn Pomc Cartpt Ednrb Gal Tac2 Itga6 Ptn Thy1 Trf S100b Pmch Mag Six3 Grm5 Scg2
0.0406251	12	1172	2.9484	Transporter activity	http://amigo.geneontology.org/amigo/term/GO:0005215	Gria3 Atp1a2 Abca1 Aqp4 Slc18a2 Slc6a11 Slc7a10 Pitpnc1 Sv2c Gjc3 mt-Nd3 Kcnip3
0.0492047	11	1089	2.90869	Transmembrane transporter activity	http://amigo.geneontology.org/amigo/term/GO:0022857	Gria3 Atp1a2 Abca1 Aqp4 Slc18a2 Slc6a11 Slc7a10 Sv2c Gjc3 mt-Nd3 Kcnip3
0.0406251	16	1869	2.46515	Molecular function regulator	http://amigo.geneontology.org/amigo/term/GO:0098772	Ccnd2 Timp3 Pomc Cartpt Gal Plce1 Rgs2 Rgs5 Rasgrp1 Ptn Thy1 Pmch Arap2 Camk2n1 Scg2 Kcnip3

## Sheet: ShinyGo 0.75 - Reactome
Enrichment FDR	nGenes	Pathway Genes	Fold Enrichment	Pathway	URL	Genes
0.000296413	4	24	47.9934	Basigin interactions	https://reactome.org/download/current	Bsg Itga6 Slc7a10 Mag
0.0476617	2	19	30.3116	Na+/Cldependent neurotransmitter transporters	https://reactome.org/download/current	Slc18a2 Slc6a11
0.0229227	4	112	10.2843	Post-translational protein phosphorylation	https://reactome.org/download/current	Chgb Sparcl1 Trf Scg2
0.0232609	4	118	9.76137	Regulation of Insulin-like Growth Factor IGF transport and uptake by Insulin-like Growth Factor Binding Proteins IGFBPs	https://reactome.org/download/current	Chgb Sparcl1 Trf Scg2
0.0064602	6	196	8.81512	Peptide ligand-binding receptors	https://reactome.org/download/current	Pomc Ednrb Gal Tac2 Rxfp1 Pmch
0.0064602	6	209	8.26681	G alpha q signalling events	https://reactome.org/download/current	Ednrb Tac2 Rgs2 Rgs5 Pmch Grm5
0.0232609	6	319	5.41619	Class A/1 Rhodopsin-like receptors	https://reactome.org/download/current	Pomc Ednrb Gal Tac2 Rxfp1 Pmch
0.0229227	7	408	4.9405	GPCR ligand binding	https://reactome.org/download/current	Pomc Ednrb Gal Tac2 Rxfp1 Pmch Grm5
0.0183604	9	632	4.1007	Transport of small molecules	https://reactome.org/download/current	Atp1a2 Abca1 Bsg Aqp4 Slc18a2 Soat1 Slc6a11 Slc7a10 Trf

## Sheet: ShinyGo 0.75 - KEGG
Enrichment FDR	nGenes	Pathway Genes	Fold Enrichment	Pathway	URL	Genes
0.00596592	8	372	6.1927	Neuroactive ligand-receptor interaction	http://www.genome.jp/kegg-bin/show_pathway?mmu04080	Gria3 Pomc Ednrb Gal Tac2 Rxfp1 Pmch Grm5
