# Supplementary material for: Cell-specific transcriptome changes in the hypothalamic arcuate nucleus in a mouse deoxycorticosterone acetate-salt model of hypertension
Source: Front Cell Neurosci. 2023 May 24;17:1207350. doi: 10.3389/fncel.2023.1207350 (PMC10244568; doi:10.3389/fncel.2023.1207350)
Supplement: Supplementary file 12 [file Data_Sheet_12.XLSX]

## Sheet: ShinyGo 0.75 - GO Bio Process
Table S15 - N_SC9 vs N_SC2 Enrichment Results
Enrichment FDR	nGenes	Pathway Genes	Fold Enrichment	Pathway	URL	Genes
0.000103233	3	6	125.776	Stress response to copper ion	http://amigo.geneontology.org/amigo/term/GO:1990169	Mt3 Mt2 Mt1
0.000103233	3	6	125.776	Detoxification of copper ion	http://amigo.geneontology.org/amigo/term/GO:0010273	Mt3 Mt2 Mt1
2.10672e-08	6	20	75.4655	Ribosomal small subunit assembly	http://amigo.geneontology.org/amigo/term/GO:0000028	Rps14 Rpsa Rps19 Rps10 Rpl38 Rps28
5.61756e-06	5	25	50.3103	Positive regulation of signal transduction by p53 class mediator	http://amigo.geneontology.org/amigo/term/GO:1901798	Rps20 Rpl37 Rpl11 Rpl26 Rpl23
9.883e-05	4	20	50.3103	Cellular response to copper ion	http://amigo.geneontology.org/amigo/term/GO:0071280	App Mt3 Mt2 Mt1
4.07832e-19	16	101	39.8498	Cytoplasmic translation	http://amigo.geneontology.org/amigo/term/GO:0002181	Rplp1 Rpl19 Rpsa Rps29 Rps21 Rpl18a Rpl9 Rps23 Rpl38 Rpl32 Rpl36 Rpl30 Rpl11 Rpl26 Rps28 Rpl24
2.06068e-05	5	33	38.1139	Response to copper ion	http://amigo.geneontology.org/amigo/term/GO:0046688	App Mt3 Mt2 Mt1 mt-Co1
6.90865e-10	9	63	35.936	Ribosome assembly	http://amigo.geneontology.org/amigo/term/GO:0042255	Rps14 Rpsa Rps19 Rps10 Rpl38 Rpl11 Rpl3 Rps28 Rpl24
1.49784e-09	9	69	32.8111	Ribosomal small subunit biogenesis	http://amigo.geneontology.org/amigo/term/GO:0042274	Rps14 Rps24 Rpsa Rps21 Rps19 Rps8 Rps10 Rpl38 Rps28
8.09858e-05	5	44	28.5854	Maturation of SSU-rRNA	http://amigo.geneontology.org/amigo/term/GO:0030490	Rps14 Rps21 Rps19 Rps8 Rps28
2.5604e-05	6	66	22.8683	ATP synthesis coupled electron transport	http://amigo.geneontology.org/amigo/term/GO:0042773	mt-Nd1 mt-Nd2 mt-Co1 mt-Nd3 mt-Nd5 mt-Nd4l
9.19274e-34	39	640	15.3289	Translation	http://amigo.geneontology.org/amigo/term/GO:0006412	Rpl13 Rps11 Rplp1 Rpl19 Rps27a App Impact Rps14 Rps24 Rps3a1 Rps20 Rpsa Rps29 Lars2 Eef1a1 Fau Rps21 Rps19 Rpl21 Rpl37 Rpl18a Rpl37a Rpl27a Rpl9 Rps8 Rps23 Rpl38 Gapdh Rpl32 Rpl36 Rpl30 Rpl11 Rpl3 Rpl26 Rps12 Rps28 Rpl23 Rpl41 Rpl24
3.19266e-34	40	660	15.2456	Peptide biosynthetic process	http://amigo.geneontology.org/amigo/term/GO:0043043	Rpl13 Rps11 Slc1a2 Rplp1 Rpl19 Rps27a App Impact Rps14 Rps24 Rps3a1 Rps20 Rpsa Rps29 Lars2 Eef1a1 Fau Rps21 Rps19 Rpl21 Rpl37 Rpl18a Rpl37a Rpl27a Rpl9 Rps8 Rps23 Rpl38 Gapdh Rpl32 Rpl36 Rpl30 Rpl11 Rpl3 Rpl26 Rps12 Rps28 Rpl23 Rpl41 Rpl24
4.48462e-05	7	118	14.9226	Oxidative phosphorylation	http://amigo.geneontology.org/amigo/term/GO:0006119	Chchd10 mt-Nd1 mt-Nd2 mt-Co1 mt-Nd3 mt-Nd5 mt-Nd4l
4.84641e-32	40	776	12.9666	Amide biosynthetic process	http://amigo.geneontology.org/amigo/term/GO:0043604	Rpl13 Rps11 Slc1a2 Rplp1 Rpl19 Rps27a App Impact Rps14 Rps24 Rps3a1 Rps20 Rpsa Rps29 Lars2 Eef1a1 Fau Rps21 Rps19 Rpl21 Rpl37 Rpl18a Rpl37a Rpl27a Rpl9 Rps8 Rps23 Rpl38 Gapdh Rpl32 Rpl36 Rpl30 Rpl11 Rpl3 Rpl26 Rps12 Rps28 Rpl23 Rpl41 Rpl24
9.19274e-34	42	818	12.9159	Peptide metabolic process	http://amigo.geneontology.org/amigo/term/GO:0006518	Rpl13 Apoe Rps11 Slc1a2 Rplp1 Rpl19 Rps27a App Impact Rps14 Rps24 Rps3a1 Rps20 Rpsa Rps29 Lars2 Eef1a1 Cpe Fau Rps21 Rps19 Rpl21 Rpl37 Rpl18a Rpl37a Rpl27a Rpl9 Rps8 Rps23 Rpl38 Gapdh Rpl32 Rpl36 Rpl30 Rpl11 Rpl3 Rpl26 Rps12 Rps28 Rpl23 Rpl41 Rpl24
5.61756e-06	9	182	12.4394	Ribonucleoprotein complex assembly	http://amigo.geneontology.org/amigo/term/GO:0022618	Rps14 Rpsa Rps19 Rps10 Rpl38 Rpl11 Rpl3 Rps28 Rpl24
7.08867e-06	9	188	12.0424	Ribonucleoprotein complex subunit organization	http://amigo.geneontology.org/amigo/term/GO:0071826	Rps14 Rpsa Rps19 Rps10 Rpl38 Rpl11 Rpl3 Rps28 Rpl24
8.30496e-08	12	261	11.5656	ATP metabolic process	http://amigo.geneontology.org/amigo/term/GO:0046034	Atp1a2 Hspa8 App Chchd10 Gapdh mt-Nd1 mt-Nd2 mt-Co1 mt-Atp8 mt-Nd3 mt-Nd5 mt-Nd4l
2.10672e-08	13	288	11.3548	Ribosome biogenesis	http://amigo.geneontology.org/amigo/term/GO:0042254	Rps14 Rps24 Rpsa Rps21 Rps19 Rps8 Rps10 Rpl38 Rpl11 Rpl3 Rpl26 Rps28 Rpl24
5.40501e-32	44	1060	10.4418	Cellular amide metabolic process	http://amigo.geneontology.org/amigo/term/GO:0043603	Rpl13 Apoe Rps11 Psap Slc1a2 Rplp1 Rpl19 Rps27a App Impact Rps14 Rps24 Rps3a1 Rps20 Plpp3 Rpsa Rps29 Lars2 Eef1a1 Cpe Fau Rps21 Rps19 Rpl21 Rpl37 Rpl18a Rpl37a Rpl27a Rpl9 Rps8 Rps23 Rpl38 Gapdh Rpl32 Rpl36 Rpl30 Rpl11 Rpl3 Rpl26 Rps12 Rps28 Rpl23 Rpl41 Rpl24
1.31838e-06	13	413	7.91809	Ribonucleoprotein complex biogenesis	http://amigo.geneontology.org/amigo/term/GO:0022613	Rps14 Rps24 Rpsa Rps21 Rps19 Rps8 Rps10 Rpl38 Rpl11 Rpl3 Rpl26 Rps28 Rpl24
3.01463e-26	45	1552	7.2937	Organonitrogen compound biosynthetic process	http://amigo.geneontology.org/amigo/term/GO:1901566	Rpl13 Ckb Apoe Rps11 Slc1a2 Rplp1 Rpl19 Rps27a App Impact Rps14 Rps24 Itm2c Rps3a1 Rps20 Mt3 Rpsa Rps29 Lars2 Eef1a1 Fau Rps21 Rps19 Rpl21 Rpl37 Rpl18a Rpl37a Rpl27a Rpl9 Rps8 Rps23 Rpl38 Gapdh Rpl32 Rpl36 Rpl30 Rpl11 Rpl3 Rpl26 Rps12 mt-Atp8 Rps28 Rpl23 Rpl41 Rpl24
1.14234e-05	14	601	5.85977	Response to inorganic substance	http://amigo.geneontology.org/amigo/term/GO:0010035	Psap Sparc App Impact Cst3 Ppp3ca Mt3 Mt2 Mt1 Syt1 Calm2 Gapdh mt-Co1 mt-Nd5
3.8132e-07	25	1631	3.85579	Protein-containing complex subunit organization	http://amigo.geneontology.org/amigo/term/GO:0043933	Apoe Slc1a2 Hspa8 App Impact Rps14 Snap25 Rpsa Syt1 Calm2 Rps19 Chchd10 Tmsb4x Rps10 Rpl38 Rpl11 Rpl3 Tubb4a mt-Nd1 mt-Nd2 mt-Nd5 Rps28 Rpl23 Tmsb10 Rpl24
5.15803e-06	22	1457	3.79831	Protein-containing complex assembly	http://amigo.geneontology.org/amigo/term/GO:0065003	Apoe Slc1a2 App Impact Rps14 Snap25 Rpsa Syt1 Rps19 Chchd10 Tmsb4x Rps10 Rpl38 Rpl11 Rpl3 Tubb4a mt-Nd1 mt-Nd2 mt-Nd5 Rps28 Tmsb10 Rpl24
1.34219e-13	53	4547	2.9321	Cellular nitrogen compound biosynthetic process	http://amigo.geneontology.org/amigo/term/GO:0044271	Rpl13 Pfdn5 Apoe Rps11 Slc1a2 Rplp1 Hspa8 Rpl19 Rps27a Pomc App Impact Rps14 Rps24 Rps3a1 Ppp3ca Rps20 Plpp3 Mt3 Rpsa Rps29 Parm1 Lars2 Eef1a1 Fau Rps21 Rps19 Rpl21 Rpl37 Bex2 Rpl18a Rpl37a Rpl27a Rpl9 Rps8 Chchd10 Rps23 Tmsb4x Rpl38 Gapdh Rpl32 Rpl36 Rpl30 Rpl11 Rpl3 Rpl26 Rps12 mt-Atp8 Rps28 Rpl23 Ppia Rpl41 Rpl24
3.45555e-13	53	4657	2.86284	Cellular macromolecule biosynthetic process	http://amigo.geneontology.org/amigo/term/GO:0034645	Rpl13 Pfdn5 Apoe Rps11 Rplp1 Hspa8 Rpl19 Rps27a Pomc App Impact Rps14 Rps24 Itm2c Cst3 Rps3a1 Ppp3ca Rps20 Plpp3 Mt3 Rpsa Rps29 Parm1 Lars2 Eef1a1 Fau Rps21 Rps19 Rpl21 Rpl37 Bex2 Rpl18a Rpl37a Rpl27a Rpl9 Rps8 Chchd10 Rps23 Tmsb4x Rpl38 Gapdh Rpl32 Rpl36 Rpl30 Rpl11 Rpl3 Rpl26 Rps12 Rps28 Rpl23 Ppia Rpl41 Rpl24
4.45791e-13	53	4695	2.83967	Macromolecule biosynthetic process	http://amigo.geneontology.org/amigo/term/GO:0009059	Rpl13 Pfdn5 Apoe Rps11 Rplp1 Hspa8 Rpl19 Rps27a Pomc App Impact Rps14 Rps24 Itm2c Cst3 Rps3a1 Ppp3ca Rps20 Plpp3 Mt3 Rpsa Rps29 Parm1 Lars2 Eef1a1 Fau Rps21 Rps19 Rpl21 Rpl37 Bex2 Rpl18a Rpl37a Rpl27a Rpl9 Rps8 Chchd10 Rps23 Tmsb4x Rpl38 Gapdh Rpl32 Rpl36 Rpl30 Rpl11 Rpl3 Rpl26 Rps12 Rps28 Rpl23 Ppia Rpl41 Rpl24
9.83033e-11	50	4746	2.65014	Cellular protein metabolic process	http://amigo.geneontology.org/amigo/term/GO:0044267	Rpl13 Apoe Rps11 Psap Prkacb Rplp1 Hspa8 Rpl19 Rps27a App Impact Rps14 Rps24 Cst3 Rps3a1 Ppp3ca Rps20 Plpp3 Uchl1 Mt3 Rpsa Rps29 Lars2 Calm2 Eef1a1 Fau Rps21 Rps19 Rpl21 Rpl37 Rpl18a Rpl37a Rpl27a Rpl9 Rps8 Rps23 Rpl38 Gapdh Rpl32 Rpl36 Rpl30 Rpl11 Rpl3 Rpl26 Rps12 Rps28 Rpl23 Ppia Rpl41 Rpl24

## Sheet: ShinyGo 0.75 - GO Molec Funct
Enrichment FDR	nGenes	Pathway Genes	Fold Enrichment	Pathway	URL	Genes
2.78964e-06	4	9	111.801	Ubiquitin ligase inhibitor activity	http://amigo.geneontology.org/amigo/term/GO:1990948	Rps20 Rpl37 Rpl11 Rpl23
3.70824e-06	4	10	100.621	Ubiquitin-protein transferase inhibitor activity	http://amigo.geneontology.org/amigo/term/GO:0055105	Rps20 Rpl37 Rpl11 Rpl23
8.61949e-05	3	8	94.3319	Large ribosomal subunit rRNA binding	http://amigo.geneontology.org/amigo/term/GO:0070180	Rpl19 Rpl37a Rpl23
3.86548e-49	35	172	51.1879	Structural constituent of ribosome	http://amigo.geneontology.org/amigo/term/GO:0003735	Rpl13 Rps11 Rplp1 Rpl19 Rps27a Rps14 Rps24 Rps3a1 Rps20 Rpsa Rps29 Fau Rps21 Rps19 Rpl21 Rpl37 Rpl18a Rpl37a Rpl27a Rpl9 Rps8 Rps23 Rps10 Rpl38 Rpl32 Rpl36 Rpl30 Rpl11 Rpl3 Rpl26 Rps12 Rps28 Rpl23 Rpl41 Rpl24
4.28411e-06	5	27	46.5837	NADH dehydrogenase (ubiquinone) activity	http://amigo.geneontology.org/amigo/term/GO:0008137	mt-Nd1 mt-Nd2 mt-Nd3 mt-Nd5 mt-Nd4l
4.44818e-05	4	22	45.7367	Ubiquitin-protein transferase regulator activity	http://amigo.geneontology.org/amigo/term/GO:0055106	Rps20 Rpl37 Rpl11 Rpl23
4.45643e-06	5	28	44.92	NADH dehydrogenase (quinone) activity	http://amigo.geneontology.org/amigo/term/GO:0050136	mt-Nd1 mt-Nd2 mt-Nd3 mt-Nd5 mt-Nd4l
4.99806e-06	5	30	41.9253	NAD(P)H dehydrogenase (quinone) activity	http://amigo.geneontology.org/amigo/term/GO:0003955	mt-Nd1 mt-Nd2 mt-Nd3 mt-Nd5 mt-Nd4l
5.34282e-06	5	31	40.5729	NADH dehydrogenase activity	http://amigo.geneontology.org/amigo/term/GO:0003954	mt-Nd1 mt-Nd2 mt-Nd3 mt-Nd5 mt-Nd4l
0.0157638	2	13	38.7003	5S rRNA binding	http://amigo.geneontology.org/amigo/term/GO:0008097	Rpl11 Rpl3
0.0157638	2	13	38.7003	MDM2/MDM4 family protein binding	http://amigo.geneontology.org/amigo/term/GO:0097371	Rps20 Rpl37
9.73343e-10	9	69	32.8111	RRNA binding	http://amigo.geneontology.org/amigo/term/GO:0019843	Rps11 Rpl19 Rps14 Rpl37 Rpl37a Rpl9 Rpl11 Rpl3 Rpl23
1.47149e-05	5	39	32.2502	Oxidoreductase activity, acting on NAD(P)H, quinone or similar compound as acceptor	http://amigo.geneontology.org/amigo/term/GO:0016655	mt-Nd1 mt-Nd2 mt-Nd3 mt-Nd5 mt-Nd4l
5.41813e-06	6	61	24.7428	Oxidoreduction-driven active transmembrane transporter activity	http://amigo.geneontology.org/amigo/term/GO:0015453	mt-Nd1 mt-Nd2 mt-Co1 mt-Nd3 mt-Nd5 mt-Nd4l
0.00537785	3	35	21.5616	Translation initiation factor binding	http://amigo.geneontology.org/amigo/term/GO:0031369	Rps24 Rps3a1 Rps19
0.000243704	5	73	17.2296	Oxidoreductase activity, acting on NAD(P)H	http://amigo.geneontology.org/amigo/term/GO:0016651	mt-Nd1 mt-Nd2 mt-Nd3 mt-Nd5 mt-Nd4l
4.39024e-05	6	89	16.9585	Electron transfer activity	http://amigo.geneontology.org/amigo/term/GO:0009055	mt-Nd1 mt-Nd2 mt-Co1 mt-Nd3 mt-Nd5 mt-Nd4l
0.00205555	4	60	16.7701	Amyloid-beta binding	http://amigo.geneontology.org/amigo/term/GO:0001540	Pfdn5 Apoe Itm2c Cst3
1.07171e-33	38	612	15.6192	Structural molecule activity	http://amigo.geneontology.org/amigo/term/GO:0005198	Rpl13 Rps11 Rplp1 Rpl19 Sparc Rps27a Rps14 Rps24 Rps3a1 Rps20 Rpsa Rps29 Fau Rps21 Rps19 Rpl21 Rpl37 Rpl18a Rpl37a Rpl27a Rpl9 Rps8 Rps23 Rps10 Rpl38 Rpl32 Rpl36 Rpl30 Rpl11 Rpl3 Rpl26 Rps12 Tubb4a Rps28 Rpl23 Tuba1a Rpl41 Rpl24
0.00386472	4	76	13.2396	Enzyme inhibitor activity	http://amigo.geneontology.org/amigo/term/GO:0004857	Rps20 Rpl37 Rpl11 Rpl23
0.0029283	5	128	9.82624	Molecular function inhibitor activity	http://amigo.geneontology.org/amigo/term/GO:0140678	Rps20 Calm2 Rpl37 Rpl11 Rpl23
0.000243704	7	188	9.36629	Primary active transmembrane transporter activity	http://amigo.geneontology.org/amigo/term/GO:0015399	Atp1a2 mt-Nd1 mt-Nd2 mt-Co1 mt-Nd3 mt-Nd5 mt-Nd4l
0.00291824	7	288	6.1141	Peptide binding	http://amigo.geneontology.org/amigo/term/GO:0042277	Pfdn5 Apoe Hspa8 Itm2c Cst3 Ppp3ca Ppia
0.00375242	7	307	5.73571	Ubiquitin protein ligase binding	http://amigo.geneontology.org/amigo/term/GO:0031625	Ckb Prkacb Hspa8 Rps27a Uchl1 Rpl11 Rpl23
0.00209136	8	365	5.51346	Amide binding	http://amigo.geneontology.org/amigo/term/GO:0033218	Pfdn5 Apoe Psap Hspa8 Itm2c Cst3 Ppp3ca Ppia
0.00487592	7	325	5.41804	Ubiquitin-like protein ligase binding	http://amigo.geneontology.org/amigo/term/GO:0044389	Ckb Prkacb Hspa8 Rps27a Uchl1 Rpl11 Rpl23
0.0170272	6	303	4.98122	G protein-coupled receptor binding	http://amigo.geneontology.org/amigo/term/GO:0001664	Psap Hspa8 Pomc App Uchl1 Calm2
0.00374012	8	406	4.95668	Active transmembrane transporter activity	http://amigo.geneontology.org/amigo/term/GO:0022804	Slc1a2 Atp1a2 mt-Nd1 mt-Nd2 mt-Co1 mt-Nd3 mt-Nd5 mt-Nd4l
4.99806e-06	19	1163	4.10962	RNA binding	http://amigo.geneontology.org/amigo/term/GO:0003723	Rpl13 Rps11 Hspa8 Rpl19 Rps14 Rps3a1 Rps20 Eef1a1 Rps19 Rpl37 Rpl37a Rpl9 Rps10 Rpl30 Rpl11 Rpl3 Rpl26 Rpl23 Rpl24
0.011388	15	1502	2.51217	Signaling receptor binding	http://amigo.geneontology.org/amigo/term/GO:0005102	Apoe Psap Hspa8 Pomc App Plpp3 Uchl1 Syt1 Calm2 Cpe Bex2 Scg2 Rpl11 mt-Nd2 Ppia

## Sheet: ShinyGo 0.75 - KEGG
Enrichment FDR	nGenes	Pathway Genes	Fold Enrichment	Pathway	URL	Genes
3.56431e-52	34	130	65.7905	Ribosome	http://www.genome.jp/kegg-bin/show_pathway?mmu03010	Rpl13 Rps11 Rplp1 Rpl19 Rps27a Rps14 Rps24 Rps3a1 Rps20 Rpsa Rps29 Fau Rps21 Rps19 Rpl21 Rpl37 Rpl18a Rpl37a Rpl27a Rpl9 Rps23 Rps10 Rpl38 Rpl32 Rpl36 Rpl30 Rpl11 Rpl3 Rpl26 Rps12 Rps28 Rpl23 Rpl41 Rpl24
5.31405e-45	35	231	38.1139	Coronavirus disease	http://www.genome.jp/kegg-bin/show_pathway?mmu05171	Rpl13 Rps11 Rplp1 Rpl19 Rps27a Rps14 Rps24 Rps3a1 Rps20 Rpsa Rps29 Fau Rps21 Rps19 Rpl21 Rpl37 Rpl18a Rpl37a Rpl27a Rpl9 Rps8 Rps23 Rps10 Rpl38 Rpl32 Rpl36 Rpl30 Rpl11 Rpl3 Rpl26 Rps12 Rps28 Rpl23 Rpl41 Rpl24
0.0136509	3	54	13.9751	Mineral absorption	http://www.genome.jp/kegg-bin/show_pathway?mmu04978	Fth1 Mt2 Mt1
1.66394e-05	7	133	13.2396	Oxidative phosphorylation	http://www.genome.jp/kegg-bin/show_pathway?mmu00190	mt-Nd1 mt-Nd2 mt-Co1 mt-Atp8 mt-Nd3 mt-Nd5 mt-Nd4l
1.75783e-09	13	262	12.4816	Parkinson disease	http://www.genome.jp/kegg-bin/show_pathway?mmu05012	Prkacb Rps27a Uchl1 Calm2 Tubb4a mt-Nd1 mt-Nd2 mt-Co1 mt-Atp8 mt-Nd3 mt-Nd5 mt-Nd4l Tuba1a
0.0212933	3	66	11.4342	Long-term potentiation	http://www.genome.jp/kegg-bin/show_pathway?mmu04720	Prkacb Ppp3ca Calm2
1.88492e-08	12	266	11.3482	Prion disease	http://www.genome.jp/kegg-bin/show_pathway?mmu05020	Prkacb Hspa8 Ppp3ca Tubb4a mt-Nd1 mt-Nd2 mt-Co1 mt-Atp8 mt-Nd3 mt-Nd5 mt-Nd4l Tuba1a
0.0218236	3	68	11.0979	Amphetamine addiction	http://www.genome.jp/kegg-bin/show_pathway?mmu05031	Prkacb Ppp3ca Calm2
0.00031512	6	146	10.3377	Retrograde endocannabinoid signaling	http://www.genome.jp/kegg-bin/show_pathway?mmu04723	Prkacb mt-Nd1 mt-Nd2 mt-Nd3 mt-Nd5 mt-Nd4l
0.0272221	3	75	10.0621	Renin secretion	http://www.genome.jp/kegg-bin/show_pathway?mmu04924	Prkacb Ppp3ca Calm2
2.27199e-05	8	204	9.86477	Diabetic cardiomyopathy	http://www.genome.jp/kegg-bin/show_pathway?mmu05415	Gapdh mt-Nd1 mt-Nd2 mt-Co1 mt-Atp8 mt-Nd3 mt-Nd5 mt-Nd4l
0.0277789	3	77	9.80072	Synaptic vesicle cycle	http://www.genome.jp/kegg-bin/show_pathway?mmu04721	Slc1a2 Snap25 Syt1
1.1254e-08	14	380	9.2677	Alzheimer disease	http://www.genome.jp/kegg-bin/show_pathway?mmu05010	Apoe App Ppp3ca Calm2 Gapdh Tubb4a mt-Nd1 mt-Nd2 mt-Co1 mt-Atp8 mt-Nd3 mt-Nd5 mt-Nd4l Tuba1a
0.0342731	3	85	8.8783	Salivary secretion	http://www.genome.jp/kegg-bin/show_pathway?mmu04970	Prkacb Cst3 Calm2
4.72475e-05	8	228	8.82638	Thermogenesis	http://www.genome.jp/kegg-bin/show_pathway?mmu04714	Prkacb mt-Nd1 mt-Nd2 mt-Co1 mt-Atp8 mt-Nd3 mt-Nd5 mt-Nd4l
0.0342731	3	86	8.77506	Gap junction	http://www.genome.jp/kegg-bin/show_pathway?mmu04540	Prkacb Tubb4a Tuba1a
5.84382e-06	10	300	8.38506	Huntington disease	http://www.genome.jp/kegg-bin/show_pathway?mmu05016	Slc1a2 Tubb4a mt-Nd1 mt-Nd2 mt-Co1 mt-Atp8 mt-Nd3 mt-Nd5 mt-Nd4l Tuba1a
4.68661e-07	12	365	8.27019	Amyotrophic lateral sclerosis	http://www.genome.jp/kegg-bin/show_pathway?mmu05014	Slc1a2 Ppp3ca Chchd10 Tubb4a mt-Nd1 mt-Nd2 mt-Co1 mt-Atp8 mt-Nd3 mt-Nd5 mt-Nd4l Tuba1a
0.00031512	7	220	8.00392	Chemical carcinogenesis	http://www.genome.jp/kegg-bin/show_pathway?mmu05208	mt-Nd1 mt-Nd2 mt-Co1 mt-Atp8 mt-Nd3 mt-Nd5 mt-Nd4l
0.0496753	3	100	7.54655	Melanogenesis	http://www.genome.jp/kegg-bin/show_pathway?mmu04916	Prkacb Pomc Calm2
1.12943e-07	14	469	7.50901	Pathways of neurodegeneration	http://www.genome.jp/kegg-bin/show_pathway?mmu05022	Rps27a App Ppp3ca Uchl1 Calm2 Tubb4a mt-Nd1 mt-Nd2 mt-Co1 mt-Atp8 mt-Nd3 mt-Nd5 mt-Nd4l Tuba1a
0.019793	4	134	7.50901	Estrogen signaling pathway	http://www.genome.jp/kegg-bin/show_pathway?mmu04915	Prkacb Hspa8 Pomc Calm2

## Sheet: ShinyGo 0.75 - Biocarta
Enrichment FDR	nGenes	Pathway Genes	Fold Enrichment	Pathway	URL	Genes
4.4078e-05	4	20	50.3103	NOS1 PATHWAY	http://www.whichgenes.org/api/sources/musmusculus_BiocartaPathway/	Prkacb Ppp3ca Syt1 Calm2
0.0367528	1	5	50.3103	BOTULIN PATHWAY	http://www.whichgenes.org/api/sources/musmusculus_BiocartaPathway/	Snap25
0.0421031	1	6	41.9253	AKAP13 PATHWAY	http://www.whichgenes.org/api/sources/musmusculus_BiocartaPathway/	Prkacb
0.000324054	3	18	41.9253	CALCINEURIN PATHWAY	http://www.whichgenes.org/api/sources/musmusculus_BiocartaPathway/	Ppp3ca Syt1 Calm2
0.000324054	3	18	41.9253	MEF2D PATHWAY	http://www.whichgenes.org/api/sources/musmusculus_BiocartaPathway/	Ppp3ca Syt1 Calm2
0.000328893	3	19	39.7187	NDKDYNAMIN PATHWAY	http://www.whichgenes.org/api/sources/musmusculus_BiocartaPathway/	Ppp3ca Syt1 Calm2
6.6778e-05	4	26	38.7003	VIP PATHWAY	http://www.whichgenes.org/api/sources/musmusculus_BiocartaPathway/	Prkacb Ppp3ca Syt1 Calm2
0.00376693	2	14	35.936	CACAM PATHWAY	http://www.whichgenes.org/api/sources/musmusculus_BiocartaPathway/	Syt1 Calm2
0.000519952	3	23	32.8111	PGC1A PATHWAY	http://www.whichgenes.org/api/sources/musmusculus_BiocartaPathway/	Ppp3ca Syt1 Calm2
0.00463292	2	16	31.444	CK1 PATHWAY	http://www.whichgenes.org/api/sources/musmusculus_BiocartaPathway/	Prkacb Ppp3ca
0.000119294	4	33	30.4911	GPCR PATHWAY	http://www.whichgenes.org/api/sources/musmusculus_BiocartaPathway/	Prkacb Ppp3ca Syt1 Calm2
0.0046552	2	17	29.5943	CCR5 PATHWAY	http://www.whichgenes.org/api/sources/musmusculus_BiocartaPathway/	Syt1 Calm2
0.0046552	2	17	29.5943	GCR PATHWAY	http://www.whichgenes.org/api/sources/musmusculus_BiocartaPathway/	Syt1 Calm2
0.000754616	3	27	27.9502	NO1 PATHWAY	http://www.whichgenes.org/api/sources/musmusculus_BiocartaPathway/	Prkacb Syt1 Calm2
0.000843561	3	29	26.0226	HDAC PATHWAY	http://www.whichgenes.org/api/sources/musmusculus_BiocartaPathway/	Ppp3ca Syt1 Calm2
0.00123798	3	34	22.1957	BCR PATHWAY	http://www.whichgenes.org/api/sources/musmusculus_BiocartaPathway/	Ppp3ca Syt1 Calm2
0.00134851	3	37	20.3961	FMLP PATHWAY	http://www.whichgenes.org/api/sources/musmusculus_BiocartaPathway/	Ppp3ca Syt1 Calm2
0.00134851	3	37	20.3961	FCER1 PATHWAY	http://www.whichgenes.org/api/sources/musmusculus_BiocartaPathway/	Ppp3ca Syt1 Calm2
0.000324054	4	50	20.1241	NFAT PATHWAY	http://www.whichgenes.org/api/sources/musmusculus_BiocartaPathway/	Prkacb Ppp3ca Syt1 Calm2
0.00182375	3	42	17.968	TCR PATHWAY	http://www.whichgenes.org/api/sources/musmusculus_BiocartaPathway/	Ppp3ca Syt1 Calm2
0.011915	2	28	17.968	PYK2 PATHWAY	http://www.whichgenes.org/api/sources/musmusculus_BiocartaPathway/	Syt1 Calm2
0.0147008	2	32	15.722	AT1R PATHWAY	http://www.whichgenes.org/api/sources/musmusculus_BiocartaPathway/	Syt1 Calm2
0.0185595	2	37	13.5974	BIOPEPTIDES PATHWAY	http://www.whichgenes.org/api/sources/musmusculus_BiocartaPathway/	Syt1 Calm2

## Sheet: ShinyGo 0.75 - Reactome
Enrichment FDR	nGenes	Pathway Genes	Fold Enrichment	Pathway	URL	Genes
0.000354105	2	2	251.552	Response to metal ions	https://reactome.org/download/current	Mt3 Mt2
0.000354105	2	2	251.552	Metallothioneins bind metals	https://reactome.org/download/current	Mt3 Mt2
1.9927e-52	32	96	83.8506	SRP-dependent cotranslational protein targeting to membrane	https://reactome.org/download/current	Rpl13 Rps11 Rplp1 Rpl19 Rps27a Rps14 Rps24 Rps3a1 Rps20 Rpsa Rps29 Rps21 Rps19 Rpl21 Rpl37 Rpl18a Rpl27a Rpl9 Rps8 Rps23 Rps10 Rpl38 Rpl32 Rpl36 Rpl30 Rpl11 Rpl3 Rpl26 Rps12 Rps28 Rpl23 Rpl24
1.9927e-52	32	97	82.9861	Nonsense Mediated Decay NMD independent of the Exon Junction Complex EJC	https://reactome.org/download/current	Rpl13 Rps11 Rplp1 Rpl19 Rps27a Rps14 Rps24 Rps3a1 Rps20 Rpsa Rps29 Rps21 Rps19 Rpl21 Rpl37 Rpl18a Rpl27a Rpl9 Rps8 Rps23 Rps10 Rpl38 Rpl32 Rpl36 Rpl30 Rpl11 Rpl3 Rpl26 Rps12 Rps28 Rpl23 Rpl24
1.88317e-51	32	104	77.4005	Formation of a pool of free 40S subunits	https://reactome.org/download/current	Rpl13 Rps11 Rplp1 Rpl19 Rps27a Rps14 Rps24 Rps3a1 Rps20 Rpsa Rps29 Rps21 Rps19 Rpl21 Rpl37 Rpl18a Rpl27a Rpl9 Rps8 Rps23 Rps10 Rpl38 Rpl32 Rpl36 Rpl30 Rpl11 Rpl3 Rpl26 Rps12 Rps28 Rpl23 Rpl24
4.51916e-23	15	53	71.1939	Formation of the ternary complex and subsequently the 43S complex	https://reactome.org/download/current	Rps11 Rps27a Rps14 Rps24 Rps3a1 Rps20 Rpsa Rps29 Rps21 Rps19 Rps8 Rps23 Rps10 Rps12 Rps28
4.3845e-50	32	114	70.611	L13a-mediated translational silencing of Ceruloplasmin expression	https://reactome.org/download/current	Rpl13 Rps11 Rplp1 Rpl19 Rps27a Rps14 Rps24 Rps3a1 Rps20 Rpsa Rps29 Rps21 Rps19 Rpl21 Rpl37 Rpl18a Rpl27a Rpl9 Rps8 Rps23 Rps10 Rpl38 Rpl32 Rpl36 Rpl30 Rpl11 Rpl3 Rpl26 Rps12 Rps28 Rpl23 Rpl24
4.84802e-50	32	115	69.997	GTP hydrolysis and joining of the 60S ribosomal subunit	https://reactome.org/download/current	Rpl13 Rps11 Rplp1 Rpl19 Rps27a Rps14 Rps24 Rps3a1 Rps20 Rpsa Rps29 Rps21 Rps19 Rpl21 Rpl37 Rpl18a Rpl27a Rpl9 Rps8 Rps23 Rps10 Rpl38 Rpl32 Rpl36 Rpl30 Rpl11 Rpl3 Rpl26 Rps12 Rps28 Rpl23 Rpl24
8.96543e-50	32	118	68.2174	Nonsense-Mediated Decay NMD	https://reactome.org/download/current	Rpl13 Rps11 Rplp1 Rpl19 Rps27a Rps14 Rps24 Rps3a1 Rps20 Rpsa Rps29 Rps21 Rps19 Rpl21 Rpl37 Rpl18a Rpl27a Rpl9 Rps8 Rps23 Rps10 Rpl38 Rpl32 Rpl36 Rpl30 Rpl11 Rpl3 Rpl26 Rps12 Rps28 Rpl23 Rpl24
8.96543e-50	32	118	68.2174	Nonsense Mediated Decay NMD enhanced by the Exon Junction Complex EJC	https://reactome.org/download/current	Rpl13 Rps11 Rplp1 Rpl19 Rps27a Rps14 Rps24 Rps3a1 Rps20 Rpsa Rps29 Rps21 Rps19 Rpl21 Rpl37 Rpl18a Rpl27a Rpl9 Rps8 Rps23 Rps10 Rpl38 Rpl32 Rpl36 Rpl30 Rpl11 Rpl3 Rpl26 Rps12 Rps28 Rpl23 Rpl24
2.37359e-49	32	122	65.9808	Eukaryotic Translation Initiation	https://reactome.org/download/current	Rpl13 Rps11 Rplp1 Rpl19 Rps27a Rps14 Rps24 Rps3a1 Rps20 Rpsa Rps29 Rps21 Rps19 Rpl21 Rpl37 Rpl18a Rpl27a Rpl9 Rps8 Rps23 Rps10 Rpl38 Rpl32 Rpl36 Rpl30 Rpl11 Rpl3 Rpl26 Rps12 Rps28 Rpl23 Rpl24
2.37359e-49	32	122	65.9808	Cap-dependent Translation Initiation	https://reactome.org/download/current	Rpl13 Rps11 Rplp1 Rpl19 Rps27a Rps14 Rps24 Rps3a1 Rps20 Rpsa Rps29 Rps21 Rps19 Rpl21 Rpl37 Rpl18a Rpl27a Rpl9 Rps8 Rps23 Rps10 Rpl38 Rpl32 Rpl36 Rpl30 Rpl11 Rpl3 Rpl26 Rps12 Rps28 Rpl23 Rpl24
3.34546e-22	15	60	62.8879	Translation initiation complex formation	https://reactome.org/download/current	Rps11 Rps27a Rps14 Rps24 Rps3a1 Rps20 Rpsa Rps29 Rps21 Rps19 Rps8 Rps23 Rps10 Rps12 Rps28
3.34546e-22	15	60	62.8879	Ribosomal scanning and start codon recognition	https://reactome.org/download/current	Rps11 Rps27a Rps14 Rps24 Rps3a1 Rps20 Rpsa Rps29 Rps21 Rps19 Rps8 Rps23 Rps10 Rps12 Rps28
4.18988e-22	15	61	61.857	Activation of the mRNA upon binding of the cap-binding complex and eIFs and subsequent binding to 43S	https://reactome.org/download/current	Rps11 Rps27a Rps14 Rps24 Rps3a1 Rps20 Rpsa Rps29 Rps21 Rps19 Rps8 Rps23 Rps10 Rps12 Rps28
2.21199e-43	32	181	44.4732	Major pathway of rRNA processing in the nucleolus and cytosol	https://reactome.org/download/current	Rpl13 Rps11 Rplp1 Rpl19 Rps27a Rps14 Rps24 Rps3a1 Rps20 Rpsa Rps29 Rps21 Rps19 Rpl21 Rpl37 Rpl18a Rpl27a Rpl9 Rps8 Rps23 Rps10 Rpl38 Rpl32 Rpl36 Rpl30 Rpl11 Rpl3 Rpl26 Rps12 Rps28 Rpl23 Rpl24
2.21199e-43	32	181	44.4732	RRNA processing	https://reactome.org/download/current	Rpl13 Rps11 Rplp1 Rpl19 Rps27a Rps14 Rps24 Rps3a1 Rps20 Rpsa Rps29 Rps21 Rps19 Rpl21 Rpl37 Rpl18a Rpl27a Rpl9 Rps8 Rps23 Rps10 Rpl38 Rpl32 Rpl36 Rpl30 Rpl11 Rpl3 Rpl26 Rps12 Rps28 Rpl23 Rpl24
2.21199e-43	32	181	44.4732	RRNA processing in the nucleus and cytosol	https://reactome.org/download/current	Rpl13 Rps11 Rplp1 Rpl19 Rps27a Rps14 Rps24 Rps3a1 Rps20 Rpsa Rps29 Rps21 Rps19 Rpl21 Rpl37 Rpl18a Rpl27a Rpl9 Rps8 Rps23 Rps10 Rpl38 Rpl32 Rpl36 Rpl30 Rpl11 Rpl3 Rpl26 Rps12 Rps28 Rpl23 Rpl24
0.00111369	3	19	39.7187	Protein methylation	https://reactome.org/download/current	Hspa8 Calm2 Eef1a1
0.00120597	3	20	37.7328	GABA synthesis release reuptake and degradation	https://reactome.org/download/current	Hspa8 Snap25 Syt1
1.53369e-41	33	232	35.7811	Translation	https://reactome.org/download/current	Rpl13 Rps11 Rplp1 Rpl19 Rps27a Rps14 Rps24 Rps3a1 Rps20 Rpsa Rps29 Eef1a1 Rps21 Rps19 Rpl21 Rpl37 Rpl18a Rpl27a Rpl9 Rps8 Rps23 Rps10 Rpl38 Rpl32 Rpl36 Rpl30 Rpl11 Rpl3 Rpl26 Rps12 Rps28 Rpl23 Rpl24
0.00207858	3	25	30.1862	Glutamate Neurotransmitter Release Cycle	https://reactome.org/download/current	Slc1a2 Snap25 Syt1
0.00104469	4	51	19.7295	Neurotransmitter release cycle	https://reactome.org/download/current	Slc1a2 Hspa8 Snap25 Syt1
0.00120531	4	54	18.6335	Complex I biogenesis	https://reactome.org/download/current	mt-Nd1 mt-Nd2 mt-Nd3 mt-Nd5
0.0015255	4	59	17.0544	Respiratory electron transport	https://reactome.org/download/current	mt-Nd1 mt-Nd2 mt-Nd3 mt-Nd5
3.26355e-29	33	539	15.4011	Metabolism of RNA	https://reactome.org/download/current	Rpl13 Rps11 Rplp1 Hspa8 Rpl19 Rps27a Rps14 Rps24 Rps3a1 Rps20 Rpsa Rps29 Rps21 Rps19 Rpl21 Rpl37 Rpl18a Rpl27a Rpl9 Rps8 Rps23 Rps10 Rpl38 Rpl32 Rpl36 Rpl30 Rpl11 Rpl3 Rpl26 Rps12 Rps28 Rpl23 Rpl24
0.000461221	5	84	14.9733	Respiratory electron transport ATP synthesis by chemiosmotic coupling and heat production by uncoupling proteins.	https://reactome.org/download/current	mt-Nd1 mt-Nd2 mt-Atp8 mt-Nd3 mt-Nd5
0.00149678	5	112	11.23	Post-translational protein phosphorylation	https://reactome.org/download/current	Apoe App Chgb Cst3 Scg2
0.00178388	5	118	10.659	Regulation of Insulin-like Growth Factor IGF transport and uptake by Insulin-like Growth Factor Binding Proteins IGFBPs	https://reactome.org/download/current	Apoe App Chgb Cst3 Scg2
9.36129e-25	44	1685	6.56871	Metabolism of proteins	https://reactome.org/download/current	Rpl13 Apoe Rps11 Rplp1 Hspa8 Rpl19 Rps27a Pomc App Rps14 Rps24 Chgb Cst3 Rps3a1 Rps20 Uchl1 Rpsa Rps29 Calm2 Eef1a1 Rps21 Rps19 Rpl21 Rpl37 Rpl18a Rpl27a Rpl9 Rps8 Rps23 Scg2 Rps10 Rpl38 Rpl32 Rpl36 Rpl30 Rpl11 Rpl3 Rpl26 Rps12 Tubb4a Rps28 Rpl23 Tuba1a Rpl24
