# Supplementary material for: Cell-specific transcriptome changes in the hypothalamic arcuate nucleus in a mouse deoxycorticosterone acetate-salt model of hypertension
Source: Front Cell Neurosci. 2023 May 24;17:1207350. doi: 10.3389/fncel.2023.1207350 (PMC10244568; doi:10.3389/fncel.2023.1207350)
Supplement: Supplementary file 13 [file Data_Sheet_13.XLSX]

## Sheet: ShinyGo 0.75 - Go Bio Process
Table S18 - N_SC2 Agrp.Npy.Acvr1c DOCA DEGs Enrichment Results
Enrichment FDR	nGenes	Pathway Genes	Fold Enrichment	Pathway	URL	Genes
3.53106e-05	11	244	7.41819	Glial cell differentiation	http://amigo.geneontology.org/amigo/term/GO:0010001	Sox9 Gfap Id4 App Plp1 Cspg5 Mobp Kcnj10 Dmd Gap43 Qk
6.75578e-10	25	699	5.88515	Anterograde trans-synaptic signaling	http://amigo.geneontology.org/amigo/term/GO:0098916	Gabrg1 Apoe Calb2 Syn2 Gfap Cartpt App Cplx2 Snca Pdyn Ppp3ca Gabrb1 Gabre Cspg5 Pcdh17 Vgf Plcl1 Kcnj10 Tubb2b Pnoc Sv2c Ywhag Tac1 Nrxn3 Syne1
6.75578e-10	25	699	5.88515	Chemical synaptic transmission	http://amigo.geneontology.org/amigo/term/GO:0007268	Gabrg1 Apoe Calb2 Syn2 Gfap Cartpt App Cplx2 Snca Pdyn Ppp3ca Gabrb1 Gabre Cspg5 Pcdh17 Vgf Plcl1 Kcnj10 Tubb2b Pnoc Sv2c Ywhag Tac1 Nrxn3 Syne1
3.10925e-06	16	449	5.86366	Regulation of membrane potential	http://amigo.geneontology.org/amigo/term/GO:0042391	Gabrg1 App Snca Pex5l Ppp3ca Gabrb1 Gabre Atp1a1 Kcnj10 Dmd Chchd10 Camk2d Slc4a4 Tac1 Scn9a Syne1
6.75578e-10	25	707	5.81856	Trans-synaptic signaling	http://amigo.geneontology.org/amigo/term/GO:0099537	Gabrg1 Apoe Calb2 Syn2 Gfap Cartpt App Cplx2 Snca Pdyn Ppp3ca Gabrb1 Gabre Cspg5 Pcdh17 Vgf Plcl1 Kcnj10 Tubb2b Pnoc Sv2c Ywhag Tac1 Nrxn3 Syne1
2.10407e-06	17	492	5.68563	Modulation of chemical synaptic transmission	http://amigo.geneontology.org/amigo/term/GO:0050804	Apoe Calb2 Gfap App Cplx2 Snca Ppp3ca Cspg5 Pcdh17 Vgf Plcl1 Kcnj10 Tubb2b Ywhag Tac1 Nrxn3 Syne1
2.10407e-06	17	493	5.6741	Regulation of trans-synaptic signaling	http://amigo.geneontology.org/amigo/term/GO:0099177	Apoe Calb2 Gfap App Cplx2 Snca Ppp3ca Cspg5 Pcdh17 Vgf Plcl1 Kcnj10 Tubb2b Ywhag Tac1 Nrxn3 Syne1
1.44074e-09	25	738	5.57415	Synaptic signaling	http://amigo.geneontology.org/amigo/term/GO:0099536	Gabrg1 Apoe Calb2 Syn2 Gfap Cartpt App Cplx2 Snca Pdyn Ppp3ca Gabrb1 Gabre Cspg5 Pcdh17 Vgf Plcl1 Kcnj10 Tubb2b Pnoc Sv2c Ywhag Tac1 Nrxn3 Syne1
7.88511e-06	17	553	5.05846	Signal release	http://amigo.geneontology.org/amigo/term/GO:0023061	Syn2 Pomc Cartpt Gal Cplx2 Snca Ghrh Pex5l Ppp3ca Cspg5 Vgf Ildr2 Isl1 Tac1 Nrxn3 Nnat Pcp4
3.53106e-05	15	488	5.05785	Blood circulation	http://amigo.geneontology.org/amigo/term/GO:0008015	Apoe Atp2b1 Pomc Cartpt App Epas1 Pde4b Atp1a1 Pik3r1 Isl1 Dmd Ar Ncald Camk2d Tac1
5.45484e-06	18	604	4.90377	Regulation of system process	http://amigo.geneontology.org/amigo/term/GO:0044057	Apoe Atp2b1 Pomc Cartpt App Epas1 Gal Pex5l Ppp3ca Pde4b Atp1a1 Pik3r1 Isl1 Kcnj10 Dmd Camk2d Tac1 Syne1
3.2406e-05	18	701	4.22522	Regulation of plasma membrane bounded cell projection organization	http://amigo.geneontology.org/amigo/term/GO:0120035	Apoe Ctsz Sema6a Gfap App Itm2c Sema6d Ppp3ca Auts2 Rreb1 Pik3r1 Dmd Gap43 Fut9 Spock1 Qk Pcp4 Syne1
1.5274e-07	26	1014	4.2192	Central nervous system development	http://amigo.geneontology.org/amigo/term/GO:0007417	Sox9 Atp2b1 Gfap Id4 Otp App Pam Sema6d Cst3 Ghrh Ppp3ca Gabrb1 Plp1 Mobp Acsl3 Ndn Slc32a1 Isl1 Kcnj10 Dmd Cited1 Pcdh19 Pcdh9 Qk Nnat Marcks
1.76004e-06	23	905	4.18191	Export from cell	http://amigo.geneontology.org/amigo/term/GO:0140352	Apoe Syn2 Ptgds Atp2b1 Pomc Cartpt Gal Cplx2 Snca Pam Ghrh Pex5l Ppp3ca Cspg5 Atp1a1 Vgf Ildr2 Isl1 Slc4a4 Tac1 Nrxn3 Nnat Pcp4
3.2406e-05	20	857	3.84011	Secretion by cell	http://amigo.geneontology.org/amigo/term/GO:0032940	Apoe Syn2 Ptgds Pomc Cartpt Gal Cplx2 Snca Pam Ghrh Pex5l Ppp3ca Cspg5 Vgf Ildr2 Isl1 Tac1 Nrxn3 Nnat Pcp4
5.97305e-09	34	1496	3.73975	Cell-cell signaling	http://amigo.geneontology.org/amigo/term/GO:0007267	Sox9 Gabrg1 Apoe Calb2 Syn2 Pomc Gfap Cartpt App Gal Cplx2 Snca Pdyn Ghrh Pex5l Ppp3ca Gabrb1 Gabre Cspg5 Pcdh17 Vgf Plcl1 Ildr2 Isl1 Kcnj10 Tubb2b Pnoc Sv2c Ywhag Tac1 Nrxn3 Nnat Pcp4 Syne1
1.71737e-05	23	1064	3.55698	Neuron projection development	http://amigo.geneontology.org/amigo/term/GO:0031175	Apoe Ctsz Sema6a Gfap Stmn4 App Itm2c Sema6d Ppp3ca Auts2 Plp1 Ndn Isl1 Dmd Tubb2b Gap43 Fut9 Spock1 Qk Tubb3 Pcp4 Syne1 Rpl24
3.2406e-05	22	1029	3.51805	Secretion	http://amigo.geneontology.org/amigo/term/GO:0046903	Apoe Prlr Syn2 Ptgds Pomc Cartpt Gal Cplx2 Snca Pam Ghrh Pex5l Ppp3ca Cspg5 Acsl3 Vgf Ildr2 Isl1 Tac1 Nrxn3 Nnat Pcp4
3.09755e-12	50	2409	3.41529	Nervous system development	http://amigo.geneontology.org/amigo/term/GO:0007399	Sox9 Apoe Rbfox1 Ctsz Sema6a Atp2b1 Gfap Id4 Otp Stmn4 App Gal Cplx2 Snca Itm2c Pam Sema6d Cst3 Ghrh Ppp3ca Gabrb1 Auts2 Plp1 Cspg5 Mobp Acsl3 Ndn Pcdh17 Slc32a1 Pik3r1 Mbp Isl1 Kcnj10 Dmd Tubb2b Gap43 Cited1 Pcdh19 Ywhag Fut9 Pcdh9 Spock1 Qk Tubb3 Nrxn3 Nnat Marcks Pcp4 Syne1 Rpl24
3.2406e-05	24	1206	3.2746	Neuron development	http://amigo.geneontology.org/amigo/term/GO:0048666	Apoe Ctsz Sema6a Gfap Stmn4 App Itm2c Sema6d Ppp3ca Gabrb1 Auts2 Plp1 Ndn Isl1 Dmd Tubb2b Gap43 Fut9 Spock1 Qk Tubb3 Pcp4 Syne1 Rpl24
3.09485e-06	29	1470	3.2462	Neuron differentiation	http://amigo.geneontology.org/amigo/term/GO:0030182	Sox9 Apoe Ctsz Sema6a Gfap Id4 Otp Stmn4 App Itm2c Sema6d Ppp3ca Gabrb1 Auts2 Plp1 Acsl3 Ndn Isl1 Dmd Tubb2b Gap43 Ywhag Fut9 Spock1 Qk Tubb3 Pcp4 Syne1 Rpl24
3.10925e-06	32	1765	2.98332	Neurogenesis	http://amigo.geneontology.org/amigo/term/GO:0022008	Sox9 Apoe Ctsz Sema6a Gfap Id4 Otp Stmn4 App Itm2c Sema6d Ppp3ca Gabrb1 Auts2 Plp1 Cspg5 Mobp Acsl3 Ndn Isl1 Kcnj10 Dmd Tubb2b Gap43 Ywhag Fut9 Spock1 Qk Tubb3 Pcp4 Syne1 Rpl24
1.82618e-05	29	1627	2.93295	Generation of neurons	http://amigo.geneontology.org/amigo/term/GO:0048699	Sox9 Apoe Ctsz Sema6a Gfap Id4 Otp Stmn4 App Itm2c Sema6d Ppp3ca Gabrb1 Auts2 Plp1 Acsl3 Ndn Isl1 Dmd Tubb2b Gap43 Ywhag Fut9 Spock1 Qk Tubb3 Pcp4 Syne1 Rpl24
7.4765e-06	32	1841	2.86017	Regulation of transport	http://amigo.geneontology.org/amigo/term/GO:0051049	Apoe Atp2b1 Pomc Gfap Cartpt App Gal Cplx2 Snca Pam Ghrh Pex5l Ppp3ca Pde4b Plp1 Cspg5 Acsl3 Atp1a1 Mlc1 Pik3r1 Isl1 Kcnj10 Dmd Chchd10 Camk2d Tac1 Ifi27 Nrxn3 Nnat Scn9a Pcp4 Syne1
2.10407e-06	38	2322	2.69288	Cell development	http://amigo.geneontology.org/amigo/term/GO:0048468	Sox9 Apoe Pou2f2 Ctsz Sema6a Gfap 4930447C04Rik Id4 Otp Stmn4 App Epas1 Paqr8 Itm2c Sema6d Cst3 Ppp3ca Gabrb1 Auts2 Plp1 Cspg5 Mobp Ndn Rreb1 Isl1 Kcnj10 Dmd Tubb2b Ar Gap43 Camk2d Fut9 Spock1 Qk Tubb3 Pcp4 Syne1 Rpl24
6.75578e-10	58	3751	2.54434	Regulation of biological quality	http://amigo.geneontology.org/amigo/term/GO:0065008	Sox9 Gabrg1 Apoe Calb2 Prlr Syn2 Sparc Sema6a Atp2b1 Pomc Gfap Cartpt Erbin App Epas1 Gal Cplx2 Snca Pam Sema6d Ghrh Pex5l Ppp3ca Pde4b Gabrb1 Sparcl1 Gabre Rnf128 Mt2 Cspg5 Camkv Atp1a1 Ndn Lars2 Vgf Plcl1 Ildr2 Pik3r1 Mbp Isl1 Kcnj10 Dmd Ar Chchd10 Tmsb4x Ncald Ywhag Camk2d Rpl11 Slc4a4 Tac1 Qk Nrxn3 Nnat Gad1 Tuba1a Scn9a Syne1
1.61331e-06	43	2821	2.50819	Regulation of localization	http://amigo.geneontology.org/amigo/term/GO:0032879	Sox9 Apoe Sparc Sema6a Atp2b1 Pomc Gfap Cartpt App Gal Cplx2 Snca Pam Ppp2r5a Sema6d Ghrh Pex5l Ppp3ca Pde4b Plp1 Cspg5 Acsl3 Atp1a1 Pcdh17 Mlc1 Rreb1 Pik3r1 Isl1 Kcnj10 Dmd Tubb2b Ar Chchd10 Tmsb4x Camk2d Fut9 Tac1 Ifi27 Nrxn3 Nnat Scn9a Pcp4 Syne1
3.80124e-08	63	4822	2.14985	System development	http://amigo.geneontology.org/amigo/term/GO:0048731	Sox9 Apoe Prlr Pou2f2 Rbfox1 Ctsz Sparc Sema6a Atp2b1 Gfap Id4 Cartpt Otp Stmn4 App Epas1 Gal Cplx2 Snca Itm2c Pam Sema6d Cst3 Ghrh Ppp3ca Gabrb1 Auts2 Tmem176b Plp1 Cspg5 Mobp Acsl3 Ndn Pcdh17 Csgalnact1 Vgf Slc32a1 Rreb1 Ildr2 Pik3r1 Mbp Isl1 Kcnj10 Dmd Tubb2b Ar Gap43 Cited1 Pcdh19 Ywhag Camk2d Fut9 Pcdh9 Spock1 Rpl38 Qk Tubb3 Nrxn3 Nnat Marcks Pcp4 Syne1 Rpl24
1.27581e-05	53	4330	2.01411	Cell differentiation	http://amigo.geneontology.org/amigo/term/GO:0030154	Sox9 Apoe Prlr Pou2f2 Rbfox1 Ctsz Aldoc Sema6a Gfap 4930447C04Rik Id4 Cartpt Otp Stmn4 Sema5a App Epas1 Cplx2 Paqr8 Itm2c Sema6d Cst3 Ppp3ca Gabrb1 Auts2 Tmem176b Plp1 Cspg5 Mobp Rpsa Acsl3 Ndn Rreb1 Ildr2 Pik3r1 Isl1 Pbxip1 Kcnj10 Dmd Tubb2b Ar Gap43 Tmsb4x Cited1 Ywhag Camk2d Fut9 Spock1 Qk Tubb3 Pcp4 Syne1 Rpl24
1.98699e-05	53	4404	1.98027	Cellular developmental process	http://amigo.geneontology.org/amigo/term/GO:0048869	Sox9 Apoe Prlr Pou2f2 Rbfox1 Ctsz Aldoc Sema6a Gfap 4930447C04Rik Id4 Cartpt Otp Stmn4 Sema5a App Epas1 Cplx2 Paqr8 Itm2c Sema6d Cst3 Ppp3ca Gabrb1 Auts2 Tmem176b Plp1 Cspg5 Mobp Rpsa Acsl3 Ndn Rreb1 Ildr2 Pik3r1 Isl1 Pbxip1 Kcnj10 Dmd Tubb2b Ar Gap43 Tmsb4x Cited1 Ywhag Camk2d Fut9 Spock1 Qk Tubb3 Pcp4 Syne1 Rpl24

## Sheet: ShinyGo 0.75 - GO Molec Funct
Enrichment FDR	nGenes	Pathway Genes	Fold Enrichment	Pathway	URL	Genes
0.00810413	2	4	82.2744	Opioid peptide activity	http://amigo.geneontology.org/amigo/term/GO:0001515	Pdyn Pnoc
0.002212	3	10	49.3647	Structural constituent of myelin sheath	http://amigo.geneontology.org/amigo/term/GO:0019911	Plp1 Mobp Mbp
0.00445879	3	13	37.9728	GABA-gated chloride ion channel activity	http://amigo.geneontology.org/amigo/term/GO:0022851	Gabrg1 Gabrb1 Gabre
0.00548205	3	16	30.8529	GABA receptor binding	http://amigo.geneontology.org/amigo/term/GO:0050811	Gabrg1 Gabrb1 Plcl1
0.00607495	3	17	29.038	Lamin binding	http://amigo.geneontology.org/amigo/term/GO:0005521	Dmd Ifi27 Syne1
0.00792011	3	19	25.9814	GABA-A receptor activity	http://amigo.geneontology.org/amigo/term/GO:0004890	Gabrg1 Gabrb1 Gabre
0.00182707	4	26	25.3152	Neuropeptide hormone activity	http://amigo.geneontology.org/amigo/term/GO:0005184	Cartpt Gal Ghrh Vgf
0.00849818	3	21	23.507	Ligand-gated anion channel activity	http://amigo.geneontology.org/amigo/term/GO:0099095	Gabrg1 Gabrb1 Gabre
0.00849818	3	22	22.4385	GABA receptor activity	http://amigo.geneontology.org/amigo/term/GO:0016917	Gabrg1 Gabrb1 Gabre
0.00849818	3	22	22.4385	Semaphorin receptor binding	http://amigo.geneontology.org/amigo/term/GO:0030215	Sema6a Sema5a Sema6d
0.00511829	4	38	17.3209	Neuropeptide receptor binding	http://amigo.geneontology.org/amigo/term/GO:0071855	Pomc Gal Ghrh Tac1
1.76007e-05	10	172	9.56679	Structural constituent of ribosome	http://amigo.geneontology.org/amigo/term/GO:0003735	Rpl14 Rpsa Rps21 Rpl21 Rpl27a Rpl38 Rpl11 Rpl3 Rpl26 Rpl24
0.0200288	4	71	9.27036	Structural constituent of cytoskeleton	http://amigo.geneontology.org/amigo/term/GO:0005200	Gfap Tubb2b Tubb3 Tuba1a
0.000238407	9	183	8.09257	Calmodulin binding	http://amigo.geneontology.org/amigo/term/GO:0005516	Atp2b1 Ppp3ca Camkv Pik3r1 Mbp Gap43 Camk2d Marcks Pcp4
0.0247191	5	131	6.28049	Ligand-gated ion channel activity	http://amigo.geneontology.org/amigo/term/GO:0015276	Gabrg1 Pex5l Gabrb1 Gabre Kcnj10
0.0247191	5	132	6.23291	Hormone activity	http://amigo.geneontology.org/amigo/term/GO:0005179	Pomc Cartpt Gal Ghrh Vgf
0.0254807	5	134	6.13988	Ligand-gated channel activity	http://amigo.geneontology.org/amigo/term/GO:0022834	Gabrg1 Pex5l Gabrb1 Gabre Kcnj10
2.97897e-06	19	612	5.10854	Structural molecule activity	http://amigo.geneontology.org/amigo/term/GO:0005198	Sparc Gfap Rpl14 Plp1 Mobp Rpsa Rps21 Rpl21 Mbp Dmd Tubb2b Rpl27a Rpl38 Rpl11 Rpl3 Rpl26 Tubb3 Tuba1a Rpl24
0.00957495	8	288	4.5708	Peptide binding	http://amigo.geneontology.org/amigo/term/GO:0042277	Apoe Prlr Itm2c Cst3 Pex5l Ppp3ca Pik3r1 Tubb3
0.0302686	8	365	3.60655	Amide binding	http://amigo.geneontology.org/amigo/term/GO:0033218	Apoe Prlr Itm2c Cst3 Pex5l Ppp3ca Pik3r1 Tubb3
0.00849818	11	508	3.56307	Receptor ligand activity	http://amigo.geneontology.org/amigo/term/GO:0048018	Sema6a Pomc Cartpt App Gal Sema6d Pdyn Ghrh Vgf Pnoc Tac1
0.00849818	11	513	3.52834	Signaling receptor activator activity	http://amigo.geneontology.org/amigo/term/GO:0030546	Sema6a Pomc Cartpt App Gal Sema6d Pdyn Ghrh Vgf Pnoc Tac1
0.0281606	9	443	3.34298	Actin binding	http://amigo.geneontology.org/amigo/term/GO:0003779	Snca Macf1 Mobp Dmd Tmsb4x Ncald Ywhag Marcks Syne1
0.0140956	11	556	3.25546	Signaling receptor regulator activity	http://amigo.geneontology.org/amigo/term/GO:0030545	Sema6a Pomc Cartpt App Gal Sema6d Pdyn Ghrh Vgf Pnoc Tac1
0.00548205	14	709	3.2492	Calcium ion binding	http://amigo.geneontology.org/amigo/term/GO:0005509	Calb2 Sparc Snca Pam Macf1 Sparcl1 Pcdh17 Pcdh10 Pcdh19 Ncald Pcdh9 Spock1 Hpcal1 Pcp4
0.00511829	15	786	3.14025	Protein domain specific binding	http://amigo.geneontology.org/amigo/term/GO:0019904	Pou2f2 Atp2b1 App Son Snca Arhgap6 Acsl3 Atp1a1 Pik3r1 Dmd Ar Cited1 Ywhag Qk Tuba1a
1.76007e-05	28	1502	3.06749	Signaling receptor binding	http://amigo.geneontology.org/amigo/term/GO:0005102	Gabrg1 Apoe Prlr Sema6a Pomc Gfap Cartpt Erbin Sema5a App Gal Sema6d Pdyn Ghrh Gabrb1 Vgf Plcl1 Pik3r1 Bex2 Kcnj10 Dmd Pnoc Ar Ywhag Rpl11 Tac1 Tubb3 Syne1
0.0085683	16	987	2.66746	Cytoskeletal protein binding	http://amigo.geneontology.org/amigo/term/GO:0008092	Apoe Aldoc Stmn4 Snca Pde4b Macf1 Mobp Atp1a1 Ndn Dmd Tmsb4x Ncald Ywhag Camk2d Marcks Syne1
0.0194025	23	1869	2.02495	Molecular function regulator	http://amigo.geneontology.org/amigo/term/GO:0098772	Apoe Sema6a Timp3 Pomc Id4 Cartpt App Gal Snca Ppp2r5a Sema6d Pdyn Cst3 Ghrh Arhgap6 Vgf Pik3r1 Pnoc Camk2d Spock1 Rpl11 Tac1 Nrxn3
0.0247191	25	2164	1.90098	Enzyme binding	http://amigo.geneontology.org/amigo/term/GO:0019899	Sox9 Prlr Lcorl Timp3 Gfap App Epas1 Snca Pam Ppp2r5a Cst3 Pex5l Ppp3ca Arhgap6 Acsl3 Atp1a1 Pik3r1 Mbp Dmd Ar Ywhag Camk2d Rpl11 Marcks Syne1

## Sheet: ShinyGo 0.75 - Reactome
Enrichment FDR	nGenes	Pathway Genes	Fold Enrichment	Pathway	URL	Genes
0.00259219	3	16	30.8529	Microtubule-dependent trafficking of connexons from Golgi to the plasma membrane	https://reactome.org/download/current	Tubb2b Tubb3 Tuba1a
0.00295959	3	17	29.038	Transport of connexons to the plasma membrane	https://reactome.org/download/current	Tubb2b Tubb3 Tuba1a
0.0104377	3	27	18.2832	Carboxyterminal post-translational modifications of tubulin	https://reactome.org/download/current	Tubb2b Tubb3 Tuba1a
7.44851e-08	10	96	17.1405	SRP-dependent cotranslational protein targeting to membrane	https://reactome.org/download/current	Rpl14 Rpsa Rps21 Rpl21 Rpl27a Rpl38 Rpl11 Rpl3 Rpl26 Rpl24
7.44851e-08	10	97	16.9638	Nonsense Mediated Decay NMD independent of the Exon Junction Complex EJC	https://reactome.org/download/current	Rpl14 Rpsa Rps21 Rpl21 Rpl27a Rpl38 Rpl11 Rpl3 Rpl26 Rpl24
0.0130531	3	30	16.4549	RHO GTPases activate IQGAPs	https://reactome.org/download/current	Tubb2b Tubb3 Tuba1a
0.0137883	3	31	15.9241	The role of GTSE1 in G2/M progression after G2 checkpoint	https://reactome.org/download/current	Tubb2b Tubb3 Tuba1a
9.9426e-08	10	104	15.822	Formation of a pool of free 40S subunits	https://reactome.org/download/current	Rpl14 Rpsa Rps21 Rpl21 Rpl27a Rpl38 Rpl11 Rpl3 Rpl26 Rpl24
0.0145415	3	32	15.4265	Gap junction assembly	https://reactome.org/download/current	Tubb2b Tubb3 Tuba1a
0.0163433	3	34	14.519	Recycling pathway of L1	https://reactome.org/download/current	Tubb2b Tubb3 Tuba1a
1.48088e-07	10	114	14.4341	L13a-mediated translational silencing of Ceruloplasmin expression	https://reactome.org/download/current	Rpl14 Rpsa Rps21 Rpl21 Rpl27a Rpl38 Rpl11 Rpl3 Rpl26 Rpl24
1.48088e-07	10	115	14.3086	GTP hydrolysis and joining of the 60S ribosomal subunit	https://reactome.org/download/current	Rpl14 Rpsa Rps21 Rpl21 Rpl27a Rpl38 Rpl11 Rpl3 Rpl26 Rpl24
1.48088e-07	10	118	13.9448	Nonsense-Mediated Decay NMD	https://reactome.org/download/current	Rpl14 Rpsa Rps21 Rpl21 Rpl27a Rpl38 Rpl11 Rpl3 Rpl26 Rpl24
1.48088e-07	10	118	13.9448	Nonsense Mediated Decay NMD enhanced by the Exon Junction Complex EJC	https://reactome.org/download/current	Rpl14 Rpsa Rps21 Rpl21 Rpl27a Rpl38 Rpl11 Rpl3 Rpl26 Rpl24
1.59584e-07	10	122	13.4876	Eukaryotic Translation Initiation	https://reactome.org/download/current	Rpl14 Rpsa Rps21 Rpl21 Rpl27a Rpl38 Rpl11 Rpl3 Rpl26 Rpl24
1.59584e-07	10	122	13.4876	Cap-dependent Translation Initiation	https://reactome.org/download/current	Rpl14 Rpsa Rps21 Rpl21 Rpl27a Rpl38 Rpl11 Rpl3 Rpl26 Rpl24
0.00606179	4	53	12.4188	HSP90 chaperone cycle for steroid hormone receptors SHR	https://reactome.org/download/current	Tubb2b Ar Tubb3 Tuba1a
0.0107888	4	64	10.2843	L1CAM interactions	https://reactome.org/download/current	Tubb2b Gap43 Tubb3 Tuba1a
5.18317e-06	10	181	9.0911	Major pathway of rRNA processing in the nucleolus and cytosol	https://reactome.org/download/current	Rpl14 Rpsa Rps21 Rpl21 Rpl27a Rpl38 Rpl11 Rpl3 Rpl26 Rpl24
5.18317e-06	10	181	9.0911	RRNA processing	https://reactome.org/download/current	Rpl14 Rpsa Rps21 Rpl21 Rpl27a Rpl38 Rpl11 Rpl3 Rpl26 Rpl24
5.18317e-06	10	181	9.0911	RRNA processing in the nucleus and cytosol	https://reactome.org/download/current	Rpl14 Rpsa Rps21 Rpl21 Rpl27a Rpl38 Rpl11 Rpl3 Rpl26 Rpl24
0.00160915	6	112	8.81512	Post-translational protein phosphorylation	https://reactome.org/download/current	Apoe App Chgb Cst3 Sparcl1 Vgf
0.00201701	6	118	8.36689	Regulation of Insulin-like Growth Factor IGF transport and uptake by Insulin-like Growth Factor Binding Proteins IGFBPs	https://reactome.org/download/current	Apoe App Chgb Cst3 Sparcl1 Vgf
4.66689e-05	10	232	7.09262	Translation	https://reactome.org/download/current	Rpl14 Rpsa Rps21 Rpl21 Rpl27a Rpl38 Rpl11 Rpl3 Rpl26 Rpl24
0.00611173	7	212	5.43322	Transmission across Chemical Synapses	https://reactome.org/download/current	Syn2 Gabrb1 Slc32a1 Kcnj10 Ncald Camk2d Gad1
0.0171557	6	196	5.03721	Peptide ligand-binding receptors	https://reactome.org/download/current	Pomc App Gal Pdyn Pnoc Tac1
0.0171557	7	269	4.28194	Axon guidance	https://reactome.org/download/current	Sema5a Sema6d Pik3r1 Tubb2b Gap43 Tubb3 Tuba1a
0.0163433	8	341	3.86038	Neuronal System	https://reactome.org/download/current	Syn2 Gabrb1 Slc32a1 Kcnj10 Ncald Camk2d Nrxn3 Gad1
0.0216245	10	539	3.05285	Metabolism of RNA	https://reactome.org/download/current	Rpl14 Rpsa Rps21 Rpl21 Rpl27a Rpl38 Rpl11 Rpl3 Rpl26 Rpl24
0.000235791	26	1685	2.53903	Metabolism of proteins	https://reactome.org/download/current	Apoe Ctsz Pomc Sema5a App Epas1 Rpl14 Chgb Cst3 Sparcl1 Rnf128 Rpsa Vgf Rps21 Rpl21 Tubb2b Rpl27a Ar Rpl38 Rpl11 Rpl3 Rpl26 Lsamp Tubb3 Tuba1a Rpl24

## Sheet: ShinyGo 0.75 - KEGG
Enrichment FDR	nGenes	Pathway Genes	Fold Enrichment	Pathway	URL	Genes
0.00372987	4	40	16.4549	Nicotine addiction	http://www.genome.jp/kegg-bin/show_pathway?mmu05033	Gabrg1 Gabrb1 Gabre Slc32a1
1.39547e-06	10	130	12.6576	Ribosome	http://www.genome.jp/kegg-bin/show_pathway?mmu03010	Rpl14 Rpsa Rps21 Rpl21 Rpl27a Rpl38 Rpl11 Rpl3 Rpl26 Rpl24
0.00114697	6	89	11.0932	GABAergic synapse	http://www.genome.jp/kegg-bin/show_pathway?mmu04727	Gabrg1 Gabrb1 Gabre Slc32a1 Plcl1 Gad1
0.0479923	3	54	9.1416	Mineral absorption	http://www.genome.jp/kegg-bin/show_pathway?mmu04978	Atp2b1 Mt2 Atp1a1
0.00585123	5	91	9.04115	Morphine addiction	http://www.genome.jp/kegg-bin/show_pathway?mmu05032	Gabrg1 Pde4b Gabrb1 Gabre Slc32a1
1.73289e-05	11	231	7.83566	Coronavirus disease	http://www.genome.jp/kegg-bin/show_pathway?mmu05171	Rpl14 Rpsa Rps21 Pik3r1 Rpl21 Rpl27a Rpl38 Rpl11 Rpl3 Rpl26 Rpl24
0.0140662	5	120	6.8562	Oocyte meiosis	http://www.genome.jp/kegg-bin/show_pathway?mmu04114	Ppp2r5a Ppp3ca Ar Ywhag Camk2d
0.00601548	6	146	6.76228	Retrograde endocannabinoid signaling	http://www.genome.jp/kegg-bin/show_pathway?mmu04723	Gabrg1 Gabrb1 Gabre Slc32a1 mt-Nd5 mt-Nd6
0.0409588	4	102	6.4529	Aldosterone synthesis and secretion	http://www.genome.jp/kegg-bin/show_pathway?mmu04925	Atp2b1 Pomc Atp1a1 Camk2d
0.0140662	6	181	5.45466	Axon guidance	http://www.genome.jp/kegg-bin/show_pathway?mmu04360	Sema6a Sema5a Sema6d Ppp3ca Pik3r1 Camk2d
0.00736688	7	217	5.30803	CAMP signaling pathway	http://www.genome.jp/kegg-bin/show_pathway?mmu04024	Sox9 Atp2b1 Pomc Pde4b Atp1a1 Pik3r1 Camk2d
0.00372987	10	372	4.42336	Neuroactive ligand-receptor interaction	http://www.genome.jp/kegg-bin/show_pathway?mmu04080	Gabrg1 Prlr Pomc Gal Pdyn Ghrh Gabrb1 Gabre Gpr83 Tac1
0.017219	7	262	4.39634	Parkinson disease	http://www.genome.jp/kegg-bin/show_pathway?mmu05012	Snca Tubb2b Camk2d Tubb3 mt-Nd5 mt-Nd6 Tuba1a
0.00372987	10	380	4.33023	Alzheimer disease	http://www.genome.jp/kegg-bin/show_pathway?mmu05010	Apoe App Snca Ppp3ca Pik3r1 Tubb2b Tubb3 mt-Nd5 mt-Nd6 Tuba1a
0.0174485	7	266	4.33023	Prion disease	http://www.genome.jp/kegg-bin/show_pathway?mmu05020	Ppp3ca Pik3r1 Tubb2b Tubb3 mt-Nd5 mt-Nd6 Tuba1a
0.00399652	11	469	3.85936	Pathways of neurodegeneration	http://www.genome.jp/kegg-bin/show_pathway?mmu05022	Gpx3 App Snca Pdyn Ppp3ca Tubb2b Camk2d Tubb3 mt-Nd5 mt-Nd6 Tuba1a
0.0301909	7	300	3.83947	Huntington disease	http://www.genome.jp/kegg-bin/show_pathway?mmu05016	Gpx3 Kcnj10 Tubb2b Tubb3 mt-Nd5 mt-Nd6 Tuba1a
0.0236557	8	365	3.60655	Amyotrophic lateral sclerosis	http://www.genome.jp/kegg-bin/show_pathway?mmu05014	Gpx3 Ppp3ca Tubb2b Chchd10 Tubb3 mt-Nd5 mt-Nd6 Tuba1a
