# Supplementary material for: Cell-specific transcriptome changes in the hypothalamic arcuate nucleus in a mouse deoxycorticosterone acetate-salt model of hypertension
Source: Front Cell Neurosci. 2023 May 24;17:1207350. doi: 10.3389/fncel.2023.1207350 (PMC10244568; doi:10.3389/fncel.2023.1207350)
Supplement: Supplementary file 14 [file Data_Sheet_14.XLSX]

## Sheet: ShinyGo 0.75 - GO Bio Process
Table S19 - N_SC9 Agrp.Npy DOCA DEGs Enrichment Results
Enrichment FDR	nGenes	Pathway Genes	Fold Enrichment	Pathway	URL	Genes
0.000145133	6	62	17.7975	Regulation of catecholamine secretion	http://amigo.geneontology.org/amigo/term/GO:0050433	Cartpt Snca Oprk1 Oxt Npy2r Agt
0.000110127	12	366	6.02976	Hormone transport	http://amigo.geneontology.org/amigo/term/GO:0009914	Pomc Cartpt Oprk1 Ptprn Glul Acvr1c Agt Cplx1 Vgf Slc7a5 Camk2n1 Vsnl1
6.53242e-05	15	553	4.98845	Signal release	http://amigo.geneontology.org/amigo/term/GO:0023061	Pomc Cartpt Snca Oprk1 Ptprn Glul Acvr1c Oxt Npy2r Agt Cspg5 Cplx1 Vgf Camk2n1 Vsnl1
6.24911e-05	17	707	4.42211	Trans-synaptic signaling	http://amigo.geneontology.org/amigo/term/GO:0099537	Gabra1 Cartpt Fam107a Snca Glul Oxt Pdyn Npy2r Gabre Gabrq Agt Cadm1 Cspg5 Cplx1 Vgf Slc24a2 Plcb4
6.24911e-05	17	710	4.40342	Cytokine production	http://amigo.geneontology.org/amigo/term/GO:0001816	Ndrg2 Pomc Erbin Bsg Aqp4 Itgb8 Itgav Pde4b Rnf128 Adgrg1 Cadm1 Slc7a5 Mbp Tril Fzd5 Cyp2j6 B2m
8.56962e-05	17	738	4.23635	Synaptic signaling	http://amigo.geneontology.org/amigo/term/GO:0099536	Gabra1 Cartpt Fam107a Snca Glul Oxt Pdyn Npy2r Gabre Gabrq Agt Cadm1 Cspg5 Cplx1 Vgf Slc24a2 Plcb4
0.000153906	16	699	4.20962	Anterograde trans-synaptic signaling	http://amigo.geneontology.org/amigo/term/GO:0098916	Gabra1 Cartpt Fam107a Snca Glul Oxt Pdyn Npy2r Gabre Gabrq Agt Cspg5 Cplx1 Vgf Slc24a2 Plcb4
0.000153906	16	699	4.20962	Chemical synaptic transmission	http://amigo.geneontology.org/amigo/term/GO:0007268	Gabra1 Cartpt Fam107a Snca Glul Oxt Pdyn Npy2r Gabre Gabrq Agt Cspg5 Cplx1 Vgf Slc24a2 Plcb4
0.000154404	16	703	4.18566	Regulation of cytokine production	http://amigo.geneontology.org/amigo/term/GO:0001817	Ndrg2 Pomc Erbin Bsg Aqp4 Itgb8 Itgav Pde4b Rnf128 Cadm1 Slc7a5 Mbp Tril Fzd5 Cyp2j6 B2m
5.81035e-06	23	1032	4.09872	Negative regulation of multicellular organismal process	http://amigo.geneontology.org/amigo/term/GO:0051241	Ndrg2 Atp1a2 Sparc Id2 Pomc Id4 Ptch1 Cartpt Erbin Aqp4 Oprk1 Acvr1c Frzb Oxt Npy2r Pde4b Tmem176b Tsc22d3 Rnf128 Agt Thy1 Bcl2 B2m
6.26187e-08	31	1496	3.81092	Cell-cell signaling	http://amigo.geneontology.org/amigo/term/GO:0007267	Ndrg2 Gabra1 Wif1 Pomc Cartpt Fam107a Snca Oprk1 Ptprn Glul Acvr1c Frzb Oxt Pdyn Npy2r Plpp3 Gabre Gabrq Agt Thy1 Cadm1 Cspg5 Cplx1 Vgf Slc24a2 Rbms3 Plcb4 Fzd5 Camk2n1 Vsnl1 Ccnd1
0.000154404	18	887	3.73206	Tube morphogenesis	http://amigo.geneontology.org/amigo/term/GO:0035239	Sparc Id2 Ptch1 Bsg Itgb8 Glul Itgav Adgrg1 Agt Thy1 Tgfbi Asb4 S100a1 Fzd5 S1pr1 Cited1 Bcl2 Qk
4.43582e-05	24	1322	3.33872	Negative regulation of cell communication	http://amigo.geneontology.org/amigo/term/GO:0010648	Ndrg2 Rfx4 Timp3 Wif1 Ptch1 Cartpt Erbin Snca Oprk1 Rgs5 Acvr1c Frzb Itgav Npy2r Pde4b Agt Thy1 Slc24a2 Rbms3 Dmd Camk2n1 Cyp2j6 Vsnl1 Bcl2
4.43582e-05	24	1325	3.33116	Negative regulation of signaling	http://amigo.geneontology.org/amigo/term/GO:0023057	Ndrg2 Rfx4 Timp3 Wif1 Ptch1 Cartpt Erbin Snca Oprk1 Rgs5 Acvr1c Frzb Itgav Npy2r Pde4b Agt Thy1 Slc24a2 Rbms3 Dmd Camk2n1 Cyp2j6 Vsnl1 Bcl2
0.000100697	22	1222	3.31094	Chemical homeostasis	http://amigo.geneontology.org/amigo/term/GO:0048878	Atp1a2 Pomc Ptch1 Cartpt Aqp4 Snca Oprk1 Soat1 Itgav Oxt Npy2r Mt1 Agt Thy1 Vgf Slc24a2 S1pr1 Dmd Camk2n1 Vsnl1 Bcl2 B2m
5.63945e-05	26	1564	3.05729	Ion transport	http://amigo.geneontology.org/amigo/term/GO:0006811	Atp1a2 Gabra1 Snca Oprk1 Itgav Oxt Nkain4 Npy2r Pde4b Ttyh1 Slc7a10 Gabre Gabrq Agt Thy1 Kcnk9 Slc24a2 Ctss Plcb4 Slc7a5 S100a1 Dmd Kcnq3 Bcl2 B2m mt-Atp8
1.63139e-05	30	1841	2.99686	Regulation of transport	http://amigo.geneontology.org/amigo/term/GO:0051049	Ppp1cc Atp1a2 Pomc Ptch1 Cartpt Bsg Snca Oprk1 Glul Acvr1c Itgav Oxt Nkain4 Npy2r Pde4b Agt Thy1 Cspg5 Myo6 Cplx1 Ctss Plcb4 S100a1 Dmd Camk2n1 Chchd10 Vsnl1 Kcnq3 Bcl2 B2m
2.80892e-05	29	1787	2.98451	Homeostatic process	http://amigo.geneontology.org/amigo/term/GO:0042592	Atp1a2 Id2 Pomc Ptch1 Cartpt Bsg Aqp4 Snca Oprk1 Soat1 Itgav Oxt Npy2r Pde4b Tsc22d3 Mt1 Adgrg1 Agt Thy1 Vgf Slc24a2 Ctss Mbp S1pr1 Dmd Camk2n1 Vsnl1 Bcl2 B2m
4.00003e-08	43	2713	2.91486	Regulation of multicellular organismal process	http://amigo.geneontology.org/amigo/term/GO:0051239	Ppp1cc Ndrg2 Atp1a2 Sparc Id2 Pomc Id4 Ptch1 Cartpt Otp Erbin Bsg Aqp4 Itgb8 Oprk1 Glul Acvr1c Frzb Itgav Oxt Npy2r Plpp3 Pde4b Tmem176b Tsc22d3 Rnf128 Agt Thy1 Cadm1 Ctss Slc7a5 Mbp Tril S100a1 Fzd5 S1pr1 Dmd Cited1 Cyp2j6 Bcl2 B2m Qk Ccnd1
0.000136769	27	1798	2.76168	Response to oxygen-containing compound	http://amigo.geneontology.org/amigo/term/GO:1901700	Agrp Atp1a2 Sparc Ptch1 Erbin Bsg Aqp4 Snca Oprk1 Ptprn Glul Acvr1c Itgav Oxt Pde4b Mt1 Agt Rorb Vgf Dmd Camk2n1 Cited1 Vsnl1 Irs4 Bcl2 B2m Ccnd1
1.26558e-10	56	3751	2.74562	Regulation of biological quality	http://amigo.geneontology.org/amigo/term/GO:0065008	Gna12 Atp1a2 Gabra1 Entpd2 Sparc Epb41l2 Id2 Pomc Ptch1 Cartpt Erbin Fam107a Bsg Aqp4 Snca Oprk1 Ptprn Glul Soat1 Acvr1c Itgav Oxt Npy2r Plpp3 Pde4b Sparcl1 Gabre Gabrq Tsc22d3 Rnf128 Mt1 Adgrg1 Agt Thy1 Cspg5 Cplx1 Lars2 Kcnk9 Vgf Slc24a2 Ctss Slc7a5 Mbp S1pr1 Dmd Camk2n1 Chchd10 Vsnl1 Kcnq3 Bcl2 B2m Qk Ddo Gpr88 Ccnd1 Tuba1a
3.70743e-05	34	2409	2.59562	Nervous system development	http://amigo.geneontology.org/amigo/term/GO:0007399	Ppp1cc Ndrg2 Atp1a2 Gabra1 Rfx4 Id2 Id4 Ptch1 Otp Bsg Snca Acvr1c Oxt Plpp3 Auts2 Adgrg1 Agt Thy1 Cadm1 Cspg5 Mobp Rorb Mmd2 Mbp Fzd5 S1pr1 Dmd Gap43 Bcl11b Cited1 Bcl2 Ntm B2m Qk
1.02545e-05	39	2821	2.5425	Regulation of localization	http://amigo.geneontology.org/amigo/term/GO:0032879	Gna12 Ppp1cc Atp1a2 Sparc Epb41l2 Pomc Ptch1 Cartpt Fam107a Bsg Snca Oprk1 Glul Ppp2r5a Acvr1c Itgav Oxt Nkain4 Npy2r Plpp3 Pde4b Adgrg1 Agt Thy1 Cspg5 Myo6 Cplx1 Ctss Mmd2 Plcb4 S100a1 S1pr1 Dmd Camk2n1 Chchd10 Vsnl1 Kcnq3 Bcl2 B2m
0.000104363	35	2728	2.35952	Response to external stimulus	http://amigo.geneontology.org/amigo/term/GO:0009605	Ppp1cc Atp1a2 Sparc Id2 Pomc Ptch1 Cartpt Erbin Fam107a Bsg Aqp4 Itgb8 Snca Oprk1 Glul Acvr1c Itgav Oxt Pde4b Auts2 Agt Cadm1 Vgf Ctss Tril Fzd5 S1pr1 Dmd Gap43 Bcl11b Cited1 Bcl2 B2m Gpr88 Ccnd1
0.000154404	34	2685	2.32881	Anatomical structure morphogenesis	http://amigo.geneontology.org/amigo/term/GO:0009653	Gna12 Sparc Epb41l2 Rfx4 Id2 Id4 Ptch1 Bsg Itgb8 Glul Frzb Itgav Npy2r Plpp3 Auts2 Adgrg1 Agt Thy1 Cadm1 Cspg5 Mobp Tgfbi Rorb Mbp Asb4 S100a1 Fzd5 S1pr1 Dmd Gap43 Bcl11b Cited1 Bcl2 Qk
7.44995e-05	39	3183	2.25334	Regulation of cell communication	http://amigo.geneontology.org/amigo/term/GO:0010646	Gna12 Ndrg2 Rfx4 Timp3 Wif1 Pomc Ptch1 Cartpt Erbin Fam107a Snca Oprk1 Glul Rgs5 Acvr1c Frzb Itgav Oxt Npy2r Plpp3 Pde4b Auts2 Adgrg1 Agt Thy1 Cspg5 Cplx1 Vgf Slc24a2 Mmd2 Rbms3 Plcb4 Fzd5 Dmd Camk2n1 Rell1 Cyp2j6 Vsnl1 Bcl2
7.72383e-05	39	3194	2.24558	Regulation of signaling	http://amigo.geneontology.org/amigo/term/GO:0023051	Gna12 Ndrg2 Rfx4 Timp3 Wif1 Pomc Ptch1 Cartpt Erbin Fam107a Snca Oprk1 Glul Rgs5 Acvr1c Frzb Itgav Oxt Npy2r Plpp3 Pde4b Auts2 Adgrg1 Agt Thy1 Cspg5 Cplx1 Vgf Slc24a2 Mmd2 Rbms3 Plcb4 Fzd5 Dmd Camk2n1 Rell1 Cyp2j6 Vsnl1 Bcl2
1.49367e-05	50	4348	2.11485	Transport	http://amigo.geneontology.org/amigo/term/GO:0006810	Gm2a Ppp1cc Atp1a2 Gabra1 Pomc Ptch1 Cartpt Erbin Bsg Aqp4 Snca Oprk1 Ptprn Glul Soat1 Acvr1c Itgav Oxt Nkain4 Npy2r Plpp3 Pde4b Ttyh1 Slc7a10 Gabre Gabrq Agt Thy1 Cspg5 Myo6 Cplx1 Kcnk9 Vgf Slc24a2 Ctss Plcb4 Slc7a5 Elmo1 S100a1 Dmd Camk2n1 Chchd10 Cited1 Vsnl1 Kcnq3 Bcl2 B2m Qk mt-Atp8 Ccnd1
3.22945e-05	50	4504	2.0416	Establishment of localization	http://amigo.geneontology.org/amigo/term/GO:0051234	Gm2a Ppp1cc Atp1a2 Gabra1 Pomc Ptch1 Cartpt Erbin Bsg Aqp4 Snca Oprk1 Ptprn Glul Soat1 Acvr1c Itgav Oxt Nkain4 Npy2r Plpp3 Pde4b Ttyh1 Slc7a10 Gabre Gabrq Agt Thy1 Cspg5 Myo6 Cplx1 Kcnk9 Vgf Slc24a2 Ctss Plcb4 Slc7a5 Elmo1 S100a1 Dmd Camk2n1 Chchd10 Cited1 Vsnl1 Kcnq3 Bcl2 B2m Qk mt-Atp8 Ccnd1
5.56684e-05	52	4926	1.94137	Negative regulation of cellular process	http://amigo.geneontology.org/amigo/term/GO:0048523	Gna12 Ndrg2 Atp1a2 Sparc Rfx4 Timp3 Wif1 Id2 Id4 Ptch1 Cartpt Otp Erbin Fam107a Aqp4 Snca Oprk1 Ptma Ppp2r5a Rgs5 Acvr1c Frzb Itgav Npy2r Plpp3 Pde4b Tmem176b Tsc22d3 Mt1 Adgrg1 Agt Thy1 Ccp110 Rorb Slc24a2 Rbms3 Mbp S100a1 Fzd5 S1pr1 Dmd Camk2n1 Bcl11b Cited1 Cyp2j6 Vsnl1 Bcl2 Ntm B2m Qk Tubb4a Ccnd1

## Sheet: ShinyGo 0.75 - GO Molec Funct
Enrichment FDR	nGenes	Pathway Genes	Fold Enrichment	Pathway	URL	Genes
0.00836843	2	4	91.9538	Type 1 melanocortin receptor binding	http://amigo.geneontology.org/amigo/term/GO:0070996	Agrp Pomc
0.00881093	2	5	73.563	Melanocortin receptor binding	http://amigo.geneontology.org/amigo/term/GO:0031779	Agrp Pomc
0.00881093	2	5	73.563	Type 3 melanocortin receptor binding	http://amigo.geneontology.org/amigo/term/GO:0031781	Agrp Pomc
0.00881093	2	5	73.563	Type 4 melanocortin receptor binding	http://amigo.geneontology.org/amigo/term/GO:0031782	Agrp Pomc
0.0117061	2	6	61.3025	Extracellular matrix protein binding	http://amigo.geneontology.org/amigo/term/GO:1990430	Itgb8 Itgav
0.0264427	2	10	36.7815	Structural constituent of myelin sheath	http://amigo.geneontology.org/amigo/term/GO:0019911	Mobp Mbp
0.0285007	2	11	33.4377	Benzodiazepine receptor activity	http://amigo.geneontology.org/amigo/term/GO:0008503	Gabra1 Gabre
0.00769694	3	19	29.038	GABA-A receptor activity	http://amigo.geneontology.org/amigo/term/GO:0004890	Gabra1 Gabre Gabrq
0.00183469	4	26	28.2935	Neuropeptide hormone activity	http://amigo.geneontology.org/amigo/term/GO:0005184	Agrp Cartpt Oxt Vgf
0.035624	2	13	28.2935	GABA-gated chloride ion channel activity	http://amigo.geneontology.org/amigo/term/GO:0022851	Gabra1 Gabre
0.00836843	3	22	25.0783	GABA receptor activity	http://amigo.geneontology.org/amigo/term/GO:0016917	Gabra1 Gabre Gabrq
0.0117061	3	27	20.4342	Wnt-protein binding	http://amigo.geneontology.org/amigo/term/GO:0017147	Wif1 Frzb Fzd5
0.000320154	6	57	19.3587	Extracellular matrix binding	http://amigo.geneontology.org/amigo/term/GO:0050840	Sparc Itgav Sparcl1 Adgrg1 Tgfbi Ctss
0.00387534	5	70	13.1363	Collagen binding	http://amigo.geneontology.org/amigo/term/GO:0005518	Sparc Sparcl1 Adgrg1 Tgfbi Ctss
0.0173575	4	75	9.8084	Chloride channel activity	http://amigo.geneontology.org/amigo/term/GO:0005254	Gabra1 Ttyh1 Gabre Gabrq
0.0264427	4	87	8.45552	Anion channel activity	http://amigo.geneontology.org/amigo/term/GO:0005253	Gabra1 Ttyh1 Gabre Gabrq
0.00592608	6	132	8.35943	Integrin binding	http://amigo.geneontology.org/amigo/term/GO:0005178	Itgb8 Itgav Plpp3 Thy1 Tgfbi Dmd
0.00592608	6	132	8.35943	Hormone activity	http://amigo.geneontology.org/amigo/term/GO:0005179	Agrp Pomc Cartpt Oxt Agt Vgf
0.00744601	8	272	5.40905	Cell adhesion molecule binding	http://amigo.geneontology.org/amigo/term/GO:0050839	Bsg Itgb8 Itgav Plpp3 Thy1 Cadm1 Tgfbi Dmd
0.0264427	7	303	4.24869	G protein-coupled receptor binding	http://amigo.geneontology.org/amigo/term/GO:0001664	Gna12 Agrp Pomc Ptch1 Oxt Agt S1pr1
0.00836843	10	463	3.97209	Channel activity	http://amigo.geneontology.org/amigo/term/GO:0015267	Gabra1 Aqp4 Itgav Ttyh1 Gabre Gabrq Kcnk9 Slc24a2 Kcnq3 Bcl2
0.00836843	10	463	3.97209	Passive transmembrane transporter activity	http://amigo.geneontology.org/amigo/term/GO:0022803	Gabra1 Aqp4 Itgav Ttyh1 Gabre Gabrq Kcnk9 Slc24a2 Kcnq3 Bcl2
0.0345275	7	326	3.94894	Gated channel activity	http://amigo.geneontology.org/amigo/term/GO:0022836	Gabra1 Itgav Ttyh1 Gabre Gabrq Kcnk9 Kcnq3
0.0345275	8	418	3.51976	Ion channel activity	http://amigo.geneontology.org/amigo/term/GO:0005216	Gabra1 Itgav Ttyh1 Gabre Gabrq Kcnk9 Slc24a2 Kcnq3
0.0131682	11	612	3.30553	Structural molecule activity	http://amigo.geneontology.org/amigo/term/GO:0005198	Sparc Epb41l2 Mobp Tgfbi Mbp Dmd Rpl32 Rps12 Tubb4a Rps28 Tuba1a
0.0285007	11	703	2.87764	Inorganic molecular entity transmembrane transporter activity	http://amigo.geneontology.org/amigo/term/GO:0015318	Atp1a2 Gabra1 Aqp4 Itgav Ttyh1 Gabre Gabrq Kcnk9 Slc24a2 Kcnq3 mt-Atp8
0.00183469	22	1457	2.77692	Protein-containing complex binding	http://amigo.geneontology.org/amigo/term/GO:0044877	Gna12 Ppp1cc Sparc Epb41l2 Ptch1 Itgb8 Snca Ptprn Acvr1c Itgav Plpp3 Sparcl1 Adgrg1 Thy1 Myo6 Tgfbi Ctss Fzd5 Dmd Irs4 Bcl2 Ccnd1
0.00215725	22	1502	2.69372	Signaling receptor binding	http://amigo.geneontology.org/amigo/term/GO:0005102	Gna12 Agrp Wif1 Pomc Ptch1 Cartpt Erbin Itgb8 Oprk1 Acvr1c Itgav Oxt Pdyn Plpp3 Agt Thy1 Cadm1 Tgfbi Vgf S1pr1 Dmd Irs4
0.0184708	15	1089	2.53316	Transmembrane transporter activity	http://amigo.geneontology.org/amigo/term/GO:0022857	Atp1a2 Gabra1 Aqp4 Itgav Ttyh1 Slc7a10 Gabre Gabrq Cplx1 Kcnk9 Slc24a2 Slc7a5 Kcnq3 Bcl2 mt-Atp8
0.0148667	16	1172	2.51068	Transporter activity	http://amigo.geneontology.org/amigo/term/GO:0005215	Gm2a Atp1a2 Gabra1 Aqp4 Itgav Ttyh1 Slc7a10 Gabre Gabrq Cplx1 Kcnk9 Slc24a2 Slc7a5 Kcnq3 Bcl2 mt-Atp8

## Sheet: ShinyGo 0.75 - KEGG
Enrichment FDR	nGenes	Pathway Genes	Fold Enrichment	Pathway	URL	Genes
0.0336008	3	40	13.7931	Nicotine addiction	http://www.genome.jp/kegg-bin/show_pathway?mmu05033	Gabra1 Gabre Gabrq
0.0448567	3	58	9.51246	Hedgehog signaling pathway	http://www.genome.jp/kegg-bin/show_pathway?mmu04340	Ptch1 Bcl2 Ccnd1
0.0336008	4	89	8.26551	GABAergic synapse	http://www.genome.jp/kegg-bin/show_pathway?mmu04727	Gabra1 Glul Gabre Gabrq
0.0336008	4	91	8.08385	Morphine addiction	http://www.genome.jp/kegg-bin/show_pathway?mmu05032	Gabra1 Pde4b Gabre Gabrq
0.0336008	4	91	8.08385	Hypertrophic cardiomyopathy	http://www.genome.jp/kegg-bin/show_pathway?mmu05410	Itgb8 Itgav Agt Dmd
0.0340766	4	94	7.82585	Dilated cardiomyopathy	http://www.genome.jp/kegg-bin/show_pathway?mmu05414	Itgb8 Itgav Agt Dmd
0.0336008	5	122	7.5372	Sphingolipid signaling pathway	http://www.genome.jp/kegg-bin/show_pathway?mmu04071	Gna12 Ppp2r5a Plcb4 S1pr1 Bcl2
0.0342966	4	101	7.28347	AGE-RAGE signaling pathway in diabetic complications	http://www.genome.jp/kegg-bin/show_pathway?mmu04933	Agt Plcb4 Bcl2 Ccnd1
0.0342966	4	102	7.21206	Aldosterone synthesis and secretion	http://www.genome.jp/kegg-bin/show_pathway?mmu04925	Pomc Agt Kcnk9 Plcb4
0.0353139	4	108	6.81139	Parathyroid hormone synthesis, secretion and action	http://www.genome.jp/kegg-bin/show_pathway?mmu04928	Gna12 Pde4b Plcb4 Bcl2
0.0336008	5	149	6.17139	Adrenergic signaling in cardiomyocytes	http://www.genome.jp/kegg-bin/show_pathway?mmu04261	Ppp1cc Ppp2r5a Agt Plcb4 Bcl2
0.0342966	5	162	5.67616	Cushing syndrome	http://www.genome.jp/kegg-bin/show_pathway?mmu04934	Pomc Agt Plcb4 Fzd5 Ccnd1
0.0336008	6	201	5.48978	Proteoglycans in cancer	http://www.genome.jp/kegg-bin/show_pathway?mmu05205	Ppp1cc Timp3 Ptch1 Itgav Fzd5 Ccnd1
0.0342966	5	171	5.37741	CGMP-PKG signaling pathway	http://www.genome.jp/kegg-bin/show_pathway?mmu04022	Gna12 Ppp1cc Atp1a2 Plcb4 Irs4
0.0336008	6	217	5.085	CAMP signaling pathway	http://www.genome.jp/kegg-bin/show_pathway?mmu04024	Ppp1cc Atp1a2 Pomc Ptch1 Oxt Pde4b
0.0071987	10	372	4.94375	Neuroactive ligand-receptor interaction	http://www.genome.jp/kegg-bin/show_pathway?mmu04080	Gabra1 Pomc Oprk1 Oxt Pdyn Npy2r Gabre Gabrq Agt S1pr1
0.0469306	5	200	4.59769	Focal adhesion	http://www.genome.jp/kegg-bin/show_pathway?mmu04510	Ppp1cc Itgb8 Itgav Bcl2 Ccnd1
0.0469306	7	380	3.38777	Alzheimer disease	http://www.genome.jp/kegg-bin/show_pathway?mmu05010	Snca Plcb4 Fzd5 Irs4 Tubb4a mt-Atp8 Tuba1a
0.0450998	8	469	3.13702	Pathways of neurodegeneration	http://www.genome.jp/kegg-bin/show_pathway?mmu05022	Snca Pdyn Plcb4 Fzd5 Bcl2 Tubb4a mt-Atp8 Tuba1a
0.0353139	9	542	3.05382	Pathways in cancer	http://www.genome.jp/kegg-bin/show_pathway?mmu05200	Gna12 Ptch1 Itgav Agt Plcb4 Fzd5 Bcl2 Gstm1 Ccnd1

## Sheet: ShinyGo 0.75 - Reactome
Enrichment FDR	nGenes	Pathway Genes	Fold Enrichment	Pathway	URL	Genes
0.038015	3	24	22.9884	Basigin interactions	https://reactome.org/download/current	Bsg Slc7a10 Slc7a5
0.038015	4	64	11.4942	L1CAM interactions	https://reactome.org/download/current	Itgav Gap43 Tubb4a Tuba1a
0.038015	4	72	10.2171	Opioid Signalling	https://reactome.org/download/current	Pomc Pdyn Pde4b Plcb4
0.038015	6	196	5.62982	Peptide ligand-binding receptors	https://reactome.org/download/current	Pomc Oprk1 Oxt Pdyn Npy2r Agt
0.038015	9	376	4.40204	G alpha i signalling events	https://reactome.org/download/current	Pomc Oprk1 Rgs5 Pdyn Npy2r Pde4b Agt Plcb4 S1pr1
0.038015	8	341	4.31455	Neuronal System	https://reactome.org/download/current	Gabra1 Epb41l2 Glul Gabrq Myo6 Cplx1 Kcnk9 Kcnq3
