# Supplementary material for: Cell-specific transcriptome changes in the hypothalamic arcuate nucleus in a mouse deoxycorticosterone acetate-salt model of hypertension
Source: Front Cell Neurosci. 2023 May 24;17:1207350. doi: 10.3389/fncel.2023.1207350 (PMC10244568; doi:10.3389/fncel.2023.1207350)
Supplement: Supplementary file 15 [file Data_Sheet_15.XLSX]

## Sheet: Table S20 Microglia Compare DEG
	p_val	avg_log2FC	Percent Expression in C23	Percent Expression in C25	p_val_adj	Cluster Enrichment
Hexb	1.15e-67	-1.27174	0.757	0.989	2.3e-64	C25
C1qb	1.19e-65	-1.1719	0.662	0.995	2.39e-62	C25
Cst3	7.62e-68	-1.07258	0.991	1	1.52e-64	C25
Ctsd	5.73e-56	-1.06121	0.865	1	1.15e-52	C25
Siglech	8.22e-70	-1.01773	0.556	0.968	1.64e-66	C25
Hpgds	4.99e-70	-1.01187	0.598	0.971	9.97e-67	C25
C1qc	2.58e-64	-1.0065	0.565	0.981	5.17e-61	C25
P2ry12	2.73e-60	-0.975184	0.645	0.96	5.45e-57	C25
Csf1r	1.32e-53	-0.955922	0.611	0.965	2.64e-50	C25
Ly86	1.16e-46	-0.925803	0.558	0.885	2.32e-43	C25
Ctss	2e-45	-0.90629	0.556	0.936	4e-42	C25
Fcrls	2.01e-52	-0.881105	0.634	0.971	4.01e-49	C25
Laptm5	4.32e-42	-0.870617	0.704	0.971	8.65e-39	C25
C1qa	6.75e-35	-0.847951	0.576	0.781	1.35e-31	C25
Unc93b1	1.34e-57	-0.839939	0.459	0.917	2.68e-54	C25
Lpcat2	2.02e-73	-0.806008	0.512	0.952	4.03e-70	C25
Tgfbr1	6.18e-30	-0.733975	0.647	0.867	1.24e-26	C25
Inpp5d	7.75e-51	-0.716283	0.57	0.92	1.55e-47	C25
Selplg	7.31e-32	-0.712924	0.51	0.861	1.46e-28	C25
Arhgap45	1.14e-44	-0.686597	0.567	0.939	2.27e-41	C25
Fyb	8.85e-54	-0.684035	0.563	0.939	1.77e-50	C25
Epb41l2	5.21e-31	-0.680049	0.585	0.877	1.04e-27	C25
Cx3cr1	6.2e-28	-0.655242	0.711	0.917	1.24e-24	C25
Abi3	4.88e-68	-0.621682	0.455	0.92	9.77e-65	C25
Dock10	3.29e-37	-0.613135	0.525	0.893	6.58e-34	C25
Olfml3	1.45e-36	-0.600017	0.446	0.845	2.89e-33	C25
Apbb1ip	1.23e-51	-0.598089	0.488	0.923	2.46e-48	C25
Mafb	8.18e-28	-0.547917	0.499	0.771	1.64e-24	C25
Itgb5	4.42e-33	-0.543603	0.532	0.88	8.84e-30	C25
Cyth4	1.02e-27	-0.531555	0.528	0.837	2.04e-24	C25
Itgam	1.34e-29	-0.523315	0.415	0.768	2.67e-26	C25
B2m	1.91e-37	-0.520246	0.481	0.883	3.82e-34	C25
Ptprc	2.94e-44	-0.507026	0.539	0.931	5.89e-41	C25
Selenop	1.23e-41	-0.502758	0.461	0.896	2.46e-38	C25
Lair1	8.32e-21	-0.501981	0.62	0.869	1.66e-17	C25
Ctsc	4.52e-71	-0.497938	0.362	0.925	9.04e-68	C25
Il10ra	1.54e-49	-0.488203	0.472	0.899	3.08e-46	C25
Fcer1g	8.43e-32	-0.485494	0.252	0.659	1.69e-28	C25
Fgd2	2.02e-50	-0.479638	0.453	0.92	4.05e-47	C25
Irf8	3.02e-44	-0.479582	0.404	0.867	6.04e-41	C25
Trem2	1.04e-14	-0.478731	0.435	0.592	2.08e-11	C25
Rps3a1	4.47e-19	-0.47787	0.857	0.979	8.93e-16	C25
Zfp36l1	3.23e-55	-0.473441	0.351	0.864	6.45e-52	C25
Tmem119	3.2e-14	-0.465475	0.371	0.528	6.41e-11	C25
Mpeg1	1.91e-19	-0.465181	0.514	0.773	3.82e-16	C25
Plxdc2	3.57e-30	-0.462307	0.547	0.896	7.14e-27	C25
Sall1	6.03e-40	-0.439901	0.444	0.867	1.21e-36	C25
Il6ra	5.01e-33	-0.43772	0.536	0.867	1e-29	C25
Pou2f2	2.2e-17	-0.431482	0.594	0.824	4.4e-14	C25
H2-K1	6.35e-42	-0.424106	0.525	0.912	1.27e-38	C25
Itga6	6.37e-35	-0.423985	0.508	0.885	1.27e-31	C25
Fcgr3	3.99e-73	-0.421288	0.344	0.928	7.98e-70	C25
Mertk	8.06e-35	-0.414688	0.605	0.928	1.61e-31	C25
Bin2	2.89e-87	-0.413514	0.26	0.912	5.77e-84	C25
Tsc22d4	2.97e-44	-0.411913	0.417	0.877	5.94e-41	C25
Zfhx3	1.21e-18	-0.405267	0.596	0.872	2.42e-15	C25
Gpr34	8.52e-29	-0.405155	0.4	0.776	1.7e-25	C25
Itpr2	7.57e-48	-0.403647	0.475	0.907	1.51e-44	C25
Ighm	3.4e-66	-0.402708	0.366	0.915	6.8e-63	C25
Aif1	5.19e-48	-0.39954	0.47	0.915	1.04e-44	C25
Txnip	1.64e-41	-0.399252	0.514	0.909	3.28e-38	C25
Cd37	6.71e-30	-0.396847	0.415	0.792	1.34e-26	C25
Ifngr1	1.11e-33	-0.394303	0.481	0.867	2.22e-30	C25
Marcks	3.08e-11	-0.392754	0.77	0.923	6.16e-08	C25
AU020206	1.27e-52	-0.384207	0.461	0.931	2.55e-49	C25
Slc29a3	4.26e-32	-0.383094	0.486	0.856	8.52e-29	C25
Pld4	3.76e-14	-0.382111	0.514	0.571	7.52e-11	C25
Chd7	2.14e-35	-0.376085	0.481	0.853	4.28e-32	C25
Tmsb4x	2.99e-10	-0.374435	0.974	0.987	5.98e-07	C25
Ctsz	1.37e-07	-0.371478	0.415	0.592	0.000274787	C25
Pros1	7e-47	-0.353696	0.497	0.909	1.4e-43	C25
Prkcd	8.45e-46	-0.349961	0.477	0.915	1.69e-42	C25
Cmtm7	1.12e-36	-0.3488	0.561	0.912	2.25e-33	C25
Lat2	2.09e-49	-0.346968	0.492	0.904	4.19e-46	C25
Macf1	7.79e-07	-0.344938	0.918	0.952	0.0015583	C25
Rgs2	8.24e-22	-0.338944	0.583	0.877	1.65e-18	C25
Maf	7.43e-12	-0.332503	0.347	0.589	1.49e-08	C25
Nckap1l	1.2e-28	-0.331195	0.371	0.744	2.4e-25	C25
Tgfb1	2.22e-54	-0.327983	0.276	0.803	4.43e-51	C25
Slc16a6	3.22e-18	-0.321491	0.45	0.709	6.43e-15	C25
Prex1	3.45e-42	-0.319525	0.366	0.829	6.89e-39	C25
Qk	1.31e-12	-0.318223	0.611	0.84	2.61e-09	C25
Vsir	1.12e-09	-0.316004	0.609	0.704	2.25e-06	C25
Klf3	1.26e-47	-0.315335	0.389	0.869	2.52e-44	C25
Runx1	4.62e-51	-0.315062	0.426	0.901	9.24e-48	C25
Wls	1.3e-44	-0.305316	0.494	0.896	2.6e-41	C25
Csf2rb	6e-53	-0.302117	0.45	0.907	1.2e-49	C25
Cd34	1.8e-68	-0.301509	0.289	0.869	3.6e-65	C25
Kctd12	1.85e-13	-0.300959	0.49	0.739	3.7e-10	C25
Cfh	1.67e-32	-0.298545	0.294	0.709	3.35e-29	C25
Crybb1	3.98e-54	-0.2958	0.406	0.901	7.95e-51	C25
Rasal3	8.31e-53	-0.294817	0.194	0.717	1.66e-49	C25
H2-D1	8.37e-54	-0.292697	0.415	0.912	1.67e-50	C25
Fermt3	4.39e-49	-0.28775	0.446	0.904	8.78e-46	C25
Mef2c	1.09e-05	-0.286937	0.687	0.797	0.0217654	C25
Csf3r	5.64e-11	-0.286865	0.49	0.683	1.13e-07	C25
Trim30a	4.75e-55	-0.285019	0.444	0.899	9.5e-52	C25
Zeb2	1.37e-06	-0.279432	0.55	0.699	0.00273124	C25
Camk2d	4.75e-20	-0.278675	0.636	0.907	9.5e-17	C25
Adora3	5.22e-57	-0.278617	0.411	0.907	1.04e-53	C25
Bst2	3.1e-62	-0.277337	0.384	0.904	6.21e-59	C25
Arhgap25	2.52e-66	-0.27472	0.351	0.896	5.03e-63	C25
Pmp22	6.66e-51	-0.274493	0.439	0.899	1.33e-47	C25
Cd63	1.97e-21	-0.272425	0.419	0.752	3.93e-18	C25
Ptgs1	1.94e-08	-0.26872	0.636	0.765	3.87e-05	C25
Pycard	2.04e-14	-0.26841	0.442	0.648	4.08e-11	C25
P2rx7	2.99e-75	-0.26834	0.3	0.904	5.98e-72	C25
Nfe2l2	1.83e-88	-0.267732	0.223	0.888	3.66e-85	C25
Rps21	3e-08	-0.267337	0.943	0.989	6.01e-05	C25
Slco2b1	5.77e-09	-0.26635	0.481	0.496	1.15e-05	C25
Rpl23	5.26e-06	-0.263717	0.94	0.981	0.0105188	C25
I830077J02Rik	7.16e-45	-0.262917	0.481	0.891	1.43e-41	C25
Ltc4s	1.29e-09	-0.258007	0.307	0.52	2.58e-06	C25
Lyn	3.93e-25	-0.253819	0.422	0.773	7.85e-22	C25
Hk2	2.88e-12	-0.251884	0.488	0.685	5.77e-09	C25
Gpm6b	7.34e-07	0.253992	0.611	0.427	0.00146788	C23
Bex2	6.62e-14	0.254828	0.925	0.971	1.32e-10	C23
Arhgap6	6.38e-41	0.256929	0.572	0.144	1.28e-37	C23
Rpsa	3.28e-10	0.260638	0.976	0.989	6.56e-07	C23
Map2	3.98e-11	0.263243	0.958	0.989	7.95e-08	C23
Rtn1	6.66e-09	0.264021	0.962	0.976	1.33e-05	C23
Lrp1b	3.85e-16	0.264588	0.483	0.224	7.7e-13	C23
Slc17a6	6.74e-07	0.264663	0.572	0.421	0.00134823	C23
Scn9a	3.4e-15	0.266853	0.558	0.283	6.8e-12	C23
Zdbf2	6e-14	0.268135	0.627	0.36	1.2e-10	C23
Atp1b1	3.02e-08	0.268504	0.965	0.981	6.04e-05	C23
Slc4a4	5.76e-13	0.272136	0.556	0.304	1.15e-09	C23
Tac1	1.44e-15	0.273065	0.669	0.819	2.87e-12	C23
Tuba1a	1.3e-13	0.27462	0.839	0.883	2.61e-10	C23
Opcml	1.36e-07	0.274954	0.404	0.245	0.000271617	C23
Pam	1.3e-14	0.275608	0.66	0.763	2.6e-11	C23
Syt11	1.32e-07	0.276627	0.956	0.944	0.000263905	C23
Ywhag	2.1e-14	0.283661	0.876	0.907	4.2e-11	C23
Gria3	4.84e-11	0.284375	0.625	0.627	9.69e-08	C23
Gm3764	9.43e-15	0.289647	0.503	0.235	1.89e-11	C23
Bcan	3.39e-07	0.29019	0.556	0.368	0.000677878	C23
Ptprd	1.58e-10	0.293932	0.55	0.352	3.17e-07	C23
Stmn1	8.1e-17	0.297398	0.777	0.837	1.62e-13	C23
Calb1	1.23e-05	0.298045	0.45	0.291	0.0245353	C23
Pcsk2	7.66e-14	0.298068	0.444	0.205	1.53e-10	C23
mt-Co1	8.28e-09	0.300595	1	1	1.66e-05	C23
Clu	1.61e-15	0.302369	0.68	0.749	3.21e-12	C23
Nfasc	4.89e-20	0.304249	0.497	0.192	9.79e-17	C23
Rps12	5.33e-13	0.310867	0.823	0.819	1.07e-09	C23
Celf4	6.06e-07	0.312438	0.947	0.915	0.00121162	C23
Rab3c	1.14e-08	0.314895	0.845	0.765	2.27e-05	C23
Tubb4a	5.52e-12	0.316345	0.497	0.264	1.1e-08	C23
Gda	3.25e-14	0.323535	0.543	0.275	6.5e-11	C23
Zwint	7.04e-15	0.323935	0.945	0.971	1.41e-11	C23
5031439G07Rik	1.87e-23	0.324978	0.539	0.2	3.74e-20	C23
Aatk	3.96e-17	0.325136	0.51	0.227	7.92e-14	C23
Aldoc	2.62e-13	0.326407	0.66	0.683	5.25e-10	C23
Aplp1	4.94e-20	0.328235	0.766	0.792	9.88e-17	C23
Prkacb	1.66e-09	0.329965	0.925	0.896	3.32e-06	C23
Ndrg2	3.02e-09	0.330973	0.717	0.715	6.04e-06	C23
Pcdh17	8.15e-08	0.33249	0.62	0.429	0.000163055	C23
Impact	7.96e-18	0.334091	0.865	0.917	1.59e-14	C23
Kcnq1ot1	1.03e-10	0.337148	0.956	0.963	2.06e-07	C23
Gap43	5.22e-17	0.338886	0.746	0.741	1.04e-13	C23
Pcp4	1.11e-06	0.339841	0.671	0.499	0.00221494	C23
App	4.29e-13	0.340952	0.958	0.981	8.58e-10	C23
Gad2	4.1e-13	0.342813	0.583	0.664	8.2e-10	C23
Pcsk1n	5.47e-13	0.35081	0.998	0.995	1.09e-09	C23
Sst	7.76e-06	0.356328	0.554	0.653	0.0155173	C23
Gabrg1	2.24e-32	0.35726	0.605	0.216	4.48e-29	C23
Ptgds	6.17e-09	0.359332	0.66	0.784	1.23e-05	C23
Ncam1	1.88e-11	0.363847	0.954	0.888	3.76e-08	C23
Elavl2	2.74e-09	0.365548	0.539	0.461	5.49e-06	C23
Miat	1.88e-29	0.366179	0.587	0.208	3.76e-26	C23
Epha5	2.65e-28	0.371108	0.625	0.243	5.29e-25	C23
Peg3	1.76e-18	0.372864	0.958	0.995	3.52e-15	C23
Ndn	1.21e-09	0.374987	0.921	0.933	2.43e-06	C23
Tmem130	6.23e-22	0.375543	0.786	0.792	1.25e-18	C23
Nrxn3	7.27e-18	0.379184	0.647	0.683	1.45e-14	C23
Hap1	1.34e-17	0.382337	0.943	0.955	2.69e-14	C23
Map1b	1.85e-13	0.389924	0.967	0.973	3.71e-10	C23
Pcdh9	8.4e-22	0.390629	0.642	0.304	1.68e-18	C23
Gaa	1.17e-18	0.392775	0.929	0.944	2.34e-15	C23
Cplx2	1.1e-38	0.393403	0.647	0.213	2.2e-35	C23
Resp18	5.06e-22	0.394182	0.678	0.715	1.01e-18	C23
C230004F18Rik	7.42e-16	0.396117	0.735	0.723	1.48e-12	C23
Sparcl1	1.71e-17	0.41532	0.735	0.789	3.43e-14	C23
Ttc3	3.02e-19	0.422143	0.993	0.997	6.03e-16	C23
Ly6h	2.43e-20	0.425942	0.956	0.979	4.86e-17	C23
Nap1l5	5.72e-21	0.4275	0.98	1	1.14e-17	C23
Syne1	3.79e-22	0.430426	0.786	0.757	7.57e-19	C23
Tubb3	1.03e-18	0.449775	0.603	0.568	2.06e-15	C23
mt-Nd1	5.92e-17	0.453034	1	1	1.18e-13	C23
Gria2	5.39e-17	0.463356	0.974	0.949	1.08e-13	C23
Cacna2d1	3.46e-18	0.464473	0.603	0.296	6.93e-15	C23
Syt4	1.38e-23	0.471229	0.779	0.757	2.76e-20	C23
Pcdh7	8.68e-34	0.471779	0.687	0.264	1.74e-30	C23
Tubb2a	7.47e-28	0.483017	0.832	0.827	1.49e-24	C23
Ahi1	6.74e-20	0.50138	0.991	0.981	1.35e-16	C23
Gabrb1	7.2e-21	0.514197	0.762	0.661	1.44e-17	C23
mt-Nd2	1.07e-22	0.521384	0.998	1	2.13e-19	C23
Mbp	1.43e-10	0.524267	0.576	0.555	2.86e-07	C23
Lsamp	2.81e-18	0.527002	0.823	0.659	5.61e-15	C23
Syn2	5.39e-38	0.53385	0.649	0.675	1.08e-34	C23
Scg2	6.92e-23	0.534152	0.85	0.824	1.38e-19	C23
Ncdn	4e-20	0.597605	0.64	0.411	8e-17	C23
Plp1	4.87e-06	0.607987	0.501	0.491	0.0097394	C23
Atp1a2	9.79e-20	0.618641	0.797	0.493	1.96e-16	C23
Snhg11	1.05e-47	1.23442	0.991	0.989	2.09e-44	C23
Meg3	1.92e-52	1.3675	0.987	1	3.83e-49	C23
