# Supplementary material for: Cell-specific transcriptome changes in the hypothalamic arcuate nucleus in a mouse deoxycorticosterone acetate-salt model of hypertension
Source: Front Cell Neurosci. 2023 May 24;17:1207350. doi: 10.3389/fncel.2023.1207350 (PMC10244568; doi:10.3389/fncel.2023.1207350)
Supplement: Supplementary file 16 [file Data_Sheet_16.XLSX]

## Sheet: GO Biological Processes
Table S21 - C23 vs C25 Enrichment Results
Enrichment FDR	nGenes	Pathway Genes	Fold Enrichment	Pathway	URL	Genes
0.000215459	5	57	22.5851	Regulation of microtubule polymerization	http://amigo.geneontology.org/amigo/term/GO:0031113	Map2 Stmn1 Map1b Gda Tubb4a
4.53831e-05	9	244	9.49687	Vesicle-mediated transport in synapse	http://amigo.geneontology.org/amigo/term/GO:0099003	Hap1 Syn2 Syt4 Cplx2 Slc17a6 Pcdh17 Nrxn3 Syt11 Syne1
1.62736e-06	14	492	7.3264	Modulation of chemical synaptic transmission	http://amigo.geneontology.org/amigo/term/GO:0050804	Hap1 App Syt4 Celf4 Cplx2 Calb1 Ptprd Ncdn Pcdh17 Ywhag Map1b Tac1 Nrxn3 Syne1
1.62736e-06	14	493	7.31154	Regulation of trans-synaptic signaling	http://amigo.geneontology.org/amigo/term/GO:0099177	Hap1 App Syt4 Celf4 Cplx2 Calb1 Ptprd Ncdn Pcdh17 Ywhag Map1b Tac1 Nrxn3 Syne1
3.21351e-05	12	472	6.54586	Synapse organization	http://amigo.geneontology.org/amigo/term/GO:0050808	Ndrg2 Bcan App Nfasc Ptprd Epha5 Sparcl1 Pcdh17 Gap43 Map1b Nrxn3 Tuba1a
0.000111667	11	449	6.30774	Regulation of membrane potential	http://amigo.geneontology.org/amigo/term/GO:0042391	Gabrg1 Gria3 App Celf4 Atp1b1 Gabrb1 Cacna2d1 Slc4a4 Tac1 Scn9a Syne1
4.34018e-07	18	738	6.27977	Synaptic signaling	http://amigo.geneontology.org/amigo/term/GO:0099536	Gabrg1 Hap1 Syn2 Ly6h App Syt4 Celf4 Cplx2 Calb1 Ptprd Ncdn Gabrb1 Pcdh17 Ywhag Map1b Tac1 Nrxn3 Syne1
7.1229e-07	17	699	6.2618	Anterograde trans-synaptic signaling	http://amigo.geneontology.org/amigo/term/GO:0098916	Gabrg1 Hap1 Syn2 App Syt4 Celf4 Cplx2 Calb1 Ptprd Ncdn Gabrb1 Pcdh17 Ywhag Map1b Tac1 Nrxn3 Syne1
7.1229e-07	17	699	6.2618	Chemical synaptic transmission	http://amigo.geneontology.org/amigo/term/GO:0007268	Gabrg1 Hap1 Syn2 App Syt4 Celf4 Cplx2 Calb1 Ptprd Ncdn Gabrb1 Pcdh17 Ywhag Map1b Tac1 Nrxn3 Syne1
7.1229e-07	17	707	6.19095	Trans-synaptic signaling	http://amigo.geneontology.org/amigo/term/GO:0099537	Gabrg1 Hap1 Syn2 App Syt4 Celf4 Cplx2 Calb1 Ptprd Ncdn Gabrb1 Pcdh17 Ywhag Map1b Tac1 Nrxn3 Syne1
5.98712e-06	15	656	5.88728	Neuron projection morphogenesis	http://amigo.geneontology.org/amigo/term/GO:0048812	Bcan Map2 Clu App Syt4 Impact Nfasc Ptprd Stmn1 Epha5 Ndn Gap43 Map1b Tubb3 Syne1
6.45309e-06	15	670	5.76427	Plasma membrane bounded cell projection morphogenesis	http://amigo.geneontology.org/amigo/term/GO:0120039	Bcan Map2 Clu App Syt4 Impact Nfasc Ptprd Stmn1 Epha5 Ndn Gap43 Map1b Tubb3 Syne1
6.53103e-06	15	675	5.72157	Cell projection morphogenesis	http://amigo.geneontology.org/amigo/term/GO:0048858	Bcan Map2 Clu App Syt4 Impact Nfasc Ptprd Stmn1 Epha5 Ndn Gap43 Map1b Tubb3 Syne1
1.06388e-05	15	704	5.48588	Cell part morphogenesis	http://amigo.geneontology.org/amigo/term/GO:0032990	Bcan Map2 Clu App Syt4 Impact Nfasc Ptprd Stmn1 Epha5 Ndn Gap43 Map1b Tubb3 Syne1
8.44189e-05	14	739	4.87766	Cell junction organization	http://amigo.geneontology.org/amigo/term/GO:0034330	Ndrg2 Bcan App Nfasc Ptprd Epha5 Sparcl1 Gpm6b Arhgap6 Pcdh17 Gap43 Map1b Nrxn3 Tuba1a
3.91145e-05	15	792	4.87634	Cellular component morphogenesis	http://amigo.geneontology.org/amigo/term/GO:0032989	Bcan Map2 Clu App Syt4 Impact Nfasc Ptprd Stmn1 Epha5 Ndn Gap43 Map1b Tubb3 Syne1
1.21098e-06	20	1064	4.83967	Neuron projection development	http://amigo.geneontology.org/amigo/term/GO:0031175	Bcan Hap1 Map2 Clu App Syt4 Impact Nfasc Ptprd Stmn1 Ncdn Epha5 Gpm6b Plp1 Ndn Gap43 Map1b Tubb3 Pcp4 Syne1
1.50141e-06	21	1206	4.48332	Neuron development	http://amigo.geneontology.org/amigo/term/GO:0048666	Bcan Hap1 Map2 Clu App Syt4 Impact Nfasc Ptprd Stmn1 Ncdn Gabrb1 Epha5 Gpm6b Plp1 Ndn Gap43 Map1b Tubb3 Pcp4 Syne1
1.82599e-05	18	1083	4.27929	Regulation of organelle organization	http://amigo.geneontology.org/amigo/term/GO:0033043	Hap1 Map2 Zwint Syt4 Cplx2 Pam Ptprd Stmn1 Epha5 Gpm6b Arhgap6 Gap43 Map1b Gda Tac1 Tubb4a Syt11 Syne1
0.000155741	15	905	4.26747	Export from cell	http://amigo.geneontology.org/amigo/term/GO:0140352	Hap1 Atp1a2 Syn2 Ptgds Rab3c Syt4 Cplx2 Pam Atp1b1 Epha5 Slc4a4 Tac1 Nrxn3 Syt11 Pcp4
7.91195e-05	16	966	4.26452	Regulation of cellular component biogenesis	http://amigo.geneontology.org/amigo/term/GO:0044087	Hap1 Map2 Clu App Impact Ptprd Stmn1 Gpm6b Arhgap6 Gap43 Map1b Gda Tac1 Tubb4a Syt11 Syne1
1.74327e-06	23	1496	3.95844	Cell-cell signaling	http://amigo.geneontology.org/amigo/term/GO:0007267	Gabrg1 Ndrg2 Hap1 Syn2 Ly6h App Syt4 Celf4 Cplx2 Calb1 Ptprd Ncdn Gabrb1 Epha5 Pcdh17 Cacna2d1 Ywhag Map1b Tac1 Nrxn3 Syt11 Pcp4 Syne1
5.91713e-06	22	1470	3.8533	Neuron differentiation	http://amigo.geneontology.org/amigo/term/GO:0030182	Bcan Hap1 Map2 Clu App Syt4 Impact Nfasc Ptprd Stmn1 Ncdn Gabrb1 Epha5 Gpm6b Plp1 Ndn Gap43 Ywhag Map1b Tubb3 Pcp4 Syne1
6.41893e-06	23	1627	3.63972	Generation of neurons	http://amigo.geneontology.org/amigo/term/GO:0048699	Bcan Hap1 Map2 Clu App Syt4 Impact Nfasc Ptprd Stmn1 Ncdn Gabrb1 Epha5 Gpm6b Plp1 Ndn Gap43 Ywhag Map1b Tubb2a Tubb3 Pcp4 Syne1
1.02679e-08	34	2409	3.63387	Nervous system development	http://amigo.geneontology.org/amigo/term/GO:0007399	Ndrg2 Bcan Prkacb Hap1 Atp1a2 Map2 Clu App Syt4 Impact Cplx2 Pam Nfasc Pcsk2 Ptprd Stmn1 Ncdn Gabrb1 Epha5 Gpm6b Plp1 Ndn Pcdh17 Mbp Gap43 Ywhag Map1b Pcdh9 Tubb2a Tubb3 mt-Co1 Nrxn3 Pcp4 Syne1
4.3348e-05	21	1570	3.44387	Cell projection organization	http://amigo.geneontology.org/amigo/term/GO:0030030	Bcan Hap1 Map2 Clu App Syt4 Impact Nfasc Ptprd Stmn1 Ncdn Epha5 Gpm6b Plp1 Ndn Gap43 Map1b Tubb3 Tubb4a Pcp4 Syne1
0.000106777	20	1531	3.36343	Plasma membrane bounded cell projection organization	http://amigo.geneontology.org/amigo/term/GO:0120036	Bcan Hap1 Map2 Clu App Syt4 Impact Nfasc Ptprd Stmn1 Ncdn Epha5 Gpm6b Plp1 Ndn Gap43 Map1b Tubb3 Pcp4 Syne1
1.93685e-05	23	1765	3.35514	Neurogenesis	http://amigo.geneontology.org/amigo/term/GO:0022008	Bcan Hap1 Map2 Clu App Syt4 Impact Nfasc Ptprd Stmn1 Ncdn Gabrb1 Epha5 Gpm6b Plp1 Ndn Gap43 Ywhag Map1b Tubb2a Tubb3 Pcp4 Syne1
6.45309e-06	36	3751	2.47106	Regulation of biological quality	http://amigo.geneontology.org/amigo/term/GO:0065008	Gabrg1 Gria3 Hap1 Atp1a2 Syn2 Map2 Clu App Syt4 Celf4 Gaa Cplx2 Pam Atp1b1 Gad2 Pcsk2 Calb1 Ptprd Stmn1 Ncdn Gabrb1 Epha5 Sparcl1 Gpm6b Ndn Pcsk1n Cacna2d1 Mbp Ywhag Map1b Slc4a4 Tac1 Nrxn3 Tuba1a Scn9a Syne1
0.000214115	38	4822	2.02901	System development	http://amigo.geneontology.org/amigo/term/GO:0048731	Ndrg2 Bcan Prkacb Hap1 Atp1a2 Map2 Clu App Syt4 Celf4 Impact Gaa Cplx2 Pam Nfasc Pcsk2 Calb1 Ptprd Stmn1 Ncdn Gabrb1 Epha5 Gpm6b Plp1 Ndn Pcdh17 Mbp Gap43 Scg2 Ywhag Map1b Pcdh9 Tubb2a Tubb3 mt-Co1 Nrxn3 Pcp4 Syne1

## Sheet: GO Molecular Functions
Enrichment FDR	nGenes	Pathway Genes	Fold Enrichment	Pathway	URL	Genes
0.00672386	2	3	171.647	Cytoskeletal regulatory protein binding	http://amigo.geneontology.org/amigo/term/GO:0005519	Map2 Map1b
0.0152813	2	9	57.2157	P-type sodium:potassium-exchanging transporter activity	http://amigo.geneontology.org/amigo/term/GO:0005391	Atp1a2 Atp1b1
0.0152813	2	9	57.2157	P-type sodium transporter activity	http://amigo.geneontology.org/amigo/term/GO:0008554	Atp1a2 Atp1b1
0.0164827	2	10	51.4941	Structural constituent of myelin sheath	http://amigo.geneontology.org/amigo/term/GO:0019911	Plp1 Mbp
0.0169162	2	11	46.8128	P-type potassium transmembrane transporter activity	http://amigo.geneontology.org/amigo/term/GO:0008556	Atp1a2 Atp1b1
0.0169162	2	11	46.8128	Sodium ion binding	http://amigo.geneontology.org/amigo/term/GO:0031402	Atp1a2 Scn9a
0.0189029	2	13	39.6109	GABA-gated chloride ion channel activity	http://amigo.geneontology.org/amigo/term/GO:0022851	Gabrg1 Gabrb1
0.0230642	2	16	32.1838	GABA receptor binding	http://amigo.geneontology.org/amigo/term/GO:0050811	Gabrg1 Gabrb1
0.00672386	4	58	17.7566	Transmitter-gated ion channel activity	http://amigo.geneontology.org/amigo/term/GO:0022824	Gabrg1 Gria3 Gabrb1 Gria2
0.00672386	4	58	17.7566	Transmitter-gated channel activity	http://amigo.geneontology.org/amigo/term/GO:0022835	Gabrg1 Gria3 Gabrb1 Gria2
0.0169162	3	49	15.7635	Transmitter-gated ion channel activity involved in regulation of postsynaptic membrane potential	http://amigo.geneontology.org/amigo/term/GO:1904315	Gabrg1 Gria3 Gabrb1
0.0189029	3	52	14.8541	Neurotransmitter receptor activity involved in regulation of postsynaptic membrane potential	http://amigo.geneontology.org/amigo/term/GO:0099529	Gabrg1 Gria3 Gabrb1
0.00963992	4	71	14.5054	Structural constituent of cytoskeleton	http://amigo.geneontology.org/amigo/term/GO:0005200	Tubb2a Tubb3 Tubb4a Tuba1a
0.00963992	4	71	14.5054	Extracellular ligand-gated ion channel activity	http://amigo.geneontology.org/amigo/term/GO:0005230	Gabrg1 Gria3 Gabrb1 Gria2
0.0230642	3	61	12.6625	Oxidoreduction-driven active transmembrane transporter activity	http://amigo.geneontology.org/amigo/term/GO:0015453	mt-Nd1 mt-Nd2 mt-Co1
0.0230642	3	63	12.2605	Phosphatidylserine binding	http://amigo.geneontology.org/amigo/term/GO:0001786	Syt4 Gap43 Syt11
0.0253765	3	66	11.7032	Postsynaptic neurotransmitter receptor activity	http://amigo.geneontology.org/amigo/term/GO:0098960	Gabrg1 Gria3 Gabrb1
0.0169162	4	110	9.36257	Neurotransmitter receptor activity	http://amigo.geneontology.org/amigo/term/GO:0030594	Gabrg1 Gria3 Gabrb1 Gria2
0.0230642	4	131	7.8617	Ligand-gated ion channel activity	http://amigo.geneontology.org/amigo/term/GO:0015276	Gabrg1 Gria3 Gabrb1 Gria2
0.0230642	4	134	7.68569	Ligand-gated channel activity	http://amigo.geneontology.org/amigo/term/GO:0022834	Gabrg1 Gria3 Gabrb1 Gria2
0.0230642	4	135	7.62876	Sodium ion transmembrane transporter activity	http://amigo.geneontology.org/amigo/term/GO:0015081	Atp1a2 Atp1b1 Slc4a4 Scn9a
0.0169162	5	188	6.84762	Primary active transmembrane transporter activity	http://amigo.geneontology.org/amigo/term/GO:0015399	Atp1a2 Atp1b1 mt-Nd1 mt-Nd2 mt-Co1
0.0230642	6	326	4.73872	Gated channel activity	http://amigo.geneontology.org/amigo/term/GO:0022836	Gabrg1 Gria3 Gabrb1 Gria2 Cacna2d1 Scn9a
0.00645628	12	709	4.35775	Calcium ion binding	http://amigo.geneontology.org/amigo/term/GO:0005509	Bcan Syt4 Pam Calb1 Pcdh7 Sparcl1 Pcdh17 Lrp1b Pcdh9 Tubb4a Syt11 Pcp4
0.0146834	10	703	3.66246	Inorganic molecular entity transmembrane transporter activity	http://amigo.geneontology.org/amigo/term/GO:0015318	Gabrg1 Gria3 Atp1a2 Atp1b1 Gabrb1 Gria2 Cacna2d1 Slc4a4 mt-Co1 Scn9a
0.0205434	10	821	3.13606	Ion transmembrane transporter activity	http://amigo.geneontology.org/amigo/term/GO:0015075	Gabrg1 Gria3 Atp1a2 Atp1b1 Gabrb1 Gria2 Cacna2d1 Slc4a4 mt-Co1 Scn9a
0.0146834	12	987	3.13034	Cytoskeletal protein binding	http://amigo.geneontology.org/amigo/term/GO:0008092	Hap1 Map2 Aldoc Rab3c Clu Impact Stmn1 Ndn Ywhag Map1b Syt11 Syne1
0.0123371	13	1089	3.07357	Transmembrane transporter activity	http://amigo.geneontology.org/amigo/term/GO:0022857	Gabrg1 Gria3 Atp1a2 Atp1b1 Gabrb1 Slc17a6 Gria2 Cacna2d1 Slc4a4 mt-Nd1 mt-Nd2 mt-Co1 Scn9a
0.0152813	13	1172	2.8559	Transporter activity	http://amigo.geneontology.org/amigo/term/GO:0005215	Gabrg1 Gria3 Atp1a2 Atp1b1 Gabrb1 Slc17a6 Gria2 Cacna2d1 Slc4a4 mt-Nd1 mt-Nd2 mt-Co1 Scn9a
0.00963992	16	1502	2.7427	Signaling receptor binding	http://amigo.geneontology.org/amigo/term/GO:0005102	Gabrg1 Sst Aplp1 Hap1 Clu Ly6h App Ptprd Gabrb1 Bex2 Scg2 Ywhag Tac1 Tubb3 mt-Nd2 Syne1
