# Supplementary material for: Cell-specific transcriptome changes in the hypothalamic arcuate nucleus in a mouse deoxycorticosterone acetate-salt model of hypertension
Source: Front Cell Neurosci. 2023 May 24;17:1207350. doi: 10.3389/fncel.2023.1207350 (PMC10244568; doi:10.3389/fncel.2023.1207350)
Supplement: Supplementary file 17 [file Data_Sheet_17.XLSX]

## Sheet: Cluster 0 - Snhg11.Meg3
Table S22 - DOCA DEG Results for All Analyzed Clusters
	p_val	avg_log2FC	pct.1	pct.2	p_val_adj
Hbb-bs	1.25184e-190	-0.116501	0.518	0.24	2.50369e-187
Nts	6.73391e-185	-0.209701	0.375	0.238	1.34678e-181
Pde10a	8.83815e-124	-0.119043	0.652	0.363	1.76763e-120
Plp1	2.90558e-114	-0.251073	0.274	0.682	5.81116e-111
Fstl5	2.05883e-89	-0.108997	0.617	0.369	4.11765e-86
Prlr	7.67747e-76	-0.113806	0.575	0.432	1.53549e-72
Sash1	6.38059e-75	-0.11285	0.306	0.209	1.27612e-71
Zfhx4	4.60827e-71	-0.147202	0.5	0.377	9.21654e-68
Kcnj10	2.63244e-69	-0.114695	0.402	0.316	5.26488e-66
Pmch	1.00713e-61	0.354042	0.318	0.437	2.01426e-58
Rorb	2.80299e-55	-0.127398	0.513	0.382	5.60597e-52
Cacng4	6.10644e-53	-0.100955	0.324	0.301	1.22129e-49
Sparcl1	4.90887e-52	-0.103076	0.426	0.682	9.81773e-49
Thy1	5.63042e-47	-0.147039	0.378	0.621	1.12608e-43
5031439G07Rik	3.74078e-43	-0.154609	0.534	0.797	7.48157e-40
Scn9a	1.10134e-39	-0.197393	0.729	0.621	2.20269e-36
mt-Nd4l	2.0137e-39	0.115516	0.774	0.912	4.02739e-36
Tubb2a	2.15034e-37	0.247125	0.718	0.767	4.30068e-34
Fnbp1	1.33772e-35	-0.11935	0.442	0.377	2.67543e-32
Rbfox1	7.10106e-35	-0.114213	0.4	0.388	1.42021e-31
Rasgrp1	6.02972e-33	-0.160147	0.657	0.543	1.20594e-29
Vgf	3.82793e-32	-0.14895	0.257	0.476	7.65585e-29
Rps29	4.95671e-32	0.143016	0.861	0.948	9.91342e-29
Dmd	1.89115e-31	-0.112724	0.661	0.542	3.78231e-28
Pcdh9	6.02932e-31	-0.122322	0.719	0.616	1.20586e-27
Col25a1	2.37519e-30	-0.138197	0.294	0.515	4.75038e-27
Syne1	2.8248e-30	-0.361121	0.854	0.879	5.6496e-27
Nefm	1.08719e-29	-0.104414	0.31	0.514	2.17439e-26
Rpl18a	6.34049e-28	0.209476	0.711	0.756	1.2681e-24
Auts2	3.07997e-27	-0.111309	0.617	0.538	6.15994e-24
Ecel1	3.30387e-27	-0.109467	0.658	0.545	6.60773e-24
Rps23	3.39957e-27	0.210073	0.718	0.768	6.79914e-24
Gpld1	3.53708e-27	-0.100249	0.23	0.43	7.07417e-24
Rps20	1.53204e-26	0.213646	0.756	0.808	3.06408e-23
Sst	4.65023e-26	0.118316	0.593	0.414	9.30045e-23
Serpine2	6.76705e-26	-0.1567	0.217	0.41	1.35341e-22
Rps8	8.39886e-26	0.11029	0.903	0.979	1.67977e-22
Tenm1	1.11242e-25	-0.13499	0.581	0.534	2.22484e-22
Thsd7a	1.48308e-25	-0.147521	0.413	0.393	2.96616e-22
Syt4	6.33096e-24	-0.171646	0.665	0.843	1.26619e-20
Rpl37a	4.54246e-23	0.16978	0.843	0.891	9.08491e-20
Kcnk9	5.36928e-23	-0.118974	0.24	0.416	1.07386e-19
Tubb3	1.3875e-22	0.15119	0.482	0.553	2.775e-19
Zfhx3	1.03081e-20	-0.165963	0.536	0.587	2.06162e-17
Tcf4	7.27921e-20	0.131432	0.686	0.52	1.45584e-16
Mef2c	9.51483e-20	-0.10176	0.575	0.506	1.90297e-16
Hap1	1.42468e-18	0.137612	0.926	0.976	2.84937e-15
Rps21	4.79576e-18	0.164111	0.881	0.924	9.59153e-15
Ppp1r9a	3.07437e-17	0.103889	0.767	0.639	6.14874e-14
Tshz2	1.58964e-16	-0.109442	0.371	0.444	3.17928e-13
Rpl35a	2.36928e-16	0.21204	0.927	0.933	4.73856e-13
Bex2	4.57229e-16	0.143383	0.893	0.931	9.14458e-13
Sv2c	1.80267e-15	-0.112928	0.577	0.705	3.60534e-12
Hcn1	5.10211e-15	-0.143499	0.412	0.492	1.02042e-11
Dgkk	8.11232e-15	-0.113453	0.236	0.344	1.62246e-11
Rpl27a	9.19107e-15	0.16654	0.839	0.87	1.83821e-11
Atp2b4	1.13263e-14	-0.10468	0.518	0.512	2.26527e-11
Qdpr	2.84176e-14	-0.112323	0.379	0.375	5.68351e-11
Rpl36	6.3837e-14	0.186451	0.773	0.782	1.27674e-10
Dlk1	1.14455e-13	0.125929	0.701	0.586	2.28909e-10
Rpl32	2.25731e-13	0.139745	0.717	0.745	4.51461e-10
Rps11	2.39373e-13	0.136026	0.752	0.793	4.78746e-10
Sema6d	3.27028e-13	-0.116219	0.463	0.532	6.54057e-10
Cartpt	7.76782e-13	0.126946	0.575	0.442	1.55356e-09
Ntm	9.66178e-13	-0.156869	0.639	0.716	1.93236e-09
Slc6a11	9.79464e-13	-0.126482	0.276	0.413	1.95893e-09
Sirt2	1.60868e-12	-0.115553	0.583	0.601	3.21737e-09
Pcsk2	2.00659e-12	-0.150769	0.406	0.475	4.01317e-09
Hsp90ab1	6.41531e-12	0.133259	0.939	0.98	1.28306e-08
Frmd4a	8.9292e-12	-0.15992	0.691	0.748	1.78584e-08
Msi2	1.10259e-11	-0.105959	0.708	0.679	2.20518e-08
Nell1	1.19958e-11	-0.103067	0.278	0.311	2.39917e-08
Htr2c	1.38299e-11	-0.143806	0.409	0.507	2.76597e-08
Ndn	1.79027e-11	0.135278	0.853	0.923	3.58055e-08
Rpl9	3.74656e-11	0.182912	0.932	0.924	7.49312e-08
Miat	4.11718e-11	-0.122167	0.743	0.729	8.23437e-08
Ptn	4.38659e-11	-0.122039	0.347	0.428	8.77319e-08
Pclo	4.67939e-11	-0.163778	0.854	0.886	9.35878e-08
Ly6h	4.78144e-11	0.169784	0.962	0.971	9.56289e-08
Kcnq3	6.4973e-11	-0.112211	0.686	0.776	1.29946e-07
Ptprd	9.11159e-11	-0.124529	0.561	0.58	1.82232e-07
Gpm6b	2.48254e-10	-0.110581	0.421	0.504	4.96508e-07
Rpl13	3.53801e-10	0.164433	0.966	0.974	7.07601e-07
Srrm2	7.86278e-10	-0.164236	0.96	0.973	1.57256e-06
Il1rap	2.70326e-09	-0.108603	0.574	0.576	5.40652e-06
Pgrmc1	3.80721e-09	0.136799	0.863	0.882	7.61442e-06
Cspg5	4.55137e-09	-0.135892	0.622	0.731	9.10274e-06
Pfdn5	6.17168e-09	0.157655	0.655	0.646	1.23434e-05
Syt11	1.39233e-08	0.16352	0.938	0.97	2.78465e-05
Celf4	1.80565e-08	0.110027	0.933	0.975	3.61129e-05
Rpl3	2.91531e-08	0.117264	0.869	0.89	5.83062e-05
Gabra1	5.09473e-08	-0.115403	0.435	0.548	0.000101895
Gm45159	5.25994e-08	-0.14209	0.69	0.74	0.000105199
Gapdh	1.60918e-07	0.145131	0.902	0.916	0.000321835
Slc38a2	2.46608e-07	-0.111453	0.405	0.473	0.000493216
Rpl23	1.77326e-06	0.121418	0.859	0.861	0.00354652

## Sheet: Cluster 1 - Gm42418.Rps21
	p_val	avg_log2FC	pct.1	pct.2	p_val_adj
Chga	1.07541e-175	-0.108943	0.307	0.737	2.15082e-172
Etnppl	5.13487e-162	-0.142774	0.11	0.532	1.02697e-158
Adgrg1	2.48141e-115	-0.121718	0.291	0.697	4.96281e-112
Pou2f2	4.28113e-109	-0.103622	0.482	0.285	8.56226e-106
Prlr	1.14162e-98	-0.206588	0.548	0.418	2.28324e-95
Hba-a1	5.83613e-77	-0.145649	0.262	0.225	1.16723e-73
Agrp	2.75415e-76	-0.137516	0.622	0.906	5.50829e-73
Hbb-bs	4.83589e-73	-0.222346	0.387	0.373	9.67179e-70
Ntsr2	4.60794e-70	-0.114713	0.231	0.52	9.21589e-67
Clu	1.22137e-66	0.117315	0.595	0.793	2.44273e-63
Tac1	1.48485e-66	0.289321	0.72	0.919	2.96969e-63
Mt1	1.75092e-63	-0.222617	0.478	0.76	3.50183e-60
Rnf128	1.69634e-62	-0.112279	0.61	0.876	3.39268e-59
Cacng4	2.76297e-61	-0.149854	0.466	0.379	5.52595e-58
Ogt	1.00077e-59	-0.148515	0.364	0.662	2.00155e-56
Dbi	2.26449e-57	-0.137881	0.356	0.607	4.52898e-54
Pip4k2a	2.18861e-55	-0.120487	0.238	0.515	4.37723e-52
Tsc22d4	2.91305e-55	-0.121045	0.252	0.53	5.82609e-52
S100b	5.17486e-54	-0.129552	0.424	0.397	1.03497e-50
Gad2	3.58671e-53	-0.103883	0.485	0.738	7.17342e-50
Msi2	7.57026e-53	-0.181964	0.54	0.804	1.51405e-49
Ppp1r16b	9.98295e-51	-0.137894	0.14	0.376	1.99659e-47
Syn2	1.9132e-49	0.11399	0.528	0.696	3.82639e-46
Irs4	1.17643e-46	-0.132518	0.654	0.532	2.35285e-43
Fam107a	3.65284e-46	-0.129553	0.434	0.693	7.30568e-43
Mobp	2.05966e-45	-0.187375	0.23	0.461	4.11933e-42
Agt	2.04411e-44	-0.123159	0.283	0.508	4.08823e-41
Map7	7.81646e-44	-0.135017	0.306	0.541	1.56329e-40
Ramp1	2.59507e-43	-0.126772	0.386	0.639	5.19013e-40
AY036118	3.67022e-42	-0.128121	0.459	0.394	7.34043e-39
Bcan	1.03221e-41	-0.161781	0.395	0.642	2.06443e-38
Pla2g7	7.53633e-41	-0.148042	0.23	0.463	1.50727e-37
Gda	3.07261e-40	-0.166389	0.679	0.882	6.14522e-37
Gja1	3.9825e-39	-0.112516	0.349	0.286	7.965e-36
Rps12	1.56207e-38	-0.142779	0.751	0.925	3.12415e-35
Mal	5.6906e-38	-0.130491	0.108	0.279	1.13812e-34
Plekhb1	7.28778e-38	-0.112785	0.306	0.343	1.45756e-34
Npy	9.26894e-38	-0.297123	0.614	0.625	1.85379e-34
B2m	9.49281e-38	-0.118715	0.312	0.538	1.89856e-34
Mmd2	1.06625e-37	-0.169741	0.315	0.548	2.1325e-34
Tubb2b	2.18083e-37	-0.105332	0.41	0.642	4.36166e-34
Tubb3	6.72214e-37	0.276401	0.498	0.538	1.34443e-33
Atp2b1	2.83336e-36	-0.134426	0.668	0.596	5.66672e-33
Paqr8	1.46623e-35	-0.105499	0.137	0.325	2.93245e-32
Edil3	4.32195e-35	-0.112068	0.284	0.495	8.6439e-32
Six3	9.44251e-35	-0.117384	0.349	0.332	1.8885e-31
Pmch	3.64268e-34	0.328343	0.322	0.27	7.28535e-31
Sirt2	3.68533e-33	-0.123524	0.231	0.257	7.37065e-30
Myo6	4.83649e-33	-0.161422	0.46	0.635	9.67298e-30
Pomc	6.48044e-33	-0.155471	0.63	0.52	1.29609e-29
Nts	5.41793e-32	-0.161195	0.214	0.316	1.08359e-28
S100a13	8.60559e-32	-0.117617	0.519	0.721	1.72112e-28
Rrbp1	4.5466e-31	-0.130786	0.312	0.329	9.0932e-28
Gabrq	2.66877e-30	-0.105157	0.531	0.449	5.33754e-27
Calb2	4.27565e-30	0.234476	0.436	0.517	8.5513e-27
Hlf	9.07106e-30	-0.105002	0.304	0.302	1.81421e-26
Mt2	1.92412e-29	-0.180992	0.279	0.478	3.84824e-26
Ptch1	4.77047e-29	-0.167636	0.408	0.596	9.54094e-26
Nnat	2.13964e-28	0.156639	0.907	0.978	4.27928e-25
Pbxip1	2.45868e-27	-0.115326	0.308	0.499	4.91736e-24
Adgrl2	2.97496e-27	-0.101184	0.563	0.746	5.94991e-24
Cdc37l1	3.86911e-26	-0.163025	0.28	0.459	7.73823e-23
Oxt	1.54642e-25	0.100789	0.175	0.333	3.09285e-22
Syt4	2.71489e-25	0.165802	0.765	0.849	5.42977e-22
Sorbs2	4.52719e-25	-0.133128	0.554	0.727	9.05438e-22
Scd1	2.74117e-24	-0.143585	0.192	0.313	5.48235e-21
Opcml	3.47335e-24	-0.13681	0.37	0.558	6.9467e-21
Chchd10	7.49528e-24	-0.122938	0.554	0.716	1.49906e-20
Cryab	9.13915e-24	-0.116774	0.115	0.258	1.82783e-20
Cnp	5.1387e-23	-0.115097	0.148	0.282	1.02774e-19
Timp3	1.19971e-22	-0.200298	0.352	0.468	2.39941e-19
Fnbp1	2.00576e-22	-0.112972	0.267	0.301	4.01152e-19
Clmn	2.81551e-22	-0.126472	0.506	0.506	5.63102e-19
Chpt1	5.55711e-22	-0.109309	0.463	0.445	1.11142e-18
Plpp3	1.43376e-21	-0.195106	0.504	0.551	2.86751e-18
Chl1	2.26889e-21	-0.113005	0.352	0.527	4.53778e-18
Stmn1	2.85322e-21	0.151445	0.819	0.881	5.70644e-18
Rps27	3.19299e-21	-0.169571	0.85	0.95	6.38598e-18
Gabra1	1.07979e-20	0.112265	0.34	0.417	2.15958e-17
Gabre	2.59638e-20	-0.141075	0.553	0.674	5.19276e-17
Metrn	2.91977e-20	-0.106589	0.255	0.305	5.83953e-17
Peg10	4.76616e-20	-0.129413	0.409	0.458	9.53232e-17
Bcas1	2.94048e-19	-0.100331	0.198	0.303	5.88097e-16
Scg2	3.22898e-19	0.134571	0.87	0.954	6.45796e-16
Ndrg1	6.77702e-19	-0.114406	0.299	0.434	1.3554e-15
Slc4a4	7.49842e-19	-0.156023	0.423	0.487	1.49968e-15
Nr2f2	7.62719e-19	-0.109451	0.147	0.28	1.52544e-15
Id4	5.2901e-18	-0.190605	0.582	0.635	1.05802e-14
Zfhx4	5.72024e-18	-0.129147	0.262	0.391	1.14405e-14
Rpl26	7.45779e-18	-0.164192	0.828	0.928	1.49156e-14
Klf9	1.41445e-17	-0.124715	0.587	0.574	2.8289e-14
Rorb	3.84042e-17	-0.17212	0.398	0.502	7.68084e-14
Eef1a1	2.39547e-16	-0.167599	0.997	0.999	4.79093e-13
Cdh13	7.00373e-16	-0.127888	0.201	0.299	1.40075e-12
Prdx6	1.60505e-15	-0.145649	0.593	0.592	3.2101e-12
Cacna2d1	2.10655e-15	0.185156	0.696	0.562	4.2131e-12
Sox9	2.28861e-15	-0.124248	0.29	0.362	4.57723e-12
mt-Co1	1.62404e-14	-0.116045	1	1	3.24809e-11
Apoe	1.7754e-14	-0.173455	0.941	0.986	3.5508e-11
Cst3	1.79389e-14	-0.205105	0.994	0.998	3.58779e-11
Unc5d	3.00839e-14	-0.159129	0.605	0.718	6.01679e-11
Mlc1	7.32603e-13	-0.131845	0.322	0.416	1.46521e-09
Rps3a1	1.79669e-12	0.107209	0.864	0.91	3.59337e-09
Hs6st2	2.15206e-12	-0.110983	0.456	0.577	4.30411e-09
Ncam2	7.03318e-12	-0.122819	0.619	0.623	1.40664e-08
Dgkb	1.03626e-11	-0.110326	0.568	0.584	2.07253e-08
Rgs2	1.12203e-11	-0.13733	0.588	0.662	2.24406e-08
Rpl9	2.42078e-11	-0.169385	0.987	0.994	4.84157e-08
Rgs4	3.12141e-11	-0.128468	0.497	0.565	6.24282e-08
Cd81	3.9725e-11	-0.140802	0.628	0.741	7.94499e-08
Cpe	5.44001e-11	-0.13942	0.944	0.982	1.088e-07
2900097C17Rik	7.48447e-11	0.142818	0.942	0.96	1.49689e-07
Slc17a6	9.12939e-11	0.103242	0.566	0.464	1.82588e-07
Cd63	1.14237e-10	-0.117163	0.339	0.438	2.28473e-07
Srrm2	1.28545e-10	-0.102813	0.907	0.892	2.5709e-07
Rplp1	1.45212e-10	-0.109059	0.993	0.999	2.90424e-07
Nrgn	1.75086e-10	-0.172054	0.601	0.634	3.50172e-07
Rpl32	2.44587e-10	-0.107259	0.863	0.935	4.89174e-07
Atp1b1	4.72315e-10	0.215161	0.994	0.991	9.44631e-07
mt-Nd5	1.2053e-08	-0.105557	0.981	0.996	2.4106e-05
Rpl27a	5.69638e-08	-0.120076	0.948	0.978	0.000113928
Map1b	1.46739e-07	0.178812	0.99	0.99	0.000293478
Tubb2a	4.43935e-07	0.122724	0.856	0.847	0.000887871
Pfdn5	7.46535e-07	-0.100741	0.717	0.795	0.00149307
Maged1	7.73891e-07	0.121788	0.969	0.978	0.00154778
Rps24	3.99805e-06	-0.105698	0.997	0.998	0.0079961
Prkacb	4.86872e-06	0.103003	0.93	0.955	0.00973744
Hsp90aa1	4.91862e-06	0.11106	0.992	1	0.00983724
Ahi1	1.85896e-05	0.140915	0.991	0.998	0.0371792
Zbtb20	2.32576e-05	-0.109512	0.943	0.942	0.0465152

## Sheet: Cluster 2 - GABAergic neurons
	p_val	avg_log2FC	pct.1	pct.2	p_val_adj
Vip	6.34399e-260	-0.248887	0.796	0.241	1.2688e-256
Trpm3	2.49608e-176	-0.11024	0.597	0.221	4.99215e-173
Irs4	7.04782e-165	-0.108432	0.897	0.471	1.40956e-161
Foxg1	7.90243e-140	-0.167036	0.83	0.498	1.58049e-136
Pou2f2	1.3009e-116	-0.247054	0.738	0.487	2.6018e-113
Nts	7.5809e-92	-0.341808	0.403	0.335	1.51618e-88
Dmd	1.98181e-88	-0.155958	0.935	0.663	3.96362e-85
Reln	2.6193e-87	-0.129595	0.743	0.42	5.2386e-84
Ecel1	4.86722e-87	-0.10499	0.882	0.545	9.73444e-84
C1ql3	1.48373e-86	-0.133666	0.392	0.243	2.96747e-83
Rorb	9.36105e-85	-0.110193	0.756	0.438	1.87221e-81
Ttn	4.07332e-83	-0.326077	0.873	0.56	8.14664e-80
Sema6d	2.62728e-77	-0.179247	0.867	0.618	5.25455e-74
Nos1	4.24522e-77	-0.107345	0.767	0.458	8.49043e-74
Foxn3	2.85699e-74	-0.100053	0.743	0.46	5.71398e-71
Fat3	4.56585e-73	-0.10811	0.908	0.638	9.1317e-70
Utp14b	4.15503e-71	-0.105987	0.702	0.438	8.31007e-68
Rasgrp1	7.19919e-70	-0.182648	0.919	0.674	1.43984e-66
Adarb2	2.14487e-68	-0.23395	0.869	0.621	4.28974e-65
Nfib	3.58708e-65	-0.20247	0.874	0.634	7.17417e-62
4930447C04Rik	4.81185e-65	-0.151616	0.711	0.487	9.6237e-62
Lmo4	5.59628e-64	-0.102446	0.839	0.571	1.11926e-60
Prlr	7.37095e-63	-0.288233	0.701	0.571	1.47419e-59
Fnbp1	8.10263e-56	-0.107688	0.661	0.458	1.62053e-52
Sst	5.1006e-53	0.104509	0.913	0.625	1.02012e-49
Pex5l	4.24797e-50	-0.132045	0.779	0.569	8.49595e-47
Gm45159	1.27242e-48	-0.158168	0.86	0.656	2.54485e-45
Rgs4	6.71372e-48	-0.106771	0.894	0.67	1.34274e-44
Spon1	7.11149e-46	-0.10451	0.667	0.413	1.4223e-42
Frmd4a	2.92017e-45	-0.151467	0.918	0.754	5.84035e-42
C130073E24Rik	5.94535e-45	-0.123456	0.897	0.696	1.18907e-41
Ntng1	7.19769e-45	-0.297734	0.917	0.806	1.43954e-41
Plekhb1	9.94369e-45	-0.125723	0.454	0.35	1.98874e-41
Ptprz1	1.40664e-41	-0.134005	0.883	0.703	2.81327e-38
Syne1	1.32109e-40	-0.201598	0.97	0.846	2.64218e-37
Dpp10	1.31103e-39	-0.10463	0.806	0.603	2.62205e-36
Car10	1.04801e-35	-0.12899	0.829	0.665	2.09602e-32
Zbtb20	1.22892e-34	-0.141422	0.974	0.846	2.45785e-31
Sema6a	6.29245e-33	-0.118905	0.703	0.562	1.25849e-29
Ncam2	7.09156e-32	-0.105172	0.626	0.513	1.41831e-28
Gabrq	7.82188e-31	-0.129431	0.863	0.696	1.56438e-27
Thsd7a	1.33323e-28	-0.141434	0.462	0.42	2.66645e-25
Fstl5	2.84666e-27	-0.10071	0.888	0.732	5.69331e-24
Auts2	3.41815e-27	-0.170303	0.818	0.701	6.8363e-24
Dgkk	1.69806e-26	-0.153824	0.374	0.406	3.39613e-23
Col11a1	4.2439e-25	-0.103176	0.702	0.496	8.4878e-22
Ccp110	9.05245e-25	-0.107677	0.403	0.373	1.81049e-21
Zeb2	2.61365e-24	-0.100305	0.434	0.317	5.22729e-21
Nefm	1.18866e-23	-0.19258	0.768	0.676	2.37731e-20
Plxdc2	4.39029e-23	-0.120211	0.508	0.475	8.78058e-20
Mef2c	7.96376e-23	-0.111577	0.932	0.806	1.59275e-19
Aplp1	4.59967e-22	0.198466	0.787	0.864	9.19934e-19
Son	7.55601e-22	-0.119552	0.969	0.891	1.5112e-18
Abca2	1.80608e-18	-0.12925	0.594	0.808	3.61216e-15
Meis2	2.798e-18	0.123111	0.904	0.996	5.596e-15
Pmch	1.60043e-17	0.483877	0.419	0.272	3.20085e-14
Tnr	4.27304e-17	-0.120699	0.709	0.629	8.54608e-14
Kcnk9	9.1027e-17	-0.196347	0.305	0.513	1.82054e-13
Satb1	1.22697e-16	-0.107836	0.766	0.663	2.45393e-13
Zic1	1.78036e-16	-0.17857	0.546	0.536	3.56072e-13
Snhg11	4.46759e-15	-0.158858	1	1	8.93518e-12
Zfhx3	6.57907e-15	-0.145995	0.528	0.725	1.31581e-11
Mal	2.15616e-14	-0.108045	0.39	0.44	4.31232e-11
Rmst	4.83945e-14	-0.203221	0.442	0.511	9.67889e-11
Dlk1	9.0278e-14	-0.214104	0.645	0.6	1.80556e-10
Qk	1.17844e-13	-0.125206	0.337	0.527	2.35688e-10
Rpl37a	1.20424e-13	0.223471	0.868	0.882	2.40847e-10
Grik1	2.74536e-13	-0.128277	0.915	0.828	5.49072e-10
AC149090.1	3.13866e-13	-0.127289	0.981	0.938	6.27732e-10
Egr1	6.8994e-13	-0.130554	0.514	0.688	1.37988e-09
Miat	9.66242e-13	-0.128138	0.846	0.786	1.93248e-09
Gpld1	1.26701e-12	-0.126069	0.252	0.426	2.53402e-09
Hcn1	8.97701e-12	-0.140822	0.291	0.42	1.7954e-08
Macf1	9.40924e-12	-0.10416	0.977	0.929	1.88185e-08
Ptprd	9.94991e-12	-0.10468	0.792	0.73	1.98998e-08
Rps29	1.6439e-11	0.166679	0.887	0.933	3.28781e-08
Vsnl1	3.86249e-11	0.175088	0.719	0.741	7.72499e-08
Unc5d	6.44495e-11	-0.115494	0.916	0.85	1.28899e-07
Ar	8.82622e-11	-0.140797	0.517	0.518	1.76524e-07
2021-09-04	1.2214e-10	-0.105788	0.739	0.701	2.44279e-07
Ptprt	6.41832e-10	-0.115199	0.463	0.464	1.28366e-06
Tshz2	6.68273e-10	-0.104053	0.489	0.585	1.33655e-06
Mt1	1.2415e-09	0.128448	0.435	0.489	2.483e-06
Plcb4	1.32164e-09	-0.106942	0.621	0.629	2.64327e-06
Penk	1.40734e-09	-0.323681	0.691	0.688	2.81469e-06
Prdx6	1.84577e-09	-0.114044	0.53	0.536	3.69154e-06
Gap43	1.84862e-09	0.154393	0.818	0.879	3.69723e-06
Sulf2	1.86613e-09	-0.110819	0.83	0.788	3.73225e-06
Rps21	2.28415e-09	0.15585	0.859	0.906	4.56829e-06
Syn2	4.39217e-09	0.171068	0.84	0.855	8.78434e-06
Rps14	5.35835e-09	0.122028	0.753	0.795	1.07167e-05
Ppp1r16b	1.63735e-08	-0.111675	0.519	0.589	3.27471e-05
Epha4	1.96292e-08	-0.13583	0.664	0.681	3.92584e-05
Foxp2	2.40052e-08	-0.112029	0.841	0.915	4.80105e-05
Plp1	3.22294e-08	-0.135384	0.455	0.596	6.44588e-05
Serpine2	4.51473e-08	-0.120958	0.56	0.549	9.02947e-05
Rps20	6.24318e-08	0.170907	0.828	0.821	0.000124864
Psap	6.77331e-08	0.213141	0.97	0.973	0.000135466
Opcml	1.16582e-07	-0.124641	0.886	0.83	0.000233164
Tubb3	1.2158e-07	0.143415	0.823	0.857	0.00024316
Htr2c	1.63561e-07	-0.11985	0.792	0.732	0.000327121
Camkv	2.561e-07	-0.100832	0.634	0.754	0.0005122
Celf2	3.17601e-07	-0.106152	0.956	0.92	0.000635202
Rpl18a	4.30017e-07	0.187004	0.822	0.792	0.000860033
Zdbf2	4.43676e-07	-0.115591	0.741	0.754	0.000887351
Ckb	6.20474e-07	0.191185	0.926	0.915	0.00124095
mt-Co1	7.32962e-07	0.131433	1	1	0.00146592
mt-Nd1	7.89546e-07	0.169019	0.987	0.993	0.00157909
5031439G07Rik	1.18384e-06	-0.116046	0.547	0.676	0.00236769
Josd2	1.33653e-06	-0.107307	0.551	0.665	0.00267305
mt-Nd2	1.75075e-06	0.182	0.99	1	0.0035015
Slc32a1	1.86793e-06	0.145652	0.8	0.806	0.00373587
Bex2	2.05565e-06	0.102048	0.932	0.967	0.0041113
Rps23	3.15768e-06	0.140438	0.768	0.783	0.00631535
Hsp90aa1	4.41192e-06	0.108587	0.983	1	0.00882383
Meg3	6.03545e-06	-0.116368	1	1	0.0120709
Chchd10	6.36225e-06	0.115867	0.774	0.761	0.0127245
Nrgn	1.38547e-05	0.13067	0.606	0.498	0.0277095

## Sheet: Cluster 3 - Gm42418.Rps12
	p_val	avg_log2FC	pct.1	pct.2	p_val_adj
Hba-a1	6.02168e-302	-0.136763	0.61	0.149	1.20434e-298
Slc17a6	3.3826e-245	0.146903	0.765	0.221	6.76519e-242
Prlr	3.77116e-208	-0.161988	0.763	0.324	7.54233e-205
Cacng4	8.0376e-191	-0.108546	0.57	0.186	1.60752e-187
Npy	1.1775e-184	-0.226287	0.789	0.378	2.35499e-181
Lypd1	6.17928e-183	-0.13411	0.161	0.681	1.23586e-179
Ogt	8.37395e-142	-0.139312	0.431	0.892	1.67479e-138
Ncald	8.63119e-129	-0.151224	0.495	0.91	1.72624e-125
Hbb-bs	1.27038e-115	-0.167877	0.402	0.231	2.54075e-112
Rps28	2.56226e-110	0.231793	0.754	0.98	5.12453e-107
Tead1	1.49331e-95	-0.1019	0.509	0.217	2.98663e-92
Pcp4	3.97002e-95	0.167001	0.566	0.876	7.94004e-92
Slc24a2	3.32092e-90	-0.167207	0.206	0.576	6.64184e-87
C230004F18Rik	6.27756e-80	0.107545	0.914	0.656	1.25551e-76
Ddhd1	5.48642e-78	-0.10081	0.379	0.742	1.09728e-74
Ppp1r16b	1.58124e-75	-0.11067	0.139	0.456	3.16249e-72
Dmd	1.07271e-70	-0.206003	0.301	0.645	2.14543e-67
Tubb3	9.41556e-69	0.104423	0.723	0.458	1.88311e-65
Cplx2	1.18535e-64	-0.151181	0.626	0.909	2.3707e-61
Pcdh9	1.42934e-64	-0.128439	0.723	0.461	2.85867e-61
Gad1	3.54498e-64	0.156364	0.55	0.275	7.08996e-61
Adgrg1	2.74075e-63	-0.129072	0.705	0.947	5.48149e-60
Marcks	4.52056e-61	0.112572	0.755	0.932	9.04112e-58
Slc1a3	7.60005e-60	-0.11174	0.498	0.335	1.52001e-56
Tnr	4.02897e-56	-0.107547	0.498	0.29	8.05794e-53
Clu	4.47789e-56	0.101949	0.778	0.952	8.95578e-53
Pmch	2.89482e-55	0.353425	0.451	0.351	5.78965e-52
Gabra1	5.17215e-54	-0.172976	0.211	0.418	1.03443e-50
Six3	2.95666e-51	-0.133746	0.69	0.476	5.91332e-48
Zfhx3	1.08238e-47	-0.180778	0.39	0.402	2.16477e-44
Scn9a	1.47483e-44	-0.212398	0.638	0.503	2.94966e-41
Lmo4	3.11727e-40	-0.13674	0.744	0.931	6.23454e-37
Asb4	5.67652e-40	-0.132755	0.702	0.515	1.1353e-36
Chpt1	1.60208e-39	-0.107793	0.608	0.414	3.20416e-36
Chchd10	5.2122e-39	-0.290624	0.783	0.957	1.04244e-35
Atp1a2	1.30436e-37	0.109289	0.828	0.974	2.60872e-34
Peg10	8.98701e-35	-0.145684	0.272	0.214	1.7974e-31
Zdbf2	9.67796e-35	-0.219005	0.541	0.645	1.93559e-31
Msi2	2.71791e-34	-0.120454	0.778	0.946	5.43583e-31
Camk2d	1.44509e-33	-0.12099	0.594	0.814	2.89018e-30
Sorbs2	2.11799e-33	-0.158795	0.639	0.843	4.23599e-30
Isl1	1.28842e-31	-0.104746	0.585	0.794	2.57683e-28
Itih3	4.79883e-31	-0.104686	0.22	0.419	9.59767e-28
Rorb	4.99527e-31	-0.143527	0.291	0.219	9.99054e-28
Tpt1	6.43392e-31	-0.20272	0.813	0.952	1.28678e-27
Adgrl2	1.16059e-30	-0.111819	0.77	0.926	2.32118e-27
Ptgds	6.81345e-29	0.113899	0.573	0.764	1.36269e-25
Mef2c	1.58761e-27	-0.139292	0.78	0.922	3.17523e-24
Parm1	4.48106e-27	-0.113187	0.785	0.933	8.96213e-24
mt-Atp8	4.82123e-27	0.131448	0.812	0.66	9.64246e-24
Dpp10	6.07985e-21	-0.1051	0.19	0.353	1.21597e-17
Rpl24	7.33654e-21	-0.261044	0.997	0.996	1.46731e-17
Nfib	1.47067e-20	-0.16147	0.601	0.751	2.94135e-17
Timp3	3.78794e-18	-0.117995	0.55	0.451	7.57588e-15
Ctsd	1.39978e-17	0.105688	0.681	0.523	2.79957e-14
Pcsk2	4.94376e-17	-0.181392	0.476	0.421	9.88753e-14
Mobp	5.50927e-16	-0.344231	0.144	0.27	1.10185e-12
Basp1	1.35255e-12	0.156498	0.99	0.996	2.7051e-09
Calb1	1.83257e-12	-0.131023	0.256	0.38	3.66514e-09
Gnas	2.50733e-12	0.212989	0.999	1	5.01466e-09
4930447C04Rik	1.57653e-11	-0.102949	0.336	0.397	3.15305e-08
Tmsb10	3.12037e-11	-0.136228	0.799	0.816	6.24075e-08
Pcdh19	6.49277e-10	-0.127122	0.488	0.456	1.29855e-06
mt-Nd4l	7.41039e-10	0.14778	0.999	1	1.48208e-06
Rps12	1.22664e-09	-0.10521	0.964	0.996	2.45328e-06
Rpl10	1.3525e-09	-0.150481	0.704	0.812	2.70501e-06
Lsamp	2.688e-09	0.104059	0.953	0.98	5.376e-06
Rpl32	5.02181e-09	-0.139283	0.993	0.994	1.00436e-05
Eef1a1	1.06608e-08	-0.142415	0.999	1	2.13215e-05
Rgs4	2.25285e-08	-0.128949	0.586	0.597	4.5057e-05
Dbi	3.11049e-08	-0.207423	0.277	0.383	6.22097e-05
Rpl11	5.42794e-08	0.170161	0.998	0.997	0.000108559
Id4	6.81314e-08	-0.152885	0.751	0.794	0.000136263
Rpl19	8.60023e-08	0.148194	1	0.999	0.000172005
Tmem47	1.05881e-06	-0.127163	0.209	0.257	0.00211763
Cspg5	2.69357e-06	-0.159723	0.78	0.844	0.00538714
Nfasc	3.12921e-06	-0.114284	0.771	0.736	0.00625842
Srrm2	1.43887e-05	-0.117174	0.988	0.998	0.0287774
Scd1	1.95938e-05	-0.100323	0.24	0.307	0.0391877

## Sheet: Cluster 4 - Astrocytes 1
	p_val	avg_log2FC	pct.1	pct.2	p_val_adj
Vip	4.00628e-208	-0.132205	0.625	0.192	8.01256e-205
Chd7	6.16887e-168	-0.104104	0.636	0.315	1.23377e-164
Pomc	1.51123e-143	-0.176865	0.781	0.392	3.02245e-140
Hba-a2	7.78187e-136	-0.107391	0.513	0.259	1.55637e-132
Nts	1.94276e-130	-0.305746	0.556	0.337	3.88552e-127
Npy	3.33046e-111	-0.115541	0.812	0.491	6.66092e-108
Hbb-bs	8.35651e-93	-0.191036	0.538	0.375	1.6713e-89
Prlr	1.26817e-90	-0.15666	0.821	0.595	2.53634e-87
Arap2	8.80403e-68	-0.108903	0.615	0.465	1.76081e-64
Rasgrp1	1.99746e-64	-0.120043	0.69	0.484	3.99492e-61
Lars2	1.65944e-56	-0.130247	0.882	0.739	3.31888e-53
Timp3	5.5115e-46	-0.197951	0.831	0.731	1.1023e-42
Thsd7a	6.83513e-43	-0.109818	0.54	0.433	1.36703e-39
Lrig1	1.25945e-40	-0.106853	0.655	0.509	2.51891e-37
Gap43	4.22564e-40	0.120225	0.75	0.88	8.45129e-37
Itpkb	7.37936e-39	-0.102365	0.601	0.485	1.47587e-35
Meg3	1.80637e-38	0.299398	0.987	0.995	3.61274e-35
Pmch	9.84068e-37	0.607876	0.288	0.358	1.96814e-33
Rbfox1	2.1442e-36	-0.109914	0.504	0.456	4.28839e-33
Cnn3	3.78819e-35	-0.146486	0.415	0.67	7.57638e-32
Slc17a6	1.37803e-34	-0.11943	0.789	0.665	2.75605e-31
Clic4	2.61264e-32	-0.129105	0.315	0.333	5.22528e-29
Neat1	3.11362e-32	-0.118978	0.475	0.72	6.22724e-29
Plp1	1.03705e-31	-0.13923	0.452	0.682	2.0741e-28
Snhg11	2.44208e-30	0.252935	0.993	0.984	4.88416e-27
Tril	5.02307e-30	-0.161166	0.576	0.555	1.00461e-26
Prex2	1.68188e-27	-0.186025	0.554	0.573	3.36377e-24
Psat1	1.37818e-26	-0.105575	0.28	0.498	2.75636e-23
2900052N01Rik	2.19861e-26	-0.10286	0.435	0.657	4.39721e-23
Kcnk9	3.13986e-26	-0.141933	0.598	0.557	6.27971e-23
Cd63	5.39352e-26	-0.130414	0.646	0.607	1.0787e-22
Metrn	6.36709e-26	-0.165396	0.32	0.54	1.27342e-22
Rrbp1	7.22379e-26	-0.120947	0.61	0.575	1.44476e-22
Plce1	2.08029e-25	-0.133925	0.646	0.562	4.16057e-22
Pik3r1	9.07091e-23	-0.111373	0.574	0.546	1.81418e-19
Nacc2	4.94815e-22	-0.135677	0.448	0.532	9.89631e-19
Epas1	1.03319e-21	-0.11474	0.206	0.269	2.06637e-18
S100b	2.00077e-20	-0.148946	0.456	0.612	4.00155e-17
Spon1	2.74188e-20	-0.146479	0.504	0.523	5.48376e-17
Asrgl1	7.50993e-20	-0.159417	0.59	0.643	1.50199e-16
Pbxip1	1.84167e-19	-0.102184	0.565	0.555	3.68334e-16
Sst	1.08399e-18	0.166658	0.73	0.557	2.16798e-15
Plcl1	1.95136e-17	-0.11562	0.563	0.573	3.90272e-14
Nhsl1	2.20808e-17	-0.102936	0.395	0.541	4.41616e-14
Atp1b2	9.00248e-17	-0.227596	0.635	0.792	1.8005e-13
Gpld1	1.197e-16	-0.131885	0.523	0.533	2.394e-13
Hepacam	1.22652e-16	-0.103999	0.39	0.557	2.45304e-13
Fxyd1	1.50404e-16	-0.104692	0.279	0.446	3.00808e-13
Mpp6	1.65445e-16	-0.100419	0.63	0.594	3.30891e-13
Aqp4	1.93407e-16	-0.119587	0.456	0.533	3.86814e-13
Tubb2b	6.343e-16	-0.102704	0.63	0.782	1.2686e-12
Arhgef26	2.41124e-15	-0.110005	0.46	0.52	4.82248e-12
Tmem229a	4.88826e-15	-0.119318	0.489	0.516	9.77651e-12
Enpp2	4.96972e-15	-0.111165	0.492	0.515	9.93944e-12
Ptch1	7.40972e-15	-0.11717	0.777	0.744	1.48194e-11
Atp2b1	2.39272e-14	0.11647	0.783	0.653	4.78544e-11
Npas3	1.91578e-13	-0.139633	0.282	0.42	3.83156e-10
Sparcl1	2.40725e-13	-0.242376	0.933	0.982	4.81449e-10
Id3	2.61456e-13	-0.136713	0.662	0.777	5.22913e-10
Sat1	3.46889e-13	-0.111048	0.438	0.595	6.93779e-10
S1pr1	8.24809e-13	-0.11576	0.58	0.596	1.64962e-09
Slc4a4	2.01717e-12	-0.233794	0.829	0.883	4.03433e-09
Zfhx4	4.78831e-12	-0.126773	0.399	0.482	9.57661e-09
Kcnk2	8.3744e-12	-0.136756	0.459	0.573	1.67488e-08
Calm1	8.72475e-12	0.101961	0.968	0.996	1.74495e-08
Zfhx3	1.23594e-11	-0.102557	0.545	0.689	2.47188e-08
Sdc4	1.27284e-11	-0.101904	0.636	0.625	2.54568e-08
Luzp2	3.01531e-11	-0.108391	0.627	0.627	6.03063e-08
Id2	3.71138e-11	-0.131787	0.681	0.802	7.42276e-08
Mobp	4.34302e-11	-0.111111	0.497	0.637	8.68603e-08
Phkg1	7.79736e-11	-0.126186	0.535	0.643	1.55947e-07
Rps28	8.28325e-11	0.173279	0.799	0.832	1.65665e-07
Nwd1	1.37551e-10	-0.138075	0.573	0.595	2.75102e-07
Plpp3	5.01583e-10	-0.132658	0.778	0.826	1.00317e-06
Etnppl	5.09401e-10	-0.145772	0.53	0.656	1.0188e-06
Nnat	5.98285e-10	-0.108653	0.885	0.958	1.19657e-06
Slc7a11	6.25628e-10	-0.165388	0.572	0.663	1.25126e-06
Pnoc	7.37392e-10	-0.131387	0.268	0.382	1.47478e-06
Grk3	9.2595e-10	-0.162979	0.788	0.813	1.8519e-06
Car2	2.30049e-09	-0.120566	0.356	0.446	4.60099e-06
Rpl14	2.57443e-09	0.10335	0.843	0.868	5.14886e-06
Rapgef3	3.87481e-09	-0.100053	0.578	0.681	7.74961e-06
Apoe	4.24708e-09	-0.24181	0.992	0.999	8.49417e-06
Sirt2	4.96254e-09	-0.107032	0.421	0.496	9.92508e-06
Ttyh1	6.26528e-09	-0.197652	0.792	0.855	1.25306e-05
Glul	1.42452e-08	-0.140983	0.849	0.923	2.84903e-05
Dpp10	3.39954e-08	-0.11191	0.435	0.494	6.79908e-05
Tmsb10	4.71897e-08	0.153956	0.75	0.726	9.43795e-05
Atp1a2	1.78842e-07	-0.208123	0.964	0.984	0.000357684
Mmd2	2.46937e-07	-0.133399	0.591	0.696	0.000493874
Nrgn	5.57632e-07	0.101995	0.575	0.487	0.00111526
Atp13a4	8.39635e-07	-0.108935	0.599	0.623	0.00167927
Syt1	8.69959e-07	0.166727	0.862	0.874	0.00173992
Slc1a3	9.84269e-07	-0.11583	0.854	0.917	0.00196854
Itih3	1.14079e-06	-0.24135	0.841	0.863	0.00228158
Adgrg1	4.56069e-06	-0.107113	0.516	0.61	0.00912139
Ttc3	8.28326e-06	0.150508	0.997	1	0.0165665
Cpne7	9.59475e-06	0.124101	0.639	0.545	0.0191895
Uchl1	1.08717e-05	0.132239	0.921	0.908	0.0217434
Rtn1	1.33322e-05	0.14293	0.976	0.981	0.0266643
Resp18	2.40695e-05	0.117721	0.749	0.758	0.0481389

## Sheet: Cluster 5 - Glutamatergic neuro
	p_val	avg_log2FC	pct.1	pct.2	p_val_adj
Ntng1	1.66879e-66	-0.181366	0.807	0.601	3.33758e-63
Npy	2.87601e-64	-0.111274	0.741	0.488	5.75202e-61
Auts2	1.12435e-40	-0.106577	0.426	0.296	2.24869e-37
Sox2	1.85975e-29	-0.14248	0.753	0.636	3.71949e-26
Cdh13	5.19823e-28	-0.159145	0.878	0.795	1.03965e-24
Col25a1	3.34493e-26	-0.13467	0.441	0.692	6.68987e-23
Atp1b2	6.16417e-26	-0.107481	0.4	0.638	1.23283e-22
Pcdh15	2.40649e-23	0.107042	0.564	0.373	4.81297e-20
Brinp3	2.64769e-22	-0.107476	0.827	0.715	5.29537e-19
Lcorl	3.52598e-21	0.115954	0.86	0.686	7.05197e-18
Paqr8	4.68679e-21	-0.11101	0.243	0.46	9.37357e-18
Pomc	6.30001e-21	-0.159186	0.526	0.408	1.26e-17
Nts	3.33662e-19	-0.12619	0.327	0.314	6.67323e-16
Zbtb20	6.44565e-19	-0.155041	0.83	0.727	1.28913e-15
Plp1	9.45752e-18	-0.308177	0.505	0.697	1.8915e-14
Ar	1.276e-16	-0.147978	0.737	0.684	2.55199e-13
Rps8	1.82772e-16	0.15465	0.914	0.968	3.65543e-13
Prune2	6.64202e-15	-0.109056	0.544	0.731	1.3284e-11
Gad2	9.80671e-14	-0.163273	0.357	0.537	1.96134e-10
Rgs2	1.07001e-13	-0.167507	0.459	0.64	2.14002e-10
Bsg	1.92834e-13	0.114506	0.801	0.865	3.85667e-10
Rpl17	7.94991e-13	0.167552	0.684	0.709	1.58998e-09
Basp1	1.08993e-12	-0.120854	0.898	0.982	2.17986e-09
mt-Nd1	2.59224e-12	0.260226	0.983	0.998	5.18448e-09
Pfdn5	2.73815e-12	0.114849	0.739	0.775	5.4763e-09
Pmch	3.69634e-12	0.467519	0.289	0.244	7.39268e-09
Rpl10	6.60075e-12	0.114223	0.666	0.69	1.32015e-08
Nrxn3	7.20471e-12	-0.114955	0.746	0.681	1.44094e-08
Plpp3	2.15741e-11	-0.113093	0.328	0.469	4.31482e-08
Nfix	1.71311e-10	-0.111593	0.351	0.358	3.42621e-07
Celf2	3.03502e-10	0.143275	0.853	0.907	6.07005e-07
Pcsk2	4.26841e-10	-0.170172	0.679	0.784	8.53682e-07
mt-Nd2	4.40194e-10	0.234521	0.989	1	8.80388e-07
Tenm1	1.24849e-09	-0.112671	0.479	0.504	2.49697e-06
Bcl11b	8.76425e-09	-0.112163	0.735	0.738	1.75285e-05
Eef1a1	3.19378e-08	0.138071	0.99	1	6.38756e-05
Sez6	3.65424e-08	-0.102809	0.62	0.749	7.30848e-05
Rps3a1	4.14589e-08	0.188414	0.853	0.834	8.29178e-05
Rps10	4.45965e-08	0.1892	0.802	0.777	8.9193e-05
Rps12	4.82153e-08	0.158492	0.705	0.711	9.64305e-05
Tmem130	1.21825e-07	0.176769	0.85	0.857	0.000243651
Grm5	2.46272e-07	-0.151238	0.893	0.904	0.000492544
Rpl24	4.38603e-07	0.158778	0.851	0.857	0.000877206
Rps19	5.05321e-07	0.14754	0.869	0.873	0.00101064
Pde4b	5.38795e-07	-0.123422	0.684	0.745	0.00107759
Qk	6.02488e-07	-0.107066	0.406	0.515	0.00120498
Rpl41	6.78439e-07	0.141034	0.972	0.982	0.00135688
Slit2	1.29573e-06	0.167714	0.679	0.561	0.00259147
Tubb3	1.78561e-06	-0.112332	0.704	0.811	0.00357122
Rpl18a	1.9022e-06	0.168691	0.787	0.761	0.0038044
Npnt	1.91337e-06	-0.116201	0.705	0.717	0.00382673
Hap1	2.66585e-06	0.150121	0.979	0.991	0.00533169
Fezf1	3.09185e-06	-0.1446	0.726	0.822	0.00618371
Nptx1	5.73094e-06	-0.124302	0.622	0.724	0.0114619
Nap1l5	6.85346e-06	0.103511	0.983	0.998	0.0137069
Rpl37a	7.2055e-06	0.117272	0.864	0.882	0.014411
Epha5	1.17627e-05	-0.173789	0.693	0.779	0.0235253
Tcf4	1.53328e-05	-0.124926	0.343	0.447	0.0306655

## Sheet: Cluster 6 - Nap1l5.Isl1
	p_val	avg_log2FC	pct.1	pct.2	p_val_adj
Foxg1	3.50572e-132	-0.126559	0.489	0.282	7.01145e-129
Vip	3.13675e-80	-0.116514	0.441	0.194	6.2735e-77
C1ql3	1.08147e-60	-0.114206	0.473	0.334	2.16294e-57
Nts	1.00988e-55	-0.619461	0.362	0.407	2.01976e-52
Prlr	3.25291e-52	-0.356115	0.677	0.678	6.50582e-49
Irs4	2.58993e-45	-0.124092	0.791	0.656	5.17987e-42
Pou2f2	2.16525e-42	-0.207273	0.535	0.543	4.33049e-39
Auts2	7.0227e-42	-0.144546	0.721	0.603	1.40454e-38
Reln	7.29217e-42	-0.12452	0.379	0.32	1.45843e-38
Il1rap	1.33424e-40	-0.202959	0.605	0.549	2.66848e-37
Ecel1	8.73005e-39	-0.110653	0.712	0.556	1.74601e-35
Hip1	4.35488e-36	-0.118644	0.52	0.778	8.70976e-33
Hbb-bs	4.30162e-35	-0.139903	0.449	0.376	8.60323e-32
Rasgrp1	1.96367e-34	-0.170224	0.621	0.542	3.92733e-31
Plp1	1.81001e-33	-0.112447	0.289	0.525	3.62001e-30
Rgs10	1.50532e-30	-0.158239	0.278	0.503	3.01064e-27
Gnrh1	9.12238e-30	-0.101713	0.31	0.168	1.82448e-26
Thsd7a	1.68216e-29	-0.139809	0.397	0.409	3.36432e-26
Sst	1.84074e-29	0.152129	0.635	0.403	3.68149e-26
5031439G07Rik	3.48041e-29	-0.119399	0.531	0.763	6.96083e-26
Rpl11	1.35338e-28	0.288162	0.91	0.91	2.70676e-25
Fat3	1.56182e-27	-0.132942	0.727	0.643	3.12363e-24
Gpr83	1.58426e-27	-0.131089	0.394	0.327	3.16852e-24
Gda	2.81287e-27	-0.130549	0.691	0.583	5.62575e-24
Gria3	1.54512e-25	-0.155724	0.647	0.849	3.09024e-22
Esr1	2.44042e-23	-0.118499	0.543	0.481	4.88083e-20
Lars2	2.37287e-22	0.134567	0.823	0.66	4.74575e-19
Rgs4	2.02787e-20	-0.179747	0.729	0.697	4.05573e-17
Gap43	6.14047e-20	0.124603	0.864	0.931	1.22809e-16
Dlx1	1.71874e-19	-0.161667	0.562	0.578	3.43747e-16
Ntng1	4.87779e-19	-0.266447	0.63	0.624	9.75557e-16
Lrp1b	7.36499e-19	-0.161376	0.718	0.694	1.473e-15
Sema6d	1.52877e-18	-0.100653	0.516	0.471	3.05755e-15
Ar	8.79541e-18	-0.140419	0.401	0.591	1.75908e-14
Ptgds	1.46429e-16	0.128298	0.419	0.561	2.92859e-13
Zfhx3	3.19614e-16	-0.128225	0.593	0.764	6.39228e-13
Scd2	1.11547e-15	0.144769	0.771	0.829	2.23094e-12
Pmch	1.18709e-15	0.701379	0.3	0.235	2.37419e-12
Rpl17	3.77912e-15	0.129398	0.729	0.779	7.55823e-12
Rps29	3.81821e-15	0.16796	0.918	0.956	7.63642e-12
Rpl10	7.19334e-15	0.108783	0.705	0.757	1.43867e-11
Spock1	1.61724e-14	-0.188834	0.595	0.755	3.23447e-11
mt-Nd2	3.52197e-14	0.220727	0.984	1	7.04395e-11
Rps23	5.31624e-14	0.230054	0.832	0.804	1.06325e-10
Tubb2a	5.51685e-14	0.211802	0.919	0.905	1.10337e-10
Gm45159	1.2528e-13	-0.114228	0.64	0.596	2.50559e-10
Tenm1	2.86433e-13	-0.132457	0.777	0.746	5.72865e-10
Gal	3.28301e-13	-0.122576	0.29	0.436	6.56601e-10
Pcp4	3.50532e-13	-0.152908	0.662	0.806	7.01064e-10
Rps20	6.32402e-13	0.220992	0.867	0.822	1.2648e-09
Rpl3	6.75114e-13	0.213215	0.928	0.919	1.35023e-09
Rpl32	1.07086e-12	0.167138	0.816	0.823	2.14171e-09
Rpl41	1.16644e-12	0.179086	0.974	0.987	2.33289e-09
Tuba1a	1.686e-12	0.155771	0.888	0.908	3.37199e-09
Syne1	1.91871e-12	-0.127528	0.908	0.865	3.83741e-09
Ncald	2.38409e-12	0.254273	0.842	0.8	4.76818e-09
Actb	2.40084e-12	0.221398	0.963	0.996	4.80169e-09
Slc32a1	2.80245e-12	-0.118022	0.519	0.673	5.6049e-09
Cartpt	3.29574e-12	0.143377	0.694	0.562	6.59147e-09
Pcsk1n	1.10964e-11	0.175468	0.995	0.996	2.21928e-08
Rpl37a	1.25957e-11	0.17009	0.915	0.931	2.51914e-08
Rps19	1.31349e-11	0.172081	0.886	0.897	2.62697e-08
Serpine2	2.68847e-11	-0.163855	0.376	0.471	5.37694e-08
Pnisr	2.77858e-11	-0.197947	0.908	0.94	5.55716e-08
Pfdn5	5.81876e-11	0.167448	0.793	0.784	1.16375e-07
Sv2c	5.8237e-11	-0.100624	0.669	0.634	1.16474e-07
Lsamp	7.31593e-11	-0.157288	0.864	0.941	1.46319e-07
Snhg11	8.04979e-11	-0.117684	1	1	1.60996e-07
Calm2	8.60368e-11	0.1568	0.973	0.988	1.72074e-07
Pnoc	2.27539e-10	-0.119815	0.456	0.498	4.55077e-07
Rpl8	2.4403e-10	0.137357	0.932	0.949	4.8806e-07
Uchl1	3.04503e-10	0.169295	0.966	0.968	6.09006e-07
Stmn1	5.07351e-10	0.152657	0.884	0.896	1.0147e-06
Sema6a	6.9644e-10	-0.115075	0.602	0.662	1.39288e-06
Cst3	1.61673e-09	0.158164	0.89	0.923	3.23346e-06
Fut9	2.21472e-09	-0.110839	0.454	0.589	4.42945e-06
Fau	3.19719e-09	0.112631	0.951	0.968	6.39439e-06
Rps24	3.20026e-09	0.177873	0.98	0.974	6.40051e-06
Rps14	5.57799e-09	0.179085	0.838	0.827	1.1156e-05
Kcnq3	5.69395e-09	-0.138378	0.647	0.671	1.13879e-05
Calb1	6.67502e-09	0.116035	0.603	0.637	1.335e-05
Rpl35a	6.73197e-09	0.157257	0.96	0.958	1.34639e-05
Pcdh10	7.21437e-09	-0.113835	0.702	0.702	1.44287e-05
Rpl34	7.3604e-09	0.121337	0.744	0.759	1.47208e-05
Rpl26	1.5197e-08	0.159145	0.808	0.807	3.03939e-05
Cnr1	1.66939e-08	-0.105477	0.406	0.499	3.33879e-05
Rpl14	1.71751e-08	0.166016	0.875	0.859	3.43502e-05
Rplp1	1.77233e-08	0.132455	0.956	0.976	3.54466e-05
Mef2c	2.04904e-08	-0.102278	0.394	0.461	4.09808e-05
Zdbf2	3.31844e-08	0.121803	0.893	0.805	6.63689e-05
Rps8	3.45253e-08	0.113177	0.957	0.981	6.90507e-05
Rps10	5.30562e-08	0.136091	0.858	0.852	0.000106112
Meg3	6.81142e-08	-0.127118	1	1	0.000136228
Rab3c	7.00172e-08	-0.195887	0.897	0.949	0.000140034
Tubb3	7.43385e-08	0.145318	0.784	0.783	0.000148677
Rpl38	7.55725e-08	0.140629	0.935	0.949	0.000151145
Pam	8.77692e-08	-0.10833	0.872	0.941	0.000175538
Rps21	1.12208e-07	0.183435	0.939	0.929	0.000224416
mt-Co1	1.34032e-07	0.137022	1	1	0.000268065
mt-Nd1	1.40171e-07	0.151537	0.975	0.991	0.000280341
Rpl37	2.38348e-07	0.144088	0.943	0.946	0.000476697
Zwint	4.67793e-07	0.100223	0.97	0.991	0.000935587
Atp2b1	4.67959e-07	-0.13194	0.703	0.775	0.000935918
Nell1	6.47463e-07	-0.106407	0.451	0.522	0.00129493
App	9.43862e-07	-0.111093	0.967	0.991	0.00188772
Kcnq1ot1	1.23093e-06	-0.118772	0.976	0.97	0.00246186
Rps3a1	1.39961e-06	0.124733	0.876	0.879	0.00279922
AC149090.1	1.58689e-06	-0.163002	0.898	0.931	0.00317378
Rpl18a	2.50011e-06	0.140958	0.824	0.804	0.00500021
Rps12	3.89249e-06	0.108062	0.773	0.786	0.00778498
Rpl9	5.40408e-06	0.135308	0.953	0.94	0.0108082
Psap	7.68215e-06	0.144649	0.977	0.973	0.0153643
Miat	9.75815e-06	-0.108861	0.762	0.81	0.0195163
Tac1	1.27185e-05	0.269722	0.814	0.774	0.0254371
Pdyn	1.7854e-05	0.119985	0.546	0.445	0.0357079
Syt11	1.9165e-05	0.163056	0.978	0.978	0.03833

## Sheet: Cluster 7 - Astrocytes 2
	p_val	avg_log2FC	pct.1	pct.2	p_val_adj
Pomc	7.18922e-153	-0.173603	0.646	0.219	1.43784e-149
Nts	1.94479e-132	-0.151835	0.483	0.211	3.88958e-129
Bc1	1.62969e-123	0.129847	0.368	0.789	3.25938e-120
Irs4	7.81501e-116	-0.136766	0.622	0.327	1.563e-112
Tubb2b	5.44944e-87	-0.183166	0.33	0.778	1.08989e-83
Enpp2	2.14362e-86	-0.101344	0.526	0.192	4.28724e-83
Itgb5	1.63104e-83	-0.142809	0.189	0.714	3.26207e-80
Secisbp2l	1.8218e-80	-0.110758	0.543	0.251	3.64359e-77
Hba-a2	6.71621e-74	-0.105743	0.543	0.238	1.34324e-70
Rpl10	2.0761e-69	-0.153247	0.446	0.827	4.1522e-66
Ildr2	9.39218e-69	-0.122561	0.677	0.405	1.87844e-65
Calb1	3.68381e-63	-0.210713	0.163	0.576	7.36762e-60
Peg10	1.53456e-62	-0.223574	0.625	0.392	3.06913e-59
Cacng4	2.21168e-62	-0.160511	0.415	0.254	4.42336e-59
Sst	1.10728e-55	-0.182953	0.694	0.392	2.21457e-52
Rps28	8.40254e-47	0.193751	0.499	0.781	1.68051e-43
Ap1s2	1.13281e-46	-0.145205	0.436	0.308	2.26562e-43
Plxnb1	1.11467e-43	0.298342	0.74	0.373	2.22934e-40
Igsf11	7.74812e-42	-0.107329	0.103	0.368	1.54962e-38
Nptx1	6.43188e-41	-0.11379	0.059	0.335	1.28638e-37
Cd38	1.15136e-40	0.14823	0.668	0.332	2.30272e-37
Etnppl	3.66571e-40	-0.145073	0.502	0.832	7.33141e-37
Rgma	4.57393e-40	0.166307	0.742	0.419	9.14785e-37
Grin3a	9.55447e-40	-0.107114	0.212	0.576	1.91089e-36
Chl1	1.05313e-39	-0.177498	0.111	0.376	2.10626e-36
Cnr1	5.02658e-37	-0.134024	0.05	0.27	1.00532e-33
Nfasc	1.5664e-35	-0.146644	0.659	0.462	3.13281e-32
Gm2a	2.21183e-34	0.120439	0.64	0.338	4.42365e-31
Ppp2r5a	4.41226e-34	-0.115658	0.324	0.676	8.82452e-31
Npy	1.28209e-33	-0.141404	0.704	0.503	2.56419e-30
Ncald	4.77049e-32	-0.111676	0.172	0.397	9.54098e-29
C130073E24Rik	5.37243e-32	-0.102143	0.437	0.322	1.07449e-28
Tenm1	9.99929e-32	-0.201301	0.664	0.549	1.99986e-28
Arap2	3.68888e-30	-0.167002	0.556	0.427	7.37777e-27
Slc12a4	3.09385e-29	-0.14048	0.459	0.781	6.18771e-26
Plp1	1.53939e-28	-0.186622	0.383	0.668	3.07878e-25
Zcchc24	1.95135e-28	-0.182772	0.197	0.492	3.90269e-25
Sox4	2.43417e-27	-0.145422	0.587	0.441	4.86835e-24
Glul	5.45834e-27	0.181343	0.762	0.908	1.09167e-23
Tsc22d3	3.70613e-26	-0.121056	0.258	0.465	7.41226e-23
mt-Nd3	9.4337e-26	0.222471	0.878	0.989	1.88674e-22
Mt1	3.21878e-25	0.141733	0.796	0.924	6.43756e-22
Ddo	8.00543e-25	-0.112334	0.483	0.343	1.60109e-21
Myh7	8.77631e-25	-0.104136	0.42	0.714	1.75526e-21
B2m	1.86532e-24	-0.11078	0.369	0.27	3.73065e-21
Gda	3.55397e-24	-0.119329	0.613	0.489	7.10794e-21
Nfix	7.45153e-23	-0.137858	0.522	0.454	1.49031e-19
Pcdh10	3.25617e-21	0.113492	0.774	0.554	6.51235e-18
Pcsk2	1.95906e-20	-0.143472	0.135	0.349	3.91811e-17
Gad1	4.91179e-20	-0.152341	0.407	0.384	9.82357e-17
Gpld1	1.51895e-18	-0.157898	0.693	0.584	3.03791e-15
Ptn	8.02339e-18	0.13582	0.791	0.592	1.60468e-14
Arpp21	1.34159e-17	-0.20274	0.722	0.897	2.68317e-14
Hbb-bs	2.47812e-17	-0.209096	0.1	0.286	4.95624e-14
Cmtm5	5.5013e-17	-0.19018	0.151	0.33	1.10026e-13
Atp1b2	2.21193e-16	-0.154628	0.603	0.816	4.42387e-13
Tst	9.39307e-16	-0.101512	0.202	0.405	1.87861e-12
Sfxn5	2.16797e-15	0.19762	0.714	0.492	4.33594e-12
Timp3	2.45355e-15	-0.148521	0.807	0.722	4.9071e-12
Agrp	8.39369e-14	-0.12849	0.703	0.873	1.67874e-10
Pmch	2.50268e-13	0.505372	0.351	0.262	5.00535e-10
Adgrl2	4.28565e-13	-0.111474	0.606	0.654	8.57131e-10
Asb4	9.35624e-13	-0.13886	0.701	0.638	1.87125e-09
Lifr	1.0598e-12	-0.118553	0.44	0.651	2.11961e-09
Lsamp	4.98381e-12	0.11678	0.752	0.886	9.96763e-09
Clu	5.9355e-12	0.142069	0.848	0.935	1.1871e-08
Zeb2	9.51383e-12	-0.124316	0.422	0.414	1.90277e-08
Fstl5	9.76469e-12	-0.129119	0.189	0.292	1.95294e-08
Aatk	2.29878e-11	0.127161	0.494	0.357	4.59755e-08
Sirt2	6.46111e-11	-0.127635	0.179	0.346	1.29222e-07
Calm1	1.65001e-10	0.261097	0.982	0.992	3.30003e-07
Plcb4	1.69948e-10	-0.109684	0.704	0.665	3.39896e-07
Bcas1	4.44331e-10	-0.116549	0.418	0.386	8.88661e-07
Map7	7.13871e-10	-0.139629	0.637	0.657	1.42774e-06
Tcf4	1.45854e-09	0.101645	0.835	0.708	2.91708e-06
Arhgap6	1.74406e-09	-0.102918	0.668	0.708	3.48813e-06
Lhfp	2.1631e-09	-0.148255	0.366	0.376	4.3262e-06
Epn2	2.74524e-09	-0.127407	0.646	0.605	5.49047e-06
A330076C08Rik	4.51271e-09	-0.107682	0.349	0.505	9.02541e-06
Ptch1	6.01223e-09	-0.118974	0.841	0.781	1.20245e-05
Ndn	1.35197e-08	-0.214906	0.855	0.881	2.70395e-05
Nhsl1	1.42223e-08	-0.130244	0.203	0.354	2.84446e-05
Slc1a3	4.20016e-08	0.183792	0.883	0.93	8.40032e-05
Camk2n1	6.74255e-08	-0.175954	0.666	0.738	0.000134851
Rpl26	8.72421e-08	0.140787	0.816	0.876	0.000174484
Sorbs2	1.24662e-07	-0.158919	0.701	0.684	0.000249324
Dmd	1.64699e-07	-0.124499	0.587	0.741	0.000329399
Rgs4	2.07946e-07	-0.105907	0.48	0.524	0.000415893
Prrx1	3.06319e-07	-0.144041	0.173	0.305	0.000612637
Lfng	3.28433e-07	-0.150733	0.615	0.757	0.000656865
Bex2	4.37292e-07	-0.166112	0.905	0.9	0.000874584
Msi2	4.97348e-07	0.132632	0.829	0.711	0.000994697
Car2	5.44923e-07	-0.119642	0.218	0.324	0.00108985
Cadm1	6.67668e-07	0.148872	0.785	0.832	0.00133534
Utp14b	1.3255e-06	-0.174765	0.665	0.776	0.002651
Pou3f2	1.65906e-06	-0.116915	0.39	0.395	0.00331812
Cnp	1.92462e-06	-0.113071	0.203	0.324	0.00384925
Cd63	2.45675e-06	-0.176774	0.35	0.495	0.0049135
Zfp36l1	3.75469e-06	-0.137018	0.25	0.308	0.00750938
Sncb	1.01548e-05	0.100841	0.273	0.349	0.0203095
Myo10	1.02216e-05	-0.152786	0.692	0.716	0.0204433
Oxt	1.11846e-05	-0.239959	0.148	0.257	0.0223691
Ntsr2	1.37987e-05	0.100267	0.922	0.97	0.0275975
Spon1	1.43104e-05	-0.152596	0.606	0.711	0.0286208
Rpl21	2.00697e-05	-0.164632	0.976	0.973	0.0401394
Itih3	2.18902e-05	-0.127415	0.886	0.959	0.0437803

## Sheet: Cluster 8 - Oligodendrocytes 1
	p_val	avg_log2FC	pct.1	pct.2	p_val_adj
Hbb-bs	3.51654e-173	-0.373967	0.747	0.297	7.03307e-170
Hba-a1	5.76823e-166	-0.122105	0.643	0.193	1.15365e-162
Mlc1	2.41407e-146	-0.14393	0.114	0.71	4.82815e-143
Lbhd2	4.09445e-146	-0.100226	0.196	0.836	8.1889e-143
Hbb-bt	3.22768e-135	-0.108222	0.775	0.245	6.45535e-132
Serpinb1a	7.2803e-130	-0.11863	0.741	0.31	1.45606e-126
Atp2b4	1.92519e-126	-0.108042	0.227	0.83	3.85038e-123
Htra1	4.90735e-124	0.11966	0.271	0.73	9.81469e-121
Olig2	1.21248e-122	0.102973	0.754	0.201	2.42496e-119
Npy	1.09289e-113	-0.152151	0.529	0.254	2.18578e-110
Elavl2	7.98123e-113	-0.167167	0.151	0.608	1.59625e-109
Arrdc3	2.83526e-106	0.115542	0.78	0.299	5.67053e-103
Zdbf2	5.20167e-105	-0.155686	0.774	0.443	1.04033e-101
Litaf	7.96336e-101	-0.130606	0.457	0.943	1.59267e-97
Tmeff2	1.46767e-89	0.106663	0.817	0.394	2.93534e-86
Enpp6	6.69047e-89	-0.209351	0.669	0.369	1.33809e-85
Pam	1.54078e-85	-0.152048	0.716	0.37	3.08156e-82
Gjb6	1.64971e-83	-0.119983	0.086	0.515	3.29941e-80
Phgdh	1.24737e-82	0.132946	0.807	0.369	2.49473e-79
Klk6	2.1367e-78	-0.28065	0.496	0.261	4.27339e-75
Clmn	9.93997e-77	0.331849	0.891	0.476	1.98799e-73
Secisbp2l	1.21278e-76	-0.202519	0.788	0.518	2.42555e-73
Frmd4b	2.33312e-76	0.155211	0.834	0.398	4.66625e-73
Plxdc2	3.13869e-72	-0.17671	0.589	0.343	6.27738e-69
Pclo	1.01283e-70	-0.18707	0.281	0.71	2.02565e-67
Pla2g7	4.35207e-70	-0.110462	0.271	0.726	8.70414e-67
Prox1	5.55481e-66	0.133865	0.811	0.405	1.11096e-62
Pcdh10	2.15711e-64	-0.150334	0.773	0.469	4.31422e-61
Nfix	4.70686e-62	0.12643	0.864	0.533	9.41373e-59
S1pr5	8.55541e-62	-0.155575	0.108	0.423	1.71108e-58
Ntm	1.65876e-59	-0.189203	0.776	0.591	3.31752e-56
Six3	2.79684e-53	-0.107574	0.489	0.254	5.59367e-50
Gja1	5.09e-53	-0.158576	0.138	0.493	1.018e-49
Slc2a1	2.67372e-52	-0.129585	0.16	0.507	5.34745e-49
Gstm1	2.42722e-51	-0.156316	0.2	0.485	4.85444e-48
1700047M11Rik	3.15756e-51	0.217013	0.823	0.469	6.31512e-48
Ugt8a	1.74015e-50	-0.177761	0.832	0.622	3.48031e-47
Atp1b2	1.2603e-49	-0.158571	0.617	0.391	2.5206e-46
S100b	1.85068e-49	-0.505451	0.103	0.434	3.70136e-46
5031439G07Rik	1.5146e-48	0.146103	0.84	0.527	3.02921e-45
Lrp1b	4.14831e-47	-0.121068	0.704	0.476	8.29662e-44
Deptor	8.98575e-47	-0.111773	0.617	0.358	1.79715e-43
Rgs2	1.30906e-46	-0.205919	0.488	0.828	2.61812e-43
Mast4	2.02468e-46	0.388692	0.902	0.591	4.04936e-43
Rapgef3	2.66091e-46	0.117295	0.798	0.438	5.32181e-43
Ermn	7.12001e-46	-0.149485	0.824	0.63	1.424e-42
Hba-a2	3.89294e-45	-0.246035	0.268	0.182	7.78588e-42
Map7	3.22609e-44	-0.191881	0.898	0.723	6.45218e-41
Id4	1.57136e-42	-0.116428	0.413	0.263	3.14272e-39
Scd1	1.30842e-39	-0.104038	0.158	0.409	2.61683e-36
Apod	3.48383e-38	-0.158041	0.836	0.655	6.96767e-35
Epb41l2	8.27392e-38	-0.181086	0.477	0.349	1.65478e-34
Pmch	5.87965e-36	0.695122	0.519	0.462	1.17593e-32
Msi2	1.09866e-35	-0.121492	0.72	0.509	2.19731e-32
Adgrg1	4.17484e-35	-0.114944	0.522	0.316	8.34969e-32
Acsl3	2.26312e-34	-0.153515	0.648	0.498	4.52623e-31
Pnisr	6.24053e-34	0.105974	0.926	0.717	1.24811e-30
Epha5	3.37933e-32	-0.118014	0.102	0.327	6.75866e-29
Pdlim2	5.35127e-32	-0.157901	0.242	0.542	1.07025e-28
Sgk1	5.49494e-32	0.204243	0.724	0.903	1.09899e-28
Tubb2a	1.57658e-31	-0.197766	0.806	0.71	3.15316e-28
Marcks	2.8811e-31	0.116781	0.444	0.648	5.7622e-28
Tnr	3.30044e-30	-0.135599	0.129	0.385	6.60087e-27
mt-Atp8	5.59659e-30	-0.110903	0.857	0.735	1.11932e-26
Sema5a	8.79256e-30	-0.113744	0.564	0.376	1.75851e-26
Pomc	2.54168e-29	-0.218442	0.632	0.5	5.08336e-26
Erbin	2.88145e-28	0.305144	0.824	0.564	5.7629e-25
Reep3	1.66563e-26	-0.114898	0.751	0.577	3.33127e-23
Ptgds	2.25671e-26	0.306354	0.954	0.923	4.51342e-23
Plin4	3.89712e-26	0.165744	0.836	0.973	7.79424e-23
Efhd1	5.41039e-26	0.116993	0.338	0.139	1.08208e-22
Lars2	7.30627e-26	-0.113414	0.889	0.746	1.46125e-22
Rbfox1	1.1812e-25	-0.115758	0.459	0.71	2.36241e-22
Jun	6.98207e-25	-0.184554	0.124	0.345	1.39641e-21
Csrp1	1.30997e-24	0.233815	0.855	0.631	2.61993e-21
mt-Nd3	1.49433e-24	0.12102	0.849	0.969	2.98867e-21
Tubb2b	6.51445e-24	-0.144769	0.756	0.588	1.30289e-20
Pmp22	1.88902e-23	-0.198047	0.631	0.571	3.77804e-20
Ptprn	3.98938e-23	0.110901	0.468	0.622	7.97877e-20
Tsc22d4	5.41351e-23	-0.21102	0.638	0.867	1.0827e-19
Impact	6.60647e-23	-0.165108	0.9	0.812	1.32129e-19
Hapln2	3.20531e-22	-0.104103	0.466	0.697	6.41062e-19
Anln	1.0438e-21	-0.301503	0.204	0.429	2.0876e-18
Ptma	1.35201e-21	0.156393	0.802	0.927	2.70402e-18
Gsn	1.01892e-19	-0.211893	0.759	0.664	2.03785e-16
Basp1	4.36454e-19	-0.259004	0.6	0.794	8.72908e-16
Fbxo32	8.38243e-19	-0.135516	0.196	0.412	1.67649e-15
Prex1	2.53233e-18	-0.104868	0.229	0.449	5.06466e-15
Mog	9.0186e-18	0.109913	0.823	0.664	1.80372e-14
Rpl37	1.29419e-17	-0.305729	0.984	0.976	2.58839e-14
Slc4a4	1.30686e-17	-0.203363	0.806	0.706	2.61372e-14
Ptch1	2.80312e-17	-0.109432	0.392	0.312	5.60625e-14
Lpar1	4.39396e-17	-0.175999	0.747	0.668	8.78792e-14
Ddr1	6.96465e-17	-0.219533	0.546	0.761	1.39293e-13
Ccp110	6.99413e-17	0.19774	0.84	0.648	1.39883e-13
Plpp3	1.19589e-16	-0.197055	0.62	0.591	2.39179e-13
Plekhb1	1.81889e-16	-0.274057	0.819	0.743	3.63779e-13
Gad1	2.06243e-16	-0.107372	0.144	0.277	4.12486e-13
Gpr37l1	2.2567e-16	-0.162622	0.235	0.436	4.5134e-13
Rpl38	4.07516e-16	-0.302887	0.982	0.982	8.15033e-13
2310022B05Rik	9.4155e-16	-0.146402	0.172	0.358	1.8831e-12
Tnfaip6	1.49078e-15	0.121837	0.64	0.432	2.98157e-12
Dlk1	1.10374e-14	-0.12121	0.384	0.431	2.20749e-11
Luzp2	1.6713e-14	-0.175598	0.323	0.443	3.34259e-11
Srrm2	2.05219e-14	0.100837	0.979	0.885	4.10438e-11
Gabrb1	3.95974e-14	0.101546	0.488	0.586	7.91948e-11
Agt	4.16308e-14	-0.124568	0.206	0.332	8.32616e-11
Pfdn5	7.39551e-14	-0.159943	0.812	0.772	1.4791e-10
Slc1a2	1.19088e-13	-0.348102	0.867	0.96	2.38176e-10
Ppp1r9a	1.30472e-13	-0.149784	0.455	0.566	2.60944e-10
Inf2	2.56916e-13	-0.126194	0.633	0.81	5.13833e-10
Padi2	1.27041e-12	-0.171791	0.574	0.588	2.54083e-09
Rpl24	3.27593e-12	-0.145884	0.936	0.883	6.55186e-09
Adamts4	3.37438e-12	-0.182813	0.821	0.741	6.74876e-09
C230004F18Rik	6.6546e-12	-0.182986	0.842	0.934	1.33092e-08
Actb	7.08203e-12	0.391667	0.999	1	1.41641e-08
Bcas1	1.40181e-11	-0.241685	0.407	0.422	2.80363e-08
Rrbp1	1.44094e-11	-0.115671	0.193	0.332	2.88188e-08
Rps20	2.08363e-11	-0.143009	0.934	0.883	4.16726e-08
Rps11	2.18218e-11	-0.176406	0.914	0.889	4.36436e-08
Gap43	2.75956e-11	-0.194729	0.691	0.839	5.51912e-08
Sirt2	3.08969e-11	-0.202098	0.495	0.516	6.17938e-08
Pllp	3.47561e-11	-0.115017	0.744	0.659	6.95123e-08
Gjb1	7.63246e-11	-0.124252	0.279	0.447	1.52649e-07
Kcnj10	8.93586e-11	-0.21305	0.759	0.755	1.78717e-07
Ncam2	2.07461e-10	-0.157441	0.259	0.376	4.14922e-07
Rorb	2.29118e-10	-0.120799	0.39	0.367	4.58237e-07
Pbxip1	2.3846e-10	-0.137027	0.666	0.624	4.76921e-07
Cd81	4.10159e-10	0.266164	0.883	0.845	8.20318e-07
Edil3	7.89756e-10	0.20444	0.85	0.714	1.57951e-06
Rpl36	7.97044e-10	-0.150772	0.94	0.901	1.59409e-06
Nap1l5	8.55411e-10	0.19962	0.989	0.954	1.71082e-06
Neat1	2.00756e-09	0.17795	0.916	0.805	4.01512e-06
Fth1	2.00772e-09	-0.600489	1	0.998	4.01543e-06
Rpl10	2.47524e-09	-0.139752	0.463	0.617	4.95047e-06
Ptprd	3.02267e-09	0.194649	0.887	0.776	6.04533e-06
Slc17a6	7.93752e-09	-0.131866	0.255	0.396	1.5875e-05
Bin1	1.13041e-08	0.15424	0.842	0.88	2.26082e-05
Gltp	1.59015e-08	-0.201928	0.163	0.252	3.18029e-05
Tmem63a	3.50106e-08	-0.142394	0.613	0.6	7.00211e-05
Selenop	3.5129e-08	-0.230776	0.327	0.453	7.0258e-05
Snap25	4.99539e-08	-0.128244	0.94	0.905	9.99078e-05
Fau	5.65918e-08	-0.102082	0.987	0.951	0.000113184
Meg3	5.81194e-08	-0.300037	0.993	0.974	0.000116239
Atp1a1	6.73172e-08	-0.179578	0.866	0.936	0.000134634
Rassf2	8.20691e-08	-0.109949	0.259	0.398	0.000164138
Syt4	1.21068e-07	-0.117804	0.695	0.681	0.000242137
AC149090.1	1.80968e-07	-0.135421	0.554	0.582	0.000361935
Rpl30	1.93255e-07	-0.153034	0.943	0.991	0.00038651
St18	1.94661e-07	-0.104438	0.249	0.252	0.000389322
Oxt	2.37899e-07	-1.23406	0.164	0.279	0.000475798
Hspa2	3.13243e-07	-0.107347	0.176	0.292	0.000626485
Ly6h	3.92655e-07	-0.157108	0.969	0.942	0.000785309
Rps24	4.2114e-07	-0.175427	0.996	0.982	0.00084228
Ywhag	4.39731e-07	-0.142571	0.855	0.942	0.000879462
Phldb1	5.11629e-07	0.182938	0.894	0.797	0.00102326
Metrn	5.13652e-07	-0.100882	0.154	0.265	0.0010273
Thy1	5.53699e-07	0.181493	0.516	0.378	0.0011074
Ddhd1	6.46648e-07	-0.126695	0.328	0.367	0.0012933
Pde4b	6.64591e-07	-0.218509	0.582	0.619	0.00132918
Parm1	8.12041e-07	-0.10565	0.42	0.5	0.00162408
Car2	8.35493e-07	0.190964	0.899	0.803	0.00167099
Olig1	9.15282e-07	0.235369	0.683	0.553	0.00183056
Mal	9.2391e-07	0.309094	0.967	0.936	0.00184782
Cntn2	9.66599e-07	-0.121056	0.747	0.737	0.0019332
Appl2	1.14387e-06	-0.101405	0.443	0.56	0.00228774
Mt3	1.65872e-06	-0.136273	0.868	0.87	0.00331745
Qdpr	1.72205e-06	0.10435	0.559	0.602	0.00344409
Opalin	1.81237e-06	0.241266	0.469	0.338	0.00362474
Cited1	2.60055e-06	-0.100349	0.82	0.761	0.00520111
Prr5l	3.1695e-06	-0.205556	0.829	0.894	0.00633899
Cdk19	7.13112e-06	-0.133236	0.84	0.843	0.0142622
Psat1	7.60048e-06	-0.115723	0.645	0.608	0.015201
Syt11	7.89752e-06	0.230547	0.996	0.996	0.015795
Tyro3	1.01988e-05	-0.114255	0.18	0.283	0.0203977
Chn2	1.03065e-05	-0.107921	0.795	0.765	0.020613
Fut9	2.02669e-05	-0.120397	0.422	0.487	0.0405339

## Sheet: CLuster 9 - Sim1
	p_val	avg_log2FC	pct.1	pct.2	p_val_adj
Pou2f2	6.98015e-145	-0.1552	0.939	0.473	1.39603e-141
Pomc	2.38512e-77	-0.166783	0.732	0.283	4.77024e-74
Hba-a2	7.98238e-72	-0.126286	0.509	0.177	1.59648e-68
Hbb-bs	1.85072e-64	-0.153682	0.617	0.244	3.70143e-61
Cnksr2	9.44019e-57	-0.118737	0.87	0.534	1.88804e-53
Sst	4.96663e-45	0.294779	0.826	0.413	9.93326e-42
Ephb1	1.85698e-41	-0.173744	0.666	0.449	3.71396e-38
Ptprt	3.75803e-41	-0.157528	0.6	0.385	7.51605e-38
Rbfox1	6.21837e-41	-0.148254	0.825	0.594	1.24367e-37
4930447C04Rik	4.02235e-38	-0.133035	0.847	0.58	8.04469e-35
Lypd1	4.97683e-38	-0.104107	0.661	0.403	9.95366e-35
Scn9a	5.10291e-38	-0.163114	0.808	0.565	1.02058e-34
Nfib	5.37915e-36	-0.122976	0.568	0.318	1.07583e-32
mt-Nd6	7.12115e-35	-0.102361	0.757	0.488	1.42423e-31
Hba-a1	7.17861e-35	-0.127923	0.667	0.375	1.43572e-31
Nts	3.0424e-34	-0.236055	0.358	0.286	6.0848e-31
Mast4	1.53599e-33	-0.119997	0.926	0.71	3.07198e-30
Rmst	1.50184e-29	-0.236164	0.936	0.774	3.00368e-26
Sorbs2	5.7538e-26	-0.210776	0.809	0.65	1.15076e-22
Xylt1	2.20795e-24	-0.121263	0.422	0.322	4.4159e-21
Prlr	6.85671e-24	-0.277335	0.589	0.58	1.37134e-20
Pcdh7	9.93604e-24	-0.17806	0.773	0.608	1.98721e-20
Rhou	1.13933e-23	-0.104318	0.316	0.233	2.27867e-20
Penk	4.60088e-22	-0.249852	0.565	0.42	9.20176e-19
Nos1	7.03314e-21	-0.142625	0.363	0.329	1.40663e-17
Ncam2	2.15367e-20	-0.157882	0.777	0.65	4.30734e-17
Grin3a	4.27291e-20	-0.182057	0.676	0.59	8.54582e-17
Sez6	6.65099e-20	0.286893	0.777	0.484	1.3302e-16
Nfia	8.15368e-20	-0.118294	0.542	0.41	1.63074e-16
A330069E16Rik	1.58347e-19	-0.104793	0.6	0.442	3.16695e-16
Syne1	5.71904e-19	-0.252875	0.979	0.901	1.14381e-15
Zic5	2.70355e-18	-0.12816	0.352	0.314	5.40709e-15
Fezf1	7.59195e-18	0.107351	0.308	0.428	1.51839e-14
Vgf	1.04549e-17	-0.126856	0.837	0.647	2.09097e-14
Trps1	9.68255e-17	-0.122018	0.512	0.399	1.93651e-13
Pde10a	1.44392e-16	-0.103657	0.556	0.495	2.88783e-13
Kcnk9	2.13486e-16	-0.190435	0.626	0.58	4.26971e-13
Pclo	1.48591e-15	-0.119893	0.975	0.887	2.97181e-12
Nrp2	2.0651e-15	-0.159812	0.563	0.505	4.1302e-12
Tshz2	5.78244e-15	-0.128613	0.683	0.597	1.15649e-11
mt-Atp8	5.98392e-15	-0.10035	0.348	0.604	1.19678e-11
Gabrg1	7.03518e-15	-0.101959	0.638	0.537	1.40704e-11
Pmch	1.13415e-13	0.706443	0.365	0.152	2.2683e-10
AC149090.1	8.37553e-13	-0.175894	0.972	0.912	1.67511e-09
Ccnd2	2.37075e-12	-0.136304	0.802	0.724	4.7415e-09
Zic2	1.20342e-11	-0.156741	0.227	0.293	2.40683e-08
Snca	1.58865e-11	-0.159733	0.421	0.643	3.1773e-08
Tenm1	3.41323e-11	-0.185974	0.721	0.693	6.82646e-08
Ckb	1.19531e-10	0.330215	0.921	0.912	2.39063e-07
Epha5	2.17396e-10	-0.178093	0.935	0.859	4.34792e-07
Pvalb	6.88779e-10	0.315247	0.646	0.473	1.37756e-06
Trh	9.31989e-10	0.267313	0.627	0.753	1.86398e-06
Ildr2	1.08077e-09	-0.210041	0.473	0.587	2.16155e-06
Syt2	1.22042e-09	0.168179	0.78	0.587	2.44083e-06
Atp1a2	1.52107e-09	-0.181412	0.586	0.608	3.04213e-06
Ntm	3.42844e-09	-0.19218	0.876	0.83	6.85688e-06
Lmo3	4.3835e-09	0.111049	0.806	0.625	8.76701e-06
Peg10	8.67394e-09	-0.190867	0.396	0.53	1.73479e-05
Dgkk	1.04168e-08	-0.114851	0.205	0.332	2.08336e-05
Atp1b2	3.27255e-08	-0.100748	0.592	0.569	6.54511e-05
Nefm	3.67077e-08	0.121521	0.887	0.746	7.34154e-05
Tmem130	5.07808e-08	-0.185638	0.771	0.912	0.000101562
Ebf1	5.62935e-08	-0.224805	0.34	0.466	0.000112587
Lbhd2	5.67753e-08	-0.11537	0.384	0.572	0.000113551
Camk2n1	1.11806e-07	0.179695	0.779	0.827	0.000223613
Bsg	1.21037e-07	0.146871	0.791	0.845	0.000242074
Zfhx3	1.95089e-07	-0.198299	0.656	0.777	0.000390178
Adgrg1	2.58143e-07	-0.127343	0.416	0.597	0.000516286
Gpc3	3.82432e-07	-0.101684	0.293	0.297	0.000764864
Tpt1	4.25565e-07	0.15788	0.763	0.806	0.00085113
Rps8	4.7491e-07	0.18245	0.945	0.975	0.00094982
Gm45159	5.87906e-07	-0.115839	0.449	0.509	0.00117581
Rpl36	6.13623e-07	0.155416	0.864	0.898	0.00122725
Snap25	7.71477e-07	0.246598	0.959	0.958	0.00154295
Marcks	1.21179e-06	-0.197528	0.624	0.781	0.00242357
Celf2	1.25096e-06	0.110986	0.917	0.806	0.00250193
Id4	1.32777e-06	-0.150611	0.641	0.678	0.00265553
Egr1	1.80032e-06	-0.117396	0.671	0.654	0.00360064
Rps29	2.48907e-06	0.110333	0.89	0.954	0.00497814
Rpl23	2.97102e-06	0.22551	0.911	0.905	0.00594205
Dlk1	3.17037e-06	-0.286135	0.5	0.657	0.00634074
Ncdn	4.82731e-06	0.184467	0.773	0.774	0.00965462
Oxt	8.09358e-06	2.03979	0.213	0.329	0.0161872
Bcan	8.7906e-06	0.106514	0.363	0.237	0.0175812
6330403K07Rik	9.00751e-06	0.123197	0.873	0.926	0.018015
Hsp90aa1	1.22145e-05	0.177602	0.988	1	0.024429
Igfbp5	1.59528e-05	-0.125602	0.266	0.378	0.0319057
Hsp90ab1	2.09709e-05	0.26142	0.978	0.986	0.0419417
Cbln2	2.38821e-05	-0.107312	0.378	0.424	0.0477642
Rpl8	2.39618e-05	0.149544	0.901	0.933	0.0479236

[truncated: 14 more sheets: Cluster 10 - Oligodendrocytes 2, Cluster 11 - Oligo precursors, Cluster 13 - Endothilium, Cluster 14 - Rgs16, Cluster 18 - Fezf1.Cacna2d1, Cluster 20 - Tac1.Ar, Cluster 21 - Tanycytes, Cluster 23 - Microglia 1, Cluster 25 - Microglia 2, Cluster 27 - Astrocytes 3, Cluster 28 - Ptgds.Atp1a2, Cluster 29 - Histaminergic, Cluster 30 - Cholinergic, Cluster 31 - Oligodendrocytes 3]
