# Supplementary material for: Cell-specific transcriptome changes in the hypothalamic arcuate nucleus in a mouse deoxycorticosterone acetate-salt model of hypertension
Source: Front Cell Neurosci. 2023 May 24;17:1207350. doi: 10.3389/fncel.2023.1207350 (PMC10244568; doi:10.3389/fncel.2023.1207350)
Supplement: Supplementary file 18 [file Data_Sheet_18.XLSX]

## Sheet: ShinyGo 0.75 - GO Bio Process
Table S23 - C23 DOCA DEGs Enrichment Results
Enrichment FDR	nGenes	Pathway Genes	Fold Enrichment	Pathway	URL	Genes
0.033431	4	104	19.1302	Neuropeptide signaling pathway	http://amigo.geneontology.org/amigo/term/GO:0007218	Nts Pgr15l Pmch Npy1r
0.033431	5	203	12.2509	Regulation of blood pressure	http://amigo.geneontology.org/amigo/term/GO:0008217	Cyba Nos1 Pmch Npy1r Ncald
0.0390526	10	1173	4.24029	Response to abiotic stimulus	http://amigo.geneontology.org/amigo/term/GO:0009628	Cyba Ptprk Nts Col11a1 Nos1 Ets1 Rora Arpp21 Ogt Pmch
0.04612	11	1517	3.60662	Positive regulation of multicellular organismal process	http://amigo.geneontology.org/amigo/term/GO:0051240	Prlr Mef2c Cyba Otp Cbln2 Nos1 Ets1 Rora Ogt Pmch Npy1r
0.04612	12	1787	3.34003	Homeostatic process	http://amigo.geneontology.org/amigo/term/GO:0042592	Prlr Mef2c Cyba Ncdn Nos1 Ets1 Rora Ogt Pmch Npy1r Vsnl1 Hba-a1
0.0208589	20	3751	2.65202	Regulation of biological quality	http://amigo.geneontology.org/amigo/term/GO:0065008	Prlr Mef2c Cyba Cacng4 Cbln2 Gad2 Ermn Ncdn Sparcl1 Nos1 Ets1 Rora Camkv Ogt Pmch Npy1r Ncald Vsnl1 Hba-a1 Tmsb10

## Sheet: ShinyGo 0.75 - GO Molec Funct
Enrichment FDR	nGenes	Pathway Genes	Fold Enrichment	Pathway	URL	Genes
0.00643067	2	4	248.693	Volume-sensitive chloride channel activity	http://amigo.geneontology.org/amigo/term/GO:0072320	Ttyh1 Ttyh2
0.023339	2	10	99.4773	Volume-sensitive anion channel activity	http://amigo.geneontology.org/amigo/term/GO:0005225	Ttyh1 Ttyh2
0.023339	2	12	82.8977	Neuropeptide Y receptor activity	http://amigo.geneontology.org/amigo/term/GO:0004983	Pgr15l Npy1r
0.0299653	2	19	52.3565	Intracellular calcium activated chloride channel activity	http://amigo.geneontology.org/amigo/term/GO:0005229	Ttyh1 Ttyh2
0.0299653	2	19	52.3565	Intracellular chloride channel activity	http://amigo.geneontology.org/amigo/term/GO:0061778	Ttyh1 Ttyh2
0.0299653	4	183	10.8718	Calmodulin binding	http://amigo.geneontology.org/amigo/term/GO:0005516	Nos1 Arpp21 Camkv Gap43

## Sheet: ShinyGo 0.75 - KEGG
Enrichment FDR	nGenes	Pathway Genes	Fold Enrichment	Pathway	URL	Genes
0.0311209	4	169	11.7725	Phagosome	http://www.genome.jp/kegg-bin/show_pathway?mmu04145	Cyba Nos1 Tubb2b Fcgr3
0.036983	5	372	6.6853	Neuroactive ligand-receptor interaction	http://www.genome.jp/kegg-bin/show_pathway?mmu04080	Prlr Nts Pgr15l Pmch Npy1r

## Sheet: ShinyGo 0.75 - Biocarta
None

## Sheet: ShinyGo 0.75 - Reactome
None
