# Supplementary material for: Cell-specific transcriptome changes in the hypothalamic arcuate nucleus in a mouse deoxycorticosterone acetate-salt model of hypertension
Source: Front Cell Neurosci. 2023 May 24;17:1207350. doi: 10.3389/fncel.2023.1207350 (PMC10244568; doi:10.3389/fncel.2023.1207350)
Supplement: Supplementary file 19 [file Data_Sheet_19.XLSX]

## Sheet: GO Biological Processes
Table S25 - C25 vs C23 Enrichment Results
Enrichment FDR	nGenes	Pathway Genes	Fold Enrichment	Pathway	URL	Genes
7.64458e-10	14	216	12.5529	Phagocytosis	http://amigo.geneontology.org/amigo/term/GO:0006909	Tgfb1 Mertk Nckap1l Pros1 Trem2 Aif1 Ptprc P2rx7 Arhgap25 Pycard Irf8 Pld4 Fcer1g Bin2
1.064e-10	16	263	11.7824	Adaptive immune response based on somatic recombination of immune receptors built from immunoglobulin superfamily domains	http://amigo.geneontology.org/amigo/term/GO:0002460	Tgfb1 Mef2c Vsir Prkcd Inpp5d Ptprc Il6ra P2rx7 Ctsc C1qa C1qc C1qb Fcer1g B2m H2-K1 H2-D1
6.55672e-12	20	400	9.68363	Adaptive immune response	http://amigo.geneontology.org/amigo/term/GO:0002250	Tgfb1 Mef2c Vsir Prkcd Inpp5d Ptprc Il6ra P2rx7 Ctsc Pycard C1qa C1qc C1qb Ctss Lat2 Lyn Fcer1g B2m H2-K1 H2-D1
3.26703e-10	17	342	9.627	Leukocyte mediated immunity	http://amigo.geneontology.org/amigo/term/GO:0002443	Tgfb1 Vsir Prkcd Inpp5d Ptprc P2rx7 Ctsc C1qa C1qc C1qb Lat2 Lyn Bst2 Fcer1g B2m H2-K1 H2-D1
6.94642e-14	25	558	8.67709	Immune effector process	http://amigo.geneontology.org/amigo/term/GO:0002252	Tgfb1 Vsir Prkcd Trem2 Inpp5d Cfh Ptprc Apbb1ip Il6ra Laptm5 P2rx7 Ctsc Pycard Cd37 C1qa C1qc C1qb Lat2 Irf8 Lyn Bst2 Fcer1g B2m H2-K1 H2-D1
2.4715e-10	19	441	8.34417	Mononuclear cell differentiation	http://amigo.geneontology.org/amigo/term/GO:1903131	Tgfb1 Mef2c Pou2f2 Mertk Vsir Zfp36l1 Nckap1l Trem2 Inpp5d Ptprc Il6ra Cmtm7 Prex1 Chd7 Irf8 Lyn Fcer1g B2m Mafb
7.07827e-19	37	978	7.32708	Cell activation	http://amigo.geneontology.org/amigo/term/GO:0001775	Tgfb1 Mef2c Tgfbr1 Pou2f2 Mertk Ifngr1 Vsir Zfp36l1 Prkcd Nckap1l Trem2 Aif1 Fermt3 Inpp5d Cfh Ptprc Apbb1ip Cst3 Il6ra Laptm5 P2rx7 Ctsc Pycard Cd37 Cmtm7 P2ry12 C1qa Prex1 Lat2 Chd7 Irf8 Lyn Rasal3 Cx3cr1 Fcer1g B2m Mafb
5.43766e-16	32	862	7.1897	Leukocyte activation	http://amigo.geneontology.org/amigo/term/GO:0045321	Tgfb1 Mef2c Pou2f2 Mertk Ifngr1 Vsir Zfp36l1 Prkcd Nckap1l Trem2 Aif1 Inpp5d Ptprc Apbb1ip Il6ra Laptm5 P2rx7 Ctsc Pycard Cd37 Cmtm7 C1qa Prex1 Lat2 Chd7 Irf8 Lyn Rasal3 Cx3cr1 Fcer1g B2m Mafb
2.4715e-10	21	569	7.14785	Leukocyte differentiation	http://amigo.geneontology.org/amigo/term/GO:0002521	Tgfb1 Mef2c Pou2f2 Mertk Vsir Zfp36l1 Nckap1l Trem2 Csf1r Inpp5d Ptprc Il6ra Cmtm7 C1qc Prex1 Chd7 Irf8 Lyn Fcer1g B2m Mafb
1.03162e-12	26	706	7.13242	Lymphocyte activation	http://amigo.geneontology.org/amigo/term/GO:0046649	Tgfb1 Mef2c Pou2f2 Mertk Vsir Zfp36l1 Prkcd Nckap1l Aif1 Inpp5d Ptprc Apbb1ip Il6ra Laptm5 P2rx7 Pycard Cmtm7 Prex1 Lat2 Chd7 Irf8 Lyn Rasal3 Fcer1g B2m Mafb
6.94642e-14	29	818	6.86614	Positive regulation of immune system process	http://amigo.geneontology.org/amigo/term/GO:0002684	Tgfb1 Mef2c Vsir Zfp36l1 Fyb Nckap1l Trem2 Aif1 Csf1r Inpp5d Cfh Ptprc Laptm5 P2rx7 Ctsc Pycard Cd37 P2ry12 C1qa C1qc C1qb Lat2 Lyn Rasal3 Cx3cr1 Fcer1g B2m H2-K1 H2-D1
4.41836e-11	24	703	6.61187	Regulation of cytokine production	http://amigo.geneontology.org/amigo/term/GO:0001817	Tgfb1 Pou2f2 Mertk Cd34 Ifngr1 Vsir Nckap1l Trem2 Aif1 Csf1r Inpp5d Ptprc Il6ra Laptm5 P2rx7 Pycard Trim30a Irf8 Lyn Bst2 Pld4 Cx3cr1 Fcer1g B2m
5.04985e-11	24	710	6.54668	Cytokine production	http://amigo.geneontology.org/amigo/term/GO:0001816	Tgfb1 Pou2f2 Mertk Cd34 Ifngr1 Vsir Nckap1l Trem2 Aif1 Csf1r Inpp5d Ptprc Il6ra Laptm5 P2rx7 Pycard Trim30a Irf8 Lyn Bst2 Pld4 Cx3cr1 Fcer1g B2m
2.4715e-10	24	777	5.98216	Regulation of immune response	http://amigo.geneontology.org/amigo/term/GO:0050776	Tgfb1 Mef2c Vsir Fyb Nckap1l Trem2 Inpp5d Cfh Ptprc Laptm5 P2rx7 Pycard Cd37 Trim30a C1qa C1qc C1qb Unc93b1 Lat2 Lyn Fcer1g B2m H2-K1 H2-D1
5.93123e-10	25	904	5.35599	Hemopoiesis	http://amigo.geneontology.org/amigo/term/GO:0030097	Tgfb1 Mef2c Pou2f2 Mertk Nfe2l2 Cd34 Vsir Zfp36l1 Nckap1l Trem2 Csf1r Inpp5d Ptprc Il6ra Csf3r Cmtm7 C1qc Prex1 Chd7 Irf8 Lyn Pld4 Fcer1g B2m Mafb
3.02106e-10	26	948	5.31169	Hematopoietic or lymphoid organ development	http://amigo.geneontology.org/amigo/term/GO:0048534	Tgfb1 Mef2c Tgfbr1 Pou2f2 Mertk Nfe2l2 Cd34 Vsir Zfp36l1 Nckap1l Trem2 Csf1r Inpp5d Ptprc Il6ra Csf3r Cmtm7 C1qc Prex1 Chd7 Irf8 Lyn Pld4 Fcer1g B2m Mafb
6.76693e-11	28	1032	5.25468	Negative regulation of multicellular organismal process	http://amigo.geneontology.org/amigo/term/GO:0051241	Tgfb1 Mef2c Tgfbr1 Mertk Cd34 Ifngr1 Vsir Prkcd Nckap1l Pros1 Trem2 Cd63 Inpp5d Rgs2 Ptprc Laptm5 P2rx7 Hpgds Ctsc Pycard Trim30a C1qc Lyn Bst2 Cx3cr1 Tmem119 B2m Mafb
1.98252e-13	35	1330	5.09665	Regulation of immune system process	http://amigo.geneontology.org/amigo/term/GO:0002682	Tgfb1 Mef2c Mertk Vsir Zfp36l1 Fyb Nckap1l Trem2 Aif1 Csf1r Inpp5d Cfh Ptprc Laptm5 Csf3r P2rx7 Ctsc Pycard Cd37 Trim30a P2ry12 C1qa C1qc C1qb Unc93b1 Lat2 Lyn Bst2 Rasal3 Cx3cr1 Fcer1g B2m H2-K1 H2-D1 Mafb
1.31094e-12	37	1619	4.42612	Immune response	http://amigo.geneontology.org/amigo/term/GO:0006955	Tgfb1 Mef2c Ifngr1 Vsir Ly86 Prkcd Fyb Nckap1l Trem2 Aif1 Csf1r Inpp5d Cfh Ptprc Apbb1ip Il6ra Laptm5 P2rx7 Ctsc Pycard Cd37 Trim30a C1qa C1qc C1qb Unc93b1 Ctss Lat2 Irf8 Lyn Bst2 Pld4 Cx3cr1 Fcer1g B2m H2-K1 H2-D1
2.80917e-10	32	1474	4.20456	Cell migration	http://amigo.geneontology.org/amigo/term/GO:0016477	Adora3 Tgfb1 Mef2c Tgfbr1 Mertk Nfe2l2 Cd34 Abi3 Vsir Hexb Prkcd Nckap1l Trem2 Aif1 Csf1r Fermt3 Cd63 Ptprc Zeb2 Itga6 Csf3r Pycard P2ry12 Dock10 Prex1 Lyn Bst2 Tmsb4x Cx3cr1 Camk2d Fcer1g Bin2
6.30431e-10	31	1439	4.17224	Response to biotic stimulus	http://amigo.geneontology.org/amigo/term/GO:0009607	Tgfb1 Mef2c Pou2f2 Abi3 Ifngr1 Ly86 Prkcd Trem2 Aif1 Csf1r Cfh Ptprc Laptm5 P2rx7 Pycard Cd37 Trim30a Il10ra C1qa C1qc C1qb Txnip Chd7 Irf8 Lyn Bst2 Pld4 Cx3cr1 Fcer1g B2m H2-K1
5.07251e-10	32	1517	4.08538	Positive regulation of multicellular organismal process	http://amigo.geneontology.org/amigo/term/GO:0051240	Hk2 Tgfb1 Mef2c Tgfbr1 Pou2f2 Nfe2l2 Cd34 Ifngr1 Vsir Zfp36l1 Nckap1l Trem2 Aif1 Csf1r Inpp5d Rgs2 Ptprc Zeb2 Il6ra Laptm5 P2rx7 Pycard Chd7 Irf8 Lyn Ptgs1 Cx3cr1 Camk2d Tmem119 Fcer1g B2m Qk
7.21719e-10	32	1546	4.00875	Defense response	http://amigo.geneontology.org/amigo/term/GO:0006952	Tgfb1 Mef2c Nfe2l2 Abi3 Ifngr1 Ly86 Prkcd Trem2 Aif1 Csf1r Cfh Ptprc Cst3 Laptm5 P2rx7 Ctsc Pycard Cd37 Trim30a C1qa C1qc C1qb Ctss Irf8 Lyn Bst2 Ptgs1 Pld4 Cx3cr1 Fcer1g B2m H2-K1
1.15767e-12	41	2000	3.97029	Positive regulation of response to stimulus	http://amigo.geneontology.org/amigo/term/GO:0048584	Tgfb1 Mef2c Tgfbr1 Nfe2l2 Abi3 Vsir Ly86 Prkcd Fyb Nckap1l Trem2 Fgd2 Aif1 Csf1r Cd63 Cfh Ptprc Zeb2 Il6ra Wls Laptm5 P2rx7 Ctsc Pycard Trim30a Sall1 Il10ra P2ry12 C1qa C1qc C1qb Ctss Lat2 Lyn Cx3cr1 Camk2d Fcer1g B2m H2-K1 Rpl23 H2-D1
5.43766e-16	51	2544	3.88259	Immune system process	http://amigo.geneontology.org/amigo/term/GO:0002376	Tgfb1 Mef2c Tgfbr1 Pou2f2 Mertk Nfe2l2 Cd34 Ifngr1 Vsir Zfp36l1 Ly86 Prkcd Fyb Nckap1l Trem2 Aif1 Csf1r Inpp5d Cfh Ptprc Apbb1ip Itga6 Il6ra Laptm5 Csf3r P2rx7 Ctsc Pycard Cd37 Trim30a Cmtm7 P2ry12 C1qa C1qc C1qb Unc93b1 Ctss Prex1 Lat2 Chd7 Irf8 Lyn Bst2 Rasal3 Pld4 Cx3cr1 Fcer1g B2m H2-K1 H2-D1 Mafb
1.0218e-11	46	2713	3.2838	Regulation of multicellular organismal process	http://amigo.geneontology.org/amigo/term/GO:0051239	Hk2 Tgfb1 Mef2c Tgfbr1 Pou2f2 Mertk Nfe2l2 Cd34 Ifngr1 Vsir Zfp36l1 Prkcd Nckap1l Pros1 Trem2 Aif1 Csf1r Cd63 Inpp5d Rgs2 Ptprc Zeb2 Il6ra Laptm5 Csf3r P2rx7 Hpgds Ctsc Pycard Trim30a C1qc Ctss Chd7 Irf8 Lyn Bst2 Ptgs1 Pld4 Cx3cr1 Camk2d Tmem119 Maf Fcer1g B2m Qk Mafb
5.44911e-10	43	2728	3.05276	Response to external stimulus	http://amigo.geneontology.org/amigo/term/GO:0009605	Tgfb1 Mef2c Pou2f2 Nfe2l2 Cd34 Ifngr1 Ly86 Prkcd Nckap1l Pros1 Trem2 Aif1 Csf1r Cd63 Cfh Ptprc Itga6 Cst3 Csf3r P2rx7 Ctsc Pycard Cd37 Trim30a Il10ra Cmtm7 P2ry12 C1qa C1qc C1qb Txnip Ctss Prex1 Chd7 Irf8 Lyn Bst2 Pld4 Cx3cr1 Fcer1g B2m H2-K1 Bin2
6.76693e-11	52	3640	2.76675	Regulation of response to stimulus	http://amigo.geneontology.org/amigo/term/GO:0048583	Tgfb1 Mef2c Tgfbr1 Nfe2l2 Cd34 Cyth4 Abi3 Ifngr1 Vsir Ly86 Prkcd Fyb Nckap1l Pros1 Trem2 Fgd2 Aif1 Csf1r Cd63 Inpp5d Rgs2 Cfh Ptprc Zeb2 Itga6 Il6ra Wls Laptm5 P2rx7 Arhgap25 Ctsc Pycard Cd37 Trim30a Sall1 Il10ra P2ry12 C1qa C1qc C1qb Unc93b1 Ctss Lat2 Lyn Rasal3 Cx3cr1 Camk2d Fcer1g B2m H2-K1 Rpl23 H2-D1
3.19734e-10	59	4822	2.3697	System development	http://amigo.geneontology.org/amigo/term/GO:0048731	Hk2 Tgfb1 Mef2c Tgfbr1 Pou2f2 Mertk Nfe2l2 Ctsz Cd34 Pmp22 Abi3 Ifngr1 Vsir Zfp36l1 Hexb Nckap1l Trem2 Aif1 Csf1r Inpp5d Rgs2 Cfh Ptprc Zeb2 Itga6 Cst3 Il6ra Wls Csf3r Crybb1 P2rx7 Ctsc Slco2b1 Sall1 Cmtm7 P2ry12 C1qa C1qc C1qb Txnip Zfhx3 Prex1 Chd7 Irf8 Lyn Ptgs1 Pld4 Cx3cr1 Camk2d Tmem119 Maf Fcer1g B2m H2-K1 Qk Selenop Marcks H2-D1 Mafb
2.4715e-10	60	4926	2.35898	Negative regulation of cellular process	http://amigo.geneontology.org/amigo/term/GO:0048523	Adora3 Hk2 Tgfb1 Mef2c Tgfbr1 Mertk Nfe2l2 Ctsz Cd34 Pmp22 Abi3 Vsir Zfp36l1 Prkcd Nckap1l Trem2 Aif1 Csf1r Cd63 Inpp5d Rgs2 Ptprc Zeb2 Itga6 Cst3 Rps3a1 Laptm5 Klf3 P2rx7 Hpgds Arhgap25 Itpr2 Ctsc Pycard Cd37 Trim30a Sall1 Il10ra P2ry12 C1qc Txnip Zfhx3 Chd7 Irf8 Lyn Bst2 Ptgs1 Tmsb4x Rasal3 Cx3cr1 Camk2d Tmem119 Maf Fcer1g B2m H2-K1 Qk Rpl23 H2-D1 Mafb

## Sheet: GO Molecular Functions
Enrichment FDR	nGenes	Pathway Genes	Fold Enrichment	Pathway	URL	Genes
0.0156412	2	6	64.5575	G protein-coupled adenosine receptor activity	http://amigo.geneontology.org/amigo/term/GO:0001609	Adora3 P2ry12
0.0156412	2	7	55.335	Type II transforming growth factor beta receptor binding	http://amigo.geneontology.org/amigo/term/GO:0005114	Tgfb1 Tgfbr1
0.0156412	2	7	55.335	Interleukin-6 receptor binding	http://amigo.geneontology.org/amigo/term/GO:0005138	Il6ra Pycard
0.023833	2	9	43.0383	TAP complex binding	http://amigo.geneontology.org/amigo/term/GO:0062061	H2-K1 H2-D1
0.0288679	2	11	35.2132	CD8 receptor binding	http://amigo.geneontology.org/amigo/term/GO:0042610	H2-K1 H2-D1
0.0315226	2	12	32.2788	Beta-2-microglobulin binding	http://amigo.geneontology.org/amigo/term/GO:0030881	H2-K1 H2-D1
0.0315226	2	12	32.2788	TAP binding	http://amigo.geneontology.org/amigo/term/GO:0046977	H2-K1 H2-D1
0.0341583	2	13	29.7958	G protein-coupled purinergic nucleotide receptor activity	http://amigo.geneontology.org/amigo/term/GO:0045028	P2ry12 Gpr34
0.0102326	3	21	27.6675	Purinergic nucleotide receptor activity	http://amigo.geneontology.org/amigo/term/GO:0001614	P2rx7 P2ry12 Gpr34
0.0102326	3	21	27.6675	Nucleotide receptor activity	http://amigo.geneontology.org/amigo/term/GO:0016502	P2rx7 P2ry12 Gpr34
0.0381895	2	14	27.6675	Peptidase activator activity involved in apoptotic process	http://amigo.geneontology.org/amigo/term/GO:0016505	Ctsc Pycard
0.0464485	2	16	24.2091	T cell receptor binding	http://amigo.geneontology.org/amigo/term/GO:0042608	H2-K1 H2-D1
0.0255566	3	39	14.8979	Proteoglycan binding	http://amigo.geneontology.org/amigo/term/GO:0043394	Cfh Ptprc Ctss
0.0285698	3	42	13.8338	Antigen binding	http://amigo.geneontology.org/amigo/term/GO:0003823	Tgfb1 H2-K1 H2-D1
0.0285698	3	42	13.8338	Peptidase activator activity	http://amigo.geneontology.org/amigo/term/GO:0016504	Vsir Ctsc Pycard
0.000802285	6	94	12.3621	Cytokine receptor activity	http://amigo.geneontology.org/amigo/term/GO:0004896	Ifngr1 Il6ra Csf3r Il10ra Cx3cr1 Csf2rb
0.000573584	7	118	11.4891	Immune receptor activity	http://amigo.geneontology.org/amigo/term/GO:0140375	Ifngr1 Il6ra Csf3r Il10ra Cx3cr1 Fcer1g Csf2rb
0.000802285	7	138	9.82397	Cytokine binding	http://amigo.geneontology.org/amigo/term/GO:0019955	Tgfbr1 Ifngr1 Csf1r Il6ra Csf3r Il10ra Cx3cr1
0.0341583	4	102	7.595	Cysteine-type endopeptidase activity	http://amigo.geneontology.org/amigo/term/GO:0004197	Ctsz Ctsc Pycard Ctss
0.023833	5	145	6.67836	Transmembrane receptor protein kinase activity	http://amigo.geneontology.org/amigo/term/GO:0019199	Tgfbr1 Mertk Prkcd Csf1r Lyn
0.0156412	9	423	4.12069	GTPase activator activity	http://amigo.geneontology.org/amigo/term/GO:0005096	Cyth4 Nckap1l Fgd2 Rgs2 Arhgap25 Arhgap45 Dock10 Prex1 Rasal3
0.0156412	9	439	3.97051	GTPase regulator activity	http://amigo.geneontology.org/amigo/term/GO:0030695	Cyth4 Nckap1l Fgd2 Rgs2 Arhgap25 Arhgap45 Dock10 Prex1 Rasal3
0.0156412	9	439	3.97051	Nucleoside-triphosphatase regulator activity	http://amigo.geneontology.org/amigo/term/GO:0060589	Cyth4 Nckap1l Fgd2 Rgs2 Arhgap25 Arhgap45 Dock10 Prex1 Rasal3
0.000802285	19	1151	3.19703	Enzyme regulator activity	http://amigo.geneontology.org/amigo/term/GO:0030234	Tgfb1 Cyth4 Vsir Ltc4s Prkcd Nckap1l Fgd2 Rgs2 Cst3 Arhgap25 Ctsc Pycard Arhgap45 Txnip Dock10 Prex1 Bst2 Rasal3 Rpl23
0.000141582	24	1457	3.19021	Protein-containing complex binding	http://amigo.geneontology.org/amigo/term/GO:0044877	Tgfb1 Tgfbr1 Abi3 Epb41l2 Ltc4s Hexb Fyb Nckap1l Pros1 Trem2 Aif1 Fermt3 Cd63 Ptprc Itga6 Ctss Rps21 Lyn Maf Fcer1g H2-K1 Marcks H2-D1 Mafb
0.0398234	11	786	2.71043	Protein domain specific binding	http://amigo.geneontology.org/amigo/term/GO:0019904	Mef2c Pou2f2 Nfe2l2 Abi3 Epb41l2 Prkcd Inpp5d Pycard Lat2 Lyn Qk
0.0156412	21	1869	2.1761	Molecular function regulator	http://amigo.geneontology.org/amigo/term/GO:0098772	Tgfb1 Cyth4 Vsir Ltc4s Prkcd Nckap1l Fgd2 Rgs2 Cst3 Arhgap25 Ctsc Pycard Cmtm7 Arhgap45 Txnip Dock10 Prex1 Bst2 Rasal3 Camk2d Rpl23
0.0156412	23	2140	2.08153	Identical protein binding	http://amigo.geneontology.org/amigo/term/GO:0042802	Tgfb1 Abi3 Vsir Ltc4s Hexb Csf1r Cfh Cst3 Il6ra Wls P2rx7 Hpgds Ctsc Pycard Trim30a Rasal3 Camk2d Maf Fcer1g B2m Marcks Mafb Kctd12
