# Supplementary material for: Cell-specific transcriptome changes in the hypothalamic arcuate nucleus in a mouse deoxycorticosterone acetate-salt model of hypertension
Source: Front Cell Neurosci. 2023 May 24;17:1207350. doi: 10.3389/fncel.2023.1207350 (PMC10244568; doi:10.3389/fncel.2023.1207350)
Supplement: Supplementary file 20 [file Data_Sheet_20.XLSX]

## Sheet: ShinyGo 0.75 - GO Bio Process
Table S24 - C25 DOCA DEGs Enrichment Results
Enrichment FDR	nGenes	Pathway Genes	Fold Enrichment	Pathway	URL	Genes
6.74536e-09	17	213	8.43812	Regulation of synaptic plasticity	http://amigo.geneontology.org/amigo/term/GO:0048167	Calb2 Mef2c Rasgrf2 Fam107a Epha4 Serpine2 Dbi Calb1 Ncdn Tyrobp Agt S100b Pmch Kcnj10 Grm5 Cntn2 Nrgn
5.19534e-08	23	492	4.94241	Modulation of chemical synaptic transmission	http://amigo.geneontology.org/amigo/term/GO:0050804	Calb2 Mef2c Rasgrf2 Fam107a Epha4 Serpine2 Dbi Calb1 Ncdn Slc6a1 Tyrobp Agt S100b Pmch Plcl1 Rgs4 Grin3a Kcnj10 Tubb2b Grm5 Cntn2 Nrgn Syne1
5.19718e-08	23	493	4.93239	Regulation of trans-synaptic signaling	http://amigo.geneontology.org/amigo/term/GO:0099177	Calb2 Mef2c Rasgrf2 Fam107a Epha4 Serpine2 Dbi Calb1 Ncdn Slc6a1 Tyrobp Agt S100b Pmch Plcl1 Rgs4 Grin3a Kcnj10 Tubb2b Grm5 Cntn2 Nrgn Syne1
7.90616e-08	27	699	4.08378	Anterograde trans-synaptic signaling	http://amigo.geneontology.org/amigo/term/GO:0098916	Calb2 Mef2c Syn2 Rasgrf2 Fam107a Epha4 Serpine2 Lypd1 Dbi Calb1 Ncdn Gabrb1 Slc6a1 Tyrobp Agt S100b Sncb Pmch Plcl1 Rgs4 Grin3a Kcnj10 Tubb2b Grm5 Cntn2 Nrgn Syne1
7.90616e-08	27	699	4.08378	Chemical synaptic transmission	http://amigo.geneontology.org/amigo/term/GO:0007268	Calb2 Mef2c Syn2 Rasgrf2 Fam107a Epha4 Serpine2 Lypd1 Dbi Calb1 Ncdn Gabrb1 Slc6a1 Tyrobp Agt S100b Sncb Pmch Plcl1 Rgs4 Grin3a Kcnj10 Tubb2b Grm5 Cntn2 Nrgn Syne1
6.38687e-08	34	1064	3.37842	Neuron projection development	http://amigo.geneontology.org/amigo/term/GO:0031175	Bcan Mef2c Cers2 Nfe2l2 Ctsz Abi3 Unc5b Clmn Alcam Bsg Nrp2 Epha4 Serpine2 Nfasc Zeb2 Stmn1 Ncdn Rhoh Epha5 Npy Agt Thy1 Grin3a Lyn Dmd Tubb2b Cntn2 Spock1 Col25a1 H2-K1 Tubb3 Unc5d Ccr5 Syne1
1.08028e-08	38	1206	3.33129	Neuron development	http://amigo.geneontology.org/amigo/term/GO:0048666	Bcan Mef2c Cers2 Nfe2l2 Tenm1 Ctsz Abi3 Unc5b Clmn Hcn1 Alcam Bsg Nrp2 Epha4 Serpine2 Nfasc Zeb2 Stmn1 Ncdn Rhoh Gabrb1 Epha5 Npy Agt Thy1 Pbx3 Grin3a Lyn Dmd Tubb2b Cntn2 Spock1 Col25a1 H2-K1 Tubb3 Unc5d Ccr5 Syne1
9.92555e-09	41	1374	3.15481	Biological adhesion	http://amigo.geneontology.org/amigo/term/GO:0022610	Ptpn6 Bcan Prlr Tenm1 Cd34 Utrn Fam107a Prkcd Alcam Bsg Itgb8 Tmeff2 Epha4 Serpine2 Nfasc Zbtb7b Csf3r Pcdh7 Rhoh Epha5 Cd9 Itgam Il15 Adgrg1 Cdh13 Thy1 Edil3 Tgfbi Gbp7 Lyn Dmd Hepacam Pcdh10 Rasal3 Cntn2 Ptprt Spock1 Lsamp Unc5d Sox2 Ccr5
2.11785e-08	40	1362	3.10498	Cell adhesion	http://amigo.geneontology.org/amigo/term/GO:0007155	Ptpn6 Bcan Prlr Tenm1 Cd34 Utrn Fam107a Prkcd Alcam Bsg Itgb8 Tmeff2 Epha4 Serpine2 Nfasc Zbtb7b Csf3r Pcdh7 Rhoh Epha5 Cd9 Itgam Il15 Adgrg1 Cdh13 Thy1 Edil3 Tgfbi Lyn Dmd Hepacam Pcdh10 Rasal3 Cntn2 Ptprt Spock1 Lsamp Unc5d Sox2 Ccr5
1.81702e-10	51	1765	3.05493	Neurogenesis	http://amigo.geneontology.org/amigo/term/GO:0022008	Nfix Bcan Mef2c Cers2 Nfe2l2 Tenm1 Ctsz Abi3 Unc5b Clmn Otp Hcn1 Alcam Bsg Nrp2 Epha4 Serpine2 Dbi Nfasc Zeb2 Stmn1 Ncdn Rhoh Gabrb1 Epha5 Npy Cd9 Adgrg1 Agt Thy1 Trf S100b Dner Pbx3 Six3 Mmd2 Grin3a Lyn Kcnj10 Dmd Tubb2b Grm5 Gpr183 Cntn2 Spock1 Col25a1 H2-K1 Tubb3 Unc5d Ccr5 Syne1
9.92555e-09	43	1496	3.03888	Cell-cell signaling	http://amigo.geneontology.org/amigo/term/GO:0007267	Calb2 Ndrg2 Mef2c Syn2 Cd34 Tbx3 Rasgrf2 Fam107a Epha4 Serpine2 Lypd1 Dbi Acvr1c Zeb2 Wls Calb1 Ncdn Gabrb1 Epha5 Slc6a1 Tyrobp Agt Thy1 S100b Sncb Mitf Pmch Plcl1 Rgs4 Six3 Grin3a Cacna2d1 Ildr2 Lyn Kcnj10 Tubb2b Grm5 Cntn2 Nrgn Vsnl1 Sox2 Ccr5 Syne1
1.71113e-08	42	1470	3.0207	Neuron differentiation	http://amigo.geneontology.org/amigo/term/GO:0030182	Nfix Bcan Mef2c Cers2 Nfe2l2 Tenm1 Ctsz Abi3 Unc5b Clmn Otp Hcn1 Alcam Bsg Nrp2 Epha4 Serpine2 Nfasc Zeb2 Stmn1 Ncdn Rhoh Gabrb1 Epha5 Npy Agt Thy1 Pbx3 Six3 Mmd2 Grin3a Lyn Dmd Tubb2b Cntn2 Spock1 Col25a1 H2-K1 Tubb3 Unc5d Ccr5 Syne1
1.06916e-08	45	1627	2.92416	Generation of neurons	http://amigo.geneontology.org/amigo/term/GO:0048699	Nfix Bcan Mef2c Cers2 Nfe2l2 Tenm1 Ctsz Abi3 Unc5b Clmn Otp Hcn1 Alcam Bsg Nrp2 Epha4 Serpine2 Nfasc Zeb2 Stmn1 Ncdn Rhoh Gabrb1 Epha5 Npy Adgrg1 Agt Thy1 Trf Pbx3 Six3 Mmd2 Grin3a Lyn Dmd Tubb2b Grm5 Cntn2 Spock1 Col25a1 H2-K1 Tubb3 Unc5d Ccr5 Syne1
4.20793e-12	64	2409	2.80879	Nervous system development	http://amigo.geneontology.org/amigo/term/GO:0007399	Nfix Ndrg2 Bcan Mef2c Rbfox1 Cers2 Nfe2l2 Tenm1 Ctsz Abi3 Tbx3 Unc5b Clmn Otp Hcn1 Alcam Bsg Nrp2 Epha4 Serpine2 Dbi Nfasc Acvr1c Zeb2 Mal Wls Stmn1 Ncdn Rhoh Gabrb1 Epha5 Npy Slc6a11 Cd9 Tyrobp Adgrg1 Agt Thy1 Trf S100b Gng12 Dner Rgs4 Pbx3 Six3 Mmd2 Grin3a Lyn Kcnj10 Dmd Tubb2b Grm5 Cited1 Gpr183 Cntn2 Nrgn Spock1 Col25a1 H2-K1 Tubb3 Unc5d Sox2 Ccr5 Syne1
7.90616e-08	46	1822	2.66923	Locomotion	http://amigo.geneontology.org/amigo/term/GO:0040011	Il16 Sst Mef2c Cers2 Nfe2l2 Cd34 Pltp Abi3 Unc5b Gpld1 Fam107a Prkcd Alcam Bsg Itgb8 Nrp2 Tmeff2 Epha4 Nfasc Acvr1c Zeb2 Csf3r Rhoh Epha5 Cd9 Gab1 Adgrg1 Cdh13 Agt Thy1 Cmtm7 Trib1 Trf Mitf Six3 Cmtm5 Lyn Tubb2b Grm5 Gpr183 Cntn2 Ptprt Tns1 Tubb3 Unc5d Ccr5
9.18583e-10	58	2322	2.64084	Cell development	http://amigo.geneontology.org/amigo/term/GO:0048468	Ptpn6 Bcan Mef2c Pou2f2 Cers2 Nfe2l2 Tenm1 Ctsz Abi3 Tbx3 Unc5b Clmn Otp Hcn1 Alcam Bsg Epas1 Paqr8 Nrp2 Tmeff2 Epha4 Serpine2 Nfasc Zeb2 Tmod1 Stmn1 Ncdn Rhoh Gabrb1 Epha5 Npy Cd9 Tyrobp Il15 Agt Thy1 Trib1 Trf Dner Ppp1r16b Rgs4 Pbx3 Six3 Grin3a Lyn Kcnj10 Dmd Tubb2b Grm5 Cntn2 Spock1 Col25a1 H2-K1 Tubb3 Unc5d Capn3 Ccr5 Syne1
2.1994e-12	76	3194	2.51568	Regulation of signaling	http://amigo.geneontology.org/amigo/term/GO:0023051	Gria3 Calb2 Ptpn6 Ndrg2 Prlr Mef2c Tmbim1 Cnksr3 Nfe2l2 Ncf1 Crlf3 Cyth4 Unc5b Rasgrf2 Erbin Fam107a Prkcd Hcls1 Pde10a Epha4 Serpine2 Lypd1 Dbi Traf5 Acvr1c Zeb2 Nacc2 Mal Zbtb7b Wls Calb1 Stmn1 Ncdn Rhoh Epha5 Lfng Arhgap25 Lmo3 Slc6a1 Tyrobp Trim30a Gab1 Adgrg1 Cdh13 Agt Thy1 Trib1 S100b Lpar6 Ramp1 Pmch Tspan15 Ppp1r16b Plcl1 Otud7b Rgs4 Six3 Mmd2 Grin3a Dlk1 Lyn Kcnj10 Dmd Tubb2b Grm5 Gpr183…
4.20793e-12	75	3183	2.49116	Regulation of cell communication	http://amigo.geneontology.org/amigo/term/GO:0010646	Calb2 Ptpn6 Ndrg2 Prlr Mef2c Tmbim1 Cnksr3 Nfe2l2 Ncf1 Crlf3 Cyth4 Unc5b Rasgrf2 Erbin Fam107a Prkcd Hcls1 Pde10a Epha4 Serpine2 Lypd1 Dbi Traf5 Acvr1c Zeb2 Nacc2 Mal Zbtb7b Wls Calb1 Stmn1 Ncdn Rhoh Epha5 Lfng Arhgap25 Lmo3 Slc6a1 Tyrobp Trim30a Gab1 Adgrg1 Cdh13 Agt Thy1 Trib1 S100b Lpar6 Ramp1 Pmch Tspan15 Ppp1r16b Plcl1 Otud7b Rgs4 Six3 Mmd2 Grin3a Dlk1 Lyn Kcnj10 Dmd Tubb2b Grm5 Gpr183 Rasal…
1.08706e-08	58	2510	2.44304	Cell surface receptor signaling pathway	http://amigo.geneontology.org/amigo/term/GO:0007166	Gria3 Ptpn6 Ndrg2 Prlr Mef2c Tmbim1 Ncf1 Crlf3 Unc5b Gpld1 Prkcd Hcls1 Itgb8 Nrp2 Epha4 Serpine2 Traf5 Acvr1c Zeb2 Mal Zbtb7b Wls Stmn1 Csf3r Epha5 Lfng Tyrobp Itgam Hpgd Il15 Gab1 Adgrg1 Cdh13 Agt Thy1 Trib1 Trf Mitf Dner Tspan15 Rgs4 Six3 Grin3a Gpr34 Dlk1 Lyn Grm5 Cited1 Cntn2 Ptprt Irs4 Tubb3 Unc5d Csf2rb Sox2 Ccr5 Peg10 Syne1
2.10965e-09	63	2728	2.44159	Response to external stimulus	http://amigo.geneontology.org/amigo/term/GO:0009605	Il16 Ptpn6 Prlr Mef2c Pou2f2 Cers2 Nfe2l2 Ncf1 Cd34 Nts Unc5b Erbin Fam107a Prkcd Alcam Bsg Tfeb Itgb8 Nrp2 Epha4 Serpine2 Nfasc Ncf2 Acvr1c Stmn1 Csf3r Rhoh Epha5 Npy Clec4a2 Cd9 Tyrobp Cd37 Trim30a Hpgd Il15 Gab1 Cdh13 Agt Cmtm7 Trib1 Trf Slfn8 Gng12 Kcnk2 Grin3a Gbp7 Cmtm5 Irf8 Lyn Dmd Tubb2b Upk1b Cited1 Gpr183 Pld4 Cntn2 H2-K1 Tubb3 Unc5d Trim12a Capn3 Ccr5
4.78815e-09	62	2713	2.41612	Regulation of multicellular organismal process	http://amigo.geneontology.org/amigo/term/GO:0051239	Hk2 Il16 Ptpn6 Ndrg2 Prlr Mef2c Pou2f2 Cers2 Nfe2l2 Cd34 Tbx3 Utrn Gpld1 Otp Erbin Prkcd Hcls1 Bsg Epas1 Itgb8 Epha4 Serpine2 Acvr1c Zeb2 Zbtb7b Csf3r Rhoh Lfng Tmem176b Tbxas1 Clec4a2 Cd9 Tyrobp Trim30a Tsc22d3 Il15 Gab1 Agt Thy1 Trib1 Trf Lmo2 S100b Mitf Pmch Kcnk2 Ppp1r16b Plcl1 Otud7b Rgs4 Pbx3 Cacna2d1 Irf8 Lyn Kcnj10 Dmd Grm5 Cited1 Pld4 Capn3 Ccr5 Syne1
7.07025e-09	63	2821	2.3611	Regulation of localization	http://amigo.geneontology.org/amigo/term/GO:0032879	Hk2 Il16 Ptpn6 Sst Mef2c Tmbim1 Cnksr3 Cers2 Nfe2l2 Tenm1 Pltp Abi3 Gpld1 Rasgrf2 Hcn1 Fam107a Prkcd Hcls1 Bsg Tmeff2 Epha4 Serpine2 Lypd1 Dbi Acvr1c Pld1 Wls Stmn1 Rhoh Epha5 Slc6a1 Cd9 Tyrobp Trim30a Il15 Gab1 Adgrg1 Cdh13 Agt Thy1 Trib1 Trf Mitf Otud7b Rgs4 Mmd2 Grin3a Cacna2d1 Lyn Kcnj10 Dmd Tubb2b Grm5 Gpr183 Ptprt Vsnl1 Unc5d Ifi27 Trim12a Scn9a Capn3 Ccr5 Syne1
1.39554e-15	104	4822	2.28025	System development	http://amigo.geneontology.org/amigo/term/GO:0048731	Hk2 Nfix Dnase2a Ptpn6 Ndrg2 Bcan Prlr Mef2c Pou2f2 Rbfox1 Cers2 Nfe2l2 Tenm1 Ctsz Cd34 Abi3 Tbx3 Ikzf1 Unc5b Clmn Gpld1 Otp Hcn1 Alcam Hcls1 Bsg Tfeb Epas1 Itgb8 Nrp2 Tmeff2 Epha4 Serpine2 Dbi Nfasc Acvr1c Zeb2 Mal Zbtb7b Wls Calb1 Tmod1 Stmn1 Ncdn Csf3r Rhoh Gabrb1 Epha5 Crybb1 Lfng Tmem176b Npy Slc6a11 Cd9 Tyrobp Tsc22d3 Hpgd Il15 Gab1 Adgrg1 Cdh13 Agt Thy1 Cmtm7 Trib1 Trf Lmo2 S100b Ramp1 Mit…
1.81702e-10	77	3590	2.26763	Animal organ development	http://amigo.geneontology.org/amigo/term/GO:0048513	Hk2 Nfix Dnase2a Ptpn6 Bcan Prlr Mef2c Pou2f2 Rbfox1 Nfe2l2 Ctsz Cd34 Tbx3 Ikzf1 Otp Hcn1 Hcls1 Bsg Tfeb Epas1 Itgb8 Nrp2 Tmeff2 Epha4 Serpine2 Dbi Zeb2 Zbtb7b Wls Calb1 Tmod1 Stmn1 Csf3r Rhoh Epha5 Crybb1 Lfng Tmem176b Npy Slc6a11 Cd9 Tyrobp Tsc22d3 Hpgd Il15 Gab1 Adgrg1 Agt Thy1 Cmtm7 Trib1 Trf Lmo2 S100b Mitf Tgfbi Gng12 Dner Kcnk2 Rgs4 Pbx3 Six3 Ildr2 Irf8 Lyn Dmd Tubb2b Cited1 Gpr183 Pld4 Cn…
7.44484e-13	92	4330	2.24634	Cell differentiation	http://amigo.geneontology.org/amigo/term/GO:0030154	Nfix Dnase2a Ptpn6 Ndrg2 Bcan Prlr Mef2c Pou2f2 Rbfox1 Cers2 Nfe2l2 Tenm1 Ctsz Cd34 Abi3 Tbx3 Ikzf1 Unc5b Clmn Otp Hcn1 Alcam Hcls1 Bsg Epas1 Itgb8 Paqr8 Nrp2 Tmeff2 Epha4 Serpine2 Dbi Nfasc Acvr1c Zeb2 Zbtb7b Tmod1 Stmn1 Ncdn Csf3r Rhoh Gabrb1 Epha5 Lfng Tmem176b Npy Lmo3 Cd9 Tyrobp Il15 Adgrg1 Agt Thy1 Cmtm7 Trib1 Trf Lmo2 S100b Mitf Tgfbi Dner Ppp1r16b Rgs4 Pbx3 Six3 Mmd2 Grin3a Ildr2 Cmtm5 Dl…
7.44484e-13	93	4404	2.2326	Cellular developmental process	http://amigo.geneontology.org/amigo/term/GO:0048869	Nfix Dnase2a Ptpn6 Ndrg2 Bcan Prlr Mef2c Pou2f2 Rbfox1 Cers2 Nfe2l2 Tenm1 Ctsz Cd34 Abi3 Tbx3 Ikzf1 Unc5b Clmn Otp Hcn1 Prkcd Alcam Hcls1 Bsg Epas1 Itgb8 Paqr8 Nrp2 Tmeff2 Epha4 Serpine2 Dbi Nfasc Acvr1c Zeb2 Zbtb7b Tmod1 Stmn1 Ncdn Csf3r Rhoh Gabrb1 Epha5 Lfng Tmem176b Npy Lmo3 Cd9 Tyrobp Il15 Adgrg1 Agt Thy1 Cmtm7 Trib1 Trf Lmo2 S100b Mitf Tgfbi Dner Ppp1r16b Rgs4 Pbx3 Six3 Mmd2 Grin3a Ildr2 Cm…
3.45005e-08	64	3042	2.22432	Cellular response to chemical stimulus	http://amigo.geneontology.org/amigo/term/GO:0070887	Hk2 Il16 Ptpn6 Prlr Mef2c Agrp Elavl2 Nfe2l2 Ncf1 Cd34 Gpx3 Gpld1 Erbin Hcn1 Fam107a Prkcd Hcls1 Bsg Epas1 Itgb8 Paqr8 Nrp2 Epha4 Lypd1 Ncf2 Traf5 Acvr1c Zeb2 Zbtb7b Calb1 Csf3r Slc2a5 Gabrb1 Epha5 Lmo3 Hpgd Il15 Gab1 Agt Trib1 Trf Lmo2 S100b Ramp1 Gna15 Kcnk2 Rgs4 Cacna2d1 Gbp7 Rcsd1 Irf8 Lyn Dmd Grm5 Cited1 Gpr183 Ptprt Vsnl1 Irs4 Gstm1 Csf2rb Capn3 Ccr5 Peg10
9.18583e-10	76	3640	2.20744	Regulation of response to stimulus	http://amigo.geneontology.org/amigo/term/GO:0048583	Il16 Dnase2a Ptpn6 Ndrg2 Prlr Mef2c Tmbim1 Cnksr3 Cers2 Nfe2l2 Ncf1 Cd34 Crlf3 Cyth4 Abi3 Utrn Unc5b Gpld1 Rasgrf2 Erbin Prkcd Hcls1 Pde10a Epha4 Serpine2 Lypd1 Traf5 Zeb2 Nacc2 Mal Zbtb7b Wls Stmn1 Rhoh Lfng Npy Arhgap25 Lmo3 Cd9 Tyrobp Cd37 Trim30a Il15 Gab1 Adgrg1 Cdh13 Agt Thy1 Trib1 S100b Lpar6 Ramp1 Tspan15 Kcnk2 Ppp1r16b Otud7b Rgs4 Six3 Mmd2 Grin3a Dlk1 Lyn Dmd Tubb2b Grm5 Gpr183 Rasal3 C…
7.90894e-09	75	3751	2.11393	Regulation of biological quality	http://amigo.geneontology.org/amigo/term/GO:0065008	Hk2 Gria3 Calb2 Dnase2a Ptpn6 Prlr Mef2c Syn2 Nfe2l2 Cd34 Abi3 Tbx3 Ikzf1 Rasgrf2 Erbin Hcn1 Fam107a Prkcd Hcls1 Bsg Epas1 Nrp2 Epha4 Serpine2 Dbi Ncf2 Traf5 Acvr1c Zbtb7b Calb1 Tmod1 Stmn1 Ncdn Slc2a5 Rhoh Gabrb1 Epha5 Npy Tbxas1 Slc6a11 Slc6a1 Cd9 Tyrobp Tsc22d3 Il15 Adgrg1 Agt Thy1 Trf Lmo2 S100b Lpar6 Gna15 Lars2 Pmch Kcnk2 Plcl1 Rgs4 Grin3a Cacna2d1 Ildr2 Lyn Kcnj10 Dmd Grm5 Gpr183 Ncald Cnt…
1.76764e-08	88	4926	1.88871	Negative regulation of cellular process	http://amigo.geneontology.org/amigo/term/GO:0048523	Hk2 Nfix Ptpn6 Ndrg2 Prlr Mef2c Tmbim1 Cnksr3 Cers2 Nfe2l2 Ctsz Cd34 Crlf3 Abi3 Tbx3 Ikzf1 Unc5b Clmn Gpld1 Otp Erbin Fam107a Prkcd Hcls1 Pde10a Epas1 Tmeff2 Epha4 Serpine2 Lypd1 Dbi Traf5 Acvr1c Zeb2 Nacc2 Zbtb7b Tmod1 Stmn1 Rhoh Epha5 Lfng Tmem176b Arhgap25 Lmo3 Slc6a1 Cd9 Tyrobp Cd37 Trim30a Tsc22d3 Hpgd Il15 Adgrg1 Cdh13 Agt Thy1 Trib1 Lmo2 S100b Sncb Mitf Pmch Tspan15 Kcnk2 Ppp1r16b Otud7b R…

## Sheet: ShinyGO 0.75 - GO Molec Funct
Enrichment FDR	nGenes	Pathway Genes	Fold Enrichment	Pathway	URL	Genes
0.0115034	2	2	105.725	Calcium ion binding involved in regulation of cytosolic calcium ion concentration	http://amigo.geneontology.org/amigo/term/GO:0099510	Calb2 Calb1
0.0115034	2	2	105.725	Calcium ion binding involved in regulation of presynaptic cytosolic calcium ion concentration	http://amigo.geneontology.org/amigo/term/GO:0099534	Calb2 Calb1
0.0309825	2	4	52.8623	Gamma-aminobutyric acid:sodium symporter activity	http://amigo.geneontology.org/amigo/term/GO:0005332	Slc6a11 Slc6a1
0.0376313	2	5	42.2899	Phospholipase D activity	http://amigo.geneontology.org/amigo/term/GO:0004630	Gpld1 Pld1
0.0376313	2	5	42.2899	Transmembrane receptor protein tyrosine phosphatase activity	http://amigo.geneontology.org/amigo/term/GO:0005001	Ptpn6 Ptprt
0.0376313	2	5	42.2899	Transmembrane receptor protein phosphatase activity	http://amigo.geneontology.org/amigo/term/GO:0019198	Ptpn6 Ptprt
0.046746	2	6	35.2415	Netrin receptor activity	http://amigo.geneontology.org/amigo/term/GO:0005042	Unc5b Unc5d
0.0309825	3	17	18.6573	Lamin binding	http://amigo.geneontology.org/amigo/term/GO:0005521	Dmd Ifi27 Syne1
0.0309825	4	38	11.1289	Neuropeptide receptor binding	http://amigo.geneontology.org/amigo/term/GO:0071855	Agrp Nts Npy Pmch
0.0245329	7	132	5.60661	Integrin binding	http://amigo.geneontology.org/amigo/term/GO:0005178	Utrn Itgb8 Cd9 Thy1 Tgfbi Lyn Dmd
0.000673448	13	272	5.05302	Cell adhesion molecule binding	http://amigo.geneontology.org/amigo/term/GO:0050839	Ptpn6 Tenm1 Utrn Bsg Itgb8 Nfasc Cd9 Cdh13 Thy1 Tgfbi Lyn Dmd Ptprt
3.10864e-08	43	1502	3.02674	Signaling receptor binding	http://amigo.geneontology.org/amigo/term/GO:0005102	Il16 Ptpn6 Sst Prlr Agrp Tmbim1 Utrn Nts Erbin Itgb8 Epha4 Serpine2 Lypd1 Dbi Traf5 Acvr1c Wls Gabrb1 Npy Cd9 Tyrobp Il15 Agt Thy1 Cmtm7 Trf S100b Gna15 Pmch Tgfbi Dner Plcl1 Six3 Cmtm5 Lyn Kcnj10 Dmd Grm5 Irs4 H2-K1 Tubb3 Capn3 Syne1
0.0416856	12	443	2.86387	Actin binding	http://amigo.geneontology.org/amigo/term/GO:0003779	Abi3 Utrn Clmn Fam107a Hcls1 Tmod1 Rcsd1 Dmd Ncald Tns1 Ccr5 Syne1
0.0101293	19	709	2.83324	Calcium ion binding	http://amigo.geneontology.org/amigo/term/GO:0005509	Calb2 Bcan Calb1 Pcdh7 Clec4a2 Cdh13 Lpcat2 S100b Edil3 Sncb Dner Necab1 Dlk1 Pcdh10 Ncald Vsnl1 Spock1 Hpcal1 Capn3
0.0395548	13	499	2.75435	DNA-binding transcription activator activity	http://amigo.geneontology.org/amigo/term/GO:0001216	Nfix Mef2c Pou2f2 Nfe2l2 Tbx3 Tfeb Epas1 Zeb2 Zbtb7b Mitf Pbx3 Six3 Sox2
0.0309825	18	786	2.42117	Protein domain specific binding	http://amigo.geneontology.org/amigo/term/GO:0019904	Gria3 Ptpn6 Mef2c Pou2f2 Nfe2l2 Ncf1 Abi3 Ikzf1 Prkcd Hcls1 Epha4 Nfasc Gng12 Trps1 Lyn Dmd Cited1 Irs4
0.024281	37	2140	1.82795	Identical protein binding	http://amigo.geneontology.org/amigo/term/GO:0042802	Syn2 Tenm1 Crlf3 Gpx3 Abi3 Hcn1 Alcam Sat1 Nrp2 Epha4 Dbi Traf5 Nacc2 Zbtb7b Wls Slc6a1 Tyrobp Trim30a Hpgd Cdh13 Lmo2 S100b Tgfbi Grin3a Necab1 Kcnj10 Grm5 Cited1 Rasal3 Ptprt Gstm1 Col25a1 Trim12a Capn3 Ccr5 Syne1 Kctd12
0.0376313	58	4136	1.4826	Cation binding	http://amigo.geneontology.org/amigo/term/GO:0043169	Calb2 Bcan Prlr Pltp Utrn Prkcd Pde10a Epas1 Sat1 Nrp2 Ecel1 Traf5 Acvr1c Zeb2 Acss1 Zdbf2 Zbtb7b Calb1 Pcdh7 Lfng Tbxas1 Clec4a2 Lmo3 Slc6a1 Tyrobp Itgam Trim30a Cdh13 Trf Lmo2 Lpcat2 S100b Edil3 Gna15 Sncb Slfn8 Dner Ddhd1 Otud7b Trps1 Grin3a Cacna2d1 Necab1 Dlk1 Trim56 Dmd Tshz2 Pcdh10 Ncald Vsnl1 Spock1 Gstm1 Gda Trim12a Hpcal1 Scn9a Capn3 Peg10

## Sheet: ShinyGo 0.75 - KEGG
Enrichment FDR	nGenes	Pathway Genes	Fold Enrichment	Pathway	URL	Genes
0.0427466	4	40	10.5725	Nicotine addiction	http://www.genome.jp/kegg-bin/show_pathway?mmu05033	Gria3 Gabrb1 Slc17a6 Grin3a
0.0427466	6	113	5.6137	Glutamatergic synapse	http://www.genome.jp/kegg-bin/show_pathway?mmu04724	Gria3 Pld1 Slc17a6 Gng12 Grin3a Grm5
0.0286438	8	160	5.28623	Cell adhesion molecules	http://www.genome.jp/kegg-bin/show_pathway?mmu04514	Cd34 Alcam Itgb8 Nfasc Itgam Selplg Cntn2 H2-K1
0.0427466	11	372	3.12627	Neuroactive ligand-receptor interaction	http://www.genome.jp/kegg-bin/show_pathway?mmu04080	Gria3 Sst Prlr Nts Gabrb1 Npy Agt Lpar6 Pmch Grin3a Grm5

## Sheet: ShinyGo 0.75 - Biocarta
None

## Sheet: ShinyGo 0.75 - Reactome
Enrichment FDR	nGenes	Pathway Genes	Fold Enrichment	Pathway	URL	Genes
0.0452184	2	4	52.8623	Reuptake of GABA	https://reactome.org/download/current	Slc6a11 Slc6a1
0.0452184	3	19	16.6934	EPHA-mediated growth cone collapse	https://reactome.org/download/current	Epha4 Epha5 Lyn
0.0452184	7	144	5.13939	Neurotransmitter receptors and postsynaptic signal transmission	https://reactome.org/download/current	Gria3 Gabrb1 Gng12 Grin3a Kcnj10 Ncald Nrgn
0.00785132	10	212	4.98701	Transmission across Chemical Synapses	https://reactome.org/download/current	Gria3 Syn2 Gabrb1 Slc6a11 Slc6a1 Gng12 Grin3a Kcnj10 Ncald Nrgn
0.0256861	9	209	4.55274	G alpha q signalling events	https://reactome.org/download/current	Nts Prkcd Agt Lpar6 Gna15 Pmch Gng12 Rgs4 Grm5
0.00785132	13	341	4.03056	Neuronal System	https://reactome.org/download/current	Gria3 Syn2 Hcn1 Gabrb1 Slc6a11 Slc6a1 Gng12 Kcnk2 Grin3a Kcnj10 Grm5 Ncald Nrgn
0.0452184	15	608	2.60834	Hemostasis	https://reactome.org/download/current	Ptpn6 Prkcd Bsg Pde10a Serpine2 Pcdh7 Cd9 Itgam Trf Gna15 Gng12 Lyn Tubb2b Selplg Tubb3
